# Supplementary material for: Scion genotypes exert long distance control over rootstock transcriptome responses to low phosphate in grafted grapevine
Source: BMC Plant Biol. 2020 Aug 3;20:367. doi: 10.1186/s12870-020-02578-y (PMC7398338; doi:10.1186/s12870-020-02578-y)
Supplement: Supplementary file 1 — Additional file 1. Genes differentially expressed between high or low phosphate treatments (HP and LP respectively) in four scion/rootstock combinations of grapevine. [file 12870_2020_2578_MOESM1_ESM.xlsx]

## Sheet: Feuil1
Additional File 1. Genes differentially expressed between high or low phosphate treatments (HP and LP respectively) in four scion/rootstock combinations of grapevine. PN: Vitis vinifera cv. Pinot noir; 1103P: V. rupestris x V. berlandieri cv. 1103 Paulsen.
	1103P/1103P LP versus 1103P/1103P HP						1103P/PN LP versus 1103P/PN HP						PN/1103P LP versus PN/1103P HP						PN/PN LP versus PN/PN HP							Araport11 Annotation															MapMan Annotation from Mercator 4
Gene identifier V3	baseMean	log2 Fold Change	Standard error	stat	p-value	Adjusted p-values	baseMean	log2 Fold Change	Standard error	stat	p-value	Adjusted p-values	baseMean	log2 Fold Change	Standard error	stat	p-value	Adjusted p-values	baseMean	log2 Fold Change	Standard error	stat	p-value	Adjusted p-values	V1 gene identifier	Ara11.sseqid	Ara11.evalue	Ara11.bitscore	Ara11.hit.nb	Ara11.other.hits	Ara11.Name	Ara11.Note	Ara11.curator_summary	Ara11.symbol	Ara11.Alias	Ara11.full_name	Ara11.computational_description	Ara11.conf_rating	Ara11.Dbxref	manual	BINCODE	NAME	DESCRIPTION
Vitvi14g01365	161.214	1.84481	0.365543	5.04677	4.49342e-07	9.28295e-05	161.214	2.7493	0.43172	6.36826	1.91185e-10	7.91676e-09	161.214	1.56814	0.361616	4.33648	1.4478e-05	0.00013885	161.214	1.64123	0.400462	4.09833	4.16135e-05	0.000376652	VIT_14s0083g01210	AT3G51550.1	5e-232	802.7	1-to-1	NA	AT3G51550.1	Malectin/receptor-like protein kinase family protein	Encodes a synergid-expressed%2C plasma-membrane localized receptor-like kinase that accumulates asymetrically in the synergid membrnane at the filiform apparatus and mediates male-female gametophyte interactions during pollen tube reception. Also involved in powdery mildew infection.	"FER"	NA	FERONIA	FERONIA (FER)%3B FUNCTIONS IN: protein kinase activity%2C kinase activity%3B INVOLVED IN: pollen tube reception%2C post-embryonic development%2C protein amino acid autophosphorylation%3B LOCATED IN: filiform apparatus%2C plasma membrane%2C membrane%3B EXPRESSED IN: 28 plant structures%3B EXPRESSED DURING: 13 growth stages%3B CONTAINS InterPro DOMAIN/s: Protein kinase%2C ATP binding site (InterPro…	****	PMID:14506206.PMID:17317660.PMID:17432890.PMID:17644812.PMID:19736323.PMID:21075962.gene:2081894.UniProt:Q9SCZ4	NA	'18.8.1.16'	'Protein modification.phosphorylation.TKL kinase superfamily.CrlRLK1 kinase'	'Protein modification.phosphorylation.TKL kinase superfamily.CrlRLK1 kinase (original description: none)'
Vitvi07g02517	35.7603	1.71358	0.374355	4.57742	4.70744e-06	0.000553449	35.7603	2.96793	0.477479	6.21584	5.10514e-10	1.98165e-08	35.7603	1.2997	0.359577	3.61452	0.000300905	0.0018705	35.7603	5.06775	0.589677	8.59411	8.39154e-18	1.04059e-15	VIT_00s0253g00080	AT3G50440.1	2.3e-48	191.4	1-to-1	NA	AT3G50440.1	methylesterase	Encodes a protein shown to have methyl jasmonate esterase activity in vitro. This protein does not act on methyl IAA%2C MeSA%2C MeGA4%2C or MEGA9 in vitro.	"MES10"	ATMES10.ARABIDOPSIS THALIANA METHYL ESTERASE 10	methyl esterase 10	methyl esterase 10 (MES10)%3B CONTAINS InterPro DOMAIN/s: Alpha/beta hydrolase fold-1 (InterPro:IPR000073)%3B BEST Arabidopsis thaliana protein match is: methyl esterase 1 (TAIR:AT2G23620.1)%3B Has 1602 Blast hits to 1600 proteins in 360 species: Archae - 4%3B Bacteria - 838%3B Metazoa - 1%3B Fungi - 25%3B Plants - 612%3B Viruses - 0%3B Other Eukaryotes - 122 (source: NCBI BLink).	****	PMID:18467465.gene:2098684.UniProt:Q8S9K8	NA	'35.1'	'not assigned.annotated'	'Methylesterase 10 OS=Arabidopsis thaliana (sp|q8s9k8|mes10_arath : 184.0)'
Vitvi12g02284	686.202	1.58406	0.327414	4.8381	1.31084e-06	0.000209475	686.202	1.76764	0.364191	4.85361	1.21231e-06	2.14197e-05	686.202	1.12655	0.325997	3.45572	0.000548831	0.0031211	686.202	1.15936	0.326769	3.54796	0.000388229	0.00257929	VIT_12s0028g02870	AT4G35160.1	3.4e-36	151	1-to-1	NA	AT4G35160.1	O-methyltransferase family protein	NA	NA	NA	NA	O-methyltransferase family protein%3B FUNCTIONS IN: methyltransferase activity%2C O-methyltransferase activity%2C protein dimerization activity%3B LOCATED IN: cytosol%3B CONTAINS InterPro DOMAIN/s: Winged helix-turn-helix transcription repressor DNA-binding (InterPro:IPR011991)%2C Plant methyltransferase dimerisation (InterPro:IPR012967)%2C O-methyltransferase%2C family 2 (InterPro:IPR001077)%2C …	****	PMID:9144260.PMID:9484457.gene:2132805.UniProt:Q9T003	NA	'50.2.1'	'Enzyme classification.EC_2 transferases.EC_2.1 transferase transferring one-carbon group'	'Trans-resveratrol di-O-methyltransferase OS=Vitis vinifera (sp|b6vjs4|romt_vitvi : 316.0) & Enzyme classification.EC_2 transferases.EC_2.1 transferase transferring one-carbon group(50.2.1 : 129.2) (original description: none)'
Vitvi07g01651	215.819	1.27646	0.233777	5.46017	4.75681e-08	1.59361e-05	215.819	1.73499	0.215072	8.06702	7.20354e-16	8.10398e-14	215.819	1.4054	0.244949	5.73753	9.60661e-09	2.04677e-07	215.819	1.28123	0.196052	6.53514	6.35513e-11	2.23883e-09	VIT_07s0129g00730	AT4G37370.1	6.5e-153	539.3	1-to-1	NA	AT4G37370.1	cytochrome P450%2C family 81%2C subfamily D%2C polypeptide 8	member of CYP81D	"CYP81D8"	NA	cytochrome P450%2C family 81%2C subfamily D%2C polypeptide 8	cytochrome P450%2C family 81%2C subfamily D%2C polypeptide 8 (CYP81D8)%3B FUNCTIONS IN: electron carrier activity%2C monooxygenase activity%2C iron ion binding%2C oxygen binding%2C heme binding%3B INVOLVED IN: response to karrikin%3B LOCATED IN: endoplasmic reticulum%2C plasma membrane%3B EXPRESSED IN: 20 plant structures%3B EXPRESSED DURING: 13 growth stages%3B CONTAINS InterPro DOMAIN/s: Cytoch…	****	PMID:16618929.PMID:17317660.gene:2126341.UniProt:Q9SZT7	NA	'50.1.13'	'Enzyme classification.EC_1 oxidoreductases.EC_1.14 oxidoreductase acting on paired donor with incorporation or reduction of molecular oxygen'	'Cytochrome P450 81E8 OS=Medicago truncatula (sp|q6wnq8|c81e8_medtr : 501.0) & Enzyme classification.EC_1 oxidoreductases.EC_1.14 oxidoreductase acting on paired donor with incorporation or reduction of molecular oxygen(50.1.13 : 313.8) (original description: none)'
Vitvi18g01755	308.991	1.26028	0.342043	3.68458	0.000229076	0.00949743	308.991	1.5889	0.361087	4.40031	1.08097e-05	0.000144727	308.991	2.04327	0.34977	5.84175	5.16548e-09	1.1748e-07	308.991	1.81911	0.32303	5.6314	1.7875e-08	3.73793e-07	VIT_18s0075g00440	AT5G17680.2	1.5e-64	248.8	1-to-1	NA	AT5G17680.2	disease resistance protein (TIR-NBS-LRR class)	NA	NA	NA	NA	NA	NA	NA	NA	'26.6.2.1'	'External stimuli response.biotic stress.pathogen effector.NLR effector receptor'	'External stimuli response.biotic stress.pathogen effector.NLR effector receptor (original description: none)'
Vitvi07g03041	284.615	1.20569	0.237345	5.0799	3.77626e-07	8.29782e-05	284.615	2.25922	0.261321	8.64536	5.36337e-18	9.03071e-16	284.615	1.72711	0.236388	7.30622	2.74758e-13	1.5463e-11	284.615	1.84281	0.232775	7.9167	2.43892e-15	2.0574e-13		AT1G22360.1	1e-147	522.3	1-to-1	NA	AT1G22360.1	UDP-glucosyl transferase 85A2	NA	"UGT85A2"	AtUGT85A2.UDP-glucosyl transferase 85A2	UDP-glucosyl transferase 85A2	UDP-glucosyl transferase 85A2 (UGT85A2)%3B FUNCTIONS IN: UDP-glycosyltransferase activity%2C transferase activity%2C transferring glycosyl groups%2C glucuronosyltransferase activity%3B INVOLVED IN: metabolic process%3B LOCATED IN: cellular_component unknown%3B EXPRESSED IN: 21 plant structures%3B EXPRESSED DURING: 11 growth stages%3B CONTAINS InterPro DOMAIN/s: UDP-glucuronosyl/UDP-glucosyltransf…	****	PMID:12912986.gene:2196500.UniProt:Q9ZWJ3	NA	'50.2.4'	'Enzyme classification.EC_2 transferases.EC_2.4 glycosyltransferase'	'Linamarin synthase 2 OS=Manihot esculenta (sp|g3fin9|ugtk5_manes : 423.0) & Enzyme classification.EC_2 transferases.EC_2.4 glycosyltransferase(50.2.4 : 267.8) (original description: none)'
Vitvi13g02203	85.6565	1.10061	0.267898	4.1083	3.98576e-05	0.00250885	85.6565	1.26361	0.261385	4.83429	1.33625e-06	2.32943e-05	85.6565	1.54005	0.290449	5.30231	1.14346e-07	1.87509e-06	85.6565	1.33233	0.23334	5.70981	1.13103e-08	2.46492e-07		AT5G33406.1	2.8e-60	231.5	1-to-1	NA	AT5G33406.1	hAT dimerization domain-containing protein / transposase-like protein	NA	NA	NA	NA	hAT dimerisation domain-containing protein / transposase-related%3B FUNCTIONS IN: protein dimerization activity%3B INVOLVED IN: biological_process unknown%3B LOCATED IN: mitochondrion%3B CONTAINS InterPro DOMAIN/s: HAT dimerisation (InterPro:IPR008906)%3B BEST Arabidopsis thaliana protein match is: hAT transposon superfamily (TAIR:AT4G15020.2)%3B Has 707 Blast hits to 681 proteins in 26 species: …	**	gene:504953008.UniProt:F4KHA1	NA	'35.2'	'not assigned.not annotated'	' no hits & (original description: none)'
Vitvi14g01865	1630.76	1.00634	0.225084	4.47097	7.78651e-06	0.000832778	1630.76	1.31334	0.249736	5.25892	1.44907e-07	3.25466e-06	1630.76	1.15582	0.224705	5.14371	2.69371e-07	4.04553e-06	1630.76	1.18773	0.222515	5.33775	9.41061e-08	1.67067e-06	VIT_14s0066g02320	AT3G28345.1	6.8e-232	803.1	1-to-1	NA	AT3G28345.1	ABC transporter family protein	Encodes an ATP-binding cassette (ABC) transporter. Expressed in the vascular tissue of primary stem.	"ABCB15"	MDR13.multi-drug resistance 13	ATP-binding cassette B15	ABC transporter family protein%3B FUNCTIONS IN: ATPase activity%2C coupled to transmembrane movement of substances%3B INVOLVED IN: transport%2C transmembrane transport%3B LOCATED IN: plasma membrane%3B EXPRESSED IN: shoot apex%2C inflorescence meristem%2C cotyledon%2C hypocotyl%2C flower%3B EXPRESSED DURING: petal differentiation and expansion stage%3B CONTAINS InterPro DOMAIN/s: ATPase%2C AAA+ t…	**	PMID:17317660.gene:3438234.UniProt:Q9LHD1	NA	'24.1.3.1.1'	'Solute transport.primary active transport.ABC superfamily.ABC1 family.subfamily ABCB transporter'	'Solute transport.primary active transport.ABC superfamily.ABC1 family.subfamily ABCB transporter (original description: none)'
Vitvi18g00839	5170.56	-1.00221	0.263442	-3.80431	0.000142201	0.00647295	5170.56	-2.09941	0.294292	-7.13374	9.7678e-13	5.9987e-11	5170.56	-1.96366	0.26315	-7.46216	8.51154e-14	5.2932e-12	5170.56	-1.58202	0.262935	-6.01677	1.77931e-09	4.6697e-08	VIT_18s0001g11130	AT2G26530.1	1.2e-51	202.2	1-to-1	NA	AT2G26530.1	AR781%2C pheromone receptor-like protein (DUF1645)	unknown function	"AR781"	NA	NA	AR781%3B FUNCTIONS IN: molecular_function unknown%3B INVOLVED IN: biological_process unknown%3B LOCATED IN: plasma membrane%3B EXPRESSED IN: 21 plant structures%3B EXPRESSED DURING: 10 growth stages%3B CONTAINS InterPro DOMAIN/s: Protein of unknown function DUF1645 (InterPro:IPR012442)%3B BEST Arabidopsis thaliana protein match is: Protein of unknown function (DUF1645) (TAIR:AT2G15760.1)%3B Has 1…	*****	PMID:12953064.PMID:16146321.PMID:16258011.PMID:17317660.gene:2066235.UniProt:O48720	NA	'35.2'	'not assigned.not annotated'	' no hits & (original description: none)'
Vitvi17g01433	1060.42	-1.00289	0.255106	-3.93124	8.45074e-05	0.00444222	1060.42	-1.4539	0.286591	-5.07307	3.91439e-07	8.03905e-06	1060.42	-2.16941	0.255146	-8.50264	1.85327e-17	2.56865e-15	1060.42	-1.33514	0.255273	-5.23023	1.693e-07	2.82748e-06	VIT_17s0000g04840	AT3G48800.1	1.1e-14	81.3	1-to-1	NA	AT3G48800.1	Sterile alpha motif (SAM) domain-containing protein	NA	NA	NA	NA	Sterile alpha motif (SAM) domain-containing protein%3B CONTAINS InterPro DOMAIN/s: Sterile alpha motif-type (InterPro:IPR013761)%2C Sterile alpha motif (InterPro:IPR001660)%2C Sterile alpha motif homology (InterPro:IPR010993)%2C Sterile alpha motif%2C type 2 (InterPro:IPR011510)%3B BEST Arabidopsis thaliana protein match is: Sterile alpha motif (SAM) domain-containing protein (TAIR:AT5G23680.1)%3…	*****	gene:2099447.UniProt:Q9M303	NA	'35.2'	'not assigned.not annotated'	' no hits & (original description: none)'
Vitvi06g00741	17485.9	-1.01494	0.263142	-3.85699	0.00011479	0.00559394	17485.9	-2.34175	0.294137	-7.96144	1.70044e-15	1.76466e-13	17485.9	-1.62574	0.263085	-6.17955	6.42857e-10	1.83672e-08	17485.9	-1.84654	0.263053	-7.01965	2.2242e-12	1.05473e-10	VIT_06s0004g07500	AT2G38470.1	1.5e-62	239.6	1-to-1	NA	AT2G38470.1	WRKY DNA-binding protein 33	Member of the plant WRKY transcription factor family. Regulates the antagonistic relationship between defense pathways mediating responses to P. syringae and necrotrophic fungal pathogens. Located in nucleus. Involved in response to various abiotic stresses - especially salt stress.	"WRKY33"	ATWRKY33.WRKY DNA-BINDING PROTEIN 33	WRKY DNA-binding protein 33	WRKY DNA-binding protein 33 (WRKY33)%3B CONTAINS InterPro DOMAIN/s: DNA-binding WRKY (InterPro:IPR003657)%3B BEST Arabidopsis thaliana protein match is: WRKY DNA-binding protein 4 (TAIR:AT1G13960.1)%3B Has 7573 Blast hits to 4449 proteins in 326 species: Archae - 2%3B Bacteria - 120%3B Metazoa - 293%3B Fungi - 170%3B Plants - 5689%3B Viruses - 9%3B Other Eukaryotes - 1290 (source: NCBI BLink).	****	PMID:11118137.PMID:17427812.PMID:17722694.gene:2057211.UniProt:Q8S8P5	"WRKY33"	'15.7.22'	'RNA biosynthesis.transcriptional activation.WRKY transcription factor'	'RNA biosynthesis.transcriptional activation.WRKY transcription factor (original description: none)'
Vitvi08g00283	3847.52	-1.04341	0.252079	-4.13921	3.48498e-05	0.00227664	3847.52	-1.97885	0.281747	-7.02351	2.16367e-12	1.25026e-10	3847.52	-1.3801	0.251873	-5.47936	4.26855e-08	7.75632e-07	3847.52	-1.53691	0.252059	-6.09741	1.07799e-09	2.92828e-08	VIT_08s0032g01150	AT3G11820.1	1.4e-99	361.7	1-to-1	NA	AT3G11820.1	syntaxin of plants 121	Encodes a syntaxin localized at the plasma membrane (SYR1%2C Syntaxin Related Protein 1%2C also known as SYP121%2C PENETRATION1/PEN1). SYR1/PEN1 is a member of the SNARE superfamily proteins. SNARE proteins are involved in cell signaling%2C vesicle traffic%2C growth and development. SYR1/PEN1 functions in positioning anchoring of the KAT1 K+ channel protein at the plasma membrane. Transcription i…	"SYP121"	AT-SYR1.ATSYP121.ATSYR1.SYNTAXIN RELATED PROTEIN 1.PEN1.PENETRATION1.SYR1.SYNTAXIN RELATED PROTEIN 1	syntaxin of plants 121	syntaxin of plants 121 (SYP121)%3B FUNCTIONS IN: protein anchor%2C SNAP receptor activity%3B INVOLVED IN: in 13 processes%3B LOCATED IN: SNARE complex%2C plasma membrane%3B EXPRESSED IN: 24 plant structures%3B EXPRESSED DURING: 13 growth stages%3B CONTAINS InterPro DOMAIN/s: Target SNARE coiled-coil domain (InterPro:IPR000727)%2C Syntaxin/epimorphin%2C conserved site (InterPro:IPR006012)%2C t-SNA…	****	PMID:11591731.PMID:15060130.PMID:16531497.PMID:16732289.PMID:17317660.PMID:17662029.PMID:17644812.PMID:17683934.PMID:18678865.PMID:11884682.PMID:19825544.gene:2081475.UniProt:Q9ZSD4	NA	'22.8.1.1'	'Vesicle trafficking.SNARE target membrane recognition and fusion complexes.Qa-type SNARE components.SYP1-group protein'	'Vesicle trafficking.SNARE target membrane recognition and fusion complexes.Qa-type SNARE components.SYP1-group protein (original description: none)'
Vitvi02g00338	5115.66	-1.04349	0.158526	-6.58243	4.6281e-11	7.99042e-08	5115.66	-1.91553	0.179069	-10.6972	1.04916e-26	6.83972e-24	5115.66	-1.939	0.15862	-12.2242	2.30851e-34	7.51909e-31	5115.66	-1.4161	0.160066	-8.84694	8.99503e-19	1.27478e-16	VIT_02s0025g03660	AT3G48990.1	3.7e-189	659.8	1-to-1	NA	AT3G48990.1	AMP-dependent synthetase and ligase family protein	Encodes an oxalyl-CoA synthetase and is required for oxalate degradation%2C for normal seed development%2C and for defense against an oxalate-producing fungal pathogen.	"AAE3"	NA	ACYL-ACTIVATING ENZYME 3	AMP-dependent synthetase and ligase family protein%3B FUNCTIONS IN: catalytic activity%2C AMP binding%3B INVOLVED IN: response to cadmium ion%3B LOCATED IN: apoplast%2C chloroplast%3B EXPRESSED IN: 26 plant structures%3B EXPRESSED DURING: 15 growth stages%3B CONTAINS InterPro DOMAIN/s: AMP-binding%2C conserved site (InterPro:IPR020845)%2C AMP-dependent synthetase/ligase (InterPro:IPR000873)%3B BE…	****	PMID:16242667.PMID:16502469.PMID:18431481.PMID:18538804.PMID:21166475.gene:2101367.UniProt:Q9SMT7	NA	'35.1'	'not assigned.annotated'	'Oxalate--CoA ligase OS=Arabidopsis thaliana (sp|q9smt7|4clla_arath : 577.0)'
Vitvi10g01594	1630.28	-1.04729	0.262574	-3.98856	6.64763e-05	0.00369478	1630.28	-2.16598	0.293398	-7.38237	1.55498e-13	1.12317e-11	1630.28	-1.77939	0.261594	-6.8021	1.03103e-11	4.25761e-10	1630.28	-1.88976	0.26224	-7.20621	5.75288e-13	3.04216e-11	VIT_10s0003g00140	AT3G15210.1	4.2e-33	140.6	1-to-1	NA	AT3G15210.1	ethylene responsive element binding factor 4	Encodes a member of the ERF (ethylene response factor) subfamily B-1 of ERF/AP2 transcription factor family (ATERF-4). The protein contains one AP2 domain. Acts as a negative regulator of JA-responsive defense gene expression and resistance to the necrotrophic fungal pathogen Fusarium oxysporum and antagonizes JA inhibition of root elongation.	"ERF4"	ATERF-4.ETHYLENE RESPONSIVE ELEMENT BINDING FACTOR 4.ATERF4.ETHYLENE RESPONSIVE ELEMENT BINDING FACTOR 4.RAP2.5.RELATED TO AP2 5	ethylene responsive element binding factor 4	ethylene responsive element binding factor 4 (ERF4)%3B CONTAINS InterPro DOMAIN/s: DNA-binding%2C integrase-type (InterPro:IPR016177)%2C Pathogenesis-related transcriptional factor/ERF%2C DNA-binding (InterPro:IPR001471)%3B BEST Arabidopsis thaliana protein match is: ethylene response factor 8 (TAIR:AT1G53170.1)%3B Has 6170 Blast hits to 5786 proteins in 253 species: Archae - 0%3B Bacteria - 0%3B…	*****	PMID:11118137.PMID:11487705.PMID:16021341.PMID:16183832.PMID:16280546.PMID:16442528.PMID:16429262.PMID:16407444.PMID:17189334.PMID:17722694.gene:2087064.UniProt:O80340	VviERF-8	'15.7.7.1'	'RNA biosynthesis.transcriptional activation.AP2/ERF superfamily.ERF-type transcription factor'	'RNA biosynthesis.transcriptional activation.AP2/ERF superfamily.ERF-type transcription factor (original description: none)'
Vitvi08g01702	2386.24	-1.05442	0.272666	-3.86709	0.000110142	0.0054221	2386.24	-1.0637	0.306416	-3.47144	0.000517682	0.00401676	2386.24	-1.10103	0.272728	-4.03712	5.4112e-05	0.000432913	2386.24	-1.92734	0.274581	-7.01921	2.23132e-12	1.05609e-10	VIT_08s0007g06060	AT3G57240.1	2.5e-113	407.1	1-to-1	NA	AT3G57240.1	beta-1%2C3-glucanase 3	encodes a member of glycosyl hydrolase family 17	"BG3"	AtBG3	beta-1%2C3-glucanase 3	beta-1%2C3-glucanase 3 (BG3)%3B FUNCTIONS IN: cellulase activity%2C hydrolase activity%2C hydrolyzing O-glycosyl compounds%3B INVOLVED IN: response to bacterium%3B LOCATED IN: apoplast%2C cell wall%3B EXPRESSED IN: 15 plant structures%3B EXPRESSED DURING: 9 growth stages%3B CONTAINS InterPro DOMAIN/s: Glycoside hydrolase%2C catalytic core (InterPro:IPR017853)%2C Glycoside hydrolase%2C family 17 (…	****	PMID:15593128.PMID:18538804.gene:2082517.UniProt:F4J270	NA	'50.3.2'	'Enzyme classification.EC_3 hydrolases.EC_3.2 glycosylase'	'Enzyme classification.EC_3 hydrolases.EC_3.2 glycosylase(50.3.2 : 468.0) & Glucan endo-1.3-beta-glucosidase. basic isoform OS=Prunus persica (sp|p52408|e13b_prupe : 438.0) (original description: none)'
Vitvi14g03052	451.824	-1.0545	0.276501	-3.81371	0.000136895	0.00631468	451.824	-1.93682	0.31863	-6.07858	1.21251e-09	4.26981e-08	451.824	-1.23877	0.277626	-4.462	8.11988e-06	8.38936e-05	451.824	-2.23447	0.28416	-7.86343	3.7377e-15	3.05936e-13	VIT_14s0066g02610	NA	NA	NA	NA	NA	NA	NA	NA	NA	NA	NA	NA	NA	NA	NA	'35.2'	'not assigned.not annotated'	' no hits & (original description: none)'
Vitvi08g01752	1247.36	-1.05664	0.216533	-4.87981	1.06188e-06	0.000179488	1247.36	-1.88328	0.243218	-7.74317	9.69713e-15	8.65086e-13	1247.36	-1.2219	0.21531	-5.67506	1.38637e-08	2.85797e-07	1247.36	-1.45703	0.216033	-6.74447	1.53582e-11	6.2137e-10	VIT_08s0007g06670	AT5G06710.1	6e-36	150.6	1-to-1	NA	AT5G06710.1	homeobox leucine zipper protein	Homeobox-leucine zipper protein.	"HAT14"	NA	homeobox from Arabidopsis thaliana	homeobox from Arabidopsis thaliana (HAT14)%3B FUNCTIONS IN: DNA binding%2C sequence-specific DNA binding transcription factor activity%3B INVOLVED IN: regulation of transcription%2C DNA-dependent%2C regulation of transcription%3B LOCATED IN: nucleus%3B EXPRESSED IN: 18 plant structures%3B EXPRESSED DURING: 9 growth stages%3B CONTAINS InterPro DOMAIN/s: Homeobox%2C conserved site (InterPro:IPR0179…	****	PMID:11118137.gene:2170193.UniProt:P46665	NA	'35.1'	'not assigned.annotated'	'Homeobox-leucine zipper protein HAT14 OS=Arabidopsis thaliana (sp|p46665|hat14_arath : 132.0)'
Vitvi11g00485	5867.95	-1.05868	0.254905	-4.15322	3.27829e-05	0.00221421	5867.95	-1.22883	0.285063	-4.31072	1.62722e-05	0.000208634	5867.95	-1.19867	0.254803	-4.70428	2.54757e-06	3.01737e-05	5867.95	-1.575	0.255005	-6.17637	6.55926e-10	1.86984e-08	VIT_11s0016g05530	AT5G20230.1	6.7e-16	83.6	1-to-1	NA	AT5G20230.1	blue-copper-binding protein	Al-stress-induced gene	"BCB"	ATBCB.blue-copper-binding protein.SAG14.SENESCENCE ASSOCIATED GENE 14	blue-copper-binding protein	blue-copper-binding protein (BCB)%3B FUNCTIONS IN: electron carrier activity%2C copper ion binding%3B INVOLVED IN: response to oxidative stress%2C response to salt stress%2C aluminum ion transport%2C response to wounding%2C response to absence of light%3B LOCATED IN: anchored to plasma membrane%2C plasma membrane%2C vacuole%2C anchored to membrane%3B EXPRESSED IN: 24 plant structures%3B EXPRESSED…	****	PMID:11351099.PMID:12805588.PMID:15539469.PMID:16247729.PMID:17317660.PMID:14517339.gene:2149248.UniProt:Q07488	NA	'35.1'	'not assigned.annotated'	'Umecyanin OS=Armoracia rusticana (sp|p42849|umec_armru : 85.1)'
Vitvi06g01961	2523.11	-1.06009	0.239718	-4.42223	9.76857e-06	0.00097433	2523.11	-2.20913	0.268373	-8.23155	1.84802e-16	2.25894e-14	2523.11	-1.24858	0.239712	-5.20868	1.90191e-07	2.96755e-06	2523.11	-2.04248	0.239631	-8.52342	1.54903e-17	1.83816e-15	VIT_06s0080g00450	AT3G10300.2	9.5e-15	80.9	1-to-many	AT3G10300.5	AT3G10300.2	Calcium-binding EF-hand family protein	NA	NA	NA	NA	Calcium-binding EF-hand family protein%3B FUNCTIONS IN: calcium ion binding%3B INVOLVED IN: biological_process unknown%3B LOCATED IN: cellular_component unknown%3B EXPRESSED IN: 22 plant structures%3B EXPRESSED DURING: 14 growth stages%3B CONTAINS InterPro DOMAIN/s: EF-Hand 1%2C calcium-binding site (InterPro:IPR018247)%2C EF-HAND 2 (InterPro:IPR018249)%2C EF-hand-like domain (InterPro:IPR011992)…	****	PMID:16023399.gene:1005714700.UniProt:Q8W4L0-2	NA	'35.2'	'not assigned.not annotated'	' no hits & (original description: none)'
Vitvi12g00145	833.37	-1.06364	0.185804	-5.72452	1.03726e-08	5.22325e-06	833.37	-1.59165	0.2075	-7.6706	1.71197e-14	1.47548e-12	833.37	-1.04194	0.188994	-5.51308	3.52613e-08	6.55055e-07	833.37	-2.0123	0.186739	-10.776	4.46881e-27	2.01511e-24	VIT_12s0028g01640	AT4G32300.1	2.6e-90	331.6	1-to-1	NA	AT4G32300.1	S-domain-2 5	NA	"SD2-5"	NA	S-domain-2 5	S-domain-2 5 (SD2-5)%3B FUNCTIONS IN: carbohydrate binding%2C protein kinase activity%2C kinase activity%3B INVOLVED IN: protein amino acid autophosphorylation%3B LOCATED IN: plasma membrane%3B EXPRESSED IN: 25 plant structures%3B EXPRESSED DURING: 15 growth stages%3B CONTAINS InterPro DOMAIN/s: Curculin-like (mannose-binding) lectin (InterPro:IPR001480)%2C Protein kinase%2C ATP binding site (Int…	*****	PMID:17317660.PMID:17644812.gene:3439137.UniProt:Q8RWZ5	NA	'50.2.7'	'Enzyme classification.EC_2 transferases.EC_2.7 transferase transferring phosphorus-containing group'	'G-type lectin S-receptor-like serine/threonine-protein kinase SD2-5 OS=Arabidopsis thaliana (sp|q8rwz5|sd25_arath : 332.0) & Enzyme classification.EC_2 transferases.EC_2.7 transferase transferring phosphorus-containing group(50.2.7 : 120.1) (original description: none)'
Vitvi19g00057	7010.95	-1.07077	0.254162	-4.21293	2.52074e-05	0.00179731	7010.95	-2.9534	0.284549	-10.3792	3.08256e-25	1.56748e-22	7010.95	-1.7022	0.254231	-6.69547	2.14972e-11	8.23756e-10	7010.95	-2.57292	0.254266	-10.119	4.55088e-24	1.32784e-21		AT1G53440.1	4.9e-60	233	1-to-1	NA	AT1G53440.1	Leucine-rich repeat transmembrane protein kinase	NA	NA	NA	NA	Leucine-rich repeat transmembrane protein kinase%3B FUNCTIONS IN: kinase activity%3B INVOLVED IN: protein amino acid phosphorylation%3B LOCATED IN: plasma membrane%3B EXPRESSED IN: 22 plant structures%3B EXPRESSED DURING: 13 growth stages%3B CONTAINS InterPro DOMAIN/s: Serine/threonine-protein kinase domain (InterPro:IPR002290)%2C Leucine-rich repeat (InterPro:IPR001611)%2C Serine-threonine/tyros…	****	PMID:17317660.gene:2203717.UniProt:C0LGG9	NA	'50.2.7'	'Enzyme classification.EC_2 transferases.EC_2.7 transferase transferring phosphorus-containing group'	'Probable LRR receptor-like serine/threonine-protein kinase At1g53440 OS=Arabidopsis thaliana (sp|c0lgg9|y5344_arath : 155.0) & Enzyme classification.EC_2 transferases.EC_2.7 transferase transferring phosphorus-containing group(50.2.7 : 43.7) (original description: none)'
Vitvi14g03045	1345.23	-1.07252	0.259704	-4.12977	3.63129e-05	0.00234058	1345.23	-2.41978	0.289917	-8.34646	7.03382e-17	9.88038e-15	1345.23	-1.39075	0.261394	-5.32052	1.0347e-07	1.71508e-06	1345.23	-1.70774	0.258118	-6.61614	3.68703e-11	1.35671e-09	VIT_14s0066g02110	AT5G40010.1	3.8e-156	549.7	1-to-1	NA	AT5G40010.1	AAA-ATPase 1	Encodes a mitochondrial ATPase involved in seed and silique development.	"AATP1"	ASD.ATPase-in-Seed-Development	AAA-ATPase 1	AAA-ATPase 1 (AATP1)%3B FUNCTIONS IN: nucleoside-triphosphatase activity%2C ATPase activity%2C nucleotide binding%2C ATP binding%3B EXPRESSED IN: stem%2C inflorescence meristem%2C root%2C flower%2C stamen%3B EXPRESSED DURING: 4 anthesis%2C petal differentiation and expansion stage%3B CONTAINS InterPro DOMAIN/s: ATPase%2C AAA-type%2C core (InterPro:IPR003959)%2C ATPase%2C AAA+ type%2C core (InterP…	*****	gene:2178066.UniProt:Q9FLD5	NA	'35.1'	'not assigned.annotated'	'AAA-ATPase ASD. mitochondrial OS=Arabidopsis thaliana (sp|q9fld5|asd_arath : 530.0)'
Vitvi11g00050	1503.52	-1.0749	0.291306	-3.68994	0.000224308	0.00931572	1503.52	-2.59539	0.326263	-7.9549	1.79279e-15	1.84258e-13	1503.52	-1.06022	0.29023	-3.65304	0.000259152	0.001645	1503.52	-1.88678	0.291005	-6.48369	8.95047e-11	3.01604e-09	VIT_11s0016g00710	AT1G19180.1	2.9e-14	79	1-to-many	AT1G19180.3	AT1G19180.1	jasmonate-zim-domain protein 1	JAZ1 is a nuclear-localized protein involved in jasmonate signaling. JAZ1 transcript levels rise in response to a jasmonate stimulus. JAZ1 can interact with the COI1 F-box subunit of an SCF E3 ubiquitin ligase in a yeast-two-hybrid assay only in the presence of jasmonate-isoleucine (JA-ILE) or coronatine. Application of jasmonate methyl ester to Arabidopsis roots reduces the levels of a JAZ1:GUS …	"JAZ1"	AtJAZ1.TIFY10A	jasmonate-zim-domain protein 1	jasmonate-zim-domain protein 1 (JAZ1)%3B CONTAINS InterPro DOMAIN/s: Tify (InterPro:IPR010399)%2C CCT domain-like (InterPro:IPR018467)%3B BEST Arabidopsis thaliana protein match is: TIFY domain/Divergent CCT motif family protein (TAIR:AT1G74950.1)%3B Has 439 Blast hits to 432 proteins in 29 species: Archae - 0%3B Bacteria - 0%3B Metazoa - 0%3B Fungi - 0%3B Plants - 439%3B Viruses - 0%3B Other Euk…	****	PMID:17637677.PMID:17722694.PMID:18223147.PMID:18547396.gene:2202179.UniProt:Q9LMA8	NA	'15.7.48'	'RNA biosynthesis.transcriptional activation.TIFY transcription factor'	'RNA biosynthesis.transcriptional activation.TIFY transcription factor (original description: none)'
Vitvi03g00262	9881.49	-1.09169	0.252082	-4.33068	1.48648e-05	0.00129255	9881.49	-2.13583	0.281504	-7.58722	3.26853e-14	2.68072e-12	9881.49	-2.04318	0.251977	-8.1086	5.12062e-16	5.07331e-14	9881.49	-2.35961	0.25178	-9.37171	7.13634e-21	1.36145e-18	VIT_03s0038g04100	AT1G76490.1	1.6e-92	339	1-to-1	NA	AT1G76490.1	hydroxy methylglutaryl CoA reductase 1	Encodes a 3-hydroxy-3-methylglutaryl coenzyme A reductase%2C which is involved in melavonate biosynthesis and performs the first committed step in isoprenoid biosynthesis. Expression is activated in dark in leaf tissue but not controlled by light in the root (confine	"HMG1"	AtHMGR1.HMGR1.3-HYDROXY-3-METHYLGLUTARYL COA REDUCTASE 1.MAD3.miRNA action deficient 3	hydroxy methylglutaryl CoA reductase 1	hydroxy methylglutaryl CoA reductase 1 (HMG1)%3B CONTAINS InterPro DOMAIN/s: Hydroxymethylglutaryl-CoA reductase%2C class I%2C catalytic (InterPro:IPR004554)%2C Hydroxymethylglutaryl-CoA reductase%2C class I/II%2C substrate-binding (InterPro:IPR009029)%2C Hydroxymethylglutaryl-CoA reductase%2C class I/II%2C NAD/NADP-binding (InterPro:IPR009023)%2C Hydroxymethylglutaryl-CoA reductase%2C class I/II…	****	PMID:8302869.PMID:2491679.gene:3687654.UniProt:P14891-2	NA	'50.1.1'	'Enzyme classification.EC_1 oxidoreductases.EC_1.1 oxidoreductase acting on CH-OH group of donor'	'3-hydroxy-3-methylglutaryl-coenzyme A reductase OS=Camptotheca acuminata (sp|p48021|hmdh_camac : 379.0) & Enzyme classification.EC_1 oxidoreductases.EC_1.1 oxidoreductase acting on CH-OH group of donor(50.1.1 : 189.1) (original description: none)'
Vitvi05g02277	1425.21	-1.09585	0.240989	-4.54729	5.43419e-06	0.000622511	1425.21	-1.5854	0.269764	-5.877	4.17776e-09	1.32443e-07	1425.21	-2.26508	0.240824	-9.40554	5.17655e-21	1.66525e-18	1425.21	-1.15652	0.239369	-4.83151	1.35499e-06	1.85458e-05		AT3G59880.1	1.9e-12	70.9	1-to-1	NA	AT3G59880.1	hypothetical protein	NA	NA	NA	NA	unknown protein%3B FUNCTIONS IN: molecular_function unknown%3B INVOLVED IN: biological_process unknown%3B LOCATED IN: plasma membrane%3B BEST Arabidopsis thaliana protein match is: unknown protein (TAIR:AT2G44010.1)%3B Has 20 Blast hits to 20 proteins in 7 species: Archae - 0%3B Bacteria - 0%3B Metazoa - 0%3B Fungi - 0%3B Plants - 20%3B Viruses - 0%3B Other Eukaryotes - 0 (source: NCBI BLink).	*****	PMID:17317660.gene:2080466.UniProt:Q5BPM7	NA	'35.2'	'not assigned.not annotated'	' no hits & (original description: none)'
Vitvi01g00465	1598.35	-1.09727	0.231402	-4.74183	2.11799e-06	0.000306551	1598.35	-1.84162	0.259265	-7.10326	1.21852e-12	7.34143e-11	1598.35	-1.54364	0.23171	-6.66196	2.70203e-11	1.01159e-09	1598.35	-1.64874	0.23186	-7.11095	1.15249e-12	5.76269e-11	VIT_01s0011g05470	AT1G14870.1	1e-24	112.8	1-to-many	AT1G14870.2	AT1G14870.1	PLANT CADMIUM RESISTANCE 2	PCR2 encodes a membrane protein involved in zinc transport and detoxification.	"PCR2"	AtPCR2	PLANT CADMIUM RESISTANCE 2	PLANT CADMIUM RESISTANCE 2 (PCR2)%3B FUNCTIONS IN: molecular_function unknown%3B INVOLVED IN: response to oxidative stress%3B LOCATED IN: plasma membrane%3B EXPRESSED IN: callus%3B CONTAINS InterPro DOMAIN/s: Protein of unknown function Cys-rich (InterPro:IPR006461)%3B BEST Arabidopsis thaliana protein match is: PLAC8 family protein (TAIR:AT5G35525.1)%3B Has 803 Blast hits to 802 proteins in 112 …	****	PMID:16618929.PMID:17317660.gene:2006771.UniProt:Q9LQU4	NA	'35.1'	'not assigned.annotated'	'Cell number regulator 2 OS=Zea mays (sp|b6tyv8|cnr2_maize : 124.0)'
Vitvi08g02220	3926.09	-1.10194	0.294064	-3.74726	0.000178776	0.00781253	3926.09	-1.44721	0.32891	-4.40002	1.08239e-05	0.000144842	3926.09	-1.28151	0.294408	-4.35284	1.34387e-05	0.000130515	3926.09	-1.229	0.294145	-4.1782	2.93831e-05	0.000278185	VIT_08s0007g01230	AT1G34300.1	2.2e-106	385.2	1-to-1	NA	AT1G34300.1	lectin protein kinase family protein	NA	NA	NA	NA	lectin protein kinase family protein%3B FUNCTIONS IN: in 6 functions%3B INVOLVED IN: protein amino acid phosphorylation%2C recognition of pollen%3B LOCATED IN: plasma membrane%3B EXPRESSED IN: 23 plant structures%3B EXPRESSED DURING: 13 growth stages%3B CONTAINS InterPro DOMAIN/s: Curculin-like (mannose-binding) lectin (InterPro:IPR001480)%2C Protein kinase%2C ATP binding site (InterPro:IPR017441…	*****	PMID:17317660.PMID:17644812.PMID:21075962.gene:2026154.UniProt:Q9XID3	NA	'18.8.1.24.2'	'Protein modification.phosphorylation.TKL kinase superfamily.G-Lectin kinase families.SD-2 kinase'	'Protein modification.phosphorylation.TKL kinase superfamily.G-Lectin kinase families.SD-2 kinase (original description: none)'
Vitvi07g02634	139.99	-1.10285	0.252663	-4.36492	1.27167e-05	0.00116466	139.99	-1.9128	0.292214	-6.54587	5.91481e-11	2.69505e-09	139.99	-1.96659	0.273084	-7.2014	5.95984e-13	3.11838e-11	139.99	-1.36372	0.253467	-5.38027	7.43734e-08	1.35827e-06	VIT_07s0129g00200	AT4G37630.1	2.3e-24	112.5	1-to-many	AT4G37630.3	AT4G37630.1	cyclin d5%3B1	core cell cycle genes%3B a quantitative trait gene for endoreduplication.	"CYCD5%3B1"	NA	cyclin d5%3B1	cyclin d5%3B1 (CYCD5%3B1)%3B FUNCTIONS IN: cyclin-dependent protein kinase activity%3B INVOLVED IN: regulation of cell cycle%3B LOCATED IN: nucleus%3B EXPRESSED IN: 24 plant structures%3B EXPRESSED DURING: 13 growth stages%3B CONTAINS InterPro DOMAIN/s: Cyclin D (InterPro:IPR015451)%2C Cyclin-like (InterPro:IPR011028)%2C Cyclin-related (InterPro:IPR013763)%2C Cyclin%2C N-terminal (InterPro:IPR006…	*****	PMID:15686519.gene:2120080.UniProt:Q2V3B2	NA	'13.1.1.4'	'Cell cycle.regulation.cyclins.CYCD-type cyclin'	'Cell cycle.regulation.cyclins.CYCD-type cyclin (original description: none)'
Vitvi19g01784	757.518	-1.10325	0.291249	-3.78798	0.000151878	0.00687461	757.518	-1.95699	0.324678	-6.0275	1.66513e-09	5.69798e-08	757.518	-1.5225	0.289757	-5.25439	1.48516e-07	2.37562e-06	757.518	-1.94349	0.291584	-6.66528	2.64168e-11	1.01892e-09	VIT_19s0014g02240	AT3G15210.1	1.7e-38	158.3	1-to-1	NA	AT3G15210.1	ethylene responsive element binding factor 4	Encodes a member of the ERF (ethylene response factor) subfamily B-1 of ERF/AP2 transcription factor family (ATERF-4). The protein contains one AP2 domain. Acts as a negative regulator of JA-responsive defense gene expression and resistance to the necrotrophic fungal pathogen Fusarium oxysporum and antagonizes JA inhibition of root elongation.	"ERF4"	ATERF-4.ETHYLENE RESPONSIVE ELEMENT BINDING FACTOR 4.ATERF4.ETHYLENE RESPONSIVE ELEMENT BINDING FACTOR 4.RAP2.5.RELATED TO AP2 5	ethylene responsive element binding factor 4	ethylene responsive element binding factor 4 (ERF4)%3B CONTAINS InterPro DOMAIN/s: DNA-binding%2C integrase-type (InterPro:IPR016177)%2C Pathogenesis-related transcriptional factor/ERF%2C DNA-binding (InterPro:IPR001471)%3B BEST Arabidopsis thaliana protein match is: ethylene response factor 8 (TAIR:AT1G53170.1)%3B Has 6170 Blast hits to 5786 proteins in 253 species: Archae - 0%3B Bacteria - 0%3B…	*****	PMID:11118137.PMID:11487705.PMID:16021341.PMID:16183832.PMID:16280546.PMID:16442528.PMID:16429262.PMID:16407444.PMID:17189334.PMID:17722694.gene:2087064.UniProt:O80340	VviERF11	'15.7.7.1'	'RNA biosynthesis.transcriptional activation.AP2/ERF superfamily.ERF-type transcription factor'	'RNA biosynthesis.transcriptional activation.AP2/ERF superfamily.ERF-type transcription factor (original description: none)'
Vitvi15g00928	91.5575	-1.10415	0.278696	-3.96184	7.43754e-05	0.00400385	91.5575	-1.9094	0.320613	-5.95546	2.59336e-09	8.58543e-08	91.5575	-1.53117	0.288495	-5.30746	1.11166e-07	1.82639e-06	91.5575	-1.5893	0.281799	-5.63983	1.70217e-08	3.57153e-07	VIT_15s0046g00070	AT2G46600.1	8.1e-42	168.7	1-to-1	NA	AT2G46600.1	Calcium-binding EF-hand family protein	NA	NA	NA	NA	Calcium-binding EF-hand family protein%3B FUNCTIONS IN: calcium ion binding%3B LOCATED IN: cellular_component unknown%3B EXPRESSED IN: 24 plant structures%3B EXPRESSED DURING: 14 growth stages%3B CONTAINS InterPro DOMAIN/s: EF-Hand 1%2C calcium-binding site (InterPro:IPR018247)%2C EF-HAND 2 (InterPro:IPR018249)%2C EF-hand-like domain (InterPro:IPR011992)%3B BEST Arabidopsis thaliana protein match…	*****	gene:2039968.UniProt:Q9ZPX9	NA	'35.1'	'not assigned.annotated'	'Calcium-binding protein KIC OS=Arabidopsis thaliana (sp|q9zpx9|kic_arath : 164.0)'
Vitvi07g00208	805.834	-1.10653	0.235534	-4.69796	2.62774e-06	0.000348984	805.834	-1.22869	0.26588	-4.62124	3.81446e-06	5.82128e-05	805.834	-1.04261	0.23521	-4.43267	9.3073e-06	9.45994e-05	805.834	-1.06534	0.237992	-4.47636	7.59267e-06	8.51466e-05	VIT_07s0104g00840	AT2G48010.1	3.6e-208	723.4	1-to-1	NA	AT2G48010.1	receptor-like kinase in in flowers 3	receptor-like serine/threonine kinase (RKF3)	"RKF3"	NA	receptor-like kinase in in flowers 3	receptor-like kinase in in flowers 3 (RKF3)%3B FUNCTIONS IN: receptor signaling protein serine/threonine kinase activity%2C kinase activity%3B INVOLVED IN: protein amino acid phosphorylation%3B LOCATED IN: plasma membrane%3B EXPRESSED IN: 22 plant structures%3B EXPRESSED DURING: 13 growth stages%3B CONTAINS InterPro DOMAIN/s: Protein kinase%2C ATP binding site (InterPro:IPR017441)%2C Protein kina…	*****	PMID:14506206.PMID:17317660.gene:2066389.UniProt:P93050	NA	'18.8.1.23'	'Protein modification.phosphorylation.TKL kinase superfamily.RKF3 kinase'	'Protein modification.phosphorylation.TKL kinase superfamily.RKF3 kinase (original description: none)'
Vitvi09g01345	1056.55	-1.10679	0.256857	-4.30896	1.64027e-05	0.00137187	1056.55	-1.27215	0.289359	-4.39644	1.10041e-05	0.000146943	1056.55	-1.11468	0.258531	-4.31159	1.62085e-05	0.000153079	1056.55	-1.39996	0.257649	-5.43357	5.52372e-08	1.03941e-06	VIT_09s0054g00380	AT3G07510.1	4e-36	149.8	1-to-many	AT3G07510.2.AT3G07510.3	AT3G07510.1	maternal effect embryo arrest protein	NA	NA	NA	NA	unknown protein%3B BEST Arabidopsis thaliana protein match is: unknown protein (TAIR:AT2G01580.1)%3B Has 133 Blast hits to 133 proteins in 14 species: Archae - 0%3B Bacteria - 4%3B Metazoa - 0%3B Fungi - 0%3B Plants - 129%3B Viruses - 0%3B Other Eukaryotes - 0 (source: NCBI BLink).	****	gene:2079665.UniProt:Q94K16	NA	'35.2'	'not assigned.not annotated'	' no hits & (original description: none)'
Vitvi08g00916	5551.5	-1.11219	0.254853	-4.36403	1.27688e-05	0.00116466	5551.5	-2.7699	0.284923	-9.72155	2.44037e-22	7.47548e-20	5551.5	-2.25825	0.254653	-8.86795	7.45027e-19	1.45964e-16	5551.5	-2.74216	0.255061	-10.751	5.86351e-27	2.55124e-24	VIT_08s0040g00540	AT3G56880.1	2e-35	148.3	1-to-1	NA	AT3G56880.1	VQ motif-containing protein	NA	NA	NA	NA	VQ motif-containing protein%3B CONTAINS InterPro DOMAIN/s: VQ (InterPro:IPR008889)%3B BEST Arabidopsis thaliana protein match is: calmodulin (CAM)-binding protein of 25 kDa (TAIR:AT2G41010.1)%3B Has 109 Blast hits to 109 proteins in 12 species: Archae - 0%3B Bacteria - 0%3B Metazoa - 0%3B Fungi - 3%3B Plants - 106%3B Viruses - 0%3B Other Eukaryotes - 0 (source: NCBI BLink).	*****	gene:2103589.UniProt:Q9LES0	NA	'35.1'	'not assigned.annotated'	'Calmodulin-binding protein 25 OS=Arabidopsis thaliana (sp|o80683|cab25_arath : 144.0)'
Vitvi16g01111	272.962	-1.1148	0.275064	-4.05287	5.05942e-05	0.00303452	272.962	-2.84284	0.345255	-8.23403	1.81025e-16	2.22346e-14	272.962	-1.54536	0.280202	-5.51518	3.48432e-08	6.48043e-07	272.962	-2.81514	0.289522	-9.7234	2.39636e-22	5.71462e-20	VIT_16s0050g01230	ATCG00480.1	1.6e-16	88.6	1-to-1	NA	ATCG00480.1	ATP synthase subunit beta	chloroplast-encoded gene for beta subunit of ATP synthase	"PB"	ATPB.ATP synthase subunit beta	ATP synthase subunit beta	ATP synthase subunit beta (PB)%3B FUNCTIONS IN: hydrogen ion transmembrane transporter activity%2C zinc ion binding%3B INVOLVED IN: defense response to fungus%2C incompatible interaction%2C response to cold%2C ATP synthesis coupled proton transport%3B LOCATED IN: in 11 components%3B EXPRESSED IN: 24 plant structures%3B EXPRESSED DURING: 14 growth stages%3B CONTAINS InterPro DOMAIN/s: ATPase%2C F1…	*****	PMID:11719511.PMID:11826309.PMID:14729914.PMID:15322131.PMID:16287169.PMID:16414959.PMID:16461379.PMID:16648217.PMID:16923014.PMID:17118361.PMID:17333279.PMID:17432890.PMID:18431481.PMID:18633119.PMID:16207701.gene:1009022892	NA	'18.7.4.1.3.2'	'Protein modification.lipidation.Glycophosphatidylinositol (GPI)-anchor addition.GPI pre-assembly.mannosyltransferase-I complex.PIG-X component'	'Protein modification.lipidation.Glycophosphatidylinositol (GPI)-anchor addition.GPI pre-assembly.mannosyltransferase-I complex.PIG-X component (original description: none)'
Vitvi10g00444	910.424	-1.11801	0.274475	-4.07326	4.63605e-05	0.00284411	910.424	-3.00869	0.309415	-9.72381	2.38681e-22	7.40056e-20	910.424	-2.34939	0.272159	-8.63241	6.00724e-18	9.20768e-16	910.424	-2.58561	0.274723	-9.4117	4.88186e-21	9.63729e-19	VIT_00s0652g00010	AT3G21270.1	9.5e-23	106.7	1-to-1	NA	AT3G21270.1	DOF zinc finger protein 2	Encodes Dof zinc finger protein adof2.	"DOF2"	ADOF2.DOF zinc finger protein 2	DOF zinc finger protein 2	DOF zinc finger protein 2 (DOF2)%3B CONTAINS InterPro DOMAIN/s: Zinc finger%2C Dof-type (InterPro:IPR003851)%3B BEST Arabidopsis thaliana protein match is: DOF zinc finger protein 1 (TAIR:AT1G51700.1)%3B Has 1111 Blast hits to 1102 proteins in 62 species: Archae - 0%3B Bacteria - 5%3B Metazoa - 2%3B Fungi - 4%3B Plants - 1092%3B Viruses - 0%3B Other Eukaryotes - 8 (source: NCBI BLink).	*****	PMID:11118137.PMID:16280546.gene:2094745.UniProt:Q94AR6	NA	'15.7.1.5'	'RNA biosynthesis.transcriptional activation.C2C2 superfamily.DOF transcription factor'	'RNA biosynthesis.transcriptional activation.C2C2 superfamily.DOF transcription factor (original description: none)'
Vitvi15g00362	285.78	-1.12303	0.248542	-4.51849	6.22816e-06	0.00070019	285.78	-1.50213	0.282839	-5.31092	1.09075e-07	2.53437e-06	285.78	-1.73705	0.251134	-6.91682	4.61884e-12	2.01935e-10	285.78	-1.26538	0.252549	-5.01043	5.43072e-07	8.03145e-06	VIT_15s0045g01200	AT2G35930.1	9.8e-55	212.6	1-to-1	NA	AT2G35930.1	plant U-box 23	Encodes a cytoplasmically localized U-box domain containing E3 ubiquitin ligase that is involved in the response to water stress and acts as a negative regulator of PAMP-triggered immunity.	"PUB23"	AtPUB23	plant U-box 23	plant U-box 23 (PUB23)%3B CONTAINS InterPro DOMAIN/s: U box domain (InterPro:IPR003613)%2C Armadillo-like helical (InterPro:IPR011989)%2C Armadillo-type fold (InterPro:IPR016024)%3B BEST Arabidopsis thaliana protein match is: plant U-box 22 (TAIR:AT3G52450.1)%3B Has 2501 Blast hits to 2466 proteins in 187 species: Archae - 0%3B Bacteria - 34%3B Metazoa - 243%3B Fungi - 89%3B Plants - 1910%3B Viru…	*****	PMID:17722694.gene:2039264.UniProt:Q84TG3	NA	'35.1'	'not assigned.annotated'	'E3 ubiquitin-protein ligase PUB23 OS=Arabidopsis thaliana (sp|q84tg3|pub23_arath : 195.0)'
Vitvi14g03027	981.306	-1.12321	0.167542	-6.70404	2.0273e-11	4.45471e-08	981.306	-1.37874	0.19202	-7.18019	6.96167e-13	4.39207e-11	981.306	-1.38962	0.169359	-8.2052	2.30214e-16	2.52046e-14	981.306	-1.46182	0.170558	-8.57083	1.02742e-17	1.25523e-15	VIT_14s0066g01570	AT1G23850.1	4.2e-28	125.9	1-to-1	NA	AT1G23850.1	transmembrane protein	NA	NA	NA	NA	unknown protein%3B BEST Arabidopsis thaliana protein match is: unknown protein (TAIR:AT1G23840.1)%3B Has 47 Blast hits to 40 proteins in 5 species: Archae - 0%3B Bacteria - 0%3B Metazoa - 0%3B Fungi - 0%3B Plants - 47%3B Viruses - 0%3B Other Eukaryotes - 0 (source: NCBI BLink).	*****	gene:2199831.UniProt:Q9LRA9	NA	'35.2'	'not assigned.not annotated'	' no hits & (original description: none)'
Vitvi15g01003	1775.78	-1.12357	0.265171	-4.23714	2.26388e-05	0.00165318	1775.78	-3.12629	0.299575	-10.4357	1.70287e-25	9.21181e-23	1775.78	-1.99236	0.265182	-7.5132	5.76996e-14	3.69405e-12	1775.78	-2.99663	0.267794	-11.1901	4.56111e-29	2.97685e-26	VIT_15s0046g01140	AT4G23810.1	5.3e-14	78.2	1-to-1	NA	AT4G23810.1	WRKY family transcription factor	member of WRKY Transcription Factor%3B Group III	"WRKY53"	NA	NA	WRKY53%3B FUNCTIONS IN: protein binding%2C DNA binding%2C transcription activator activity%2C sequence-specific DNA binding transcription factor activity%3B INVOLVED IN: in 6 processes%3B LOCATED IN: nucleus%2C chloroplast%3B EXPRESSED IN: 20 plant structures%3B EXPRESSED DURING: 12 growth stages%3B CONTAINS InterPro DOMAIN/s: DNA-binding WRKY (InterPro:IPR003657)%3B BEST Arabidopsis thaliana pro…	****	PMID:11118137.PMID:17096590.PMID:17722694.PMID:17977154.PMID:18183400.PMID:18431481.gene:3439784.UniProt:Q9SUP6	"WRKY53"	'15.7.22'	'RNA biosynthesis.transcriptional activation.WRKY transcription factor'	'RNA biosynthesis.transcriptional activation.WRKY transcription factor (original description: none)'
Vitvi13g00289	4957.64	-1.12452	0.230407	-4.88057	1.05781e-06	0.000179488	4957.64	-2.3079	0.258223	-8.93761	3.97666e-19	7.92361e-17	4957.64	-1.80376	0.230656	-7.82013	5.27708e-15	4.20504e-13	4957.64	-1.82101	0.230497	-7.90035	2.78125e-15	2.31434e-13	VIT_13s0019g01100	AT2G39650.1	4.1e-66	251.5	1-to-many	AT2G39650.2	AT2G39650.1	cruciferin (DUF506)	NA	NA	NA	NA	Protein of unknown function (DUF506) %3B CONTAINS InterPro DOMAIN/s: Protein of unknown function DUF506%2C plant (InterPro:IPR006502)%3B BEST Arabidopsis thaliana protein match is: Protein of unknown function (DUF506) (TAIR:AT2G38820.2)%3B Has 395 Blast hits to 393 proteins in 24 species: Archae - 0%3B Bacteria - 0%3B Metazoa - 0%3B Fungi - 0%3B Plants - 393%3B Viruses - 0%3B Other Eukaryotes - 2…	****	gene:3436188.UniProt:O48813	NA	'35.2'	'not assigned.not annotated'	' no hits & (original description: none)'
Vitvi17g01104	3179.5	-1.13087	0.210994	-5.35974	8.33426e-08	2.51809e-05	3179.5	-1.98111	0.235792	-8.40193	4.39186e-17	6.34448e-15	3179.5	-1.80595	0.21123	-8.54969	1.23422e-17	1.79665e-15	3179.5	-1.77234	0.21024	-8.43011	3.45347e-17	3.80664e-15	VIT_17s0119g00110	AT5G08350.1	1.1e-30	133.3	1-to-many	AT5G23370.1	AT5G08350.1	GRAM domain-containing protein / ABA-responsive protein-like protein	NA	NA	NA	NA	GRAM domain-containing protein / ABA-responsive protein-related%3B CONTAINS InterPro DOMAIN/s: GRAM (InterPro:IPR004182)%3B BEST Arabidopsis thaliana protein match is: GRAM domain-containing protein / ABA-responsive protein-related (TAIR:AT5G23370.1)%3B Has 358 Blast hits to 358 proteins in 24 species: Archae - 0%3B Bacteria - 0%3B Metazoa - 0%3B Fungi - 0%3B Plants - 358%3B Viruses - 0%3B Other …	****	gene:2150822.UniProt:Q9FTA0	NA	'35.1'	'not assigned.annotated'	'GEM-like protein 4 OS=Arabidopsis thaliana (sp|q9fta0|geml4_arath : 132.0)'
Vitvi12g00066	2590.67	-1.13302	0.26186	-4.32684	1.51266e-05	0.0013058	2590.67	-2.13949	0.293123	-7.29895	2.90011e-13	1.99285e-11	2590.67	-1.72527	0.261938	-6.58656	4.50133e-11	1.62004e-09	2590.67	-1.90521	0.262057	-7.27021	3.58927e-13	1.96941e-11	VIT_12s0028g00610	AT3G59080.1	2.8e-200	696.8	1-to-1	NA	AT3G59080.1	Eukaryotic aspartyl protease family protein	NA	NA	NA	NA	Eukaryotic aspartyl protease family protein%3B FUNCTIONS IN: DNA binding%2C aspartic-type endopeptidase activity%3B INVOLVED IN: proteolysis%3B LOCATED IN: endomembrane system%3B EXPRESSED IN: 21 plant structures%3B EXPRESSED DURING: 11 growth stages%3B CONTAINS InterPro DOMAIN/s: Peptidase aspartic (InterPro:IPR021109)%2C Peptidase aspartic%2C catalytic (InterPro:IPR009007)%2C Peptidase A1 (Inte…	*****	gene:2077699.UniProt:Q9LYS8	NA	'19.5.3.1'	'Protein degradation.peptidase families.aspartic-type peptidase activities.pepsin-type protease'	'Protein degradation.peptidase families.aspartic-type peptidase activities.pepsin-type protease (original description: none)'
Vitvi01g01803	723.177	-1.1347	0.27932	-4.06236	4.85783e-05	0.00293547	723.177	-2.34074	0.311425	-7.51623	5.63789e-14	4.45166e-12	723.177	-1.76878	0.27733	-6.37789	1.79543e-10	5.66386e-09	723.177	-2.02787	0.278087	-7.29222	3.04894e-13	1.69544e-11	VIT_01s0150g00440	AT5G47910.1	5.4e-120	431	1-to-1	NA	AT5G47910.1	respiratory burst oxidase homologue D	NADPH/respiratory burst oxidase protein D (RbohD).Interacts with AtrbohF gene to fine tune the spatial control of ROI production and hypersensitive response to cell in and around infection site.	"RBOHD"	ATRBOHD	respiratory burst oxidase homologue D	respiratory burst oxidase homologue D (RBOHD)%3B FUNCTIONS IN: NAD(P)H oxidase activity%3B INVOLVED IN: oxygen and reactive oxygen species metabolic process%2C defense response to fungus%2C response to heat%2C defense response%2C negative regulation of programmed cell death%3B LOCATED IN: plasma membrane%3B EXPRESSED IN: 24 plant structures%3B EXPRESSED DURING: 13 growth stages%3B CONTAINS InterP…	****	PMID:9628030.PMID:17317660.PMID:18467450.gene:2160916.UniProt:Q9FIJ0	NA	'10.1.1'	'Redox homeostasis.reactive oxygen generation.Rboh NADPH-oxidase'	'Redox homeostasis.reactive oxygen generation.Rboh NADPH-oxidase (original description: none)'
Vitvi08g01377	16411.6	-1.13559	0.303202	-3.74531	0.000180168	0.00783537	16411.6	-2.44426	0.338965	-7.21094	5.55654e-13	3.59479e-11	16411.6	-1.66391	0.303047	-5.49059	4.00583e-08	7.33004e-07	16411.6	-2.31174	0.30313	-7.62623	2.41717e-14	1.65146e-12	VIT_08s0007g02360	AT2G35980.1	7.6e-47	186	1-to-1	NA	AT2G35980.1	Late embryogenesis abundant (LEA) hydroxyproline-rich glycoprotein family	Encodes a protein whose sequence is similar to tobacco hairpin-induced gene (HIN1) and Arabidopsis non-race specific disease resistance gene (NDR1). Expression of this gene is induced by cucumber mosaic virus%2C spermine and during senescence. The gene product is localized to the chloroplast.	"YLS9"	ATNHL10.ARABIDOPSIS NDR1/HIN1-LIKE 10.NHL10.NDR1/HIN1-LIKE	YELLOW-LEAF-SPECIFIC GENE 9	YELLOW-LEAF-SPECIFIC GENE 9 (YLS9)%3B FUNCTIONS IN: molecular_function unknown%3B INVOLVED IN: defense response to virus%2C leaf senescence%2C response to other organism%3B LOCATED IN: chloroplast%3B EXPRESSED IN: 7 plant structures%3B EXPRESSED DURING: 4 anthesis%2C 4 leaf senescence stage%2C petal differentiation and expansion stage%3B CONTAINS InterPro DOMAIN/s: Late embryogenesis abundant pro…	*****	gene:2039184.UniProt:Q9SJ52	NA	'35.1'	'not assigned.annotated'	'NDR1/HIN1-like protein 3 OS=Arabidopsis thaliana (sp|q9fnh6|nhl3_arath : 189.0)'
Vitvi16g00370	88.4802	-1.14574	0.286097	-4.00472	6.20897e-05	0.00353955	88.4802	-1.13623	0.318835	-3.56369	0.000365673	0.00300882	88.4802	-1.26189	0.293029	-4.30637	1.65956e-05	0.000156226	88.4802	-1.23587	0.292594	-4.22383	2.40189e-05	0.000232783	VIT_16s0013g01070	AT5G51190.1	3.4e-39	160.6	1-to-1	NA	AT5G51190.1	Integrase-type DNA-binding superfamily protein	encodes a member of the ERF (ethylene response factor) subfamily B-3 of ERF/AP2 transcription factor family. The protein contains one AP2 domain. There are 18 members in this subfamily including ATERF-1%2C ATERF-2%2C AND ATERF-5.	NA	ERF105.ethylene response factor 105	NA	Integrase-type DNA-binding superfamily protein%3B CONTAINS InterPro DOMAIN/s: DNA-binding%2C integrase-type (InterPro:IPR016177)%2C Pathogenesis-related transcriptional factor/ERF%2C DNA-binding (InterPro:IPR001471)%3B BEST Arabidopsis thaliana protein match is: ethylene response factor 104 (TAIR:AT5G61600.1)%3B Has 30201 Blast hits to 17322 proteins in 780 species: Archae - 12%3B Bacteria - 1396…	*****	PMID:11118137.PMID:16280546.PMID:16407444.PMID:17722694.gene:2176186.UniProt:Q8VY90	VviERF6L9	'15.7.7.1'	'RNA biosynthesis.transcriptional activation.AP2/ERF superfamily.ERF-type transcription factor'	'RNA biosynthesis.transcriptional activation.AP2/ERF superfamily.ERF-type transcription factor (original description: none)'
Vitvi09g00470	2319.47	-1.14633	0.264851	-4.3282	1.50336e-05	0.00130242	2319.47	-4.50929	0.303593	-14.8531	6.64368e-50	8.44577e-46	2319.47	-1.10476	0.264961	-4.16952	3.05247e-05	0.00026557	2319.47	-4.51189	0.272197	-16.5758	1.04273e-61	2.58608e-57	VIT_09s0002g05490	AT1G15520.1	4.5e-153	541.6	1-to-1	NA	AT1G15520.1	pleiotropic drug resistance 12	ABC transporter family involved in ABA transport and resistance to lead. Localizes to plasma membrane. Upregulated by lead. Expressed in leaves%2C flowers%2C stomata and roots.	"ABCG40"	ATABCG40.Arabidopsis thaliana ATP-binding cassette G40.ATPDR12.PLEIOTROPIC DRUG RESISTANCE 12.PDR12.pleiotropic drug resistance 12	ATP-binding cassette G40	pleiotropic drug resistance 12 (PDR12)%3B CONTAINS InterPro DOMAIN/s: ATPase%2C AAA+ type%2C core (InterPro:IPR003593)%2C ABC transporter-like (InterPro:IPR003439)%2C Plant PDR ABC transporter associated (InterPro:IPR013581)%2C ABC-2 type transporter (InterPro:IPR013525)%3B BEST Arabidopsis thaliana protein match is: pleiotropic drug resistance 11 (TAIR:AT1G66950.1)%3B Has 377983 Blast hits to 27…	****	PMID:12430018.PMID:16506311.PMID:17164256.PMID:18334669.gene:2196592.UniProt:Q9M9E1	NA	'35.1'	'not assigned.annotated'	'Pleiotropic drug resistance protein 1 OS=Nicotiana tabacum (sp|q76cu2|pdr1_tobac : 279.0)'
Vitvi16g00717	2994.83	-1.15276	0.311242	-3.70374	0.000212447	0.00893052	2994.83	-1.83867	0.34866	-5.27352	1.33829e-07	3.03533e-06	2994.83	-2.37178	0.310982	-7.62676	2.40729e-14	1.67271e-12	2994.83	-2.20093	0.311281	-7.07054	1.54333e-12	7.59448e-11	VIT_16s0022g00700	AT2G45220.1	7.7e-151	532.7	1-to-1	NA	AT2G45220.1	Plant invertase/pectin methylesterase inhibitor superfamily	NA	NA	AtPME17.PME17.pectin methylesterase 17	NA	Plant invertase/pectin methylesterase inhibitor superfamily%3B FUNCTIONS IN: enzyme inhibitor activity%2C pectinesterase activity%3B INVOLVED IN: cell wall modification%3B LOCATED IN: membrane%2C plant-type cell wall%3B EXPRESSED IN: 9 plant structures%3B EXPRESSED DURING: 4 anthesis%2C C globular stage%2C petal differentiation and expansion stage%3B CONTAINS InterPro DOMAIN/s: Carbohydrate-bindi…	****	PMID:9767082.PMID:16622707.PMID:17432890.gene:2050940.UniProt:O22149	NA	'21.3.1.2.1'	'Cell wall.pectin.homogalacturonan.modification and degradation.pectin methylesterase'	'Cell wall.pectin.homogalacturonan.modification and degradation.pectin methylesterase (original description: none)'
Vitvi10g00570	1203.36	-1.15672	0.236309	-4.89493	9.83397e-07	0.000168579	1203.36	-1.89724	0.263953	-7.18779	6.58471e-13	4.18541e-11	1203.36	-1.94534	0.236693	-8.2188	2.05545e-16	2.2791e-14	1203.36	-1.63177	0.235746	-6.92174	4.46136e-12	1.99362e-10	VIT_10s0003g01130	AT2G27430.1	2.6e-90	331.6	1-to-1	NA	AT2G27430.1	ARM repeat superfamily protein	NA	NA	NA	NA	ARM repeat superfamily protein%3B FUNCTIONS IN: binding%3B INVOLVED IN: biological_process unknown%3B LOCATED IN: cellular_component unknown%3B CONTAINS InterPro DOMAIN/s: Armadillo-like helical (InterPro:IPR011989)%2C Armadillo-type fold (InterPro:IPR016024)%3B BEST Arabidopsis thaliana protein match is: ARM repeat superfamily protein (TAIR:AT4G31890.2)%3B Has 565 Blast hits to 559 proteins in 3…	****	gene:2038597.UniProt:Q8GUS7	NA	'35.1'	'not assigned.annotated'	'U-box domain-containing protein 7 OS=Arabidopsis thaliana (sp|q9cag5|pub7_arath : 92.0)'
Vitvi03g00214	221.455	-1.16412	0.264434	-4.40231	1.07104e-05	0.00102731	221.455	-2.14881	0.29391	-7.31112	2.64918e-13	1.83529e-11	221.455	-1.04243	0.286534	-3.63805	0.000274712	0.00172903	221.455	-2.47832	0.265778	-9.32479	1.11201e-20	2.05814e-18	VIT_03s0038g03540	AT1G47670.1	7.7e-55	216.5	1-to-1	NA	AT1G47670.1	Transmembrane amino acid transporter family protein	NA	NA	NA	NA	Transmembrane amino acid transporter family protein%3B FUNCTIONS IN: amino acid transmembrane transporter activity%3B INVOLVED IN: amino acid transport%3B LOCATED IN: plasma membrane%2C membrane%3B EXPRESSED IN: 20 plant structures%3B EXPRESSED DURING: 13 growth stages%3B CONTAINS InterPro DOMAIN/s: Amino acid transporter%2C transmembrane (InterPro:IPR013057)%3B BEST Arabidopsis thaliana protein …	****	PMID:14506206.PMID:17317660.gene:2015382.UniProt:Q9SX98	NA	'35.1'	'not assigned.annotated'	'Lysine histidine transporter-like 8 OS=Arabidopsis thaliana (sp|q9sx98|lhtl8_arath : 171.0)'
Vitvi11g00126	1001.44	-1.16427	0.243468	-4.78203	1.7353e-06	0.00026215	1001.44	-2.89261	0.276304	-10.4689	1.20009e-25	6.93462e-23	1001.44	-1.50663	0.252156	-5.97498	2.30113e-09	5.72143e-08	1001.44	-2.34609	0.24437	-9.60054	7.95273e-22	1.74545e-19	VIT_11s0016g01640	AT3G53260.1	2.1e-160	564.3	1-to-1	NA	AT3G53260.1	phenylalanine ammonia-lyase 2	Encodes phenylalanine lyase. Arabidopsis has four PALs: AT2G37040 (PAL1)%2C AT3G53260 (PAL2)%2C AT5G04230 (PAL3) and AT3G10340 (PAL4).	"PAL2"	ATPAL2	phenylalanine ammonia-lyase 2	phenylalanine ammonia-lyase 2 (PAL2)%3B FUNCTIONS IN: phenylalanine ammonia-lyase activity%3B INVOLVED IN: response to oxidative stress%2C response to karrikin%2C phenylpropanoid biosynthetic process%2C response to wounding%2C defense response%3B LOCATED IN: cytoplasm%3B EXPRESSED IN: 22 plant structures%3B EXPRESSED DURING: 14 growth stages%3B CONTAINS InterPro DOMAIN/s: Phenylalanine/histidine …	****	PMID:7888622.PMID:15634198.gene:2101957.UniProt:P45724	"PAL2"	'9.2.1.1'	'Secondary metabolism.phenolics.p-coumaroyl-CoA synthesis.phenylalanine ammonia lyase (PAL)'	'Secondary metabolism.phenolics.p-coumaroyl-CoA synthesis.phenylalanine ammonia lyase (PAL) (original description: none)'
Vitvi08g01744	5665.6	-1.16808	0.291561	-4.00632	6.16728e-05	0.0035241	5665.6	-2.51902	0.326456	-7.71626	1.1979e-14	1.05023e-12	5665.6	-1.79631	0.291851	-6.15489	7.51316e-10	2.09604e-08	5665.6	-2.21169	0.291805	-7.57937	3.47247e-14	2.30887e-12	VIT_08s0007g06560	AT5G06740.1	1.1e-190	664.8	1-to-many	AT5G06740.2	AT5G06740.1	Concanavalin A-like lectin protein kinase family protein	NA	NA	LecRK-S.5.L-type lectin receptor kinase S.5	NA	Concanavalin A-like lectin protein kinase family protein%3B FUNCTIONS IN: in 6 functions%3B INVOLVED IN: protein amino acid phosphorylation%3B LOCATED IN: endomembrane system%3B EXPRESSED IN: root%3B CONTAINS InterPro DOMAIN/s: Legume lectin%2C beta chain (InterPro:IPR001220)%2C Protein kinase%2C ATP binding site (InterPro:IPR017441)%2C Serine/threonine-protein kinase-like domain (InterPro:IPR017…	***	gene:2170223.UniProt:Q9FG33	NA	'18.8.1.19'	'Protein modification.phosphorylation.TKL kinase superfamily.L-lectin kinase'	'Protein modification.phosphorylation.TKL kinase superfamily.L-lectin kinase (original description: none)'
Vitvi05g00551	900.636	-1.17964	0.26166	-4.5083	6.53486e-06	0.000721251	900.636	-1.92174	0.294155	-6.5331	6.44242e-11	2.87871e-09	900.636	-2.01779	0.262314	-7.69228	1.44533e-14	1.05493e-12	900.636	-1.57466	0.262806	-5.99172	2.07633e-09	5.39216e-08	VIT_05s0020g04000	AT3G13430.1	3.2e-10	64.7	1-to-many	AT3G13430.2.AT3G13430.3.AT3G13430.4	AT3G13430.1	RING/U-box superfamily protein	NA	NA	NA	NA	RING/U-box superfamily protein%3B FUNCTIONS IN: zinc ion binding%3B EXPRESSED IN: 24 plant structures%3B EXPRESSED DURING: 15 growth stages%3B CONTAINS InterPro DOMAIN/s: Zinc finger%2C RING-type (InterPro:IPR001841)%2C Zinc finger%2C C3HC4 RING-type (InterPro:IPR018957)%3B BEST Arabidopsis thaliana protein match is: RING/U-box superfamily protein (TAIR:AT1G55530.1)%3B Has 9891 Blast hits to 9858…	****	gene:2092894.UniProt:Q9LJE9	NA	'19.4.1.5.3.4'	'Protein degradation.peptide tagging.Ubiquitin (UBQ)-anchor addition (ubiquitylation).UBQ-ligase E3 activities.RING-domain E3 ligase activities.RING-H2-type E3 ligase'	'Protein degradation.peptide tagging.Ubiquitin (UBQ)-anchor addition (ubiquitylation).UBQ-ligase E3 activities.RING-domain E3 ligase activities.RING-H2-type E3 ligase (original description: none)'
Vitvi06g01946	7385.06	-1.18106	0.263404	-4.48384	7.33115e-06	0.000791077	7385.06	-1.97239	0.294525	-6.69686	2.12946e-11	1.05055e-09	7385.06	-1.17105	0.263362	-4.44653	8.72685e-06	8.92797e-05	7385.06	-2.02396	0.263391	-7.68423	1.53921e-14	1.08758e-12	VIT_06s0061g01300	AT2G27820.1	1.5e-174	610.9	1-to-1	NA	AT2G27820.1	prephenate dehydratase 1	Encodes a plastid-localized arogenate dehydratase involved in phenylalanine biosynthesis. Not less than six genes encoding ADT were identi%26	NA	NA	NA	NA	NA	NA	NA	'4.1.5.2.5'	'Amino acid metabolism.biosynthesis.shikimate family.phenylalanine and tyrosine.arogenate dehydratase (ADT)'	'Amino acid metabolism.biosynthesis.shikimate family.phenylalanine and tyrosine.arogenate dehydratase (ADT) (original description: none)'
Vitvi01g00568	17162.4	-1.18609	0.269965	-4.39351	1.11535e-05	0.00105723	17162.4	-2.43214	0.301952	-8.05475	7.96445e-16	8.85005e-14	17162.4	-3.84656	0.270126	-14.2399	5.18312e-46	4.50188e-42	17162.4	-2.81464	0.270097	-10.4208	1.99178e-25	6.95748e-23	VIT_01s0011g06600	AT5G17330.1	3.6e-105	380.9	1-to-1	NA	AT5G17330.1	glutamate decarboxylase	Encodes one of two isoforms of glutamate decarboxylase.	"GAD"	AtGAD1.GAD1.GLUTAMATE DECARBOXYLASE 1	glutamate decarboxylase	glutamate decarboxylase (GAD)%3B FUNCTIONS IN: calmodulin binding%2C glutamate decarboxylase activity%3B INVOLVED IN: response to cadmium ion%3B EXPRESSED IN: 13 plant structures%3B EXPRESSED DURING: 6 growth stages%3B CONTAINS InterPro DOMAIN/s: Pyridoxal phosphate-dependent transferase%2C major domain (InterPro:IPR015424)%2C Pyridoxal phosphate-dependent decarboxylase (InterPro:IPR002129)%2C Gl…	****	PMID:11782485.PMID:16502469.gene:2167239.UniProt:Q42521	NA	'35.1'	'not assigned.annotated'	'Glutamate decarboxylase OS=Petunia hybrida (sp|q07346|dce_pethy : 242.0)'
Vitvi08g01308	1882.27	-1.18665	0.268651	-4.41708	1.00043e-05	0.000975059	1882.27	-3.26629	0.302458	-10.7992	3.47315e-27	2.67591e-24	1882.27	-1.4904	0.268711	-5.54647	2.91491e-08	5.54407e-07	1882.27	-3.01572	0.26967	-11.183	4.93872e-29	3.14065e-26	VIT_08s0007g01650	AT2G37980.1	9.5e-95	347.1	1-to-1	NA	AT2G37980.1	O-fucosyltransferase family protein	NA	NA	NA	NA	O-fucosyltransferase family protein%3B FUNCTIONS IN: molecular_function unknown%3B INVOLVED IN: biological_process unknown%3B LOCATED IN: chloroplast%3B EXPRESSED IN: 13 plant structures%3B EXPRESSED DURING: L mature pollen stage%2C M germinated pollen stage%2C 4 anthesis%2C petal differentiation and expansion stage%3B CONTAINS InterPro DOMAIN/s: GDP-fucose protein O-fucosyltransferase (InterPro:…	*****	gene:2065562.UniProt:Q9SH89	NA	'35.1'	'not assigned.annotated'	'O-fucosyltransferase 19 OS=Arabidopsis thaliana (sp|q9sh89|oft19_arath : 300.0)'
Vitvi03g00862	1827.12	-1.18965	0.236043	-5.03997	4.65608e-07	9.53746e-05	1827.12	-1.94788	0.265168	-7.34584	2.04476e-13	1.44411e-11	1827.12	-1.64279	0.236392	-6.94945	3.66706e-12	1.63338e-10	1827.12	-2.11452	0.236742	-8.93174	4.19349e-19	6.50017e-17	VIT_03s0097g00710	AT1G58290.1	1.8e-156	552.4	1-to-1	NA	AT1G58290.1	Glutamyl-tRNA reductase family protein	Encodes a protein with glutamyl-tRNA reductase (GluTR) activity%2C catalyzing the NADPH-dependent reduction of Glu-tRNA(Glu) to glutamate 1-semialdehyde (GSA) with the release of free tRNA(Glu). It is involved in the early steps of chlorophyll biosynthesis.	"HEMA1"	NA	NA	HEMA1%3B FUNCTIONS IN: glutamyl-tRNA reductase activity%3B INVOLVED IN: chlorophyll biosynthetic process%2C heme biosynthetic process%2C response to light stimulus%2C porphyrin biosynthetic process%3B LOCATED IN: chloroplast%3B EXPRESSED IN: 23 plant structures%3B EXPRESSED DURING: 15 growth stages%3B CONTAINS InterPro DOMAIN/s: Quinate/shikimate 5-dehydrogenase/glutamyl-tRNA reductase (InterPro:…	****	PMID:7908550.PMID:15028209.gene:2016604.UniProt:P42804	NA	'7.12.1.2'	'Coenzyme metabolism.tetrapyrrol biosynthesis.5-aminolevulinic acid formation.glutamyl-tRNA reductase'	'Coenzyme metabolism.tetrapyrrol biosynthesis.5-aminolevulinic acid formation.glutamyl-tRNA reductase (original description: none)'
Vitvi14g00275	4447.76	-1.1942	0.243387	-4.9066	9.26687e-07	0.000161144	4447.76	-2.19193	0.271995	-8.05873	7.70941e-16	8.63488e-14	4447.76	-1.65098	0.24326	-6.78691	1.14564e-11	4.67166e-10	4447.76	-2.02355	0.243391	-8.31399	9.25365e-17	9.76595e-15	VIT_14s0128g00120	AT3G05200.1	2.1e-61	235	1-to-1	NA	AT3G05200.1	RING/U-box superfamily protein	Encodes a putative RING-H2 zinc finger protein ATL6 (ATL6).	"ATL6"	NA	Arabidopsis toxicos en levadura 6	ATL6%3B FUNCTIONS IN: zinc ion binding%3B INVOLVED IN: response to chitin%3B LOCATED IN: plasma membrane%3B EXPRESSED IN: 22 plant structures%3B EXPRESSED DURING: 12 growth stages%3B CONTAINS InterPro DOMAIN/s: Zinc finger%2C RING-type (InterPro:IPR001841)%2C Zinc finger%2C C3HC4 RING-type (InterPro:IPR018957)%3B BEST Arabidopsis thaliana protein match is: carbon/nitrogen insensitive 1 (TAIR:AT5G…	*****	PMID:14506206.PMID:17317660.PMID:17722694.gene:2096308.UniProt:Q8RXX9	NA	'19.4.1.5.3.4'	'Protein degradation.peptide tagging.Ubiquitin (UBQ)-anchor addition (ubiquitylation).UBQ-ligase E3 activities.RING-domain E3 ligase activities.RING-H2-type E3 ligase'	'Protein degradation.peptide tagging.Ubiquitin (UBQ)-anchor addition (ubiquitylation).UBQ-ligase E3 activities.RING-domain E3 ligase activities.RING-H2-type E3 ligase (original description: none)'
Vitvi05g01961	147.81	-1.19475	0.30392	-3.93115	8.45402e-05	0.00444222	147.81	-2.5763	0.41179	-6.25634	3.9411e-10	1.55836e-08	147.81	-1.1697	0.304442	-3.84211	0.000121981	0.000873739	147.81	-1.76176	0.326614	-5.39401	6.89005e-08	1.26578e-06	VIT_05s0049g01090	AT2G29490.1	7.8e-37	152.5	1-to-1	NA	AT2G29490.1	glutathione S-transferase TAU 1	Encodes glutathione transferase belonging to the tau class of GSTs. Naming convention according to Wagner et al. (2002).	"GSTU1"	ATGSTU1.glutathione S-transferase TAU 1.GST19.GLUTATHIONE S-TRANSFERASE 19	glutathione S-transferase TAU 1	glutathione S-transferase TAU 1 (GSTU1)%3B CONTAINS InterPro DOMAIN/s: Thioredoxin fold (InterPro:IPR012335)%2C Glutathione S-transferase%2C C-terminal (InterPro:IPR004046)%2C Glutathione S-transferase%2C C-terminal-like (InterPro:IPR010987)%2C Glutathione S-transferase/chloride channel%2C C-terminal (InterPro:IPR017933)%2C Glutathione S-transferase%2C N-terminal (InterPro:IPR004045)%2C Thioredox…	****	gene:2042986.UniProt:Q9ZW30	NA	'18.12.1.4'	'Protein modification.S-glutathionylation and deglutathionylation.glutathione S-transferase activities.class tau'	'Protein modification.S-glutathionylation and deglutathionylation.glutathione S-transferase activities.class tau (original description: none)'
Vitvi13g00161	1735.32	-1.19828	0.194923	-6.14745	7.87384e-10	6.56271e-07	1735.32	-1.70279	0.216567	-7.86262	3.76191e-15	3.52939e-13	1735.32	-1.79773	0.195338	-9.20316	3.47582e-20	9.33704e-18	1735.32	-1.1345	0.192149	-5.90426	3.54229e-09	8.71552e-08	VIT_13s0067g02710	AT3G56360.1	1.8e-38	157.9	1-to-1	NA	AT3G56360.1	hypothetical protein	NA	NA	NA	NA	unknown protein%3B FUNCTIONS IN: molecular_function unknown%3B INVOLVED IN: biological_process unknown%3B LOCATED IN: chloroplast%3B EXPRESSED IN: 24 plant structures%3B EXPRESSED DURING: 15 growth stages%3B BEST Arabidopsis thaliana protein match is: unknown protein (TAIR:AT5G05250.1)%3B Has 45 Blast hits to 45 proteins in 13 species: Archae - 0%3B Bacteria - 0%3B Metazoa - 0%3B Fungi - 0%3B Pla…	*****	gene:2102488.UniProt:Q9LY04	NA	'35.2'	'not assigned.not annotated'	' no hits & (original description: none)'
Vitvi08g00725	2023.61	-1.19975	0.247184	-4.85367	1.21195e-06	0.000196604	2023.61	-1.95295	0.276965	-7.05123	1.77339e-12	1.03652e-10	2023.61	-1.82117	0.247222	-7.36653	1.75126e-13	1.03241e-11	2023.61	-1.95537	0.24753	-7.89953	2.79949e-15	2.31434e-13	VIT_08s0058g00150	AT2G38290.1	1.5e-93	342.4	1-to-1	NA	AT2G38290.1	ammonium transporter 2	encodes a high-affinity ammonium transporter%2C which is expressed in shoot and root. Expression in root and shoot is under nitrogen and carbon dioxide regulation%2C respectively.	"AMT2"	ATAMT2.ammonium transporter 2	ammonium transporter 2	ammonium transporter 2 (AMT2)%3B FUNCTIONS IN: ammonium transmembrane transporter activity%2C high affinity secondary active ammonium transmembrane transporter activity%3B INVOLVED IN: ammonium transport%2C response to nematode%2C cellular response to nitrogen starvation%3B LOCATED IN: plasma membrane%3B EXPRESSED IN: 24 plant structures%3B EXPRESSED DURING: 13 growth stages%3B CONTAINS InterPro …	****	PMID:17317660.gene:2042916.UniProt:Q9M6N7	NA	'24.3.4.2'	'Solute transport.channels.AMT family.ammonium transporter (AMT2/3-type)'	'Solute transport.channels.AMT family.ammonium transporter (AMT2/3-type) (original description: none)'
Vitvi08g01084	1527.43	-1.201	0.310144	-3.87238	0.000107779	0.00532747	1527.43	-1.76924	0.346854	-5.10082	3.38192e-07	7.04797e-06	1527.43	-2.71609	0.31164	-8.71549	2.89516e-18	4.93066e-16	1527.43	-1.10691	0.309641	-3.57481	0.000350487	0.00236015	VIT_08s0040g02530	AT2G37440.1	6.1e-35	149.1	1-to-many	AT2G37440.3	AT2G37440.1	DNAse I-like superfamily protein	NA	NA	NA	NA	DNAse I-like superfamily protein%3B FUNCTIONS IN: hydrolase activity%2C inositol or phosphatidylinositol phosphatase activity%3B INVOLVED IN: biological_process unknown%3B EXPRESSED IN: sperm cell%2C root%3B CONTAINS InterPro DOMAIN/s: Inositol polyphosphate related phosphatase (InterPro:IPR000300)%2C Endonuclease/exonuclease/phosphatase (InterPro:IPR005135)%3B BEST Arabidopsis thaliana protein m…	*****	gene:2049825.UniProt:Q0WT19	NA	'50.3.1'	'Enzyme classification.EC_3 hydrolases.EC_3.1 hydrolase acting on ester bond'	'Type I inositol polyphosphate 5-phosphatase 8 OS=Arabidopsis thaliana (sp|q0wt19|ip5p8_arath : 127.0) & Enzyme classification.EC_3 hydrolases.EC_3.1 hydrolase acting on ester bond(50.3.1 : 22.4) (original description: none)'
Vitvi19g00070	1092.65	-1.20149	0.187286	-6.41526	1.40582e-10	1.78842e-07	1092.65	-2.03151	0.210357	-9.65744	4.57146e-22	1.33597e-19	1092.65	-1.68341	0.187192	-8.99298	2.40624e-19	5.45211e-17	1092.65	-1.65749	0.185783	-8.92167	4.59328e-19	7.03197e-17	VIT_19s0014g00960	AT5G54840.3	7.8e-25	114	1-to-1	NA	AT5G54840.3	Ras-related small GTP-binding family protein	NA	"SGP1"	NA	NA	NA	NA	NA	NA	'35.2'	'not assigned.not annotated'	' no hits & (original description: none)'
Vitvi11g00115	527.004	-1.20871	0.24934	-4.84764	1.24939e-06	0.000201327	527.004	-2.63889	0.281261	-9.38237	6.45075e-21	1.6401e-18	527.004	-1.59961	0.270769	-5.90765	3.47015e-09	8.25768e-08	527.004	-2.21489	0.247797	-8.93832	3.95123e-19	6.16317e-17	VIT_11s0016g01510	AT3G10340.1	1.7e-86	318.5	1-to-1	NA	AT3G10340.1	phenylalanine ammonia-lyase 4	Encodes PAL4%2C a putative a phenylalanine ammonia-lyase. Arabidopsis has four PALs: AT2G37040 (PAL1)%2C AT3G53260 (PAL2)%2C AT5G04230 (PAL3) and AT3G10340 (PAL4).	"PAL4"	NA	phenylalanine ammonia-lyase 4	phenylalanine ammonia-lyase 4 (PAL4)%3B FUNCTIONS IN: ammonia-lyase activity%2C catalytic activity%3B INVOLVED IN: L-phenylalanine catabolic process%2C biosynthetic process%3B LOCATED IN: cytoplasm%3B EXPRESSED IN: 15 plant structures%3B EXPRESSED DURING: 4 anthesis%2C C globular stage%2C petal differentiation and expansion stage%3B CONTAINS InterPro DOMAIN/s: Phenylalanine/histidine ammonia-lyas…	****	PMID:7925471.gene:2076243.UniProt:Q9SS45	PAL4	'50.4.3'	'Enzyme classification.EC_4 lyases.EC_4.3 carbon-nitrogen lyase'	'Enzyme classification.EC_4 lyases.EC_4.3 carbon-nitrogen lyase(50.4.3 : 316.4) & Phenylalanine ammonia-lyase OS=Pinus taeda (sp|p52777|paly_pinta : 294.0) (original description: none)'
Vitvi14g00183	17445.3	-1.20879	0.325204	-3.71703	0.000201579	0.00851813	17445.3	-2.55901	0.363735	-7.03536	1.98754e-12	1.1511e-10	17445.3	-2.84931	0.325169	-8.76256	1.90868e-18	3.45378e-16	17445.3	-2.48424	0.325286	-7.63707	2.2222e-14	1.5278e-12	VIT_14s0060g02320	AT1G09090.2	6.5e-128	457.6	1-to-1	NA	AT1G09090.2	respiratory burst oxidase-like protein	NADPH-oxidase AtrbohB plays a role in seed after-ripening. Major producer of superoxide in germinating seeds. AtrbohB pre-mRNA is alternatively spliced in seeds in a hormonally and developmentally regulated manner. ABA caused accumulation of AtrbohB-%C3%9F mRNA and prevented prevented AtrbohB-a mRNA expression in fresh seeds.	"RBOHB"	ATRBOHB-BETA.ATRBOHB.respiratory burst oxidase homolog B	respiratory burst oxidase homolog B	respiratory burst oxidase homolog B (RBOHB)%3B FUNCTIONS IN: NAD(P)H oxidase activity%3B INVOLVED IN: response to heat%2C seed germination%2C defense response%3B LOCATED IN: integral to membrane%2C membrane%3B EXPRESSED IN: embryo%2C root%3B EXPRESSED DURING: imbibition%3B CONTAINS InterPro DOMAIN/s: Ferredoxin reductase-type FAD-binding domain (InterPro:IPR017927)%2C Cytochrome b245%2C heavy cha…	****	gene:1006229838.UniProt:Q9SBI0	NA	'10.1.1'	'Redox homeostasis.reactive oxygen generation.Rboh NADPH-oxidase'	'Redox homeostasis.reactive oxygen generation.Rboh NADPH-oxidase (original description: none)'
Vitvi10g01798	452.031	-1.21001	0.320237	-3.77847	0.000157796	0.00708375	452.031	-2.05224	0.358149	-5.73011	1.00363e-08	2.94657e-07	452.031	-1.84085	0.320223	-5.74867	8.995e-09	1.93545e-07	452.031	-2.01209	0.321005	-6.26811	3.65461e-10	1.10804e-08	VIT_10s0003g01650	AT1G29290.1	4.5e-17	86.7	1-to-1	NA	AT1G29290.1	B-cell lymphoma 6 protein	NA	NA	NA	NA	unknown protein%3B FUNCTIONS IN: molecular_function unknown%3B INVOLVED IN: biological_process unknown%3B LOCATED IN: endomembrane system%3B Has 18 Blast hits to 18 proteins in 5 species: Archae - 0%3B Bacteria - 0%3B Metazoa - 0%3B Fungi - 0%3B Plants - 18%3B Viruses - 0%3B Other Eukaryotes - 0 (source: NCBI BLink).	*****	gene:2029908.UniProt:Q52K95	NA	'11.10.1.1.1'	'Phytohormones.signalling peptides.NCRP (non-cysteine-rich-peptide) category.PIP/PIPL family.PIP/PIPL precursor polypeptide'	'Phytohormones.signalling peptides.NCRP (non-cysteine-rich-peptide) category.PIP/PIPL family.PIP/PIPL precursor polypeptide (original description: none)'
Vitvi11g01475	3200.88	-1.21021	0.224929	-5.38041	7.43153e-08	2.27377e-05	3200.88	-2.07895	0.251321	-8.27207	1.31655e-16	1.69009e-14	3200.88	-1.95776	0.224745	-8.71103	3.01123e-18	5.02982e-16	3200.88	-1.52968	0.224371	-6.81763	9.25531e-12	3.84491e-10	GSVIVT00005633001	AT5G25240.1	9.7e-11	65.1	1-to-1	NA	AT5G25240.1	stress induced protein	NA	NA	NA	NA	unknown protein%3B FUNCTIONS IN: molecular_function unknown%3B INVOLVED IN: biological_process unknown%3B LOCATED IN: cellular_component unknown%3B EXPRESSED IN: 23 plant structures%3B EXPRESSED DURING: 13 growth stages%3B Has 1807 Blast hits to 1807 proteins in 277 species: Archae - 0%3B Bacteria - 0%3B Metazoa - 736%3B Fungi - 347%3B Plants - 385%3B Viruses - 0%3B Other Eukaryotes - 339 (source…	*****	gene:2146954.UniProt:Q8GYN8	NA	'35.2'	'not assigned.not annotated'	' no hits & (original description: none)'
Vitvi12g00274	1489.97	-1.21059	0.273898	-4.41984	9.87721e-06	0.000975059	1489.97	-2.22462	0.30719	-7.24184	4.4263e-13	2.91734e-11	1489.97	-1.2846	0.272969	-4.70602	2.52595e-06	2.99312e-05	1489.97	-1.78742	0.274396	-6.51402	7.31653e-11	2.52374e-09	VIT_12s0028g03270	AT3G15210.1	1.9e-34	144.1	1-to-1	NA	AT3G15210.1	ethylene responsive element binding factor 4	Encodes a member of the ERF (ethylene response factor) subfamily B-1 of ERF/AP2 transcription factor family (ATERF-4). The protein contains one AP2 domain. Acts as a negative regulator of JA-responsive defense gene expression and resistance to the necrotrophic fungal pathogen Fusarium oxysporum and antagonizes JA inhibition of root elongation.	"ERF4"	ATERF-4.ETHYLENE RESPONSIVE ELEMENT BINDING FACTOR 4.ATERF4.ETHYLENE RESPONSIVE ELEMENT BINDING FACTOR 4.RAP2.5.RELATED TO AP2 5	ethylene responsive element binding factor 4	ethylene responsive element binding factor 4 (ERF4)%3B CONTAINS InterPro DOMAIN/s: DNA-binding%2C integrase-type (InterPro:IPR016177)%2C Pathogenesis-related transcriptional factor/ERF%2C DNA-binding (InterPro:IPR001471)%3B BEST Arabidopsis thaliana protein match is: ethylene response factor 8 (TAIR:AT1G53170.1)%3B Has 6170 Blast hits to 5786 proteins in 253 species: Archae - 0%3B Bacteria - 0%3B…	*****	PMID:11118137.PMID:11487705.PMID:16021341.PMID:16183832.PMID:16280546.PMID:16442528.PMID:16429262.PMID:16407444.PMID:17189334.PMID:17722694.gene:2087064.UniProt:O80340	VviERF-4	'15.7.7.1'	'RNA biosynthesis.transcriptional activation.AP2/ERF superfamily.ERF-type transcription factor'	'RNA biosynthesis.transcriptional activation.AP2/ERF superfamily.ERF-type transcription factor (original description: none)'
Vitvi10g01406	1379.19	-1.22354	0.331522	-3.69066	0.000223672	0.00931138	1379.19	-3.39435	0.37055	-9.16032	5.17421e-20	1.18517e-17	1379.19	-1.96841	0.335165	-5.87295	4.28095e-09	9.95083e-08	1379.19	-2.90298	0.329738	-8.80391	1.32135e-18	1.7714e-16	VIT_10s0042g00700	AT4G08850.2	2.1e-65	250.4	1-to-1	NA	AT4G08850.2	Leucine-rich repeat receptor-like protein kinase family protein	NA	NA	NA	NA	Leucine-rich repeat receptor-like protein kinase family protein%3B FUNCTIONS IN: kinase activity%3B INVOLVED IN: protein amino acid phosphorylation%3B LOCATED IN: plasma membrane%2C membrane%3B EXPRESSED IN: 23 plant structures%3B EXPRESSED DURING: 13 growth stages%3B CONTAINS InterPro DOMAIN/s: Protein kinase%2C ATP binding site (InterPro:IPR017441)%2C Protein kinase%2C catalytic domain (InterPr…	*****	PMID:14506206.PMID:16280546.PMID:17317660.PMID:17432890.PMID:17644812.gene:1005713859.UniProt:Q8VZG8-2	NA	'50.2.7'	'Enzyme classification.EC_2 transferases.EC_2.7 transferase transferring phosphorus-containing group'	'MDIS1-interacting receptor like kinase 2 OS=Arabidopsis thaliana (sp|q8vzg8|mik2_arath : 424.0) & Enzyme classification.EC_2 transferases.EC_2.7 transferase transferring phosphorus-containing group(50.2.7 : 82.1) (original description: none)'
Vitvi01g01954	273.954	-1.23165	0.317062	-3.88458	0.000102509	0.00515124	273.954	-1.89224	0.3436	-5.5071	3.648e-08	9.44506e-07	273.954	-1.91852	0.317216	-6.04802	1.46641e-09	3.80959e-08	273.954	-1.75867	0.299585	-5.87035	4.34873e-09	1.04868e-07	VIT_01s0011g04040	NA	NA	NA	NA	NA	NA	NA	NA	NA	NA	NA	NA	NA	NA	NA	'35.2'	'not assigned.not annotated'	' no hits & (original description: none)'
Vitvi18g00489	1149.12	-1.23666	0.2437	-5.07452	3.88476e-07	8.38379e-05	1149.12	-2.02352	0.275227	-7.35219	1.94991e-13	1.3926e-11	1149.12	-1.62959	0.243901	-6.68134	2.36761e-11	8.9597e-10	1149.12	-1.87668	0.243569	-7.70491	1.3094e-14	9.35861e-13	VIT_18s0001g07090	AT4G24380.1	2.4e-29	129.4	1-to-many	AT4G24380.2.AT4G24380.3.AT4G24380.4.AT4G24380.5	AT4G24380.1	dihydrofolate reductase	NA	NA	NA	NA	INVOLVED IN: 10-formyltetrahydrofolate biosynthetic process%2C folic acid and derivative biosynthetic process%3B EXPRESSED IN: 24 plant structures%3B EXPRESSED DURING: 15 growth stages%3B CONTAINS InterPro DOMAIN/s: Serine hydrolase (InterPro:IPR005645)%3B BEST Arabidopsis thaliana protein match is: alpha/beta-Hydrolases superfamily protein (TAIR:AT5G65400.1)%3B Has 30201 Blast hits to 17322 prot…	****	gene:2135921.UniProt:Q8GX45	NA	'35.2'	'not assigned.not annotated'	' no hits & (original description: none)'
Vitvi10g01743	1431.16	-1.23715	0.31501	-3.92734	8.58907e-05	0.0044895	1431.16	-3.52314	0.349876	-10.0697	7.52258e-24	3.18769e-21	1431.16	-2.04294	0.314056	-6.50502	7.76853e-11	2.66699e-09	1431.16	-2.74188	0.310455	-8.83181	1.02995e-18	1.42703e-16	VIT_00s0181g00080	AT4G21510.1	2.8e-06	51.6	1-to-1	NA	AT4G21510.1	F-box family protein	NA	"FBS2"	AtFBS2	F-box stress induced 2	F-box family protein%3B CONTAINS InterPro DOMAIN/s: F-box domain%2C cyclin-like (InterPro:IPR001810)%3B BEST Arabidopsis thaliana protein match is: F-box family protein (TAIR:AT4G05010.1)%3B Has 30201 Blast hits to 17322 proteins in 780 species: Archae - 12%3B Bacteria - 1396%3B Metazoa - 17338%3B Fungi - 3422%3B Plants - 5037%3B Viruses - 0%3B Other Eukaryotes - 2996 (source: NCBI BLink).	****	gene:2119606.UniProt:O65416	NA	'35.2'	'not assigned.not annotated'	' no hits & (original description: none)'
Vitvi10g02135	3578.63	-1.23769	0.252057	-4.91036	9.0909e-07	0.000159707	3578.63	-2.83447	0.282757	-10.0244	1.19076e-23	4.73047e-21	3578.63	-2.26013	0.252224	-8.96078	3.22383e-19	7.05911e-17	3578.63	-2.74963	0.252586	-10.8859	1.3455e-27	6.95204e-25	VIT_00s0353g00050	AT1G61610.1	1.4e-123	443.4	1-to-many	AT1G61610.2	AT1G61610.1	S-locus lectin protein kinase family protein	NA	NA	NA	NA	S-locus lectin protein kinase family protein%3B FUNCTIONS IN: in 6 functions%3B INVOLVED IN: protein amino acid phosphorylation%2C recognition of pollen%3B LOCATED IN: endomembrane system%3B EXPRESSED IN: 7 plant structures%3B EXPRESSED DURING: 6 growth stages%3B CONTAINS InterPro DOMAIN/s: Curculin-like (mannose-binding) lectin (InterPro:IPR001480)%2C Protein kinase%2C ATP binding site (InterPro…	***	gene:2200907.UniProt:Q9SY89	NA	'50.2.7'	'Enzyme classification.EC_2 transferases.EC_2.7 transferase transferring phosphorus-containing group'	'Putative G-type lectin S-receptor-like serine/threonine-protein kinase At1g61610 OS=Arabidopsis thaliana (sp|q9sy89|y1661_arath : 425.0) & Enzyme classification.EC_2 transferases.EC_2.7 transferase transferring phosphorus-containing group(50.2.7 : 48.1) (original description: none)'
Vitvi12g00649	6418.77	-1.23931	0.319255	-3.8819	0.000103645	0.00519753	6418.77	-1.5956	0.357131	-4.46782	7.90198e-06	0.000110389	6418.77	-1.00277	0.319166	-3.14184	0.00167892	0.00798314	6418.77	-1.72061	0.319395	-5.3871	7.16034e-08	1.31155e-06	VIT_12s0057g00420	AT5G35735.1	4.7e-108	390.2	1-to-1	NA	AT5G35735.1	Auxin-responsive family protein	NA	NA	NA	NA	Auxin-responsive family protein%3B LOCATED IN: plasma membrane%2C membrane%3B EXPRESSED IN: 21 plant structures%3B EXPRESSED DURING: 12 growth stages%3B CONTAINS InterPro DOMAIN/s: Cytochrome b561%2C eukaryote (InterPro:IPR004877)%2C Uncharacterised conserved protein UCP037471 (InterPro:IPR017214)%2C Protein of unknown function DUF568%2C DOMON-like (InterPro:IPR007613)%2C DOMON related (InterPro:…	****	PMID:10080694.PMID:17317660.PMID:17722694.gene:3710951.UniProt:Q9FKH6	NA	'35.1'	'not assigned.annotated'	'Cytochrome b561 and DOMON domain-containing protein At5g47530 OS=Arabidopsis thaliana (sp|q9fgk4|b561j_arath : 225.0)'
Vitvi03g00268	2626.27	-1.24337	0.237997	-5.22433	1.74789e-07	4.44718e-05	2626.27	-1.6032	0.26608	-6.02527	1.68828e-09	5.76941e-08	2626.27	-1.41318	0.238026	-5.93709	2.90128e-09	7.01285e-08	2626.27	-1.30872	0.237728	-5.50513	3.68896e-08	7.19826e-07	VIT_03s0038g04170	AT5G06740.1	4.4e-112	404.1	1-to-many	AT5G06740.2	AT5G06740.1	Concanavalin A-like lectin protein kinase family protein	NA	NA	LecRK-S.5.L-type lectin receptor kinase S.5	NA	Concanavalin A-like lectin protein kinase family protein%3B FUNCTIONS IN: in 6 functions%3B INVOLVED IN: protein amino acid phosphorylation%3B LOCATED IN: endomembrane system%3B EXPRESSED IN: root%3B CONTAINS InterPro DOMAIN/s: Legume lectin%2C beta chain (InterPro:IPR001220)%2C Protein kinase%2C ATP binding site (InterPro:IPR017441)%2C Serine/threonine-protein kinase-like domain (InterPro:IPR017…	***	gene:2170223.UniProt:Q9FG33	NA	'18.8.1.19'	'Protein modification.phosphorylation.TKL kinase superfamily.L-lectin kinase'	'Protein modification.phosphorylation.TKL kinase superfamily.L-lectin kinase (original description: none)'
Vitvi09g00985	8682.44	-1.24498	0.271963	-4.57777	4.69958e-06	0.000553449	8682.44	-2.45994	0.304167	-8.08745	6.0927e-16	7.07337e-14	8682.44	-1.46655	0.271861	-5.39451	6.87117e-08	1.19123e-06	8682.44	-1.86879	0.271807	-6.87543	6.18016e-12	2.68902e-10	VIT_09s0070g00160	AT4G30960.1	3.8e-145	513.1	1-to-1	NA	AT4G30960.1	SOS3-interacting protein 3	Encodes CBL-interacting protein kinase 6 (CIPK6). Required for development and salt tolerance.	"SIP3"	ATCIPK6.CBL-INTERACTING PROTEIN KINASE 6.CIPK6.CBL-INTERACTING PROTEIN KINASE 6.SNRK3.14.SNF1-RELATED PROTEIN KINASE 3.14	SOS3-interacting protein 3	SOS3-interacting protein 3 (SIP3)%3B FUNCTIONS IN: protein serine/threonine kinase activity%2C protein kinase activity%2C kinase activity%2C ATP binding%3B INVOLVED IN: in 6 processes%3B LOCATED IN: cellular_component unknown%3B EXPRESSED IN: 22 plant structures%3B EXPRESSED DURING: 13 growth stages%3B CONTAINS InterPro DOMAIN/s: Protein kinase%2C ATP binding site (InterPro:IPR017441)%2C Serine/t…	*****	gene:2126748.UniProt:O65554	NA	'18.8.5.3'	'Protein modification.phosphorylation.CAMK kinase superfamily.SNF1-related SnRK3 kinase'	'Protein modification.phosphorylation.CAMK kinase superfamily.SNF1-related SnRK3 kinase (original description: none)'
Vitvi08g01794	188.527	-1.24686	0.292966	-4.256	2.08116e-05	0.00158188	188.527	-1.7206	0.350996	-4.90207	9.48327e-07	1.7284e-05	188.527	-2.3316	0.30255	-7.70651	1.2931e-14	9.54514e-13	188.527	-1.21926	0.31373	-3.88634	0.000101769	0.000810524	VIT_08s0007g07190	AT3G13600.1	1.1e-59	230.3	1-to-many	AT3G13600.2	AT3G13600.1	calmodulin-binding family protein	NA	NA	NA	NA	calmodulin-binding family protein%3B CONTAINS InterPro DOMAIN/s: IQ calmodulin-binding region (InterPro:IPR000048)%3B BEST Arabidopsis thaliana protein match is: calmodulin-binding family protein (TAIR:AT3G58480.1)%3B Has 2440 Blast hits to 1727 proteins in 273 species: Archae - 4%3B Bacteria - 163%3B Metazoa - 734%3B Fungi - 252%3B Plants - 308%3B Viruses - 55%3B Other Eukaryotes - 924 (source: …	****	gene:2086818.UniProt:Q9LHN9	NA	'35.1'	'not assigned.annotated'	'IQ domain-containing protein IQM6 OS=Arabidopsis thaliana (sp|q9m2g8|iqm6_arath : 206.0)'
Vitvi03g01092	18225.3	-1.24973	0.239739	-5.2129	1.85911e-07	4.63264e-05	18225.3	-3.38981	0.26814	-12.642	1.23909e-36	5.25062e-33	18225.3	-1.56815	0.239858	-6.53783	6.24163e-11	2.18013e-09	18225.3	-3.12554	0.239707	-13.039	7.34193e-39	2.60125e-35	VIT_03s0017g00650	AT5G64300.1	1.2e-51	204.5	1-to-1	NA	AT5G64300.1	GTP cyclohydrolase II	encodes GTP cyclohydrolase II that can functionally complement E. coli mutant deficient in this gene. It also has 3%2C4-dihydroxy-2-butanone-4-phosphate synthase activity which makes it a bifunctional enzyme involved in the formation of the pyrimidine and of the carbohydrate from GTP and ribulose-5-phosphate%2C respectively	"GCH"	ATGCH.ARABIDOPSIS THALIANA GTP CYCLOHYDROLASE II.ATRIBA1.Arabidopsis thaliana riboflavin A1.RFD1.RED FLUORESCENT IN DARKNESS 1.RIBA1.riboflavin A1	GTP cyclohydrolase II	GTP cyclohydrolase II (GCH)%3B FUNCTIONS IN: 3%2C4-dihydroxy-2-butanone-4-phosphate synthase activity%2C GTP cyclohydrolase II activity%3B INVOLVED IN: riboflavin biosynthetic process%3B LOCATED IN: chloroplast%2C membrane%3B EXPRESSED IN: 22 plant structures%3B EXPRESSED DURING: 13 growth stages%3B CONTAINS InterPro DOMAIN/s: GTP cyclohydrolase II (InterPro:IPR000926)%2C DHBP synthase RibB (Inte…	****	PMID:10783978.PMID:7642114.PMID:17432890.PMID:18431481.gene:2173372.UniProt:P47924	NA	'50.3.5'	'Enzyme classification.EC_3 hydrolases.EC_3.5 hydrolase acting on carbon-nitrogen bond. other than peptide bond'	'Bifunctional riboflavin biosynthesis protein RIBA 1. chloroplastic OS=Arabidopsis thaliana (sp|p47924|riba1_arath : 200.0) & Enzyme classification.EC_3 hydrolases.EC_3.5 hydrolase acting on carbon-nitrogen bond. other than peptide bond(50.3.5 : 156.5) (original description: none)'
Vitvi16g01923	6885.91	-1.25684	0.265669	-4.73083	2.23605e-06	0.000312414	6885.91	-3.305	0.298125	-11.086	1.46759e-28	1.62233e-25	6885.91	-1.98413	0.266076	-7.45702	8.8499e-14	5.45733e-12	6885.91	-3.104	0.266069	-11.6661	1.89869e-31	1.81113e-28	VIT_16s0050g01190	AT1G01490.1	9.2e-13	73.2	1-to-many	AT1G01490.2.AT1G01490.4	AT1G01490.1	Heavy metal transport/detoxification superfamily protein	NA	NA	NA	NA	Heavy metal transport/detoxification superfamily protein %3B FUNCTIONS IN: metal ion binding%3B INVOLVED IN: metal ion transport%3B LOCATED IN: cellular_component unknown%3B EXPRESSED IN: 22 plant structures%3B EXPRESSED DURING: 14 growth stages%3B CONTAINS InterPro DOMAIN/s: Heavy metal transport/detoxification protein (InterPro:IPR006121)%3B BEST Arabidopsis thaliana protein match is: Heavy met…	****	gene:2025420.UniProt:O03982	NA	'35.2'	'not assigned.not annotated'	' no hits & (original description: none)'
Vitvi16g01788	313.799	-1.26971	0.297185	-4.27247	1.93322e-05	0.00151223	313.799	-1.76046	0.335582	-5.246	1.5544e-07	3.46369e-06	313.799	-1.11096	0.303382	-3.66192	0.000250335	0.00159642	313.799	-1.49121	0.29656	-5.02835	4.94719e-07	7.38683e-06	VIT_16s0022g00650	NA	NA	NA	NA	NA	NA	NA	NA	NA	NA	NA	NA	NA	NA	NA	'35.2'	'not assigned.not annotated'	' no hits & (original description: none)'
Vitvi18g00386	1556.49	-1.27073	0.29897	-4.25035	2.13433e-05	0.00160238	1556.49	-2.26847	0.333549	-6.80101	1.03888e-11	5.37952e-10	1556.49	-1.73822	0.298654	-5.82018	5.8783e-09	1.31252e-07	1556.49	-2.25738	0.297499	-7.58786	3.2522e-14	2.17407e-12	VIT_18s0001g05310	AT1G78100.1	4.8e-75	280.8	1-to-1	NA	AT1G78100.1	F-box family protein	NA	"AUF1"	NA	auxin up-regulated f-box protein 1	F-box family protein%3B CONTAINS InterPro DOMAIN/s: F-box domain%2C cyclin-like (InterPro:IPR001810)%2C F-box domain%2C Skp2-like (InterPro:IPR022364)%3B BEST Arabidopsis thaliana protein match is: F-box family protein (TAIR:AT1G22220.1)%3B Has 149 Blast hits to 148 proteins in 12 species: Archae - 0%3B Bacteria - 0%3B Metazoa - 0%3B Fungi - 0%3B Plants - 149%3B Viruses - 0%3B Other Eukaryotes - …	*****	gene:2194718.UniProt:Q9C9S2	NA	'19.4.1.5.4.1.4.6'	'Protein degradation.peptide tagging.Ubiquitin (UBQ)-anchor addition (ubiquitylation).UBQ-ligase E3 activities.Cullin-based ubiquitylation complexes.SKP1-CUL1-FBX (SCF) E3 ligase complexes.F-BOX substrate adaptor components.FBX component'	'Protein degradation.peptide tagging.Ubiquitin (UBQ)-anchor addition (ubiquitylation).UBQ-ligase E3 activities.Cullin-based ubiquitylation complexes.SKP1-CUL1-FBX (SCF) E3 ligase complexes.F-BOX substrate adaptor components.FBX component (original description: none)'
Vitvi04g00262	1451.72	-1.27989	0.301225	-4.24893	2.1479e-05	0.00160238	1451.72	-1.27414	0.338309	-3.76621	0.000165747	0.00155216	1451.72	-2.8189	0.30186	-9.33843	9.77776e-21	3.06963e-18	1451.72	-1.70859	0.303789	-5.62427	1.86298e-08	3.87941e-07	VIT_04s0008g02960	AT5G36110.1	1.3e-100	365.5	1-to-many	AT5G36110.2	AT5G36110.1	cytochrome P450%2C family 716%2C subfamily A%2C polypeptide 1	member of CYP716A	"CYP716A1"	NA	cytochrome P450%2C family 716%2C subfamily A%2C polypeptide 1	cytochrome P450%2C family 716%2C subfamily A%2C polypeptide 1 (CYP716A1)%3B FUNCTIONS IN: electron carrier activity%2C monooxygenase activity%2C iron ion binding%2C oxygen binding%2C heme binding%3B INVOLVED IN: oxidation reduction%3B LOCATED IN: endomembrane system%3B CONTAINS InterPro DOMAIN/s: Cytochrome P450 (InterPro:IPR001128)%2C Cytochrome P450%2C conserved site (InterPro:IPR017972)%2C Cyt…	****	gene:2158960.UniProt:Q9LVY7	NA	'50.1.13'	'Enzyme classification.EC_1 oxidoreductases.EC_1.14 oxidoreductase acting on paired donor with incorporation or reduction of molecular oxygen'	'Beta-amyrin 28-oxidase OS=Panax ginseng (sp|i7c6e8|c7a52_pangi : 406.0) & Enzyme classification.EC_1 oxidoreductases.EC_1.14 oxidoreductase acting on paired donor with incorporation or reduction of molecular oxygen(50.1.13 : 56.8) (original description: none)'
Vitvi10g00063	7041.9	-1.28603	0.213367	-6.02733	1.66688e-09	1.185e-06	7041.9	-2.55333	0.238495	-10.706	9.53725e-27	6.38117e-24	7041.9	-2.192	0.213052	-10.2886	7.93603e-25	5.44182e-22	7041.9	-1.65821	0.213188	-7.77814	7.36001e-15	5.49806e-13	VIT_10s0116g01200	AT1G62300.1	4.9e-54	211.1	1-to-1	NA	AT1G62300.1	WRKY family transcription factor	Encodes a transcription factor WRKY6. Regulates Phosphate1 (Pho1) expression in response to low phosphate (Pi) stress.	"WRKY6"	NA	NA	WRKY6%3B CONTAINS InterPro DOMAIN/s: DNA-binding WRKY (InterPro:IPR003657)%3B BEST Arabidopsis thaliana protein match is: WRKY family transcription factor (TAIR:AT4G04450.1)%3B Has 3824 Blast hits to 3363 proteins in 295 species: Archae - 0%3B Bacteria - 33%3B Metazoa - 119%3B Fungi - 43%3B Plants - 3509%3B Viruses - 0%3B Other Eukaryotes - 120 (source: NCBI BLink).	*****	PMID:10785665.PMID:11118137.PMID:12000796.PMID:11722756.PMID:15341634.PMID:17722694.gene:2018051.UniProt:Q9C519	"WRKY6"	'15.7.22'	'RNA biosynthesis.transcriptional activation.WRKY transcription factor'	'RNA biosynthesis.transcriptional activation.WRKY transcription factor (original description: none)'
Vitvi17g00906	1061	-1.28619	0.345091	-3.7271	0.000193693	0.00831572	1061	-2.89596	0.387933	-7.46508	8.32459e-14	6.31799e-12	1061	-2.45227	0.342387	-7.16228	7.93439e-13	3.99896e-11	1061	-2.36512	0.344821	-6.85898	6.9355e-12	2.99664e-10	VIT_17s0000g09190	AT5G63130.1	2.3e-13	74.7	1-to-many	AT5G63130.2	AT5G63130.1	Octicosapeptide/Phox/Bem1p family protein	NA	NA	NA	NA	Octicosapeptide/Phox/Bem1p family protein%3B CONTAINS InterPro DOMAIN/s: Octicosapeptide/Phox/Bem1p (InterPro:IPR000270)%3B BEST Arabidopsis thaliana protein match is: Octicosapeptide/Phox/Bem1p family protein (TAIR:AT3G48240.1)%3B Has 353 Blast hits to 353 proteins in 15 species: Archae - 0%3B Bacteria - 0%3B Metazoa - 0%3B Fungi - 0%3B Plants - 353%3B Viruses - 0%3B Other Eukaryotes - 0 (source…	****	gene:2161906.UniProt:Q9FML0	NA	'35.2'	'not assigned.not annotated'	' no hits & (original description: none)'
Vitvi07g01929	10984.8	-1.28911	0.276784	-4.65745	3.20151e-06	0.000403039	10984.8	-3.13956	0.309649	-10.1391	3.70487e-24	1.68208e-21	10984.8	-2.6855	0.276713	-9.705	2.87066e-22	1.18731e-19	10984.8	-2.08501	0.276677	-7.53591	4.84949e-14	3.12395e-12	VIT_07s0031g02610	AT5G08790.1	2.4e-46	185.3	1-to-1	NA	AT5G08790.1	NAC (No Apical Meristem) domain transcriptional regulator superfamily protein	induced by wounding%2C belongs to a large family of putative transcriptional activators with NAC domain.	"ATAF2"	NA	NA	ATAF2%3B CONTAINS InterPro DOMAIN/s: No apical meristem (NAM) protein (InterPro:IPR003441)%3B BEST Arabidopsis thaliana protein match is: NAC domain containing protein 102 (TAIR:AT5G63790.1)%3B Has 30201 Blast hits to 17322 proteins in 780 species: Archae - 12%3B Bacteria - 1396%3B Metazoa - 17338%3B Fungi - 3422%3B Plants - 5037%3B Viruses - 0%3B Other Eukaryotes - 2996 (source: NCBI BLink).	****	PMID:17722694.gene:504954183.UniProt:Q9C598	NA	'15.7.17'	'RNA biosynthesis.transcriptional activation.NAC transcription factor'	'RNA biosynthesis.transcriptional activation.NAC transcription factor (original description: none)'
Vitvi13g00766	688.865	-1.29813	0.334848	-3.87677	0.000105851	0.00528619	688.865	-1.51031	0.372539	-4.05409	5.03301e-05	0.000551332	688.865	-1.66657	0.334336	-4.98472	6.2051e-07	8.59577e-06	688.865	-1.46764	0.332862	-4.40915	1.03775e-05	0.000112194	VIT_13s0074g00570	AT1G08230.2	4.5e-38	158.3	1-to-many	AT1G08230.3.AT1G08230.4.AT1G08230.5.AT1G08230.6	AT1G08230.2	Transmembrane amino acid transporter family protein	Codes for a H+-driven%2C high affinity gamma-aminobutyric acid (GABA) transporter. Localized at the plasma membrane. In planta%2C AtGAT1 expression was highest in flowers and under conditions of elevated GABA concentrations such as wounding or senescence.	NA	NA	NA	Transmembrane amino acid transporter family protein%3B EXPRESSED IN: 22 plant structures%3B EXPRESSED DURING: 10 growth stages%3B CONTAINS InterPro DOMAIN/s: Amino acid transporter%2C transmembrane (InterPro:IPR013057)%3B BEST Arabidopsis thaliana protein match is: Transmembrane amino acid transporter family protein (TAIR:AT5G41800.1)%3B Has 2686 Blast hits to 2681 proteins in 218 species: Archae…	*****	gene:4010711697.UniProt:F4HW02	NA	'35.1'	'not assigned.annotated'	'GABA transporter 1 OS=Arabidopsis thaliana (sp|f4hw02|gat1_arath : 144.0)'
Vitvi03g01276	452.248	-1.30644	0.350094	-3.73168	0.00019021	0.00819532	452.248	-2.75968	0.38737	-7.12415	1.04728e-12	6.40075e-11	452.248	-2.61856	0.347708	-7.5309	5.03914e-14	3.25819e-12	452.248	-1.06778	0.34298	-3.11323	0.00185049	0.00970686	VIT_03s0017g02120	AT3G21790.1	4.4e-118	423.3	1-to-1	NA	AT3G21790.1	UDP-Glycosyltransferase superfamily protein	NA	NA	NA	NA	UDP-Glycosyltransferase superfamily protein%3B FUNCTIONS IN: transferase activity%2C transferring hexosyl groups%2C UDP-glycosyltransferase activity%3B INVOLVED IN: metabolic process%3B LOCATED IN: cellular_component unknown%3B EXPRESSED IN: 20 plant structures%3B EXPRESSED DURING: 13 growth stages%3B CONTAINS InterPro DOMAIN/s: UDP-glucuronosyl/UDP-glucosyltransferase (InterPro:IPR002213)%3B BES…	*****	gene:2093023.UniProt:Q9LSY5	NA	'50.2.4'	'Enzyme classification.EC_2 transferases.EC_2.4 glycosyltransferase'	'Putative UDP-glucose flavonoid 3-O-glucosyltransferase 3 OS=Fragaria ananassa (sp|q66pf3|ufog3_fraan : 471.0) & Enzyme classification.EC_2 transferases.EC_2.4 glycosyltransferase(50.2.4 : 272.2) (original description: none)'
Vitvi10g01748	1325.59	-1.30723	0.291006	-4.49209	7.05292e-06	0.000771385	1325.59	-3.41262	0.329996	-10.3414	4.57857e-25	2.28255e-22	1325.59	-2.36987	0.290304	-8.16342	3.25666e-16	3.39008e-14	1325.59	-2.87894	0.291782	-9.86673	5.80237e-23	1.46841e-20		AT4G21510.1	9.9e-07	53.1	1-to-1	NA	AT4G21510.1	F-box family protein	NA	"FBS2"	AtFBS2	F-box stress induced 2	F-box family protein%3B CONTAINS InterPro DOMAIN/s: F-box domain%2C cyclin-like (InterPro:IPR001810)%3B BEST Arabidopsis thaliana protein match is: F-box family protein (TAIR:AT4G05010.1)%3B Has 30201 Blast hits to 17322 proteins in 780 species: Archae - 12%3B Bacteria - 1396%3B Metazoa - 17338%3B Fungi - 3422%3B Plants - 5037%3B Viruses - 0%3B Other Eukaryotes - 2996 (source: NCBI BLink).	****	gene:2119606.UniProt:O65416	NA	'35.2'	'not assigned.not annotated'	' no hits & (original description: none)'
Vitvi07g00350	5897.47	-1.30965	0.313065	-4.18331	2.87296e-05	0.00200122	5897.47	-2.53747	0.349916	-7.25164	4.11767e-13	2.73347e-11	5897.47	-2.17047	0.313352	-6.9266	4.31064e-12	1.89415e-10	5897.47	-2.45154	0.312865	-7.83578	4.65929e-15	3.75178e-13	VIT_07s0005g00720	AT1G02810.1	7.8e-106	382.9	1-to-1	NA	AT1G02810.1	Plant invertase/pectin methylesterase inhibitor superfamily	NA	NA	NA	NA	Plant invertase/pectin methylesterase inhibitor superfamily%3B FUNCTIONS IN: enzyme inhibitor activity%2C pectinesterase activity%3B INVOLVED IN: cell wall modification%3B LOCATED IN: endomembrane system%2C cell wall%2C plant-type cell wall%3B EXPRESSED IN: 14 plant structures%3B EXPRESSED DURING: 6 growth stages%3B CONTAINS InterPro DOMAIN/s: Pectinesterase%2C active site (InterPro:IPR018040)%2C…	*****	PMID:16622707.gene:2024749.UniProt:Q9SRX4	NA	'21.3.1.2.1'	'Cell wall.pectin.homogalacturonan.modification and degradation.pectin methylesterase'	'Cell wall.pectin.homogalacturonan.modification and degradation.pectin methylesterase (original description: none)'
Vitvi10g00938	164.989	-1.31262	0.333255	-3.93878	8.18965e-05	0.00434105	164.989	-2.06673	0.379209	-5.45012	5.03362e-08	1.25964e-06	164.989	-1.09227	0.32956	-3.31434	0.000918601	0.00481657	164.989	-1.76308	0.323615	-5.44808	5.09153e-08	9.65406e-07	VIT_10s0003g04910	AT4G39330.1	2.3e-58	224.9	1-to-many	AT4G39330.2	AT4G39330.1	cinnamyl alcohol dehydrogenase 9	NA	"CAD9"	ATCAD9	cinnamyl alcohol dehydrogenase 9	cinnamyl alcohol dehydrogenase 9 (CAD9)%3B FUNCTIONS IN: oxidoreductase activity%2C zinc ion binding%3B INVOLVED IN: oxidation reduction%3B LOCATED IN: apoplast%3B EXPRESSED IN: 25 plant structures%3B EXPRESSED DURING: 15 growth stages%3B CONTAINS InterPro DOMAIN/s: GroES-like (InterPro:IPR011032)%2C Polyketide synthase%2C enoylreductase (InterPro:IPR020843)%2C Alcohol dehydrogenase%2C zinc-conta…	****	PMID:7630954.PMID:17467016.PMID:18538804.gene:2136277.UniProt:P42734	NA	'50.1.1'	'Enzyme classification.EC_1 oxidoreductases.EC_1.1 oxidoreductase acting on CH-OH group of donor'	'Enzyme classification.EC_1 oxidoreductases.EC_1.1 oxidoreductase acting on CH-OH group of donor(50.1.1 : 280.4) & Probable mannitol dehydrogenase OS=Fragaria ananassa (sp|q9zrf1|mtdh_fraan : 213.0) (original description: none)'
Vitvi07g00405	1014.94	-1.32524	0.342148	-3.87329	0.000107375	0.00531834	1014.94	-2.85072	0.384769	-7.40893	1.27322e-13	9.32898e-12	1014.94	-1.0691	0.342869	-3.11809	0.00182026	0.00854297	1014.94	-2.04456	0.341616	-5.98496	2.1644e-09	5.58578e-08	VIT_07s0005g01360	AT4G02075.1	4.1e-21	101.7	1-to-many	AT4G02075.2.AT4G02075.3	AT4G02075.1	RING/FYVE/PHD zinc finger superfamily protein	NA	"PIT1"	NA	pitchoun 1	pitchoun 1 (PIT1)%3B FUNCTIONS IN: zinc ion binding%3B LOCATED IN: plasma membrane%3B EXPRESSED IN: 18 plant structures%3B EXPRESSED DURING: 10 growth stages%3B CONTAINS InterPro DOMAIN/s: Protein of unknown function DUF3675 (InterPro:IPR022143)%2C Zinc finger%2C C3HC4 RING-type (InterPro:IPR018957)%2C Zinc finger%2C RING-CH-type (InterPro:IPR011016)%3B BEST Arabidopsis thaliana protein match is:…	*****	PMID:17644812.gene:3705781.UniProt:Q9XF50	NA	'35.2'	'not assigned.not annotated'	' no hits & (original description: none)'
Vitvi17g00438	5407.87	-1.32736	0.265326	-5.00276	5.65151e-07	0.000111969	5407.87	-2.64172	0.297306	-8.88551	6.36254e-19	1.21927e-16	5407.87	-2.21888	0.265215	-8.36635	5.94307e-17	7.48108e-15	5407.87	-1.57127	0.265385	-5.9207	3.20583e-09	7.9667e-08	VIT_17s0000g04750	AT1G73880.1	2.1e-120	431	1-to-1	NA	AT1G73880.1	UDP-glucosyl transferase 89B1	NA	"UGT89B1"	NA	UDP-glucosyl transferase 89B1	UDP-glucosyl transferase 89B1 (UGT89B1)%3B FUNCTIONS IN: in 7 functions%3B INVOLVED IN: metabolic process%3B LOCATED IN: cellular_component unknown%3B CONTAINS InterPro DOMAIN/s: UDP-glucuronosyl/UDP-glucosyltransferase (InterPro:IPR002213)%3B BEST Arabidopsis thaliana protein match is: UDP-Glycosyltransferase superfamily protein (TAIR:AT1G51210.1)%3B Has 6052 Blast hits to 5982 proteins in 308 s…	***	gene:2031565.UniProt:Q9C9B0	NA	'9.2.2.9.1'	'Secondary metabolism.phenolics.flavonoid synthesis and modification.flavonoid glycosylation.flavonol-3-O-glycoside-rhamnosyltransferase'	'Secondary metabolism.phenolics.flavonoid synthesis and modification.flavonoid glycosylation.flavonol-3-O-glycoside-rhamnosyltransferase (original description: none)'
Vitvi13g00058	14579.3	-1.32745	0.249078	-5.32945	9.85081e-08	2.83457e-05	14579.3	-2.51964	0.27863	-9.04296	1.52484e-19	3.28551e-17	14579.3	-1.97436	0.249108	-7.92574	2.26787e-15	1.96325e-13	14579.3	-2.20125	0.249162	-8.83462	1.00435e-18	1.40729e-16	VIT_13s0067g01070	AT2G40140.1	4.9e-182	636.7	1-to-many	AT2G40140.2	AT2G40140.1	zinc finger (CCCH-type) family protein	NA	"CZF1"	NA	NA	CZF1%3B CONTAINS InterPro DOMAIN/s: Zinc finger%2C CCCH-type (InterPro:IPR000571)%2C Ankyrin repeat-containing domain (InterPro:IPR020683)%2C Ankyrin repeat (InterPro:IPR002110)%3B BEST Arabidopsis thaliana protein match is: salt-inducible zinc finger 1 (TAIR:AT3G55980.1)%3B Has 1196 Blast hits to 1143 proteins in 183 species: Archae - 4%3B Bacteria - 47%3B Metazoa - 401%3B Fungi - 61%3B Plants -…	****	PMID:11118137.PMID:16258011.PMID:16925600.PMID:17609218.PMID:17722694.gene:2065057.UniProt:Q9XEE6	NA	'15.7.16'	'RNA biosynthesis.transcriptional activation.C3H zinc finger transcription factor'	'RNA biosynthesis.transcriptional activation.C3H zinc finger transcription factor (original description: none)'
Vitvi16g01424	242.382	-1.3292	0.328109	-4.05109	5.09799e-05	0.00303506	242.382	-2.99344	0.375368	-7.97467	1.52794e-15	1.60528e-13	242.382	-2.02693	0.330744	-6.12839	8.87714e-10	2.42974e-08	242.382	-2.89138	0.33902	-8.52866	1.48051e-17	1.76529e-15	VIT_16s0013g00990	AT5G51190.1	1.3e-40	165.2	1-to-1	NA	AT5G51190.1	Integrase-type DNA-binding superfamily protein	encodes a member of the ERF (ethylene response factor) subfamily B-3 of ERF/AP2 transcription factor family. The protein contains one AP2 domain. There are 18 members in this subfamily including ATERF-1%2C ATERF-2%2C AND ATERF-5.	NA	ERF105.ethylene response factor 105	NA	Integrase-type DNA-binding superfamily protein%3B CONTAINS InterPro DOMAIN/s: DNA-binding%2C integrase-type (InterPro:IPR016177)%2C Pathogenesis-related transcriptional factor/ERF%2C DNA-binding (InterPro:IPR001471)%3B BEST Arabidopsis thaliana protein match is: ethylene response factor 104 (TAIR:AT5G61600.1)%3B Has 30201 Blast hits to 17322 proteins in 780 species: Archae - 12%3B Bacteria - 1396…	*****	PMID:11118137.PMID:16280546.PMID:16407444.PMID:17722694.gene:2176186.UniProt:Q8VY90	VviERF6L5	'15.7.7.1'	'RNA biosynthesis.transcriptional activation.AP2/ERF superfamily.ERF-type transcription factor'	'RNA biosynthesis.transcriptional activation.AP2/ERF superfamily.ERF-type transcription factor (original description: none)'
Vitvi16g01435	230.138	-1.33643	0.335325	-3.98547	6.73458e-05	0.00370801	230.138	-1.94707	0.389888	-4.99392	5.91662e-07	1.1492e-05	230.138	-1.34244	0.333543	-4.0248	5.70238e-05	0.000453285	230.138	-1.69098	0.348143	-4.85714	1.19091e-06	1.64361e-05		AT5G51190.1	6.3e-36	149.8	1-to-1	NA	AT5G51190.1	Integrase-type DNA-binding superfamily protein	encodes a member of the ERF (ethylene response factor) subfamily B-3 of ERF/AP2 transcription factor family. The protein contains one AP2 domain. There are 18 members in this subfamily including ATERF-1%2C ATERF-2%2C AND ATERF-5.	NA	ERF105.ethylene response factor 105	NA	Integrase-type DNA-binding superfamily protein%3B CONTAINS InterPro DOMAIN/s: DNA-binding%2C integrase-type (InterPro:IPR016177)%2C Pathogenesis-related transcriptional factor/ERF%2C DNA-binding (InterPro:IPR001471)%3B BEST Arabidopsis thaliana protein match is: ethylene response factor 104 (TAIR:AT5G61600.1)%3B Has 30201 Blast hits to 17322 proteins in 780 species: Archae - 12%3B Bacteria - 1396…	*****	PMID:11118137.PMID:16280546.PMID:16407444.PMID:17722694.gene:2176186.UniProt:Q8VY90	NA	'15.7.7.1'	'RNA biosynthesis.transcriptional activation.AP2/ERF superfamily.ERF-type transcription factor'	'RNA biosynthesis.transcriptional activation.AP2/ERF superfamily.ERF-type transcription factor (original description: none)'
Vitvi15g00787	1493.21	-1.34073	0.336359	-3.98601	6.71928e-05	0.00370801	1493.21	-2.14872	0.367465	-5.84741	4.99285e-09	1.5462e-07	1493.21	-1.99814	0.338805	-5.89761	3.68805e-09	8.72045e-08	1493.21	-1.89008	0.328621	-5.75156	8.84235e-09	1.98102e-07		AT2G45600.1	3.4e-96	350.1	1-to-1	NA	AT2G45600.1	alpha/beta-Hydrolases superfamily protein	NA	NA	NA	NA	alpha/beta-Hydrolases superfamily protein%3B FUNCTIONS IN: hydrolase activity%3B INVOLVED IN: metabolic process%3B LOCATED IN: cellular_component unknown%3B EXPRESSED IN: 20 plant structures%3B EXPRESSED DURING: 8 growth stages%3B CONTAINS InterPro DOMAIN/s: Lipase%2C GDXG%2C active site (InterPro:IPR002168)%2C Alpha/beta hydrolase fold-3 (InterPro:IPR013094)%3B BEST Arabidopsis thaliana protein …	*****	PMID:16247729.gene:2043643.UniProt:O64640	NA	'35.1'	'not assigned.annotated'	'Probable carboxylesterase 8 OS=Arabidopsis thaliana (sp|o64640|cxe8_arath : 300.0)'
Vitvi12g00414	480.512	-1.35168	0.31368	-4.30909	1.63927e-05	0.00137187	480.512	-3.52821	0.355662	-9.92013	3.40305e-23	1.25395e-20	480.512	-1.94832	0.314378	-6.19737	5.74129e-10	1.65488e-08	480.512	-2.7291	0.312321	-8.7381	2.37059e-18	3.11074e-16	VIT_12s0059g01120	AT4G15417.1	2.7e-34	145.2	1-to-many	AT4G15417.2	AT4G15417.1	RNAse II-like 1	NA	"RTL1"	ATRTL1.RNAse II-like 1	RNAse II-like 1	RNAse II-like 1 (RTL1)%3B FUNCTIONS IN: RNA binding%2C ribonuclease III activity%3B INVOLVED IN: RNA processing%3B LOCATED IN: cellular_component unknown%3B EXPRESSED IN: root%3B CONTAINS InterPro DOMAIN/s: Ribonuclease III (InterPro:IPR000999)%3B BEST Arabidopsis thaliana protein match is: RNAse THREE-like protein 2 (TAIR:AT3G20420.1)%3B Has 6428 Blast hits to 6386 proteins in 2315 species: Arch…	***	gene:504953272.UniProt:F4JK37	NA	'35.1'	'not assigned.annotated'	'Ribonuclease 3-like protein 3 OS=Oryza sativa subsp. japonica (sp|q69kj0|rtl3_orysj : 120.0)'
Vitvi01g01865	234.991	-1.35175	0.361886	-3.7353	0.000187491	0.00809258	234.991	-2.37203	0.403226	-5.88263	4.03807e-09	1.28656e-07	234.991	-1.41655	0.360234	-3.93229	8.41391e-05	0.000632001	234.991	-2.37289	0.364953	-6.50191	7.93052e-11	2.70543e-09	VIT_01s0011g01350	AT4G20000.1	2.1e-08	57.8	1-to-1	NA	AT4G20000.1	VQ motif-containing protein	NA	NA	NA	NA	VQ motif-containing protein%3B CONTAINS InterPro DOMAIN/s: VQ (InterPro:IPR008889)%3B Has 92 Blast hits to 92 proteins in 13 species: Archae - 0%3B Bacteria - 0%3B Metazoa - 0%3B Fungi - 0%3B Plants - 92%3B Viruses - 0%3B Other Eukaryotes - 0 (source: NCBI BLink).	*****	gene:2119756.UniProt:O49427	NA	'35.2'	'not assigned.not annotated'	' no hits & (original description: none)'
Vitvi08g00630	1622.2	-1.35594	0.271787	-4.98896	6.07064e-07	0.000118765	1622.2	-2.8869	0.303841	-9.50133	2.07231e-21	5.60515e-19	1622.2	-2.22165	0.271394	-8.18609	2.69857e-16	2.90565e-14	1622.2	-2.72346	0.271442	-10.0333	1.08826e-23	3.13837e-21	VIT_08s0105g00200	AT3G11840.1	8.4e-96	349	1-to-1	NA	AT3G11840.1	E3 ubiquitin-protein ligase PUB24-like protein	Encodes a U-box-domain-containing E3 ubiquitin ligase that acts as a negative regulator of PAMP-triggered immunity.	"PUB24"	NA	plant U-box 24	plant U-box 24 (PUB24)%3B FUNCTIONS IN: ubiquitin-protein ligase activity%2C binding%3B INVOLVED IN: respiratory burst involved in defense response%2C protein autoubiquitination%2C response to chitin%2C defense response%3B LOCATED IN: ubiquitin ligase complex%3B EXPRESSED IN: 21 plant structures%3B EXPRESSED DURING: 10 growth stages%3B CONTAINS InterPro DOMAIN/s: U box domain (InterPro:IPR003613)…	****	PMID:17722694.gene:2081505.UniProt:Q9SF15	NA	'35.1'	'not assigned.annotated'	'E3 ubiquitin-protein ligase PUB24 OS=Arabidopsis thaliana (sp|q9sf15|pub24_arath : 337.0)'
Vitvi06g00454	2807.98	-1.35878	0.25971	-5.2319	1.67778e-07	4.31421e-05	2807.98	-2.59973	0.291045	-8.9324	4.16864e-19	8.21609e-17	2807.98	-1.93562	0.259575	-7.45688	8.85923e-14	5.45733e-12	2807.98	-2.6602	0.26027	-10.2209	1.59795e-24	4.95386e-22	VIT_06s0004g04580	AT2G45910.1	2.2e-61	237.3	1-to-many	AT2G45910.2	AT2G45910.1	U-box domain-containing protein kinase family protein	NA	NA	NA	NA	U-box domain-containing protein kinase family protein%3B FUNCTIONS IN: ubiquitin-protein ligase activity%2C protein serine/threonine kinase activity%2C protein kinase activity%2C kinase activity%2C ATP binding%3B INVOLVED IN: protein amino acid phosphorylation%2C response to stress%2C protein ubiquitination%3B LOCATED IN: ubiquitin ligase complex%3B EXPRESSED IN: 22 plant structures%3B EXPRESSED …	****	gene:2050668.UniProt:Q8GUH1	NA	'50.2.7'	'Enzyme classification.EC_2 transferases.EC_2.7 transferase transferring phosphorus-containing group'	'U-box domain-containing protein 33 OS=Arabidopsis thaliana (sp|q8guh1|pub33_arath : 232.0) & Enzyme classification.EC_2 transferases.EC_2.7 transferase transferring phosphorus-containing group(50.2.7 : 66.3) (original description: none)'
Vitvi19g00111	92394.6	-1.36471	0.313388	-4.35468	1.33262e-05	0.00119478	92394.6	-1.74276	0.350367	-4.9741	6.55511e-07	1.255e-05	92394.6	-2.30075	0.313411	-7.341	2.12006e-13	1.22218e-11	92394.6	-1.53824	0.313373	-4.90865	9.17073e-07	1.30042e-05	VIT_19s0014g01370	AT1G78850.1	5.1e-114	409.5	1-to-1	NA	AT1G78850.1	D-mannose binding lectin protein with Apple-like carbohydrate-binding domain-containing protein	curculin-like (mannose-binding) lectin family protein%2C low similarity to ser/thr protein kinase from Zea mays (GI:2598067)%3B contains Pfam lectin (probable mannose binding) domain PF01453 but not the protein kinase domain of the Z. mays protein	NA	NA	NA	D-mannose binding lectin protein with Apple-like carbohydrate-binding domain%3B FUNCTIONS IN: sugar binding%3B LOCATED IN: apoplast%2C cell wall%2C plasma membrane%2C plant-type cell wall%3B EXPRESSED IN: phloem%2C stem%2C guard cell%2C cultured cell%2C callus%3B CONTAINS InterPro DOMAIN/s: Curculin-like (mannose-binding) lectin (InterPro:IPR001480)%2C Apple-like (InterPro:IPR003609)%3B BEST Arab…	*****	PMID:15593128.PMID:17151019.PMID:17526915.PMID:18324730.PMID:18538804.gene:2037507.UniProt:Q9ZVA4	NA	'35.1'	'not assigned.annotated'	'Epidermis-specific secreted glycoprotein EP1 OS=Daucus carota (sp|q39688|ep1g_dauca : 451.0)'
Vitvi01g01993	226.345	-1.36816	0.310377	-4.40805	1.04305e-05	0.00100846	226.345	-2.60846	0.359856	-7.24864	4.20988e-13	2.7874e-11	226.345	-1.23868	0.312522	-3.96349	7.38614e-05	0.000565304	226.345	-2.31705	0.307344	-7.53897	4.7369e-14	3.06736e-12	VIT_01s0011g05680	AT1G67920.1	1.2e-12	71.2	1-to-1	NA	AT1G67920.1	hypothetical protein	NA	NA	NA	NA	unknown protein%3B BEST Arabidopsis thaliana protein match is: unknown protein (TAIR:AT1G24600.1)%3B Has 22 Blast hits to 22 proteins in 5 species: Archae - 0%3B Bacteria - 0%3B Metazoa - 0%3B Fungi - 0%3B Plants - 22%3B Viruses - 0%3B Other Eukaryotes - 0 (source: NCBI BLink).	*****	gene:2200260.UniProt:Q9C9V8	NA	'35.2'	'not assigned.not annotated'	' no hits & (original description: none)'
Vitvi02g00481	9039.58	-1.37221	0.325687	-4.21328	2.51686e-05	0.00179731	9039.58	-3.07307	0.36411	-8.43993	3.17524e-17	4.80539e-15	9039.58	-3.18594	0.32589	-9.77611	1.42587e-22	6.6346e-20	9039.58	-2.25373	0.325414	-6.92573	4.33734e-12	1.94522e-10	VIT_02s0241g00100	AT3G60780.1	3.6e-57	220.3	1-to-1	NA	AT3G60780.1	hypothetical protein (DUF1442)	NA	NA	NA	NA	Protein of unknown function (DUF1442)%3B CONTAINS InterPro DOMAIN/s: Protein of unknown function DUF1442 (InterPro:IPR009902)%3B BEST Arabidopsis thaliana protein match is: Protein of unknown function (DUF1442) (TAIR:AT2G45360.1)%3B Has 105 Blast hits to 105 proteins in 11 species: Archae - 0%3B Bacteria - 0%3B Metazoa - 0%3B Fungi - 0%3B Plants - 105%3B Viruses - 0%3B Other Eukaryotes - 0 (sourc…	*****	gene:2101910.UniProt:Q9LZY5	NA	'35.2'	'not assigned.not annotated'	' no hits & (original description: none)'
Vitvi08g02348	556.145	-1.3759	0.347867	-3.95524	7.64564e-05	0.00407953	556.145	-2.78682	0.389546	-7.15402	8.42726e-13	5.21354e-11	556.145	-1.47938	0.35289	-4.19217	2.76299e-05	0.000244134	556.145	-2.78783	0.348311	-8.00384	1.20601e-15	1.07591e-13	VIT_08s0007g06580	AT5G06740.1	2.1e-142	503.8	1-to-many	AT5G06740.2	AT5G06740.1	Concanavalin A-like lectin protein kinase family protein	NA	NA	LecRK-S.5.L-type lectin receptor kinase S.5	NA	Concanavalin A-like lectin protein kinase family protein%3B FUNCTIONS IN: in 6 functions%3B INVOLVED IN: protein amino acid phosphorylation%3B LOCATED IN: endomembrane system%3B EXPRESSED IN: root%3B CONTAINS InterPro DOMAIN/s: Legume lectin%2C beta chain (InterPro:IPR001220)%2C Protein kinase%2C ATP binding site (InterPro:IPR017441)%2C Serine/threonine-protein kinase-like domain (InterPro:IPR017…	***	gene:2170223.UniProt:Q9FG33	NA	'50.2.7'	'Enzyme classification.EC_2 transferases.EC_2.7 transferase transferring phosphorus-containing group'	'Probable L-type lectin-domain containing receptor kinase S.5 OS=Arabidopsis thaliana (sp|q9fg33|lrks5_arath : 495.0) & Enzyme classification.EC_2 transferases.EC_2.7 transferase transferring phosphorus-containing group(50.2.7 : 113.4) (original description: none)'
Vitvi19g00318	100.941	-1.3762	0.256972	-5.35542	8.53583e-08	2.52863e-05	100.941	-2.63732	0.325019	-8.11435	4.88389e-16	5.72225e-14	100.941	-2.74908	0.254049	-10.8211	2.73589e-27	3.24041e-24	100.941	-3.36446	0.311312	-10.8074	3.17713e-27	1.48672e-24	VVTU10757_at	NA	NA	NA	NA	NA	NA	NA	NA	NA	NA	NA	NA	NA	NA	NA	'35.2'	'not assigned.not annotated'	' no hits & (original description: none)'
Vitvi17g00656	3919.27	-1.37722	0.310258	-4.43895	9.04006e-06	0.000929818	3919.27	-3.05598	0.346442	-8.82105	1.13388e-18	2.08905e-16	3919.27	-1.9116	0.310069	-6.16509	7.04439e-10	1.98653e-08	3919.27	-2.68429	0.309718	-8.66689	4.44079e-18	5.648e-16	VIT_17s0000g06710	AT1G74360.1	4.3e-200	696.8	1-to-1	NA	AT1G74360.1	Leucine-rich repeat protein kinase family protein	NA	NA	NA	NA	Leucine-rich repeat protein kinase family protein%3B FUNCTIONS IN: protein serine/threonine kinase activity%2C protein kinase activity%2C ATP binding%3B INVOLVED IN: transmembrane receptor protein tyrosine kinase signaling pathway%2C protein amino acid phosphorylation%3B LOCATED IN: mitochondrion%3B EXPRESSED IN: 15 plant structures%3B EXPRESSED DURING: 9 growth stages%3B CONTAINS InterPro DOMAIN…	*****	PMID:14671022.gene:2019254.UniProt:C0LGJ1	NA	'26.6.1.1.3.1'	'External stimuli response.biotic stress.pathogen-associated molecular pattern (PAMP).PTI (pattern-triggered immunity) network.nematode elicitor response.NILR receptor kinase'	'External stimuli response.biotic stress.pathogen-associated molecular pattern (PAMP).PTI (pattern-triggered immunity) network.nematode elicitor response.NILR receptor kinase (original description: none)'
Vitvi15g01422	1529.89	-1.37902	0.375006	-3.67733	0.000235691	0.00968857	1529.89	-1.90965	0.428029	-4.46148	8.13951e-06	0.000113209	1529.89	-3.22845	0.376276	-8.58	9.48759e-18	1.42079e-15	1529.89	-1.65157	0.379353	-4.35364	1.33893e-05	0.00014041	VIT_15s0021g01270	AT5G51160.1	1.5e-15	81.3	1-to-1	NA	AT5G51160.1	Ankyrin repeat family protein	NA	NA	NA	NA	Ankyrin repeat family protein%3B CONTAINS InterPro DOMAIN/s: Ankyrin repeat-containing domain (InterPro:IPR020683)%2C Ankyrin repeat (InterPro:IPR002110)%3B BEST Arabidopsis thaliana protein match is: Ankyrin repeat family protein (TAIR:AT4G10720.1)%3B Has 23468 Blast hits to 11643 proteins in 579 species: Archae - 38%3B Bacteria - 1696%3B Metazoa - 12874%3B Fungi - 1168%3B Plants - 2550%3B Virus…	*****	gene:2176251.UniProt:Q9LU58	NA	'35.2'	'not assigned.not annotated'	' no hits & (original description: none)'
Vitvi18g00843	2208.92	-1.3795	0.370452	-3.72384	0.000196217	0.00836467	2208.92	-2.87979	0.414322	-6.95059	3.63753e-12	2.02816e-10	2208.92	-3.97908	0.37097	-10.7261	7.67316e-27	7.68998e-24	2208.92	-2.83419	0.370213	-7.65557	1.9245e-14	1.35211e-12	VIT_18s0001g11170	AT4G37260.1	2.3e-43	174.1	1-to-1	NA	AT4G37260.1	myb domain protein 73	Member of the R2R3 factor gene family.	"MYB73"	ATMYB73	myb domain protein 73	myb domain protein 73 (MYB73)%3B CONTAINS InterPro DOMAIN/s: SANT%2C DNA-binding (InterPro:IPR001005)%2C Homeodomain-like (InterPro:IPR009057)%2C Myb%2C DNA-binding (InterPro:IPR014778)%2C HTH transcriptional regulator%2C Myb-type%2C DNA-binding (InterPro:IPR017930)%2C Homeodomain-related (InterPro:IPR012287)%2C Myb transcription factor (InterPro:IPR015495)%3B BEST Arabidopsis thaliana protein ma…	*****	PMID:11118137.PMID:16463103.PMID:17722694.gene:2115059.UniProt:O23160	"VviMYB175"	'15.7.2.1'	'RNA biosynthesis.transcriptional activation.MYB superfamily.MYB transcription factor'	'RNA biosynthesis.transcriptional activation.MYB superfamily.MYB transcription factor (original description: none)'
Vitvi16g01444	4454.89	-1.39052	0.373747	-3.72049	0.000198834	0.00844643	4454.89	-2.47975	0.417518	-5.93928	2.86279e-09	9.3316e-08	4454.89	-2.03001	0.37355	-5.43437	5.49902e-08	9.74086e-07	4454.89	-1.5749	0.373324	-4.21857	2.45857e-05	0.000237442	VIT_16s0013g01080	AT5G51190.1	1.1e-38	159.1	1-to-1	NA	AT5G51190.1	Integrase-type DNA-binding superfamily protein	encodes a member of the ERF (ethylene response factor) subfamily B-3 of ERF/AP2 transcription factor family. The protein contains one AP2 domain. There are 18 members in this subfamily including ATERF-1%2C ATERF-2%2C AND ATERF-5.	NA	ERF105.ethylene response factor 105	NA	Integrase-type DNA-binding superfamily protein%3B CONTAINS InterPro DOMAIN/s: DNA-binding%2C integrase-type (InterPro:IPR016177)%2C Pathogenesis-related transcriptional factor/ERF%2C DNA-binding (InterPro:IPR001471)%3B BEST Arabidopsis thaliana protein match is: ethylene response factor 104 (TAIR:AT5G61600.1)%3B Has 30201 Blast hits to 17322 proteins in 780 species: Archae - 12%3B Bacteria - 1396…	*****	PMID:11118137.PMID:16280546.PMID:16407444.PMID:17722694.gene:2176186.UniProt:Q8VY90	NA	'15.7.7.1'	'RNA biosynthesis.transcriptional activation.AP2/ERF superfamily.ERF-type transcription factor'	'RNA biosynthesis.transcriptional activation.AP2/ERF superfamily.ERF-type transcription factor (original description: none)'
Vitvi11g00417	864.136	-1.39516	0.252117	-5.53377	3.1342e-08	1.16549e-05	864.136	-1.78452	0.283215	-6.30094	2.95844e-10	1.20349e-08	864.136	-1.69789	0.252107	-6.73479	1.64164e-11	6.47144e-10	864.136	-1.76643	0.251977	-7.01028	2.37838e-12	1.11928e-10	VIT_11s0016g04720	AT4G30380.1	1.3e-06	54.7	1-to-many	AT4G30380.2	AT4G30380.1	Barwin-related endoglucanase	Encodes a Plant Natriuretic Peptide (PNP). PNPs are a class of systemically mobile molecules distantly related to expansins%3B their biological role has remained elusive.	NA	NA	NA	Barwin-related endoglucanase%3B FUNCTIONS IN: molecular_function unknown%3B INVOLVED IN: biological_process unknown%3B LOCATED IN: endomembrane system%3B CONTAINS InterPro DOMAIN/s: Barwin-related endoglucanase (InterPro:IPR009009)%2C Pollen allergen%2C N-terminal (InterPro:IPR014734)%2C Rare lipoprotein A (InterPro:IPR005132)%2C Expansin 45%2C endoglucanase-like (InterPro:IPR007112)%3B BEST Arab…	**	gene:2118655	NA	'35.2'	'not assigned.not annotated'	' no hits & (original description: none)'
Vitvi10g01790	824.399	-1.39771	0.295245	-4.73407	2.20062e-06	0.000310697	824.399	-2.26263	0.331765	-6.81998	9.10542e-12	4.77331e-10	824.399	-1.78292	0.294883	-6.0462	1.48306e-09	3.84901e-08	824.399	-2.34806	0.294232	-7.98032	1.45953e-15	1.28361e-13	VIT_10s0003g00980	AT2G31090.1	2.4e-09	60.5	1-to-1	NA	AT2G31090.1	transmembrane protein	NA	NA	NA	NA	unknown protein%3B FUNCTIONS IN: molecular_function unknown%3B INVOLVED IN: biological_process unknown%3B LOCATED IN: endomembrane system%3B EXPRESSED IN: 24 plant structures%3B EXPRESSED DURING: 13 growth stages%3B BEST Arabidopsis thaliana protein match is: unknown protein (TAIR:AT2G20562.1)%3B Has 70 Blast hits to 70 proteins in 13 species: Archae - 0%3B Bacteria - 0%3B Metazoa - 0%3B Fungi - …	*****	gene:2055891.UniProt:O82275	NA	'35.2'	'not assigned.not annotated'	' no hits & (original description: none)'
Vitvi03g00783	3045.73	-1.40076	0.338088	-4.14319	3.42502e-05	0.00225575	3045.73	-2.18097	0.378209	-5.76658	8.08966e-09	2.40561e-07	3045.73	-1.2272	0.338449	-3.62595	0.000287901	0.00180073	3045.73	-2.13519	0.338131	-6.31467	2.70741e-10	8.37238e-09	VIT_03s0088g01180	AT1G09970.2	1.1e-87	323.2	1-to-1	NA	AT1G09970.2	Leucine-rich receptor-like protein kinase family protein	RLK7 belongs to a leucine-rich repeat class of receptor-likekinase (LRR-RLKs). It is involved in the control of germination speed and the tolerance to oxidant stress.	"LRR XI-23"	NA	NA	LRR XI-23%3B FUNCTIONS IN: protein serine/threonine kinase activity%2C protein kinase activity%2C kinase activity%2C ATP binding%3B INVOLVED IN: protein amino acid phosphorylation%2C transmembrane receptor protein tyrosine kinase signaling pathway%2C protein amino acid autophosphorylation%3B LOCATED IN: plasma membrane%3B EXPRESSED IN: 22 plant structures%3B EXPRESSED DURING: 14 growth stages%3B …	*****	PMID:16280546.PMID:17317660.gene:1005715557.UniProt:F4I2N7	NA	'11.10.1.1.2'	'Phytohormones.signalling peptides.NCRP (non-cysteine-rich-peptide) category.PIP/PIPL family.RLK7 peptide receptor'	'Phytohormones.signalling peptides.NCRP (non-cysteine-rich-peptide) category.PIP/PIPL family.RLK7 peptide receptor (original description: none)'
Vitvi17g00293	254.212	-1.40201	0.263679	-5.3171	1.05436e-07	2.92931e-05	254.212	-3.67015	0.308284	-11.9051	1.11335e-32	3.53838e-29	254.212	-2.0031	0.259844	-7.70887	1.2694e-14	9.45049e-13	254.212	-3.40502	0.272576	-12.492	8.25316e-36	1.57451e-32	VIT_17s0000g03390	AT1G73805.1	4.1e-44	178.7	1-to-1	NA	AT1G73805.1	Calmodulin binding protein-like protein	Encodes SAR Deficient 1 (SARD1)%2C a key regulator for ICS1 (Isochorismate Synthase 1) induction and salicylic acid (SA) synthesis.	"SARD1"	NA	SAR Deficient 1	Calmodulin binding protein-like%3B CONTAINS InterPro DOMAIN/s: Calmodulin binding protein-like (InterPro:IPR012416)%3B BEST Arabidopsis thaliana protein match is: Calmodulin-binding protein (TAIR:AT5G57580.1)%3B Has 30201 Blast hits to 17322 proteins in 780 species: Archae - 12%3B Bacteria - 1396%3B Metazoa - 17338%3B Fungi - 3422%3B Plants - 5037%3B Viruses - 0%3B Other Eukaryotes - 2996 (source…	****	gene:3689797.UniProt:Q9C9T2	NA	'35.1'	'not assigned.annotated'	'Protein SAR DEFICIENT 1 OS=Arabidopsis thaliana (sp|q9c9t2|sard1_arath : 181.0)'
Vitvi01g01651	393.898	-1.4104	0.265138	-5.31948	1.04065e-07	2.92484e-05	393.898	-2.44109	0.3033	-8.04841	8.38744e-16	9.23163e-14	393.898	-1.36482	0.262672	-5.19591	2.03721e-07	3.15223e-06	393.898	-2.07874	0.266116	-7.81139	5.65604e-15	4.41778e-13	VIT_01s0010g03640	AT5G43260.1	5.4e-34	142.5	1-to-1	NA	AT5G43260.1	chaperone protein dnaJ-like protein	NA	NA	NA	NA	chaperone protein dnaJ-related%3B Has 30201 Blast hits to 17322 proteins in 780 species: Archae - 12%3B Bacteria - 1396%3B Metazoa - 17338%3B Fungi - 3422%3B Plants - 5037%3B Viruses - 0%3B Other Eukaryotes - 2996 (source: NCBI BLink).	*****	gene:2169242.UniProt:Q94CB5	NA	'35.2'	'not assigned.not annotated'	' no hits & (original description: none)'
Vitvi16g01926	3884.7	-1.41148	0.319125	-4.42298	9.73468e-06	0.00097433	3884.7	-3.35572	0.359109	-9.34457	9.22601e-21	2.32249e-18	3884.7	-1.71269	0.319481	-5.36087	8.28221e-08	1.41052e-06	3884.7	-3.06966	0.320011	-9.59235	8.61006e-22	1.87314e-19	VIT_16s0050g01240	AT1G01490.1	4.7e-17	87.4	1-to-many	AT1G01490.2.AT1G01490.4	AT1G01490.1	Heavy metal transport/detoxification superfamily protein	NA	NA	NA	NA	Heavy metal transport/detoxification superfamily protein %3B FUNCTIONS IN: metal ion binding%3B INVOLVED IN: metal ion transport%3B LOCATED IN: cellular_component unknown%3B EXPRESSED IN: 22 plant structures%3B EXPRESSED DURING: 14 growth stages%3B CONTAINS InterPro DOMAIN/s: Heavy metal transport/detoxification protein (InterPro:IPR006121)%3B BEST Arabidopsis thaliana protein match is: Heavy met…	****	gene:2025420.UniProt:O03982	NA	'35.2'	'not assigned.not annotated'	' no hits & (original description: none)'
Vitvi18g02161	567.395	-1.41324	0.251732	-5.61406	1.97636e-08	8.23629e-06	567.395	-3.57787	0.287788	-12.4323	1.74511e-35	6.33849e-32	567.395	-2.02816	0.264323	-7.67306	1.67938e-14	1.20218e-12	567.395	-3.54515	0.25618	-13.8385	1.49322e-43	9.25833e-40		AT5G46450.1	4e-38	158.3	1-to-many	AT5G46450.2.AT5G46450.3	AT5G46450.1	Disease resistance protein (TIR-NBS-LRR class) family	NA	NA	NA	NA	Disease resistance protein (TIR-NBS-LRR class) family%3B FUNCTIONS IN: transmembrane receptor activity%2C nucleoside-triphosphatase activity%2C nucleotide binding%2C ATP binding%3B INVOLVED IN: signal transduction%2C defense response%2C apoptosis%2C innate immune response%3B LOCATED IN: intrinsic to membrane%3B EXPRESSED IN: 18 plant structures%3B EXPRESSED DURING: 11 growth stages%3B CONTAINS In…	***	gene:2151490.UniProt:Q9FHG0	NA	'26.6.2.1'	'External stimuli response.biotic stress.pathogen effector.NLR effector receptor'	'External stimuli response.biotic stress.pathogen effector.NLR effector receptor (original description: none)'
Vitvi08g02349	734.323	-1.42039	0.286009	-4.96625	6.82587e-07	0.000128897	734.323	-2.43528	0.318271	-7.6516	1.98491e-14	1.6935e-12	734.323	-3.00185	0.289394	-10.3729	3.29491e-25	2.45301e-22	734.323	-2.09814	0.283143	-7.41016	1.26151e-13	7.53895e-12	VIT_08s0007g06620	AT2G42060.1	1e-57	221.9	1-to-1	NA	AT2G42060.1	Cysteine/Histidine-rich C1 domain family protein	NA	NA	NA	NA	Cysteine/Histidine-rich C1 domain family protein%3B INVOLVED IN: intracellular signaling pathway%3B LOCATED IN: cellular_component unknown%3B EXPRESSED IN: root%3B CONTAINS InterPro DOMAIN/s: Protein kinase C-like%2C phorbol ester/diacylglycerol binding (InterPro:IPR002219)%2C C1-like (InterPro:IPR011424)%3B BEST Arabidopsis thaliana protein match is: Cysteine/Histidine-rich C1 domain family prot…	*****	gene:2064550.UniProt:P93741	NA	'35.2'	'not assigned.not annotated'	' no hits & (original description: none)'
Vitvi07g01602	1664.15	-1.42522	0.343407	-4.15023	3.32135e-05	0.00221769	1664.15	-2.83282	0.385622	-7.34609	2.04085e-13	1.44411e-11	1664.15	-3.84316	0.344775	-11.1469	7.41851e-29	1.07391e-25	1664.15	-2.94026	0.345575	-8.50831	1.76488e-17	2.07445e-15	VIT_07s0129g00240	AT5G67450.1	1.9e-39	161.4	1-to-1	NA	AT5G67450.1	zinc-finger protein 1	Encodes zinc-finger protein. mRNA levels are elevated in response to low temperature%2C cold temperatures and high salt. The protein is localized to the nucleus and acts as a transcriptional repressor.	"ZF1"	AZF1.zinc-finger protein 1	zinc-finger protein 1	zinc-finger protein 1 (ZF1)%3B CONTAINS InterPro DOMAIN/s: Zinc finger%2C C2H2-like (InterPro:IPR015880)%2C Zinc finger%2C C2H2-type (InterPro:IPR007087)%3B BEST Arabidopsis thaliana protein match is: C2H2 and C2HC zinc fingers superfamily protein (TAIR:AT3G49930.1)%3B Has 1807 Blast hits to 1807 proteins in 277 species: Archae - 0%3B Bacteria - 0%3B Metazoa - 736%3B Fungi - 347%3B Plants - 385%3…	*****	PMID:11118137.PMID:17722694.gene:2158191.UniProt:Q9SSW1	NA	'15.7.15'	'RNA biosynthesis.transcriptional activation.C2H2 zinc finger transcription factor'	'RNA biosynthesis.transcriptional activation.C2H2 zinc finger transcription factor (original description: none)'
Vitvi12g00121	3522.22	-1.43633	0.223437	-6.42835	1.28999e-10	1.73225e-07	3522.22	-2.23647	0.250485	-8.92856	4.31576e-19	8.44064e-17	3522.22	-1.48739	0.223407	-6.65775	2.78048e-11	1.03752e-09	3522.22	-1.79474	0.223532	-8.02902	9.82557e-16	8.86124e-14	VIT_12s0028g01410	AT4G18880.1	1.6e-49	196.4	1-to-1	NA	AT4G18880.1	heat shock transcription factor A4A	Encodes a member of Heat Stress Transcription Factor(Hsf) family that is a substrate of the MPK3/MPK6 signaling and regulates stress responses.	"HSF A4A"	AT-HSFA4A.ARABIDOPSIS THALIANA HEAT SHOCK TRANSCRIPTION FACTOR A4A	heat shock transcription factor A4A	heat shock transcription factor A4A (HSF A4A)%3B FUNCTIONS IN: DNA binding%2C sequence-specific DNA binding transcription factor activity%3B INVOLVED IN: response to chitin%3B LOCATED IN: nucleus%3B EXPRESSED IN: 23 plant structures%3B EXPRESSED DURING: 13 growth stages%3B CONTAINS InterPro DOMAIN/s: Winged helix-turn-helix transcription repressor DNA-binding (InterPro:IPR011991)%2C Heat shock fa…	*****	PMID:11118137.PMID:17722694.gene:2117138.UniProt:O49403	NA	'15.7.13'	'RNA biosynthesis.transcriptional activation.HSF (heat shock) transcription factor'	'RNA biosynthesis.transcriptional activation.HSF (heat shock) transcription factor (original description: none)'
Vitvi01g00993	6416.37	-1.43857	0.288391	-4.98825	6.09276e-07	0.000118765	6416.37	-2.83227	0.323201	-8.76317	1.89835e-18	3.42308e-16	6416.37	-3.08627	0.288582	-10.6946	1.07907e-26	1.04138e-23	6416.37	-3.15976	0.28889	-10.9376	7.62104e-28	4.02147e-25	VIT_01s0026g02310	AT1G69640.1	2e-90	332.8	1-to-1	NA	AT1G69640.1	sphingoid base hydroxylase 1	Encodes one of the two redundant sphingoid base hydroxylases (SBH). Involved in sphingolipid trihydroxy long-chain base (4-hydroxysphinganine) biosynthesis. Double mutants of SBHs were dwarfed and not able to progress from vegetative to reproductive growth.	"SBH1"	NA	sphingoid base hydroxylase 1	sphingoid base hydroxylase 1 (SBH1)%3B CONTAINS InterPro DOMAIN/s: Fatty acid hydroxylase (InterPro:IPR006694)%3B BEST Arabidopsis thaliana protein match is: sphingoid base hydroxylase 2 (TAIR:AT1G14290.1)%3B Has 2400 Blast hits to 2339 proteins in 395 species: Archae - 0%3B Bacteria - 406%3B Metazoa - 416%3B Fungi - 708%3B Plants - 429%3B Viruses - 3%3B Other Eukaryotes - 438 (source: NCBI BLink…	****	PMID:11297741.PMID:18643979.gene:3435758.UniProt:Q8VYI1	NA	'5.4.3'	'Lipid metabolism.sphingolipid metabolism.sphingobase hydroxylase'	'Lipid metabolism.sphingolipid metabolism.sphingobase hydroxylase (original description: none)'
Vitvi19g00235	41.6585	-1.44196	0.33797	-4.26653	1.9854e-05	0.00153811	41.6585	-2.90145	0.508794	-5.7026	1.17995e-08	3.38603e-07	41.6585	-1.43103	0.345978	-4.13618	3.53135e-05	0.000301792	41.6585	-1.64398	0.375513	-4.37797	1.19791e-05	0.000127142	VIT_19s0014g02850	AT1G23220.1	1.1e-20	99	1-to-1	NA	AT1G23220.1	Dynein light chain type 1 family protein	NA	NA	NA	NA	Dynein light chain type 1 family protein%3B FUNCTIONS IN: microtubule motor activity%3B INVOLVED IN: microtubule-based process%3B LOCATED IN: microtubule associated complex%3B EXPRESSED IN: 23 plant structures%3B EXPRESSED DURING: 13 growth stages%3B CONTAINS InterPro DOMAIN/s: Dynein light chain%2C type 1/2 (InterPro:IPR001372)%3B BEST Arabidopsis thaliana protein match is: Dynein light chain ty…	****	gene:3692752.UniProt:Q9LR39	NA	'35.2'	'not assigned.not annotated'	' no hits & (original description: none)'
Vitvi02g00717	6088.41	-1.44507	0.277825	-5.20138	1.97814e-07	4.78136e-05	6088.41	-2.8023	0.311412	-8.9987	2.28403e-19	4.7993e-17	6088.41	-1.84203	0.277766	-6.6316	3.32072e-11	1.2187e-09	6088.41	-2.58794	0.278073	-9.30668	1.31888e-20	2.38755e-18	VIT_02s0012g01570	AT2G23910.1	7.6e-33	140.6	1-to-many	AT2G23910.2.AT2G23910.4	AT2G23910.1	NAD(P)-binding Rossmann-fold superfamily protein	NA	NA	NA	NA	NAD(P)-binding Rossmann-fold superfamily protein%3B FUNCTIONS IN: coenzyme binding%2C binding%2C cinnamoyl-CoA reductase activity%2C catalytic activity%3B INVOLVED IN: lignin biosynthetic process%2C response to karrikin%3B LOCATED IN: cellular_component unknown%3B EXPRESSED IN: 19 plant structures%3B EXPRESSED DURING: 13 growth stages%3B CONTAINS InterPro DOMAIN/s: NAD-dependent epimerase/dehydra…	****	gene:2061410.UniProt:O82219	4CL	'35.2'	'not assigned.not annotated'	' no hits & (original description: none)'
Vitvi14g02907	579.26	-1.45337	0.384771	-3.77722	0.000158589	0.0070855	579.26	-2.01297	0.421895	-4.77127	1.83072e-06	3.08048e-05	579.26	-2.69033	0.377162	-7.13308	9.81507e-13	4.85296e-11	579.26	-1.62308	0.375274	-4.32506	1.52493e-05	0.000157124	VIT_14s0083g00670	AT4G25760.1	3.4e-06	49.7	1-to-1	NA	AT4G25760.1	glutamine dumper 2	Encodes a member of the GDU (glutamine dumper) family proteins involved in amino acid export: At4g31730 (GDU1)%2C At4g25760 (GDU2)%2C At5g57685 (GDU3)%2C At2g24762 (GDU4)%2C At5g24920 (GDU5)%2C At3g30725 (GDU6) and At5g38770 (GDU7).	"GDU2"	ATGDU2.glutamine dumper 2	glutamine dumper 2	glutamine dumper 2 (GDU2)%3B BEST Arabidopsis thaliana protein match is: glutamine dumper 3 (TAIR:AT5G57685.1)%3B Has 30201 Blast hits to 17322 proteins in 780 species: Archae - 12%3B Bacteria - 1396%3B Metazoa - 17338%3B Fungi - 3422%3B Plants - 5037%3B Viruses - 0%3B Other Eukaryotes - 2996 (source: NCBI BLink).	*****	gene:2117516.UniProt:Q9SW07	NA	'35.2'	'not assigned.not annotated'	' no hits & (original description: none)'
Vitvi05g00041	3760.99	-1.45473	0.285105	-5.10241	3.35352e-07	7.43651e-05	3760.99	-3.33489	0.319725	-10.4305	1.79934e-25	9.53086e-23	3760.99	-2.65021	0.285445	-9.2845	1.62466e-20	4.7566e-18	3760.99	-3.1585	0.285981	-11.0444	2.3321e-28	1.31451e-25	VIT_05s0077g01970	AT3G16720.1	1.7e-41	168.7	1-to-1	NA	AT3G16720.1	TOXICOS EN LEVADURA 2	RING-H2 protein induced after exposure to chitin or inactivated crude cellulase preparations.	"ATL2"	TL2.TOXICOS EN LEVADURA 2	TOXICOS EN LEVADURA 2	TOXICOS EN LEVADURA 2 (ATL2)%3B FUNCTIONS IN: zinc ion binding%3B INVOLVED IN: response to chitin%2C defense response%3B EXPRESSED IN: 22 plant structures%3B EXPRESSED DURING: 13 growth stages%3B CONTAINS InterPro DOMAIN/s: Zinc finger%2C RING-type (InterPro:IPR001841)%2C Zinc finger%2C C3HC4 RING-type (InterPro:IPR018957)%3B BEST Arabidopsis thaliana protein match is: RING/U-box superfamily prot…	*****	PMID:16897085.PMID:17722694.gene:2089397.UniProt:Q8L9T5	NA	'19.4.1.5.3.4'	'Protein degradation.peptide tagging.Ubiquitin (UBQ)-anchor addition (ubiquitylation).UBQ-ligase E3 activities.RING-domain E3 ligase activities.RING-H2-type E3 ligase'	'Protein degradation.peptide tagging.Ubiquitin (UBQ)-anchor addition (ubiquitylation).UBQ-ligase E3 activities.RING-domain E3 ligase activities.RING-H2-type E3 ligase (original description: none)'
Vitvi13g00015	12336.1	-1.46072	0.350658	-4.16564	3.10475e-05	0.00212855	12336.1	-3.23367	0.392333	-8.24216	1.69125e-16	2.09756e-14	12336.1	-1.83006	0.35059	-5.21994	1.78983e-07	2.80781e-06	12336.1	-2.75747	0.350826	-7.85994	3.84315e-15	3.13533e-13	VIT_13s0067g00260	AT2G40000.1	4.3e-146	516.5	1-to-1	NA	AT2G40000.1	ortholog of sugar beet HS1 PRO-1 2	NA	"HSPRO2"	ATHSPRO2.ARABIDOPSIS ORTHOLOG OF SUGAR BEET HS1 PRO-1 2	ortholog of sugar beet HS1 PRO-1 2	ortholog of sugar beet HS1 PRO-1 2 (HSPRO2)%3B CONTAINS InterPro DOMAIN/s: Hs1pro-1%2C C-terminal (InterPro:IPR009743)%2C Hs1pro-1%2C N-terminal (InterPro:IPR009869)%3B BEST Arabidopsis thaliana protein match is: Hs1pro-1 protein (TAIR:AT3G55840.1)%3B Has 71 Blast hits to 71 proteins in 18 species: Archae - 0%3B Bacteria - 0%3B Metazoa - 0%3B Fungi - 0%3B Plants - 60%3B Viruses - 0%3B Other Eukar…	*****	gene:2061220.UniProt:O04203	NA	'35.1'	'not assigned.annotated'	'Nematode resistance protein-like HSPRO2 OS=Arabidopsis thaliana (sp|o04203|hspr2_arath : 492.0)'
Vitvi02g01464	3960.69	-1.46074	0.323792	-4.51137	6.44114e-06	0.000714168	3960.69	-2.62376	0.364283	-7.20253	5.91049e-13	3.80441e-11	3960.69	-1.68658	0.323797	-5.20875	1.90116e-07	2.96755e-06	3960.69	-2.06559	0.324315	-6.36908	1.9016e-10	6.0641e-09	VIT_02s0236g00100	AT4G33550.1	1.9e-07	54.7	1-to-1	NA	AT4G33550.1	Bifunctional inhibitor/lipid-transfer protein/seed storage 2S albumin superfamily protein	NA	NA	NA	NA	Bifunctional inhibitor/lipid-transfer protein/seed storage 2S albumin superfamily protein%3B FUNCTIONS IN: lipid binding%3B INVOLVED IN: lipid transport%3B LOCATED IN: endomembrane system%3B EXPRESSED IN: 15 plant structures%3B EXPRESSED DURING: 6 growth stages%3B CONTAINS InterPro DOMAIN/s: Bifunctional inhibitor/plant lipid transfer protein/seed storage (InterPro:IPR016140)%2C Plant lipid trans…	*****	gene:2134172.UniProt:Q6NLG8	NA	'35.2'	'not assigned.not annotated'	' no hits & (original description: none)'
Vitvi01g00475	1271.09	-1.47249	0.273139	-5.39101	7.00611e-08	2.17108e-05	1271.09	-2.04884	0.30409	-6.73761	1.61012e-11	8.07442e-10	1271.09	-3.45989	0.274165	-12.6198	1.64315e-36	8.56312e-33	1271.09	-2.05904	0.271896	-7.57288	3.6504e-14	2.41423e-12	VIT_01s0011g05580	AT3G17840.1	9.8e-79	293.5	1-to-1	NA	AT3G17840.1	receptor-like kinase 902	Encodes a receptor-like kinase found at the cell surface of various tissues. Its function remains unknown.	"RLK902"	NA	receptor-like kinase 902	receptor-like kinase 902 (RLK902)%3B FUNCTIONS IN: protein serine/threonine kinase activity%2C kinase activity%2C ATP binding%3B INVOLVED IN: transmembrane receptor protein tyrosine kinase signaling pathway%2C protein amino acid phosphorylation%3B LOCATED IN: plasma membrane%3B EXPRESSED IN: 28 plant structures%3B EXPRESSED DURING: 13 growth stages%3B CONTAINS InterPro DOMAIN/s: Protein kinase%2C…	****	PMID:14506206.PMID:15388970.PMID:16280546.PMID:16618929.PMID:17317660.PMID:17397506.PMID:17644812.PMID:21075962.gene:2088499.UniProt:Q9LVI6	NA	'50.2.7'	'Enzyme classification.EC_2 transferases.EC_2.7 transferase transferring phosphorus-containing group'	'Probable inactive receptor kinase RLK902 OS=Arabidopsis thaliana (sp|q9lvi6|rlk90_arath : 325.0) & Enzyme classification.EC_2 transferases.EC_2.7 transferase transferring phosphorus-containing group(50.2.7 : 54.2) (original description: none)'
Vitvi12g00678	1048.48	-1.47432	0.388377	-3.7961	0.000146987	0.00667826	1048.48	-3.5405	0.430418	-8.22574	1.93997e-16	2.35998e-14	1048.48	-3.02187	0.387903	-7.79028	6.68628e-15	5.2163e-13	1048.48	-3.63537	0.385379	-9.43323	3.97636e-21	8.0177e-19		AT3G22910.1	4e-85	314.7	1-to-1	NA	AT3G22910.1	ATPase E1-E2 type family protein / haloacid dehalogenase-like hydrolase family protein	NA	NA	ACA13.auto-inhibited Ca2+ ATPase 13	NA	ATPase E1-E2 type family protein / haloacid dehalogenase-like hydrolase family protein%3B FUNCTIONS IN: calcium-transporting ATPase activity%2C calmodulin binding%3B INVOLVED IN: cation transport%2C calcium ion transport%2C metabolic process%2C ATP biosynthetic process%3B LOCATED IN: membrane%3B EXPRESSED IN: 12 plant structures%3B EXPRESSED DURING: LP.04 four leaves visible%2C 4 anthesis%2C C gl…	***	PMID:11782485.PMID:12805592.gene:2084577.UniProt:Q9LIK7	NA	'35.1'	'not assigned.annotated'	'Calcium-transporting ATPase 12. plasma membrane-type OS=Arabidopsis thaliana (sp|q9ly77|aca12_arath : 234.0)'
Vitvi11g00156	1886.76	-1.4748	0.26586	-5.54726	2.90182e-08	1.11333e-05	1886.76	-3.08707	0.299401	-10.3108	6.29787e-25	3.0212e-22	1886.76	-1.32855	0.267088	-4.97422	6.55119e-07	9.01766e-06	1886.76	-3.03814	0.267013	-11.3782	5.36697e-30	3.91489e-27	VIT_11s0016g01970	AT2G26190.1	3e-84	312	1-to-many	AT2G26190.3	AT2G26190.1	calmodulin-binding family protein	NA	NA	NA	NA	calmodulin-binding family protein%3B FUNCTIONS IN: calmodulin binding%3B INVOLVED IN: N-terminal protein myristoylation%3B EXPRESSED IN: 22 plant structures%3B EXPRESSED DURING: 13 growth stages%3B CONTAINS InterPro DOMAIN/s: IQ calmodulin-binding region (InterPro:IPR000048)%3B BEST Arabidopsis thaliana protein match is: calmodulin-binding family protein (TAIR:AT4G33050.3)%3B Has 368 Blast hits t…	****	PMID:12912986.gene:2057764.UniProt:O64851	NA	'35.1'	'not assigned.annotated'	'IQ domain-containing protein IQM4 OS=Arabidopsis thaliana (sp|o64851|iqm4_arath : 241.0)'
Vitvi09g00462	2008.37	-1.47532	0.258221	-5.71339	1.10746e-08	5.46292e-06	2008.37	-3.31998	0.291627	-11.3843	5.00487e-30	7.48523e-27	2008.37	-1.83875	0.259008	-7.0992	1.25481e-12	6.08873e-11	2008.37	-3.10934	0.260883	-11.9185	9.47887e-33	1.23729e-29	VIT_09s0002g05400	AT1G15520.1	7.4e-149	527.7	1-to-many	AT1G15520.2	AT1G15520.1	pleiotropic drug resistance 12	ABC transporter family involved in ABA transport and resistance to lead. Localizes to plasma membrane. Upregulated by lead. Expressed in leaves%2C flowers%2C stomata and roots.	"ABCG40"	ATABCG40.Arabidopsis thaliana ATP-binding cassette G40.ATPDR12.PLEIOTROPIC DRUG RESISTANCE 12.PDR12.pleiotropic drug resistance 12	ATP-binding cassette G40	pleiotropic drug resistance 12 (PDR12)%3B CONTAINS InterPro DOMAIN/s: ATPase%2C AAA+ type%2C core (InterPro:IPR003593)%2C ABC transporter-like (InterPro:IPR003439)%2C Plant PDR ABC transporter associated (InterPro:IPR013581)%2C ABC-2 type transporter (InterPro:IPR013525)%3B BEST Arabidopsis thaliana protein match is: pleiotropic drug resistance 11 (TAIR:AT1G66950.1)%3B Has 377983 Blast hits to 27…	****	PMID:12430018.PMID:16506311.PMID:17164256.PMID:18334669.gene:2196592.UniProt:Q9M9E1	NA	'35.1'	'not assigned.annotated'	'Pleiotropic drug resistance protein 1 OS=Nicotiana tabacum (sp|q76cu2|pdr1_tobac : 281.0)'
Vitvi06g01546	2228.83	-1.47572	0.314508	-4.69217	2.70324e-06	0.000355288	2228.83	-2.31053	0.352724	-6.55052	5.73355e-11	2.63608e-09	2228.83	-1.73732	0.314756	-5.51957	3.3983e-08	6.32948e-07	2228.83	-2.0992	0.31517	-6.66052	2.72855e-11	1.0463e-09	VIT_06s0080g01090	AT3G44260.1	6.6e-117	418.7	1-to-1	NA	AT3G44260.1	Polynucleotidyl transferase%2C ribonuclease H-like superfamily protein	Encodes one of the homologs of the yeast CCR4-associated factor 1: AT3G44260 (CAF1a)%2C AT5G22250 (CAF1b). Has mRNA deadenylation activity. Also plays a role in plant defense responses.	"CAF1a"	AtCAF1a.CCR4- associated factor 1a	CCR4- associated factor 1a	Polynucleotidyl transferase%2C ribonuclease H-like superfamily protein%3B FUNCTIONS IN: ribonuclease activity%2C nucleic acid binding%3B INVOLVED IN: response to biotic stimulus%2C response to wounding%2C RNA modification%3B LOCATED IN: nucleus%3B EXPRESSED IN: 22 plant structures%3B EXPRESSED DURING: 12 growth stages%3B CONTAINS InterPro DOMAIN/s: Ribonuclease CAF1 (InterPro:IPR006941)%2C Polynu…	*****	gene:2095714.UniProt:Q9LXM2	NA	'16.8.3.1.2.2'	'RNA processing.RNA decay.deadenylation-dependent mechanism.mRNA deadenylation.CCR4-NOT complex.CAF1 deadenylase component'	'RNA processing.RNA decay.deadenylation-dependent mechanism.mRNA deadenylation.CCR4-NOT complex.CAF1 deadenylase component (original description: none)'
Vitvi14g00972	1385.01	-1.48109	0.358103	-4.13594	3.53501e-05	0.00230309	1385.01	-4.03204	0.402151	-10.0262	1.16934e-23	4.71913e-21	1385.01	-3.21183	0.357665	-8.98001	2.70744e-19	6.02973e-17	1385.01	-4.18188	0.356962	-11.7152	1.06523e-31	1.10078e-28	VIT_14s0006g01600	AT1G49000.1	1.7e-07	54.7	1-to-1	NA	AT1G49000.1	transmembrane protein	NA	NA	NA	NA	unknown protein%3B FUNCTIONS IN: molecular_function unknown%3B INVOLVED IN: biological_process unknown%3B LOCATED IN: chloroplast%3B EXPRESSED IN: stem%3B BEST Arabidopsis thaliana protein match is: unknown protein (TAIR:AT3G18560.1)%3B Has 105 Blast hits to 105 proteins in 13 species: Archae - 0%3B Bacteria - 0%3B Metazoa - 0%3B Fungi - 0%3B Plants - 105%3B Viruses - 0%3B Other Eukaryotes - 0 (s…	*****	gene:2028455.UniProt:Q9M9A2	NA	'35.2'	'not assigned.not annotated'	' no hits & (original description: none)'
Vitvi10g00469	535.021	-1.48472	0.254511	-5.83362	5.42365e-09	3.27738e-06	535.021	-2.88597	0.296299	-9.74005	2.03445e-22	6.46575e-20	535.021	-2.12113	0.259648	-8.16926	3.10274e-16	3.2732e-14	535.021	-2.16013	0.258821	-8.34603	7.05973e-17	7.51452e-15	VIT_10s0597g00050	AT5G62020.1	1.6e-18	92.8	1-to-1	NA	AT5G62020.1	heat shock transcription factor B2A	member of Heat Stress Transcription Factor (Hsf) family	"HSFB2A"	AT-HSFB2A.ARABIDOPSIS THALIANA HEAT SHOCK TRANSCRIPTION FACTOR B2A	heat shock transcription factor B2A	heat shock transcription factor B2A (HSFB2A)%3B FUNCTIONS IN: DNA binding%2C sequence-specific DNA binding transcription factor activity%3B INVOLVED IN: response to chitin%3B LOCATED IN: nucleus%3B EXPRESSED IN: 18 plant structures%3B EXPRESSED DURING: 11 growth stages%3B CONTAINS InterPro DOMAIN/s: Winged helix-turn-helix transcription repressor DNA-binding (InterPro:IPR011991)%2C Heat shock fac…	****	PMID:11118137.PMID:17722694.gene:2174042.UniProt:Q9SCW4	NA	'15.7.13'	'RNA biosynthesis.transcriptional activation.HSF (heat shock) transcription factor'	'RNA biosynthesis.transcriptional activation.HSF (heat shock) transcription factor (original description: none)'
Vitvi06g01530	4355.02	-1.48818	0.361705	-4.11435	3.8827e-05	0.0024697	4355.02	-2.82024	0.40415	-6.9782	2.98982e-12	1.6855e-10	4355.02	-3.43964	0.361651	-9.51094	1.88953e-21	6.47837e-19	4355.02	-2.40187	0.361414	-6.64574	3.01703e-11	1.14063e-09	VIT_06s0080g00910	AT2G27310.1	3.9e-79	293.5	1-to-1	NA	AT2G27310.1	F-box family protein	NA	NA	NA	NA	F-box family protein%3B BEST Arabidopsis thaliana protein match is: F-box family protein (TAIR:AT2G36090.1)%3B Has 105 Blast hits to 105 proteins in 13 species: Archae - 0%3B Bacteria - 0%3B Metazoa - 0%3B Fungi - 0%3B Plants - 105%3B Viruses - 0%3B Other Eukaryotes - 0 (source: NCBI BLink).	*****	gene:2039584.UniProt:Q9XIN8	NA	'35.1'	'not assigned.annotated'	'F-box protein At2g27310 OS=Arabidopsis thaliana (sp|q9xin8|fb119_arath : 249.0)'
Vitvi11g00261	3712.42	-1.49019	0.258971	-5.75429	8.70081e-09	4.47462e-06	3712.42	-2.10554	0.289112	-7.28281	3.26947e-13	2.22086e-11	3712.42	-1.75595	0.258949	-6.78107	1.19291e-11	4.84414e-10	3712.42	-1.40666	0.258358	-5.44464	5.19105e-08	9.81275e-07	VIT_11s0016g03080	AT5G25930.1	1.3e-79	296.6	1-to-1	NA	AT5G25930.1	kinase family with leucine-rich repeat domain-containing protein	NA	NA	NA	NA	Protein kinase family protein with leucine-rich repeat domain%3B FUNCTIONS IN: kinase activity%3B INVOLVED IN: protein amino acid phosphorylation%3B LOCATED IN: plasma membrane%2C membrane%3B EXPRESSED IN: 23 plant structures%3B EXPRESSED DURING: 14 growth stages%3B CONTAINS InterPro DOMAIN/s: Protein kinase%2C ATP binding site (InterPro:IPR017441)%2C Protein kinase%2C catalytic domain (InterPro:…	*****	PMID:17317660.PMID:17432890.gene:3442852.UniProt:Q9XGZ2	NA	'18.8.1.15'	'Protein modification.phosphorylation.TKL kinase superfamily.LRR-XV kinase'	'Protein modification.phosphorylation.TKL kinase superfamily.LRR-XV kinase (original description: none)'
Vitvi02g01780	5225.73	-1.49104	0.313878	-4.75037	2.03041e-06	0.000295645	5225.73	-2.80244	0.350876	-7.98697	1.38295e-15	1.46506e-13	5225.73	-3.05805	0.313724	-9.74758	1.88923e-22	8.20461e-20	5225.73	-2.48633	0.313868	-7.9216	2.34478e-15	1.99153e-13	VIT_02s0234g00130	AT4G17500.1	1.6e-58	224.9	1-to-1	NA	AT4G17500.1	ethylene responsive element binding factor 1	Encodes a member of the ERF (ethylene response factor) subfamily B-3 of ERF/AP2 transcription factor family (ATERF-1). The protein contains one AP2 domain. There are 18 members in this subfamily including ATERF-1%2C ATERF-2%2C AND ATERF-5.	"ERF-1"	ATERF-1.ethylene responsive element binding factor 1.AtERF	NA	NA	NA	NA	VviERF2	'15.7.7.1'	'RNA biosynthesis.transcriptional activation.AP2/ERF superfamily.ERF-type transcription factor'	'RNA biosynthesis.transcriptional activation.AP2/ERF superfamily.ERF-type transcription factor (original description: none)'
Vitvi02g00703	962.408	-1.49461	0.266603	-5.60612	2.06907e-08	8.47654e-06	962.408	-2.86455	0.298947	-9.58214	9.5053e-22	2.65574e-19	962.408	-1.95394	0.265034	-7.37242	1.67557e-13	9.92282e-12	962.408	-2.47702	0.264803	-9.35419	8.42457e-21	1.59494e-18	VIT_02s0012g01390	AT1G32690.1	4.7e-16	83.6	1-to-1	NA	AT1G32690.1	DUF740 family protein	NA	NA	NA	NA	unknown protein%3B FUNCTIONS IN: molecular_function unknown%3B INVOLVED IN: biological_process unknown%3B LOCATED IN: plasma membrane%3B EXPRESSED IN: 21 plant structures%3B EXPRESSED DURING: 11 growth stages%3B BEST Arabidopsis thaliana protein match is: unknown protein (TAIR:AT2G35200.1)%3B Has 45 Blast hits to 45 proteins in 8 species: Archae - 0%3B Bacteria - 0%3B Metazoa - 0%3B Fungi - 0%3B …	*****	PMID:17317660.gene:2035598.UniProt:Q6NNH5	NA	'35.2'	'not assigned.not annotated'	' no hits & (original description: none)'
Vitvi18g02636	10168.9	-1.49894	0.361848	-4.14246	3.43606e-05	0.00225688	10168.9	-2.80283	0.404674	-6.92616	4.32433e-12	2.36953e-10	10168.9	-3.53608	0.36185	-9.7722	1.48192e-22	6.77444e-20	10168.9	-2.51518	0.361749	-6.95283	3.58026e-12	1.63827e-10	VIT_18s0001g08810	AT1G58420.1	1.2e-17	89	1-to-1	NA	AT1G58420.1	Uncharacterized conserved protein UCP031279	NA	NA	NA	NA	Uncharacterised conserved protein UCP031279%3B CONTAINS InterPro DOMAIN/s: Uncharacterised conserved protein UCP031279 (InterPro:IPR016972)%3B BEST Arabidopsis thaliana protein match is: Uncharacterised conserved protein UCP031279 (TAIR:AT1G10140.1)%3B Has 61 Blast hits to 61 proteins in 11 species: Archae - 0%3B Bacteria - 0%3B Metazoa - 0%3B Fungi - 0%3B Plants - 61%3B Viruses - 0%3B Other Euka…	*****	gene:2037669.UniProt:Q9C647	NA	'35.2'	'not assigned.not annotated'	' no hits & (original description: none)'
Vitvi08g00298	543.034	-1.51688	0.383098	-3.95951	7.51044e-05	0.00402516	543.034	-3.3358	0.433587	-7.6935	1.4316e-14	1.23804e-12	543.034	-1.90821	0.381174	-5.00615	5.55299e-07	7.75432e-06	543.034	-3.13143	0.385665	-8.11955	4.67909e-16	4.46331e-14	VIT_08s0032g01220	AT5G04870.1	2.1e-125	448.7	1-to-1	NA	AT5G04870.1	calcium dependent protein kinase 1	A calcium-dependent protein kinase that can phosphorylate phenylalanine ammonia lyase (PAL)%2C a key enzyme in pathogen defense.	"CPK1"	ATCPK1	calcium dependent protein kinase 1	calcium dependent protein kinase 1 (CPK1)%3B FUNCTIONS IN: protein binding%2C calmodulin-dependent protein kinase activity%2C kinase activity%3B INVOLVED IN: protein amino acid phosphorylation%2C N-terminal protein myristoylation%3B LOCATED IN: peroxisome%2C membrane%3B EXPRESSED IN: 23 plant structures%3B EXPRESSED DURING: 13 growth stages%3B CONTAINS InterPro DOMAIN/s: Protein kinase%2C ATP bin…	****	PMID:11513879.PMID:12912986.PMID:16280546.gene:2175502.UniProt:Q06850	NA	'50.2.7'	'Enzyme classification.EC_2 transferases.EC_2.7 transferase transferring phosphorus-containing group'	'Calcium-dependent protein kinase 1 OS=Arabidopsis thaliana (sp|q06850|cdpk1_arath : 321.0) & Enzyme classification.EC_2 transferases.EC_2.7 transferase transferring phosphorus-containing group(50.2.7 : 203.8) (original description: none)'
Vitvi09g01122	2962.03	-1.51978	0.252582	-6.01699	1.77692e-09	1.22714e-06	2962.03	-2.5197	0.283144	-8.89898	5.63598e-19	1.09385e-16	2962.03	-2.05418	0.253004	-8.11916	4.69407e-16	4.68634e-14	2962.03	-1.62723	0.252522	-6.44393	1.16418e-10	3.82104e-09	VIT_09s0018g00240	AT1G80840.1	7.5e-24	110.2	1-to-1	NA	AT1G80840.1	WRKY DNA-binding protein 40	Pathogen-induced transcription factor. Binds W-box sequences in vitro. Forms protein complexes with itself and with WRKY40 and WRKY60. Coexpression with WRKY18 or WRKY60 made plants more susceptible to both P. syringae and B. cinerea. WRKY18%2C WRKY40%2C and WRKY60 have partially redundant roles in response to the hemibiotrophic bacterial pathogen Pseudomonas syringae and the necrotrophic fungal …	"WRKY40"	ATWRKY40	WRKY DNA-binding protein 40	WRKY DNA-binding protein 40 (WRKY40)%3B CONTAINS InterPro DOMAIN/s: DNA-binding WRKY (InterPro:IPR003657)%3B BEST Arabidopsis thaliana protein match is: WRKY DNA-binding protein 18 (TAIR:AT4G31800.2)%3B Has 3306 Blast hits to 2859 proteins in 187 species: Archae - 0%3B Bacteria - 0%3B Metazoa - 0%3B Fungi - 0%3B Plants - 3292%3B Viruses - 0%3B Other Eukaryotes - 14 (source: NCBI BLink).	****	PMID:11118137.PMID:16603654.PMID:17185563.PMID:17722694.PMID:18922600.gene:2025686.UniProt:Q9SAH7	"WRKY40"	'15.7.22'	'RNA biosynthesis.transcriptional activation.WRKY transcription factor'	'RNA biosynthesis.transcriptional activation.WRKY transcription factor (original description: none)'
Vitvi03g00630	2615.83	-1.52287	0.315911	-4.82057	1.43147e-06	0.000222783	2615.83	-3.44953	0.353864	-9.74819	1.87784e-22	6.04357e-20	2615.83	-2.24628	0.316048	-7.1074	1.18245e-12	5.76987e-11	2615.83	-2.94219	0.31611	-9.30749	1.3089e-20	2.38691e-18	VIT_03s0091g00690	AT1G27730.1	1.4e-39	161.8	1-to-1	NA	AT1G27730.1	salt tolerance zinc finger	Related to Cys2/His2-type zinc-finger proteins found in higher plants. Compensated for a subset of calcineurin deficiency in yeast. Salt tolerance produced by ZAT10 appeared to be partially dependent on ENA1/PMR2%2C a P-type ATPase required for Li+ and Na+ efflux in yeast. The protein is localized to the nucleus%2C acts as a transcriptional repressor and is responsive to chitin oligomers. Also in…	"STZ"	ZAT10	salt tolerance zinc finger	salt tolerance zinc finger (STZ)%3B CONTAINS InterPro DOMAIN/s: Zinc finger%2C C2H2-like (InterPro:IPR015880)%2C Zinc finger%2C C2H2-type (InterPro:IPR007087)%3B BEST Arabidopsis thaliana protein match is: zinc finger of Arabidopsis thaliana 6 (TAIR:AT5G04340.1)%3B Has 5350 Blast hits to 3982 proteins in 146 species: Archae - 0%3B Bacteria - 0%3B Metazoa - 4198%3B Fungi - 48%3B Plants - 937%3B Vi…	*****	PMID:11118137.PMID:15923325.PMID:17722694.gene:2199245.UniProt:Q96289	NA	'15.7.15'	'RNA biosynthesis.transcriptional activation.C2H2 zinc finger transcription factor'	'RNA biosynthesis.transcriptional activation.C2H2 zinc finger transcription factor (original description: none)'
Vitvi16g01434	478.939	-1.5316	0.357981	-4.27843	1.88217e-05	0.00149009	478.939	-2.03643	0.406831	-5.00559	5.56903e-07	1.09169e-05	478.939	-1.73911	0.356975	-4.8718	1.10588e-06	1.43363e-05	478.939	-1.86164	0.36504	-5.09983	3.39964e-07	5.27295e-06	VIT_16s0013g01110	AT5G51190.1	2.9e-38	157.5	1-to-1	NA	AT5G51190.1	Integrase-type DNA-binding superfamily protein	encodes a member of the ERF (ethylene response factor) subfamily B-3 of ERF/AP2 transcription factor family. The protein contains one AP2 domain. There are 18 members in this subfamily including ATERF-1%2C ATERF-2%2C AND ATERF-5.	NA	ERF105.ethylene response factor 105	NA	Integrase-type DNA-binding superfamily protein%3B CONTAINS InterPro DOMAIN/s: DNA-binding%2C integrase-type (InterPro:IPR016177)%2C Pathogenesis-related transcriptional factor/ERF%2C DNA-binding (InterPro:IPR001471)%3B BEST Arabidopsis thaliana protein match is: ethylene response factor 104 (TAIR:AT5G61600.1)%3B Has 30201 Blast hits to 17322 proteins in 780 species: Archae - 12%3B Bacteria - 1396…	*****	PMID:11118137.PMID:16280546.PMID:16407444.PMID:17722694.gene:2176186.UniProt:Q8VY90	VviERF6L11	'15.7.7.1'	'RNA biosynthesis.transcriptional activation.AP2/ERF superfamily.ERF-type transcription factor'	'RNA biosynthesis.transcriptional activation.AP2/ERF superfamily.ERF-type transcription factor (original description: none)'
Vitvi01g01072	6683.22	-1.53253	0.383386	-3.99736	6.40539e-05	0.00362587	6683.22	-3.47577	0.430096	-8.08137	6.40422e-16	7.30167e-14	6683.22	-1.83701	0.383491	-4.79024	1.66581e-06	2.07883e-05	6683.22	-3.27313	0.38429	-8.51734	1.63266e-17	1.92817e-15	VIT_01s0182g00140	AT1G14040.1	6.1e-91	334.3	1-to-1	NA	AT1G14040.1	EXS (ERD1/XPR1/SYG1) family protein	Encodes a PHO1 homologue that is upregulated in response to Zn deficiency and is involved in Pi homeostasis in response to Zn deficiency.	NA	PHO1%3BH3.PHO1 homolog 3	NA	EXS (ERD1/XPR1/SYG1) family protein%3B LOCATED IN: integral to membrane%3B EXPRESSED IN: 21 plant structures%3B EXPRESSED DURING: 12 growth stages%3B CONTAINS InterPro DOMAIN/s: SPX%2C N-terminal (InterPro:IPR004331)%2C EXS%2C C-terminal (InterPro:IPR004342)%3B BEST Arabidopsis thaliana protein match is: EXS (ERD1/XPR1/SYG1) family protein (TAIR:AT2G03240.1)%3B Has 1168 Blast hits to 1094 protein…	*****	gene:3434656.UniProt:Q6R8G7	PHO1	'25.3.2.2'	Nutrient uptake.phosphorus assimilation.phosphate uptake.PHO1 phosphate transporter'	'Nutrient uptake.phosphorus assimilation.phosphate uptake.PHO1 phosphate transporter (original description: none)'
Vitvi06g00915	557.29	-1.5365	0.410981	-3.73863	0.000185029	0.0080006	557.29	-2.7526	0.459035	-5.99649	2.01623e-09	6.80777e-08	557.29	-1.74573	0.409604	-4.262	2.02605e-05	0.000186284	557.29	-2.17202	0.40854	-5.31654	1.05762e-07	1.85896e-06	VIT_06s0009g00370	AT3G11840.1	1.2e-91	335.5	1-to-1	NA	AT3G11840.1	E3 ubiquitin-protein ligase PUB24-like protein	Encodes a U-box-domain-containing E3 ubiquitin ligase that acts as a negative regulator of PAMP-triggered immunity.	"PUB24"	NA	plant U-box 24	plant U-box 24 (PUB24)%3B FUNCTIONS IN: ubiquitin-protein ligase activity%2C binding%3B INVOLVED IN: respiratory burst involved in defense response%2C protein autoubiquitination%2C response to chitin%2C defense response%3B LOCATED IN: ubiquitin ligase complex%3B EXPRESSED IN: 21 plant structures%3B EXPRESSED DURING: 10 growth stages%3B CONTAINS InterPro DOMAIN/s: U box domain (InterPro:IPR003613)…	****	PMID:17722694.gene:2081505.UniProt:Q9SF15	NA	'35.1'	'not assigned.annotated'	'E3 ubiquitin-protein ligase PUB24 OS=Arabidopsis thaliana (sp|q9sf15|pub24_arath : 334.0)'
Vitvi08g02053	1434.05	-1.53845	0.37056	-4.15169	3.30024e-05	0.00221583	1434.05	-2.30686	0.413807	-5.57472	2.47929e-08	6.60753e-07	1434.05	-2.55696	0.370809	-6.89563	5.36267e-12	2.32118e-10	1434.05	-1.82672	0.369905	-4.93834	7.87892e-07	1.13213e-05	VIT_08s0105g00190	AT2G35930.1	2.3e-135	480.7	1-to-1	NA	AT2G35930.1	plant U-box 23	Encodes a cytoplasmically localized U-box domain containing E3 ubiquitin ligase that is involved in the response to water stress and acts as a negative regulator of PAMP-triggered immunity.	"PUB23"	AtPUB23	plant U-box 23	plant U-box 23 (PUB23)%3B CONTAINS InterPro DOMAIN/s: U box domain (InterPro:IPR003613)%2C Armadillo-like helical (InterPro:IPR011989)%2C Armadillo-type fold (InterPro:IPR016024)%3B BEST Arabidopsis thaliana protein match is: plant U-box 22 (TAIR:AT3G52450.1)%3B Has 2501 Blast hits to 2466 proteins in 187 species: Archae - 0%3B Bacteria - 34%3B Metazoa - 243%3B Fungi - 89%3B Plants - 1910%3B Viru…	*****	PMID:17722694.gene:2039264.UniProt:Q84TG3	NA	'35.1'	'not assigned.annotated'	'E3 ubiquitin-protein ligase PUB23 OS=Arabidopsis thaliana (sp|q84tg3|pub23_arath : 477.0)'
Vitvi16g01478	14820	-1.53866	0.362104	-4.24921	2.14523e-05	0.00160238	14820	-1.98756	0.404304	-4.91601	8.83237e-07	1.62139e-05	14820	-1.66949	0.362125	-4.61025	4.02189e-06	4.52692e-05	14820	-1.97847	0.361585	-5.47167	4.45816e-08	8.56444e-07	VIT_16s0100g01130	AT5G13930.1	2e-156	550.8	1-to-1	NA	AT5G13930.1	Chalcone and stilbene synthase family protein	Encodes chalcone synthase (CHS)%2C a key enzyme involved in the biosynthesis of flavonoids. Required for the accumulation of purple anthocyanins in leaves and stems. Also involved in the regulation of auxin transport and the modulation of root gravitropism.	"TT4"	ATCHS.CHS.CHALCONE SYNTHASE	TRANSPARENT TESTA 4	TRANSPARENT TESTA 4 (TT4)%3B FUNCTIONS IN: naringenin-chalcone synthase activity%3B INVOLVED IN: in 11 processes%3B LOCATED IN: plant-type vacuole membrane%2C endoplasmic reticulum%2C nucleus%3B EXPRESSED IN: 22 plant structures%3B EXPRESSED DURING: 14 growth stages%3B CONTAINS InterPro DOMAIN/s: Chalcone/stilbene synthase%2C N-terminal (InterPro:IPR001099)%2C Thiolase-like (InterPro:IPR016039)%2…	****	PMID:10987549.PMID:10677434.PMID:10631255.PMID:10536025.PMID:9794081.PMID:9501110.PMID:8672888.PMID:8685272.PMID:8528278.PMID:8528277.PMID:2780550.PMID:3386631.PMID:11080303.PMID:11139518.PMID:11136235.PMID:11402184.PMID:12271060.PMID:12212845.PMID:1840523.PMID:14617075.PMID:14966245.PMID:15100399.PMID:15053760.PMID:15208397.PMID:15185374.PMID:15347797.PMID:15705950.PMID:15705952.PMID:15781573.PM…	"VviSTS41"	'9.2.2.1'	'Secondary metabolism.phenolics.flavonoid synthesis and modification.chalcone synthase'	'Secondary metabolism.phenolics.flavonoid synthesis and modification.chalcone synthase (original description: none)'
Vitvi05g00524	2588.67	-1.53961	0.232612	-6.61877	3.62212e-11	6.73463e-08	2588.67	-2.8309	0.260377	-10.8723	1.56202e-27	1.28111e-24	2588.67	-1.70954	0.233592	-7.31848	2.50788e-13	1.4237e-11	2588.67	-2.51461	0.231856	-10.8456	2.09333e-27	1.03833e-24	VIT_05s0020g03690	AT2G32030.1	8.9e-58	221.9	1-to-1	NA	AT2G32030.1	Acyl-CoA N-acyltransferases (NAT) superfamily protein	NA	NA	NA	NA	Acyl-CoA N-acyltransferases (NAT) superfamily protein%3B FUNCTIONS IN: N-acetyltransferase activity%3B INVOLVED IN: metabolic process%3B LOCATED IN: cellular_component unknown%3B EXPRESSED IN: 12 plant structures%3B EXPRESSED DURING: 8 growth stages%3B CONTAINS InterPro DOMAIN/s: GCN5-related N-acetyltransferase%2C C-terminal (InterPro:IPR022610)%2C GCN5-related N-acetyltransferase (InterPro:IPR0…	*****	gene:2045476.UniProt:Q9SKZ6	NA	'35.2'	'not assigned.not annotated'	' no hits & (original description: none)'
Vitvi15g01203	2027.26	-1.53976	0.292893	-5.25707	1.46368e-07	3.88777e-05	2027.26	-3.89809	0.331429	-11.7615	6.16565e-32	1.42511e-28	2027.26	-2.90849	0.293241	-9.9184	3.46269e-23	1.96146e-20	2027.26	-3.50072	0.293466	-11.9289	8.36894e-33	1.1531e-29	VIT_15s0021g01630	AT4G17500.1	1.2e-35	148.7	1-to-1	NA	AT4G17500.1	ethylene responsive element binding factor 1	Encodes a member of the ERF (ethylene response factor) subfamily B-3 of ERF/AP2 transcription factor family (ATERF-1). The protein contains one AP2 domain. There are 18 members in this subfamily including ATERF-1%2C ATERF-2%2C AND ATERF-5.	"ERF-1"	ATERF-1.ethylene responsive element binding factor 1.AtERF	NA	NA	NA	NA	VviERF106	'15.7.7.1'	'RNA biosynthesis.transcriptional activation.AP2/ERF superfamily.ERF-type transcription factor'	'RNA biosynthesis.transcriptional activation.AP2/ERF superfamily.ERF-type transcription factor (original description: none)'
Vitvi06g00007	414.235	-1.54971	0.319115	-4.85628	1.19609e-06	0.000195342	414.235	-4.3171	0.370845	-11.6413	2.54209e-31	4.61661e-28	414.235	-3.501	0.316874	-11.0486	2.22747e-28	2.93722e-25	414.235	-3.36142	0.329678	-10.1961	2.06483e-24	6.32221e-22	VIT_06s0004g00020	AT5G08790.1	2.5e-57	221.1	1-to-1	NA	AT5G08790.1	NAC (No Apical Meristem) domain transcriptional regulator superfamily protein	induced by wounding%2C belongs to a large family of putative transcriptional activators with NAC domain.	"ATAF2"	NA	NA	ATAF2%3B CONTAINS InterPro DOMAIN/s: No apical meristem (NAM) protein (InterPro:IPR003441)%3B BEST Arabidopsis thaliana protein match is: NAC domain containing protein 102 (TAIR:AT5G63790.1)%3B Has 30201 Blast hits to 17322 proteins in 780 species: Archae - 12%3B Bacteria - 1396%3B Metazoa - 17338%3B Fungi - 3422%3B Plants - 5037%3B Viruses - 0%3B Other Eukaryotes - 2996 (source: NCBI BLink).	****	PMID:17722694.gene:504954183.UniProt:Q9C598	NA	'15.7.17'	'RNA biosynthesis.transcriptional activation.NAC transcription factor'	'RNA biosynthesis.transcriptional activation.NAC transcription factor (original description: none)'
Vitvi19g01873	2224.28	-1.55278	0.272778	-5.69248	1.2521e-08	5.93423e-06	2224.28	-1.25802	0.305533	-4.11747	3.83052e-05	0.000433234	2224.28	-1.90496	0.273618	-6.96213	3.35177e-12	1.50581e-10	2224.28	-1.46075	0.27417	-5.32792	9.93446e-08	1.75738e-06		AT4G21700.1	3.2e-178	624	1-to-1	NA	AT4G21700.1	DUF2921 family protein%2C putative (DUF2921)	NA	NA	NA	NA	Protein of unknown function (DUF2921)%3B INVOLVED IN: biological_process unknown%3B LOCATED IN: chloroplast%3B EXPRESSED IN: 12 plant structures%3B EXPRESSED DURING: LP.04 four leaves visible%2C 4 anthesis%2C LP.10 ten leaves visible%2C petal differentiation and expansion stage%2C E expanded cotyledon stage%3B CONTAINS InterPro DOMAIN/s: Protein of unknown function DUF2921 (InterPro:IPR021319)%3B…	***	PMID:15028209.gene:2119077.UniProt:Q9SVS7	NA	'35.2'	'not assigned.not annotated'	' no hits & (original description: none)'
Vitvi01g00034	1735	-1.55334	0.361867	-4.29258	1.76611e-05	0.00143251	1735	-3.26489	0.406615	-8.02943	9.79274e-16	1.06859e-13	1735	-2.25048	0.361613	-6.22346	4.8632e-10	1.41271e-08	1735	-3.23985	0.363366	-8.91621	4.82498e-19	7.34137e-17	VIT_01s0011g00380	AT1G69240.1	1.4e-69	263.1	1-to-1	NA	AT1G69240.1	methyl esterase 15	Encodes a protein predicted to act as a carboxylesterase. It has similarity to the SABP2 methyl salicylate esterase from tobacco but no enzymatic activity has been identified for this protein.	"MES15"	ATMES15.ARABIDOPSIS THALIANA METHYL ESTERASE 15.RHS9.ROOT HAIR SPECIFIC 9	methyl esterase 15	methyl esterase 15 (MES15)%3B FUNCTIONS IN: hydrolase activity%3B LOCATED IN: chloroplast%3B EXPRESSED IN: root hair%3B CONTAINS InterPro DOMAIN/s: Alpha/beta hydrolase fold-1 (InterPro:IPR000073)%3B BEST Arabidopsis thaliana protein match is: methyl esterase 13 (TAIR:AT1G26360.1)%3B Has 2747 Blast hits to 2746 proteins in 732 species: Archae - 8%3B Bacteria - 1557%3B Metazoa - 68%3B Fungi - 74%3…	***	gene:3689259.UniProt:F4I0K9	NA	'35.1'	'not assigned.annotated'	'Putative methylesterase 13. chloroplastic OS=Arabidopsis thaliana (sp|f4ie65|mes13_arath : 134.0)'
Vitvi11g01361	22.125	-1.57124	0.386226	-4.06819	4.73788e-05	0.0028919	22.125	-2.55172	0.598859	-4.26096	2.03551e-05	0.000254814	22.125	-1.61387	0.481695	-3.3504	0.00080696	0.00431322	22.125	-2.34904	0.462481	-5.0792	3.7902e-07	5.81687e-06	VIT_11s0016g01660	AT3G53260.1	5.3e-46	184.1	1-to-1	NA	AT3G53260.1	phenylalanine ammonia-lyase 2	Encodes phenylalanine lyase. Arabidopsis has four PALs: AT2G37040 (PAL1)%2C AT3G53260 (PAL2)%2C AT5G04230 (PAL3) and AT3G10340 (PAL4).	"PAL2"	ATPAL2	phenylalanine ammonia-lyase 2	phenylalanine ammonia-lyase 2 (PAL2)%3B FUNCTIONS IN: phenylalanine ammonia-lyase activity%3B INVOLVED IN: response to oxidative stress%2C response to karrikin%2C phenylpropanoid biosynthetic process%2C response to wounding%2C defense response%3B LOCATED IN: cytoplasm%3B EXPRESSED IN: 22 plant structures%3B EXPRESSED DURING: 14 growth stages%3B CONTAINS InterPro DOMAIN/s: Phenylalanine/histidine …	****	PMID:7888622.PMID:15634198.gene:2101957.UniProt:P45724	"PAL2"	'50.4.3'	'Enzyme classification.EC_4 lyases.EC_4.3 carbon-nitrogen lyase'	'Phenylalanine ammonia-lyase OS=Pinus taeda (sp|p52777|paly_pinta : 188.0) & Enzyme classification.EC_4 lyases.EC_4.3 carbon-nitrogen lyase(50.4.3 : 131.7) (original description: none)'
Vitvi01g00850	982.417	-1.57211	0.339616	-4.62909	3.67284e-06	0.00045294	982.417	-3.21211	0.380168	-8.4492	2.93309e-17	4.4655e-15	982.417	-1.54802	0.338063	-4.57907	4.6704e-06	5.15835e-05	982.417	-3.21836	0.341063	-9.43628	3.86236e-21	7.85167e-19	VIT_01s0026g00900	AT1G70170.1	1.8e-103	375.2	1-to-1	NA	AT1G70170.1	matrix metalloproteinase	mutant has Late flowering%3B Early senescence%3B Matrix Metalloproteinase	"MMP"	NA	matrix metalloproteinase	matrix metalloproteinase (MMP)%3B FUNCTIONS IN: metallopeptidase activity%2C metalloendopeptidase activity%2C zinc ion binding%3B INVOLVED IN: proteolysis%2C metabolic process%3B LOCATED IN: anchored to membrane%3B EXPRESSED IN: 7 plant structures%3B EXPRESSED DURING: L mature pollen stage%2C M germinated pollen stage%2C 4 anthesis%2C petal differentiation and expansion stage%3B CONTAINS InterPro…	*****	PMID:12805588.gene:2020547.UniProt:O04529	NA	'19.5.5.3'	'Protein degradation.peptidase families.metallopeptidase activities.Matrixin-type metalloprotease'	'Protein degradation.peptidase families.metallopeptidase activities.Matrixin-type metalloprotease (original description: none)'
Vitvi10g01388	92.6704	-1.57305	0.407015	-3.86484	0.00011116	0.00546107	92.6704	-2.66527	0.473185	-5.6326	1.7751e-08	4.89499e-07	92.6704	-1.51112	0.455081	-3.32054	0.00089843	0.00473033	92.6704	-2.41562	0.408305	-5.91622	3.29431e-09	8.14579e-08	VIT_10s0042g00940	AT1G31310.1	1.4e-51	202.6	1-to-1	NA	AT1G31310.1	hydroxyproline-rich glycoprotein family protein	NA	NA	NA	NA	hydroxyproline-rich glycoprotein family protein%3B CONTAINS InterPro DOMAIN/s: MYB-like (InterPro:IPR017877)%3B BEST Arabidopsis thaliana protein match is: Homeodomain-like superfamily protein (TAIR:AT2G35640.1)%3B Has 3054 Blast hits to 2678 proteins in 309 species: Archae - 8%3B Bacteria - 384%3B Metazoa - 1064%3B Fungi - 253%3B Plants - 884%3B Viruses - 120%3B Other Eukaryotes - 341 (source: N…	****	PMID:11118137.gene:2197489.UniProt:F4I9C1	NA	'35.2'	'not assigned.not annotated'	' no hits & (original description: none)'
Vitvi03g00645	2902.27	-1.57759	0.375253	-4.20408	2.62149e-05	0.00186365	2902.27	-3.47744	0.421081	-8.25837	1.47681e-16	1.8588e-14	2902.27	-3.04787	0.375204	-8.12324	4.53895e-16	4.5489e-14	2902.27	-2.96032	0.37518	-7.89039	3.01241e-15	2.48208e-13	VIT_03s0091g00810	AT3G19615.1	2.4e-09	60.5	1-to-1	NA	AT3G19615.1	beta-1%2C4-xylosidase	NA	NA	NA	NA	unknown protein%3B FUNCTIONS IN: molecular_function unknown%3B INVOLVED IN: biological_process unknown%3B LOCATED IN: cellular_component unknown%3B Has 10 Blast hits to 10 proteins in 5 species: Archae - 0%3B Bacteria - 0%3B Metazoa - 0%3B Fungi - 0%3B Plants - 10%3B Viruses - 0%3B Other Eukaryotes - 0 (source: NCBI BLink).	*****	gene:4010712601.UniProt:A8MR54	NA	'35.2'	'not assigned.not annotated'	' no hits & (original description: none)'
Vitvi03g01288	2172.78	-1.57817	0.314511	-5.01784	5.22559e-07	0.000105257	2172.78	-1.59855	0.35089	-4.55572	5.22069e-06	7.69484e-05	2172.78	-2.79681	0.315105	-8.87582	6.94202e-19	1.38083e-16	2172.78	-1.79302	0.313372	-5.72169	1.05469e-08	2.31685e-07	VIT_03s0017g02170	AT1G05300.1	4.2e-60	230.7	1-to-1	NA	AT1G05300.1	zinc transporter 5 precursor	member of Fe(II) transporter isolog family	"ZIP5"	NA	zinc transporter 5 precursor	zinc transporter 5 precursor (ZIP5)%3B FUNCTIONS IN: cation transmembrane transporter activity%2C metal ion transmembrane transporter activity%3B INVOLVED IN: response to zinc ion%2C cation transport%3B LOCATED IN: endomembrane system%2C integral to membrane%2C membrane%3B EXPRESSED IN: 10 plant structures%3B EXPRESSED DURING: LP.06 six leaves visible%2C LP.04 four leaves visible%2C 4 anthesis%2C…	****	PMID:11500563.PMID:18436742.gene:2207139.UniProt:O23039	NA	'24.2.11.1'	'Solute transport.carrier-mediated transport.ZIP family.metal cation transporter (ZIP-type)'	'Solute transport.carrier-mediated transport.ZIP family.metal cation transporter (ZIP-type) (original description: none)'
Vitvi17g00292	1573.06	-1.59007	0.347372	-4.57743	4.70734e-06	0.000553449	1573.06	-2.91515	0.391992	-7.43676	1.03184e-13	7.64852e-12	1573.06	-1.87821	0.348472	-5.38986	7.05126e-08	1.22002e-06	1573.06	-2.84009	0.349924	-8.11632	4.80543e-16	4.56627e-14	VIT_17s0000g03380	AT1G73805.1	1.3e-44	180.3	1-to-many	AT4G25800.1.AT4G25800.2.AT5G57580.1	AT1G73805.1	Calmodulin binding protein-like protein	Encodes SAR Deficient 1 (SARD1)%2C a key regulator for ICS1 (Isochorismate Synthase 1) induction and salicylic acid (SA) synthesis.	"SARD1"	NA	SAR Deficient 1	Calmodulin binding protein-like%3B CONTAINS InterPro DOMAIN/s: Calmodulin binding protein-like (InterPro:IPR012416)%3B BEST Arabidopsis thaliana protein match is: Calmodulin-binding protein (TAIR:AT5G57580.1)%3B Has 30201 Blast hits to 17322 proteins in 780 species: Archae - 12%3B Bacteria - 1396%3B Metazoa - 17338%3B Fungi - 3422%3B Plants - 5037%3B Viruses - 0%3B Other Eukaryotes - 2996 (source…	****	gene:3689797.UniProt:Q9C9T2	NA	'35.1'	'not assigned.annotated'	'Protein SAR DEFICIENT 1 OS=Arabidopsis thaliana (sp|q9c9t2|sard1_arath : 177.0)'
Vitvi01g00732	1711.33	-1.59589	0.308781	-5.16835	2.36165e-07	5.4888e-05	1711.33	-3.73699	0.346416	-10.7876	3.93969e-27	2.94608e-24	1711.33	-2.45972	0.308382	-7.97623	1.50868e-15	1.35092e-13	1711.33	-2.93373	0.308424	-9.512	1.87024e-21	3.96443e-19	VIT_01s0127g00700	AT1G23710.1	1.5e-42	172.2	1-to-1	NA	AT1G23710.1	hypothetical protein (DUF1645)	NA	NA	NA	NA	Protein of unknown function (DUF1645)%3B CONTAINS InterPro DOMAIN/s: Protein of unknown function DUF1645 (InterPro:IPR012442)%3B BEST Arabidopsis thaliana protein match is: Protein of unknown function (DUF1645) (TAIR:AT1G70420.1)%3B Has 288 Blast hits to 282 proteins in 52 species: Archae - 0%3B Bacteria - 6%3B Metazoa - 16%3B Fungi - 11%3B Plants - 191%3B Viruses - 0%3B Other Eukaryotes - 64 (so…	*****	gene:2034892.UniProt:Q9ZUC4	NA	'35.2'	'not assigned.not annotated'	' no hits & (original description: none)'
Vitvi01g01924	733.62	-1.6014	0.37263	-4.29756	1.72689e-05	0.00141975	733.62	-3.68533	0.418173	-8.81293	1.21915e-18	2.22999e-16	733.62	-1.82824	0.37116	-4.92573	8.40444e-07	1.12748e-05	733.62	-3.02299	0.369431	-8.18283	2.77247e-16	2.7504e-14	VIT_01s0011g02790	AT1G68765.1	1.2e-06	51.6	1-to-1	NA	AT1G68765.1	Putative membrane lipoprotein	Encodes a small protein of 77 amino acids. Loss of function mutations are defective in the process of ethylene independent floral organ abscission. Although the mutants have a normal appearing abscission zone%2C the floral organs do not abscisce. The peptide appears to be secreted and may function as a ligand. Arabidopsis 35S:IDA lines constitutively overexpressing IDA exhibit earlier abscission …	"IDA"	NA	INFLORESCENCE DEFICIENT IN ABSCISSION	INFLORESCENCE DEFICIENT IN ABSCISSION (IDA)%3B Has 26 Blast hits to 26 proteins in 8 species: Archae - 0%3B Bacteria - 0%3B Metazoa - 0%3B Fungi - 0%3B Plants - 26%3B Viruses - 0%3B Other Eukaryotes - 0 (source: NCBI BLink).	*****	gene:3686876.UniProt:Q8LAD7	"IDA"	'11.10.1.5.1'	'Phytohormones.signalling peptides.NCRP (non-cysteine-rich-peptide) category.IDL family.IDA/IDL precursor polypeptide'	'Phytohormones.signalling peptides.NCRP (non-cysteine-rich-peptide) category.IDL family.IDA/IDL precursor polypeptide (original description: none)'
Vitvi05g01758	14900.9	-1.60205	0.407675	-3.92974	8.50392e-05	0.00445875	14900.9	-3.33048	0.455335	-7.31436	2.58617e-13	1.79654e-11	14900.9	-2.45679	0.407825	-6.02413	1.70017e-09	4.33477e-08	14900.9	-2.6281	0.407165	-6.45462	1.08492e-10	3.59721e-09	VIT_05s0077g01560	AT1G24020.1	3.4e-11	67.4	1-to-many	AT1G24020.2	AT1G24020.1	MLP-like protein 423	NA	"MLP423"	NA	MLP-like protein 423	MLP-like protein 423 (MLP423)%3B INVOLVED IN: response to biotic stimulus%2C defense response%3B LOCATED IN: membrane%3B EXPRESSED IN: 23 plant structures%3B EXPRESSED DURING: 15 growth stages%3B CONTAINS InterPro DOMAIN/s: Bet v I allergen (InterPro:IPR000916)%3B BEST Arabidopsis thaliana protein match is: MLP-like protein 28 (TAIR:AT1G70830.3)%3B Has 1440 Blast hits to 1404 proteins in 125 spec…	****	PMID:9332353.PMID:17432890.gene:2199931.UniProt:Q93VR4	NA	'35.1'	'not assigned.annotated'	'Major allergen Pru av 1 OS=Prunus avium (sp|o24248|pru1_pruav : 193.0)'
Vitvi09g01398	743.232	-1.60315	0.345671	-4.6378	3.52129e-06	0.000437311	743.232	-3.77575	0.381958	-9.88525	4.82353e-23	1.70331e-20	743.232	-1.54068	0.355133	-4.33833	1.43571e-05	0.000138096	743.232	-3.68281	0.340713	-10.8091	3.11625e-27	1.48627e-24	VIT_09s0054g00900	AT3G50940.1	4.8e-107	388.3	1-to-1	NA	AT3G50940.1	P-loop containing nucleoside triphosphate hydrolases superfamily protein	NA	NA	NA	NA	P-loop containing nucleoside triphosphate hydrolases superfamily protein%3B FUNCTIONS IN: nucleoside-triphosphatase activity%2C ATPase activity%2C nucleotide binding%2C ATP binding%3B LOCATED IN: endomembrane system%3B CONTAINS InterPro DOMAIN/s: ATPase%2C AAA-type%2C core (InterPro:IPR003959)%2C ATPase%2C AAA+ type%2C core (InterPro:IPR003593)%2C ATPase%2C AAA-type%2C conserved site (InterPro:IP…	****	gene:2078006.UniProt:Q147F9	NA	'35.1'	'not assigned.annotated'	'Protein HYPER-SENSITIVITY-RELATED 4 OS=Arabidopsis thaliana (sp|q8vzg2|hsr4_arath : 288.0)'
Vitvi04g01160	2268.09	-1.60571	0.368281	-4.36002	1.30051e-05	0.00117733	2268.09	-3.82133	0.41303	-9.25195	2.20427e-20	5.44112e-18	2268.09	-3.97086	0.368806	-10.7668	4.93795e-27	5.36117e-24	2268.09	-3.68134	0.368474	-9.99076	1.67293e-23	4.55938e-21	VIT_04s0023g00430	AT5G16480.1	1.2e-25	117.1	1-to-1	NA	AT5G16480.1	Phosphotyrosine protein phosphatases superfamily protein	Encodes an atypical dual-speci%26	NA	NA	NA	NA	NA	NA	NA	'35.1'	'not assigned.annotated'	'Tyrosine-protein phosphatase DSP5 OS=Arabidopsis thaliana (sp|q9ffd7|dsp5_arath : 115.0)'
Vitvi01g00379	1736.94	-1.60721	0.306518	-5.24345	1.57605e-07	4.14073e-05	1736.94	-3.31513	0.345184	-9.60395	7.69387e-22	2.17352e-19	1736.94	-2.29294	0.305921	-7.49519	6.62003e-14	4.18685e-12	1736.94	-2.71205	0.307173	-8.82906	1.05558e-18	1.45441e-16	VIT_01s0011g04550	AT3G03280.1	3.6e-29	127.1	1-to-1	NA	AT3G03280.1	hypothetical protein	NA	NA	NA	NA	unknown protein%3B FUNCTIONS IN: molecular_function unknown%3B INVOLVED IN: N-terminal protein myristoylation%3B LOCATED IN: cellular_component unknown%3B BEST Arabidopsis thaliana protein match is: unknown protein (TAIR:AT5G17350.1)%3B Has 137 Blast hits to 137 proteins in 11 species: Archae - 0%3B Bacteria - 0%3B Metazoa - 0%3B Fungi - 0%3B Plants - 137%3B Viruses - 0%3B Other Eukaryotes - 0 (s…	*****	PMID:12912986.gene:2097739.UniProt:Q9M9P6	NA	'35.2'	'not assigned.not annotated'	' no hits & (original description: none)'
Vitvi18g02637	534.388	-1.61478	0.354145	-4.55966	5.12375e-06	0.000592566	534.388	-2.12428	0.394452	-5.38538	7.22907e-08	1.74052e-06	534.388	-2.56966	0.359959	-7.13875	9.41852e-13	4.68356e-11	534.388	-2.09596	0.350944	-5.97236	2.33851e-09	5.96682e-08	VIT_18s0001g08820	AT1G58420.1	2.3e-11	68.2	1-to-1	NA	AT1G58420.1	Uncharacterized conserved protein UCP031279	NA	NA	NA	NA	Uncharacterised conserved protein UCP031279%3B CONTAINS InterPro DOMAIN/s: Uncharacterised conserved protein UCP031279 (InterPro:IPR016972)%3B BEST Arabidopsis thaliana protein match is: Uncharacterised conserved protein UCP031279 (TAIR:AT1G10140.1)%3B Has 61 Blast hits to 61 proteins in 11 species: Archae - 0%3B Bacteria - 0%3B Metazoa - 0%3B Fungi - 0%3B Plants - 61%3B Viruses - 0%3B Other Euka…	*****	gene:2037669.UniProt:Q9C647	NA	'35.2'	'not assigned.not annotated'	' no hits & (original description: none)'
Vitvi16g01483	15185.8	-1.61655	0.37833	-4.27285	1.92987e-05	0.00151223	15185.8	-2.02337	0.423096	-4.78229	1.73313e-06	2.93962e-05	15185.8	-1.22311	0.378313	-3.23306	0.0012247	0.00613105	15185.8	-1.93488	0.378351	-5.11399	3.15416e-07	4.92919e-06	VIT_16s0100g01190	AT5G13930.1	5e-147	519.6	1-to-1	NA	AT5G13930.1	Chalcone and stilbene synthase family protein	Encodes chalcone synthase (CHS)%2C a key enzyme involved in the biosynthesis of flavonoids. Required for the accumulation of purple anthocyanins in leaves and stems. Also involved in the regulation of auxin transport and the modulation of root gravitropism.	"TT4"	ATCHS.CHS.CHALCONE SYNTHASE	TRANSPARENT TESTA 4	TRANSPARENT TESTA 4 (TT4)%3B FUNCTIONS IN: naringenin-chalcone synthase activity%3B INVOLVED IN: in 11 processes%3B LOCATED IN: plant-type vacuole membrane%2C endoplasmic reticulum%2C nucleus%3B EXPRESSED IN: 22 plant structures%3B EXPRESSED DURING: 14 growth stages%3B CONTAINS InterPro DOMAIN/s: Chalcone/stilbene synthase%2C N-terminal (InterPro:IPR001099)%2C Thiolase-like (InterPro:IPR016039)%2…	****	PMID:10987549.PMID:10677434.PMID:10631255.PMID:10536025.PMID:9794081.PMID:9501110.PMID:8672888.PMID:8685272.PMID:8528278.PMID:8528277.PMID:2780550.PMID:3386631.PMID:11080303.PMID:11139518.PMID:11136235.PMID:11402184.PMID:12271060.PMID:12212845.PMID:1840523.PMID:14617075.PMID:14966245.PMID:15100399.PMID:15053760.PMID:15208397.PMID:15185374.PMID:15347797.PMID:15705950.PMID:15705952.PMID:15781573.PM…	"VviSTS47"	'9.2.2.1'	'Secondary metabolism.phenolics.flavonoid synthesis and modification.chalcone synthase'	'Secondary metabolism.phenolics.flavonoid synthesis and modification.chalcone synthase (original description: none)'
Vitvi05g01118	2901.02	-1.61961	0.405762	-3.99153	6.56485e-05	0.00369478	2901.02	-1.91858	0.454423	-4.22201	2.42133e-05	0.00029498	2901.02	-3.43212	0.40534	-8.46727	2.51207e-17	3.32269e-15	2901.02	-1.54729	0.406083	-3.81028	0.000138807	0.00105438	VIT_05s0029g00500	AT4G13830.3	1.8e-32	139	1-to-1	NA	AT4G13830.3	DNAJ-like 20	NA	"J20"	DJC26.DNA J protein C26	DNAJ-like 20	NA	NA	NA	NA	'35.1'	'not assigned.annotated'	'Chaperone protein dnaJ 20. chloroplastic OS=Arabidopsis thaliana (sp|q9sdn0|dnj20_arath : 135.0)'
Vitvi05g01752	1231.12	-1.62266	0.321317	-5.05003	4.41738e-07	9.20452e-05	1231.12	-1.26747	0.359207	-3.52851	0.000417914	0.00335611	1231.12	-2.49881	0.323839	-7.71621	1.19844e-14	9.02536e-13	1231.12	-1.37435	0.320418	-4.28926	1.79273e-05	0.000181402	VIT_05s0077g01650	AT1G24020.1	6.5e-06	49.3	1-to-many	AT1G24020.2	AT1G24020.1	MLP-like protein 423	NA	"MLP423"	NA	MLP-like protein 423	MLP-like protein 423 (MLP423)%3B INVOLVED IN: response to biotic stimulus%2C defense response%3B LOCATED IN: membrane%3B EXPRESSED IN: 23 plant structures%3B EXPRESSED DURING: 15 growth stages%3B CONTAINS InterPro DOMAIN/s: Bet v I allergen (InterPro:IPR000916)%3B BEST Arabidopsis thaliana protein match is: MLP-like protein 28 (TAIR:AT1G70830.3)%3B Has 1440 Blast hits to 1404 proteins in 125 spec…	****	PMID:9332353.PMID:17432890.gene:2199931.UniProt:Q93VR4	NA	'35.1'	'not assigned.annotated'	'Major allergen Pru ar 1 OS=Prunus armeniaca (sp|o50001|pru1_pruar : 156.0)'
Vitvi04g01848	3476.7	-1.63203	0.325076	-5.02046	5.15474e-07	0.000104702	3476.7	-3.63945	0.363732	-10.0059	1.43623e-23	5.61786e-21	3476.7	-2.09014	0.326442	-6.4028	1.52556e-10	4.9076e-09	3476.7	-3.63896	0.324687	-11.2076	3.7431e-29	2.50899e-26	VIT_04s0008g03530	AT2G24600.3	7.9e-38	157.5	1-to-many	AT2G24600.4	AT2G24600.3	Ankyrin repeat family protein	NA	NA	NA	NA	Ankyrin repeat family protein%3B CONTAINS InterPro DOMAIN/s: Ankyrin repeat-containing domain (InterPro:IPR020683)%2C Ankyrin repeat (InterPro:IPR002110)%3B BEST Arabidopsis thaliana protein match is: Ankyrin repeat family protein (TAIR:AT1G10340.1)%3B Has 35333 Blast hits to 34131 proteins in 2444 species: Archae - 798%3B Bacteria - 22429%3B Metazoa - 974%3B Fungi - 991%3B Plants - 531%3B Viruse…	****	gene:1006228120.UniProt:F4IPR3	NA	'35.1'	'not assigned.annotated'	'Ankyrin repeat-containing protein BDA1 OS=Arabidopsis thaliana (sp|q8gyh5|bad1_arath : 95.1)'
Vitvi11g00394	1267.97	-1.63252	0.401664	-4.0644	4.81556e-05	0.00292455	1267.97	-3.55349	0.452564	-7.8519	4.09773e-15	3.80236e-13	1267.97	-2.9613	0.402399	-7.3591	1.8515e-13	1.082e-11	1267.97	-3.1064	0.402599	-7.71586	1.20171e-14	8.63872e-13	VIT_11s0016g04490	AT1G04250.1	2.5e-19	96.3	1-to-1	NA	AT1G04250.1	AUX/IAA transcriptional regulator family protein	Transcription regulator acting as repressor of auxin-inducible gene expression. Auxin-inducible AUX/IAA gene. Short-lived nuclear protein with four conserved domains. Domain III has homology to beta alpha alpha dimerization and DNA binding domains. Involved in auxin signaling and is a positive modulator of natural leaf senescence. Auxin induces the degradation of the protein in a dosage-dependent…	"AXR3"	AtIAA17.IAA17.indole-3-acetic acid inducible 17	AUXIN RESISTANT 3	AUXIN RESISTANT 3 (AXR3)%3B CONTAINS InterPro DOMAIN/s: Aux/IAA-ARF-dimerisation (InterPro:IPR011525)%2C AUX/IAA protein (InterPro:IPR003311)%3B BEST Arabidopsis thaliana protein match is: indole-3-acetic acid inducible 14 (TAIR:AT4G14550.1)%3B Has 1763 Blast hits to 1762 proteins in 78 species: Archae - 0%3B Bacteria - 0%3B Metazoa - 0%3B Fungi - 0%3B Plants - 1762%3B Viruses - 0%3B Other Eukary…	****	PMID:11118137.gene:2018373.UniProt:P93830	NA	'35.1'	'not assigned.annotated'	'Auxin-responsive protein IAA17 OS=Arabidopsis thaliana (sp|p93830|iaa17_arath : 95.1)'
Vitvi04g00217	226.706	-1.63435	0.357078	-4.577	4.71683e-06	0.000553449	226.706	-1.47071	0.395465	-3.71894	0.000200062	0.00182576	226.706	-1.62547	0.37067	-4.38521	1.15872e-05	0.00011472	226.706	-1.41305	0.35215	-4.01265	6.00409e-05	0.000517219	VIT_04s0008g02520	AT5G38280.1	6e-71	266.9	1-to-many	AT5G38280.2	AT5G38280.1	PR5-like receptor kinase	putative receptor serine/threonine kinase PR5K (PR5K) mRNA%2C PR5-like receptor kinase	"PR5K"	NA	PR5-like receptor kinase	PR5-like receptor kinase (PR5K)%3B FUNCTIONS IN: transmembrane receptor protein serine/threonine kinase activity%2C kinase activity%3B INVOLVED IN: response to fungus%3B LOCATED IN: endomembrane system%3B EXPRESSED IN: 6 plant structures%3B EXPRESSED DURING: petal differentiation and expansion stage%3B CONTAINS InterPro DOMAIN/s: Protein kinase%2C ATP binding site (InterPro:IPR017441)%2C Protein …	*****	PMID:8637920.gene:2176736.UniProt:Q9FF29	NA	'18.8.1.45'	'Protein modification.phosphorylation.TKL kinase superfamily.RLCK-Os kinase'	'Protein modification.phosphorylation.TKL kinase superfamily.RLCK-Os kinase (original description: none)'
Vitvi05g01573	920.817	-1.63521	0.287216	-5.69331	1.24602e-08	5.93423e-06	920.817	-1.06072	0.324446	-3.26933	0.00107802	0.00740176	920.817	-1.49569	0.286999	-5.21148	1.87337e-07	2.92827e-06	920.817	-1.47392	0.289347	-5.09395	3.50682e-07	5.42658e-06	VIT_05s0094g00200	AT3G54420.1	4.4e-53	208	1-to-1	NA	AT3G54420.1	homolog of carrot EP3-3 chitinase	encodes an EP3 chitinase that is expressed during somatic embryogenesis in 'nursing' cells surrounding the embryos but not in embryos themselves. The gene is also expressed in mature pollen and growing pollen tubes until they enter the receptive synergid%2C but not in endosperm and integuments as in carrot. Post-embryonically%2C expression is found in hydathodes%2C stipules%2C root epidermis and …	"EP3"	ATCHITIV.CHITINASE CLASS IV.ATEP3.homolog of carrot EP3-3 chitinase.CHIV	homolog of carrot EP3-3 chitinase	homolog of carrot EP3-3 chitinase (EP3)%3B FUNCTIONS IN: chitinase activity%3B INVOLVED IN: somatic embryogenesis%2C plant-type hypersensitive response%3B LOCATED IN: cell wall%3B EXPRESSED IN: 18 plant structures%3B EXPRESSED DURING: 6 growth stages%3B CONTAINS InterPro DOMAIN/s: Chitin-binding%2C type 1%2C conserved site (InterPro:IPR018371)%2C Glycoside hydrolase%2C family 19 (InterPro:IPR0162…	*****	PMID:14595688.gene:3701783.UniProt:Q9M2U5	NA	'35.1'	'not assigned.annotated'	'Endochitinase EP3 OS=Arabidopsis thaliana (sp|q9m2u5|chi5_arath : 205.0)'
Vitvi07g02156	119.658	-1.63572	0.400713	-4.08202	4.46467e-05	0.00276706	119.658	-4.74159	0.569782	-8.32177	8.66624e-17	1.1739e-14	119.658	-3.61486	0.411707	-8.78017	1.63227e-18	2.97878e-16	119.658	-4.83313	0.469043	-10.3042	6.74218e-25	2.17159e-22	VIT_07s0104g01130	AT3G62990.1	1.6e-05	48.5	1-to-1	NA	AT3G62990.1	myelin transcription factor-like protein	NA	NA	NA	NA	unknown protein%3B FUNCTIONS IN: molecular_function unknown%3B INVOLVED IN: biological_process unknown%3B LOCATED IN: endomembrane system%3B BEST Arabidopsis thaliana protein match is: unknown protein (TAIR:AT2G47950.1)%3B Has 22 Blast hits to 22 proteins in 5 species: Archae - 0%3B Bacteria - 0%3B Metazoa - 0%3B Fungi - 0%3B Plants - 22%3B Viruses - 0%3B Other Eukaryotes - 0 (source: NCBI BLink).	*****	gene:2099246.UniProt:A0JPZ2	NA	'35.2'	'not assigned.not annotated'	' no hits & (original description: none)'
Vitvi05g01893	2541.16	-1.64479	0.20403	-8.06152	7.53502e-16	9.10644e-12	2541.16	-2.9369	0.229623	-12.7901	1.86181e-37	9.46733e-34	2541.16	-1.51147	0.204282	-7.39891	1.37307e-13	8.26283e-12	2541.16	-2.58858	0.203725	-12.7062	5.45965e-37	1.5045e-33	VIT_05s0020g03710	AT2G32030.1	9.1e-57	218.4	1-to-1	NA	AT2G32030.1	Acyl-CoA N-acyltransferases (NAT) superfamily protein	NA	NA	NA	NA	Acyl-CoA N-acyltransferases (NAT) superfamily protein%3B FUNCTIONS IN: N-acetyltransferase activity%3B INVOLVED IN: metabolic process%3B LOCATED IN: cellular_component unknown%3B EXPRESSED IN: 12 plant structures%3B EXPRESSED DURING: 8 growth stages%3B CONTAINS InterPro DOMAIN/s: GCN5-related N-acetyltransferase%2C C-terminal (InterPro:IPR022610)%2C GCN5-related N-acetyltransferase (InterPro:IPR0…	*****	gene:2045476.UniProt:Q9SKZ6	NA	'35.2'	'not assigned.not annotated'	' no hits & (original description: none)'
Vitvi18g02585	262.974	-1.64738	0.36376	-4.52875	5.93324e-06	0.000676445	262.974	-3.1903	0.420359	-7.58946	3.21249e-14	2.65187e-12	262.974	-1.49073	0.366544	-4.06699	4.76251e-05	0.000389873	262.974	-2.75212	0.370609	-7.42593	1.11994e-13	6.75808e-12	VIT_18s0001g06400	AT1G35210.1	1.5e-07	55.1	1-to-1	NA	AT1G35210.1	hypothetical protein	NA	NA	NA	NA	unknown protein%3B FUNCTIONS IN: molecular_function unknown%3B INVOLVED IN: biological_process unknown%3B LOCATED IN: chloroplast%3B EXPRESSED IN: 14 plant structures%3B EXPRESSED DURING: 9 growth stages%3B CONTAINS InterPro DOMAIN/s: Protein of unknown function DUF740 (InterPro:IPR008004)%3B BEST Arabidopsis thaliana protein match is: unknown protein (TAIR:AT1G22470.1)%3B Has 83 Blast hits to 83…	*****	gene:2203303.UniProt:Q9C6F2	NA	'35.2'	'not assigned.not annotated'	' no hits & (original description: none)'
Vitvi13g00050	1492.3	-1.64929	0.268718	-6.13763	8.37595e-10	6.7485e-07	1492.3	-2.03292	0.300911	-6.75586	1.41987e-11	7.17697e-10	1492.3	-1.79722	0.269348	-6.67248	2.51509e-11	9.4842e-10	1492.3	-1.8601	0.268945	-6.9163	4.63606e-12	2.05687e-10	VIT_13s0067g00930	AT3G55950.1	6.1e-202	702.6	1-to-1	NA	AT3G55950.1	CRINKLY4 related 3	NA	"CCR3"	ATCRR3	CRINKLY4 related 3	CRINKLY4 related 3 (CCR3)%3B FUNCTIONS IN: kinase activity%3B INVOLVED IN: protein amino acid phosphorylation%3B LOCATED IN: endomembrane system%3B EXPRESSED IN: 23 plant structures%3B EXPRESSED DURING: 10 growth stages%3B CONTAINS InterPro DOMAIN/s: Protein kinase%2C ATP binding site (InterPro:IPR017441)%2C Regulator of chromosome condensation/beta-lactamase-inhibitor protein II (InterPro:IPR009…	***	gene:2082032.UniProt:Q9LY50	NA	'18.8.1.26'	'Protein modification.phosphorylation.TKL kinase superfamily.Crinkly-like kinase'	'Protein modification.phosphorylation.TKL kinase superfamily.Crinkly-like kinase (original description: none)'
Vitvi01g00188	12568.4	-1.65132	0.259983	-6.35165	2.13019e-10	2.45184e-07	12568.4	-2.56866	0.29078	-8.83368	1.01287e-18	1.89354e-16	12568.4	-2.26829	0.259838	-8.72962	2.55522e-18	4.46855e-16	12568.4	-2.11435	0.259909	-8.13495	4.12101e-16	3.96144e-14	VIT_01s0011g02320	AT1G13500.1	4.5e-63	240.4	1-to-1	NA	AT1G13500.1	hypothetical protein (DUF1262)	NA	NA	NA	NA	Protein of unknown function (DUF1262)%3B CONTAINS InterPro DOMAIN/s: Protein of unknown function DUF1262 (InterPro:IPR010683)%3B BEST Arabidopsis thaliana protein match is: Protein of unknown function (DUF1262) (TAIR:AT1G13530.1)%3B Has 101 Blast hits to 94 proteins in 9 species: Archae - 0%3B Bacteria - 0%3B Metazoa - 0%3B Fungi - 0%3B Plants - 101%3B Viruses - 0%3B Other Eukaryotes - 0 (source:…	*	gene:2009971.UniProt:F4HQU2	NA	'35.2'	'not assigned.not annotated'	' no hits & (original description: none)'
Vitvi11g01265	3158.5	-1.66303	0.367529	-4.5249	6.04254e-06	0.000682496	3158.5	-3.4484	0.413022	-8.3492	6.87285e-17	9.73702e-15	3158.5	-3.26346	0.367102	-8.88979	6.12246e-19	1.23669e-16	3158.5	-3.03758	0.367756	-8.25979	1.45935e-16	1.51437e-14	VIT_11s0052g01220	AT5G57560.1	2.5e-54	211.1	1-to-1	NA	AT5G57560.1	Xyloglucan endotransglucosylase/hydrolase family protein	Encodes a cell wall-modifying enzyme%2C rapidly upregulated in response to environmental stimuli	"TCH4"	XTH22.xyloglucan endotransglucosylase/hydrolase 22	Touch 4	Touch 4 (TCH4)%3B CONTAINS InterPro DOMAIN/s: Xyloglucan endotransglucosylase/hydrolase (InterPro:IPR016455)%2C Xyloglucan endo-transglycosylase%2C C-terminal (InterPro:IPR010713)%2C Concanavalin A-like lectin/glucanase%2C subgroup (InterPro:IPR013320)%2C Concanavalin A-like lectin/glucanase (InterPro:IPR008985)%2C Glycoside hydrolase%2C family 16 (InterPro:IPR000757)%2C Glycoside hydrolase%2C fa…	****	PMID:16214899.PMID:18334669.gene:2174496.UniProt:Q38857	NA	'35.1'	'not assigned.annotated'	'Probable xyloglucan endotransglucosylase/hydrolase protein 23 OS=Arabidopsis thaliana (sp|q38910|xth23_arath : 194.0)'
Vitvi10g02422	902.993	-1.66464	0.352278	-4.72536	2.29713e-06	0.000315477	902.993	-4.69487	0.405296	-11.5838	4.97841e-31	8.43841e-28	902.993	-3.11814	0.359331	-8.67763	4.0409e-18	6.58086e-16	902.993	-3.95103	0.356565	-11.0808	1.55432e-28	9.40214e-26	VIT_00s2659g00010	AT4G23180.1	1e-87	322.8	1-to-1	NA	AT4G23180.1	cysteine-rich RLK (RECEPTOR-like protein kinase) 10	Encodes a receptor-like protein kinase. Naming convention from Chen et al 2003 (PMID 14756307)	"CRK10"	RLK4	cysteine-rich RLK (RECEPTOR-like protein kinase) 10	cysteine-rich RLK (RECEPTOR-like protein kinase) 10 (CRK10)%3B FUNCTIONS IN: protein serine/threonine kinase activity%2C protein kinase activity%2C kinase activity%2C ATP binding%3B INVOLVED IN: protein amino acid phosphorylation%3B LOCATED IN: plasma membrane%3B EXPRESSED IN: 22 plant structures%3B EXPRESSED DURING: 13 growth stages%3B CONTAINS InterPro DOMAIN/s: Protein kinase%2C ATP binding si…	****	PMID:17317660.gene:2121675.UniProt:Q8GYA4	NA	'50.2.7'	'Enzyme classification.EC_2 transferases.EC_2.7 transferase transferring phosphorus-containing group'	'Cysteine-rich receptor-like protein kinase 29 OS=Arabidopsis thaliana (sp|q8s9l6|crk29_arath : 280.0) & Enzyme classification.EC_2 transferases.EC_2.7 transferase transferring phosphorus-containing group(50.2.7 : 92.2) (original description: none)'
Vitvi08g00801	1062.77	-1.66722	0.287083	-5.80746	6.3426e-09	3.49627e-06	1062.77	-2.79554	0.324773	-8.60767	7.45598e-18	1.21518e-15	1062.77	-2.34439	0.287523	-8.15376	3.52779e-16	3.61904e-14	1062.77	-2.20248	0.288171	-7.64297	2.12274e-14	1.48299e-12	VIT_08s0058g00790	AT3G51680.1	1e-112	405.2	1-to-1	NA	AT3G51680.1	NAD(P)-binding Rossmann-fold superfamily protein	NA	"SDR2"	AtSDR2	short-chain dehydrogenase/reductase 2	NAD(P)-binding Rossmann-fold superfamily protein%3B FUNCTIONS IN: oxidoreductase activity%2C binding%2C catalytic activity%3B INVOLVED IN: oxidation reduction%2C metabolic process%3B LOCATED IN: cellular_component unknown%3B EXPRESSED IN: cotyledon%2C root%3B CONTAINS InterPro DOMAIN/s: NAD(P)-binding domain (InterPro:IPR016040)%2C Glucose/ribitol dehydrogenase (InterPro:IPR002347)%2C Short-chain…	*****	gene:2098286.UniProt:Q9SCU0	NA	'35.1'	'not assigned.annotated'	'Short-chain dehydrogenase reductase 2a OS=Arabidopsis thaliana (sp|q9scu0|sdr2a_arath : 397.0)'
Vitvi16g02067	453.615	-1.66799	0.355492	-4.69207	2.7046e-06	0.000355288	453.615	-3.18545	0.404443	-7.87615	3.37633e-15	3.23936e-13	453.615	-1.47752	0.356382	-4.14588	3.3851e-05	0.000290915	453.615	-3.14066	0.358417	-8.76261	1.90787e-18	2.51687e-16	VIT_16s0098g01000	NA	NA	NA	NA	NA	NA	NA	NA	NA	NA	NA	NA	NA	NA	NA	'35.2'	'not assigned.not annotated'	' no hits & (original description: none)'
Vitvi02g01273	13340.7	-1.67006	0.403341	-4.14057	3.46449e-05	0.00226938	13340.7	-3.89787	0.450602	-8.65038	5.13303e-18	8.70049e-16	13340.7	-4.33553	0.40381	-10.7366	6.85405e-27	7.14384e-24	13340.7	-3.10928	0.402918	-7.7169	1.19192e-14	8.59329e-13	VIT_02s0087g00750	AT1G55230.1	3.1e-110	397.1	1-to-1	NA	AT1G55230.1	proteinase inhibitor I4%2C serpin (DUF716)	NA	NA	NA	NA	Family of unknown function (DUF716) %3B INVOLVED IN: biological_process unknown%3B LOCATED IN: endomembrane system%3B CONTAINS InterPro DOMAIN/s: Protein of unknown function DUF716 (InterPro:IPR006904)%3B BEST Arabidopsis thaliana protein match is: Family of unknown function (DUF716) (TAIR:AT1G55240.1)%3B Has 423 Blast hits to 422 proteins in 52 species: Archae - 0%3B Bacteria - 0%3B Metazoa - 17…	*****	gene:2035745.UniProt:Q9C893	NA	'35.2'	'not assigned.not annotated'	' no hits & (original description: none)'
Vitvi19g02022	168.578	-1.67027	0.339563	-4.91889	8.70359e-07	0.000155833	168.578	-2.21488	0.398709	-5.55512	2.7742e-08	7.35497e-07	168.578	-2.78122	0.352024	-7.90067	2.7741e-15	2.37779e-13	168.578	-1.68437	0.338899	-4.97012	6.69111e-07	9.72721e-06	VIT_19s0090g00600	NA	NA	NA	NA	NA	NA	NA	NA	NA	NA	NA	NA	NA	NA	NA	'35.2'	'not assigned.not annotated'	' no hits & (original description: none)'
Vitvi05g01757	19140.1	-1.69727	0.391919	-4.33066	1.48661e-05	0.00129255	19140.1	-2.9669	0.438207	-6.77054	1.28306e-11	6.52437e-10	19140.1	-2.28192	0.39195	-5.82197	5.81582e-09	1.3008e-07	19140.1	-2.27961	0.391843	-5.81767	5.96747e-09	1.39464e-07		AT1G24020.1	1.4e-10	64.7	1-to-many	AT1G24020.2	AT1G24020.1	MLP-like protein 423	NA	"MLP423"	NA	MLP-like protein 423	MLP-like protein 423 (MLP423)%3B INVOLVED IN: response to biotic stimulus%2C defense response%3B LOCATED IN: membrane%3B EXPRESSED IN: 23 plant structures%3B EXPRESSED DURING: 15 growth stages%3B CONTAINS InterPro DOMAIN/s: Bet v I allergen (InterPro:IPR000916)%3B BEST Arabidopsis thaliana protein match is: MLP-like protein 28 (TAIR:AT1G70830.3)%3B Has 1440 Blast hits to 1404 proteins in 125 spec…	****	PMID:9332353.PMID:17432890.gene:2199931.UniProt:Q93VR4	NA	'35.1'	'not assigned.annotated'	'Major allergen Pru av 1 OS=Prunus avium (sp|o24248|pru1_pruav : 192.0)'
Vitvi07g00736	950.307	-1.70313	0.323804	-5.25976	1.44244e-07	3.87392e-05	950.307	-2.73252	0.363734	-7.51242	5.80459e-14	4.56909e-12	950.307	-1.46667	0.324304	-4.52254	6.11033e-06	6.55489e-05	950.307	-2.28084	0.323042	-7.0605	1.65907e-12	8.09777e-11	VIT_07s0005g04890	AT2G29420.1	2.4e-49	194.5	1-to-1	NA	AT2G29420.1	glutathione S-transferase tau 7	Encodes glutathione transferase belonging to the tau class of GSTs. Naming convention according to Wagner et al. (2002). Induced by Salicylic acid. Independent of NPR1 for their induction by salicylic acid.	"GSTU7"	ATGSTU7.glutathione S-transferase tau 7.GST25.GLUTATHIONE S-TRANSFERASE 25	glutathione S-transferase tau 7	glutathione S-transferase tau 7 (GSTU7)%3B CONTAINS InterPro DOMAIN/s: Thioredoxin fold (InterPro:IPR012335)%2C Glutathione S-transferase%2C C-terminal (InterPro:IPR004046)%2C Glutathione S-transferase%2C C-terminal-like (InterPro:IPR010987)%2C Glutathione S-transferase/chloride channel%2C C-terminal (InterPro:IPR017933)%2C Glutathione S-transferase%2C N-terminal (InterPro:IPR004045)%2C Thioredox…	*****	PMID:18334669.gene:2043111.UniProt:Q9ZW24	NA	'18.12.1.4'	'Protein modification.S-glutathionylation and deglutathionylation.glutathione S-transferase activities.class tau'	'Protein modification.S-glutathionylation and deglutathionylation.glutathione S-transferase activities.class tau (original description: none)'
Vitvi13g02018	95.2246	-1.70671	0.446947	-3.81861	0.000134208	0.00622636	95.2246	-3.60904	0.508894	-7.09194	1.32249e-12	7.89305e-11	95.2246	-2.42637	0.432323	-5.61239	1.99552e-08	3.9362e-07	95.2246	-2.93679	0.450326	-6.52147	6.96233e-11	2.42518e-09	VIT_13s0019g02780	AT3G46230.1	8.5e-57	218.4	1-to-many	AT5G59720.1	AT3G46230.1	heat shock protein 17.4	member of the class I small heat-shock protein (sHSP) family%2C which accounts for the majority of sHSPs in maturing seeds	"HSP17.4"	ATHSP17.4.ARABIDOPSIS THALIANA HEAT SHOCK PROTEIN 17.4	heat shock protein 17.4	heat shock protein 17.4 (HSP17.4)%3B INVOLVED IN: response to heat%3B LOCATED IN: cellular_component unknown%3B EXPRESSED IN: 15 plant structures%3B EXPRESSED DURING: M germinated pollen stage%2C LP.04 four leaves visible%2C 4 anthesis%2C C globular stage%2C petal differentiation and expansion stage%3B CONTAINS InterPro DOMAIN/s: Heat shock protein Hsp20 (InterPro:IPR002068)%2C HSP20-like chapero…	*****	PMID:8883386.PMID:17220197.gene:2075255.UniProt:P19036	NA	'26.3.2.5.1'	'External stimuli response.temperature.Hsp (heat-shock-responsive protein) families.sHsp (small heat-shock-responsive protein) families.class-C-I protein'	'External stimuli response.temperature.Hsp (heat-shock-responsive protein) families.sHsp (small heat-shock-responsive protein) families.class-C-I protein (original description: none)'
Vitvi08g02217	2340.43	-1.7072	0.285299	-5.98391	2.17845e-09	1.46265e-06	2340.43	-1.67203	0.317229	-5.27073	1.35882e-07	3.07367e-06	2340.43	-1.74736	0.286404	-6.10105	1.05375e-09	2.85124e-08	2340.43	-1.76735	0.283724	-6.22911	4.69085e-10	1.38005e-08	VIT_08s0007g01190	AT1G34300.1	8.5e-103	373.6	1-to-1	NA	AT1G34300.1	lectin protein kinase family protein	NA	NA	NA	NA	lectin protein kinase family protein%3B FUNCTIONS IN: in 6 functions%3B INVOLVED IN: protein amino acid phosphorylation%2C recognition of pollen%3B LOCATED IN: plasma membrane%3B EXPRESSED IN: 23 plant structures%3B EXPRESSED DURING: 13 growth stages%3B CONTAINS InterPro DOMAIN/s: Curculin-like (mannose-binding) lectin (InterPro:IPR001480)%2C Protein kinase%2C ATP binding site (InterPro:IPR017441…	*****	PMID:17317660.PMID:17644812.PMID:21075962.gene:2026154.UniProt:Q9XID3	NA	'18.8.1.24.2'	'Protein modification.phosphorylation.TKL kinase superfamily.G-Lectin kinase families.SD-2 kinase'	'Protein modification.phosphorylation.TKL kinase superfamily.G-Lectin kinase families.SD-2 kinase (original description: none)'
Vitvi15g01505	411.514	-1.71917	0.339618	-5.06205	4.1477e-07	8.79421e-05	411.514	-2.94263	0.382445	-7.69427	1.42305e-14	1.23484e-12	411.514	-1.43825	0.335115	-4.29182	1.77214e-05	0.000165567	411.514	-2.96436	0.335591	-8.83326	1.01667e-18	1.41654e-16	VIT_15s0048g01080	AT5G62150.1	2.9e-26	116.7	1-to-1	NA	AT5G62150.1	peptidoglycan-binding LysM domain-containing protein	NA	NA	NA	NA	peptidoglycan-binding LysM domain-containing protein%3B FUNCTIONS IN: molecular_function unknown%3B INVOLVED IN: cell wall macromolecule catabolic process%3B LOCATED IN: endomembrane system%3B EXPRESSED IN: 15 plant structures%3B EXPRESSED DURING: 6 growth stages%3B BEST Arabidopsis thaliana protein match is: peptidoglycan-binding LysM domain-containing protein (TAIR:AT4G25433.1)%3B Has 63 Blast …	*****	gene:2174092.UniProt:Q9FIS3	NA	'35.2'	'not assigned.not annotated'	' no hits & (original description: none)'
Vitvi11g00140	1596.59	-1.7194	0.339892	-5.05867	4.22192e-07	8.87374e-05	1596.59	-4.3134	0.383004	-11.262	2.02081e-29	2.8544e-26	1596.59	-3.11344	0.340871	-9.13376	6.6163e-20	1.72401e-17	1596.59	-4.38588	0.343483	-12.7689	2.44715e-37	7.58646e-34	VIT_11s0016g01810	AT5G12010.1	6.8e-165	578.9	1-to-1	NA	AT5G12010.1	nuclease	NA	NA	NA	NA	unknown protein%3B INVOLVED IN: response to salt stress%3B LOCATED IN: chloroplast%2C plasma membrane%2C membrane%3B EXPRESSED IN: 23 plant structures%3B EXPRESSED DURING: 13 growth stages%3B BEST Arabidopsis thaliana protein match is: unknown protein (TAIR:AT4G29780.1)%3B Has 1807 Blast hits to 1807 proteins in 277 species: Archae - 0%3B Bacteria - 0%3B Metazoa - 736%3B Fungi - 347%3B Plants - 3…	*****	PMID:11351099.PMID:15060130.PMID:17151019.PMID:17432890.PMID:18431481.gene:2143103.UniProt:Q9LYH2	NA	'35.1'	'not assigned.annotated'	'Protein ALP1-like OS=Arabidopsis thaliana (sp|q9m2u3|alpl_arath : 142.0)'
Vitvi16g01484	50131.7	-1.72671	0.387446	-4.45664	8.32546e-06	0.000871146	50131.7	-2.19434	0.433246	-5.06488	4.08659e-07	8.35892e-06	50131.7	-1.27708	0.38744	-3.2962	0.000980013	0.00509298	50131.7	-1.6303	0.387461	-4.20765	2.58035e-05	0.00024766	VIT_16s0100g01200	AT5G13930.1	8.1e-147	518.8	1-to-1	NA	AT5G13930.1	Chalcone and stilbene synthase family protein	Encodes chalcone synthase (CHS)%2C a key enzyme involved in the biosynthesis of flavonoids. Required for the accumulation of purple anthocyanins in leaves and stems. Also involved in the regulation of auxin transport and the modulation of root gravitropism.	"TT4"	ATCHS.CHS.CHALCONE SYNTHASE	TRANSPARENT TESTA 4	TRANSPARENT TESTA 4 (TT4)%3B FUNCTIONS IN: naringenin-chalcone synthase activity%3B INVOLVED IN: in 11 processes%3B LOCATED IN: plant-type vacuole membrane%2C endoplasmic reticulum%2C nucleus%3B EXPRESSED IN: 22 plant structures%3B EXPRESSED DURING: 14 growth stages%3B CONTAINS InterPro DOMAIN/s: Chalcone/stilbene synthase%2C N-terminal (InterPro:IPR001099)%2C Thiolase-like (InterPro:IPR016039)%2…	****	PMID:10987549.PMID:10677434.PMID:10631255.PMID:10536025.PMID:9794081.PMID:9501110.PMID:8672888.PMID:8685272.PMID:8528278.PMID:8528277.PMID:2780550.PMID:3386631.PMID:11080303.PMID:11139518.PMID:11136235.PMID:11402184.PMID:12271060.PMID:12212845.PMID:1840523.PMID:14617075.PMID:14966245.PMID:15100399.PMID:15053760.PMID:15208397.PMID:15185374.PMID:15347797.PMID:15705950.PMID:15705952.PMID:15781573.PM…	"VviSTS48"	'9.2.2.1'	'Secondary metabolism.phenolics.flavonoid synthesis and modification.chalcone synthase'	'Secondary metabolism.phenolics.flavonoid synthesis and modification.chalcone synthase (original description: none)'
Vitvi02g01182	2113.44	-1.72727	0.324609	-5.32109	1.03146e-07	2.92484e-05	2113.44	-3.64636	0.365452	-9.97765	1.90933e-23	7.24549e-21	2113.44	-1.91318	0.324928	-5.88801	3.90874e-09	9.19223e-08	2113.44	-3.39826	0.32764	-10.3719	3.32769e-25	1.11527e-22	VIT_02s0033g01380	AT1G32350.2	3.1e-89	327.4	1-to-1	NA	AT1G32350.2	alternative oxidase 1D	NA	"AOX1D"	NA	alternative oxidase 1D	NA	NA	NA	NA	'2.4.2.2'	'Cellular respiration.oxidative phosphorylation.alternative NAD(P)H dehydrogenase activities.alternative oxidase'	'Cellular respiration.oxidative phosphorylation.alternative NAD(P)H dehydrogenase activities.alternative oxidase (original description: none)'
Vitvi09g00085	4993.32	-1.72995	0.311078	-5.56114	2.68021e-08	1.04489e-05	4993.32	-2.98154	0.348181	-8.5632	1.09776e-17	1.73357e-15	4993.32	-2.54748	0.31085	-8.19519	2.50196e-16	2.7164e-14	4993.32	-2.77118	0.311438	-8.89804	5.68412e-19	8.39118e-17	VIT_09s0002g01080	AT1G17420.1	2.1e-215	748	1-to-1	NA	AT1G17420.1	lipoxygenase 3	LOX3 encode a Lipoxygenase. Lipoxygenases (LOXs) catalyze the oxygenation of fatty acids (FAs).	"LOX3"	ATLOX3.Arabidopsis thaliana lipoxygenase 3	lipoxygenase 3	lipoxygenase 3 (LOX3)%3B FUNCTIONS IN: oxidoreductase activity%2C acting on single donors with incorporation of molecular oxygen%2C incorporation of two atoms of oxygen%2C lipoxygenase activity%2C iron ion binding%2C metal ion binding%3B INVOLVED IN: growth%2C response to fungus%2C jasmonic acid biosynthetic process%2C response to wounding%2C defense response%3B LOCATED IN: chloroplast%3B EXPRESS…	*****	PMID:8702864.PMID:9232884.PMID:18214527.gene:3690052.UniProt:Q9LNR3	NA	'50.1.12'	'Enzyme classification.EC_1 oxidoreductases.EC_1.13 oxidoreductase acting on single donor with incorporation of molecular oxygen (oxygenase)'	'Enzyme classification.EC_1 oxidoreductases.EC_1.13 oxidoreductase acting on single donor with incorporation of molecular oxygen (oxygenase)(50.1.12 : 534.3) & Linoleate 13S-lipoxygenase 3-1. chloroplastic OS=Solanum tuberosum (sp|o24371|lox31_soltu : 407.0) (original description: none)'
Vitvi15g01508	434.952	-1.73138	0.403588	-4.28997	1.78696e-05	0.00144457	434.952	-2.15514	0.444375	-4.84982	1.23576e-06	2.17585e-05	434.952	-2.00042	0.406308	-4.9234	8.50549e-07	1.13655e-05	434.952	-2.2012	0.397956	-5.53126	3.17944e-08	6.2982e-07	VIT_15s0048g01350	AT2G45600.1	2.1e-98	357.5	1-to-1	NA	AT2G45600.1	alpha/beta-Hydrolases superfamily protein	NA	NA	NA	NA	alpha/beta-Hydrolases superfamily protein%3B FUNCTIONS IN: hydrolase activity%3B INVOLVED IN: metabolic process%3B LOCATED IN: cellular_component unknown%3B EXPRESSED IN: 20 plant structures%3B EXPRESSED DURING: 8 growth stages%3B CONTAINS InterPro DOMAIN/s: Lipase%2C GDXG%2C active site (InterPro:IPR002168)%2C Alpha/beta hydrolase fold-3 (InterPro:IPR013094)%3B BEST Arabidopsis thaliana protein …	*****	PMID:16247729.gene:2043643.UniProt:O64640	NA	'35.1'	'not assigned.annotated'	'Probable carboxylesterase 8 OS=Arabidopsis thaliana (sp|o64640|cxe8_arath : 311.0)'
Vitvi08g01747	204.09	-1.73268	0.434144	-3.99103	6.57869e-05	0.00369478	204.09	-3.11341	0.487832	-6.38212	1.74651e-10	7.29146e-09	204.09	-2.02307	0.434037	-4.66106	3.1459e-06	3.63838e-05	204.09	-2.98367	0.439513	-6.78858	1.13244e-11	4.63866e-10	VIT_08s0007g06610	AT5G06740.1	1.7e-182	637.5	1-to-many	AT5G06740.2	AT5G06740.1	Concanavalin A-like lectin protein kinase family protein	NA	NA	LecRK-S.5.L-type lectin receptor kinase S.5	NA	Concanavalin A-like lectin protein kinase family protein%3B FUNCTIONS IN: in 6 functions%3B INVOLVED IN: protein amino acid phosphorylation%3B LOCATED IN: endomembrane system%3B EXPRESSED IN: root%3B CONTAINS InterPro DOMAIN/s: Legume lectin%2C beta chain (InterPro:IPR001220)%2C Protein kinase%2C ATP binding site (InterPro:IPR017441)%2C Serine/threonine-protein kinase-like domain (InterPro:IPR017…	***	gene:2170223.UniProt:Q9FG33	NA	'18.8.1.19'	'Protein modification.phosphorylation.TKL kinase superfamily.L-lectin kinase'	'Protein modification.phosphorylation.TKL kinase superfamily.L-lectin kinase (original description: none)'
Vitvi17g00788	505.426	-1.73627	0.311377	-5.5761	2.45973e-08	9.90902e-06	505.426	-3.28097	0.354811	-9.24709	2.30684e-20	5.63955e-18	505.426	-2.40557	0.31378	-7.6664	1.76893e-14	1.25937e-12	505.426	-3.79149	0.312263	-12.142	6.32846e-34	1.04635e-30	VIT_17s0000g08100	AT2G16890.2	1.3e-79	297	1-to-many	AT2G16890.3	AT2G16890.2	UDP-Glycosyltransferase superfamily protein	NA	NA	NA	NA	UDP-Glycosyltransferase superfamily protein%3B FUNCTIONS IN: transferase activity%2C transferring hexosyl groups%2C UDP-glycosyltransferase activity%2C transferase activity%2C transferring glycosyl groups%3B INVOLVED IN: metabolic process%3B LOCATED IN: endomembrane system%3B EXPRESSED IN: 17 plant structures%3B EXPRESSED DURING: 7 growth stages%3B CONTAINS InterPro DOMAIN/s: UDP-glucuronosyl/UDP…	****	gene:1005027844.UniProt:Q9ZVX4	NA	'50.2.4'	'Enzyme classification.EC_2 transferases.EC_2.4 glycosyltransferase'	'UDP-glycosyltransferase 90A1 OS=Arabidopsis thaliana (sp|q9zvx4|u90a1_arath : 283.0) & Enzyme classification.EC_2 transferases.EC_2.4 glycosyltransferase(50.2.4 : 100.1) (original description: none)'
Vitvi11g00229	9909.27	-1.73707	0.470169	-3.69456	0.000220265	0.00922709	9909.27	-2.28979	0.525783	-4.35501	1.33061e-05	0.000173937	9909.27	-2.89607	0.469791	-6.16459	7.06642e-10	1.98892e-08	9909.27	-2.47219	0.470161	-5.25817	1.45497e-07	2.46481e-06	VIT_11s0016g02790	AT2G19810.1	2.1e-113	407.9	1-to-1	NA	AT2G19810.1	CCCH-type zinc finger family protein	Encodes Oxidation-related Zinc Finger 1 (OZF1)%2C a plasma membrane protein involved in oxidative stress.	"OZF1"	AtOZF1.AtTZF2.TZF2.tandem zinc finger 2	Oxidation-related Zinc Finger 1	CCCH-type zinc finger family protein%3B CONTAINS InterPro DOMAIN/s: Zinc finger%2C CCCH-type (InterPro:IPR000571)%3B BEST Arabidopsis thaliana protein match is: Zinc finger C-x8-C-x5-C-x3-H type family protein (TAIR:AT4G29190.1)%3B Has 721 Blast hits to 690 proteins in 126 species: Archae - 0%3B Bacteria - 0%3B Metazoa - 152%3B Fungi - 6%3B Plants - 412%3B Viruses - 0%3B Other Eukaryotes - 151 (s…	*****	PMID:11118137.gene:2052004.UniProt:O82199	NA	'15.7.16'	'RNA biosynthesis.transcriptional activation.C3H zinc finger transcription factor'	'RNA biosynthesis.transcriptional activation.C3H zinc finger transcription factor (original description: none)'
Vitvi14g02952	152.034	-1.73836	0.464194	-3.7449	0.000180464	0.00783537	152.034	-3.40121	0.518595	-6.55851	5.43481e-11	2.50781e-09	152.034	-1.61545	0.44944	-3.59435	0.000325197	0.00200034	152.034	-2.41311	0.456714	-5.28365	1.26639e-07	2.18412e-06	VIT_14s0068g01250	AT5G14040.1	7.3e-13	75.1	1-to-1	NA	AT5G14040.1	phosphate transporter 3%3B1	Encodes a mitochondrial phosphate transporter. Modulates plant responses to salt stress.	"PHT3%3B1"	MPT3.mitochondrial phosphate transporter 3	phosphate transporter 3%3B1	phosphate transporter 3%3B1 (PHT3%3B1)%3B FUNCTIONS IN: binding%3B INVOLVED IN: transport%2C transmembrane transport%3B LOCATED IN: in 6 components%3B EXPRESSED IN: 27 plant structures%3B EXPRESSED DURING: 16 growth stages%3B CONTAINS InterPro DOMAIN/s: Mitochondrial substrate carrier (InterPro:IPR001993)%2C Mitochondrial substrate/solute carrier (InterPro:IPR018108)%3B BEST Arabidopsis thaliana …	*****	PMID:14671022.PMID:15028209.PMID:15276431.PMID:16287169.PMID:16618929.PMID:17151019.PMID:17432890.gene:3442004.UniProt:Q9FMU6	NA	'35.2'	'not assigned.not annotated'	' no hits & (original description: none)'
Vitvi18g01276	1410.6	-1.74112	0.333486	-5.22096	1.78e-07	4.48172e-05	1410.6	-2.71185	0.373671	-7.25733	3.948e-13	2.63459e-11	1410.6	-1.69063	0.333475	-5.06975	3.98337e-07	5.77279e-06	1410.6	-2.53679	0.333804	-7.59965	2.96943e-14	2.00667e-12	VIT_18s0166g00190	AT5G64660.1	7.5e-92	335.9	1-to-1	NA	AT5G64660.1	CYS%2C MET%2C PRO%2C and GLY protein 2	NA	"CMPG2"	ATCMPG2	CYS%2C MET%2C PRO%2C and GLY protein 2	CYS%2C MET%2C PRO%2C and GLY protein 2 (CMPG2)%3B FUNCTIONS IN: ubiquitin-protein ligase activity%2C binding%3B INVOLVED IN: response to chitin%3B LOCATED IN: ubiquitin ligase complex%3B EXPRESSED IN: 23 plant structures%3B EXPRESSED DURING: 11 growth stages%3B CONTAINS InterPro DOMAIN/s: U box domain (InterPro:IPR003613)%2C Armadillo-like helical (InterPro:IPR011989)%2C Armadillo-type fold (Inte…	*****	PMID:17722694.gene:2174813.UniProt:Q9FLF4	NA	'19.4.1.5.2.1'	'Protein degradation.peptide tagging.Ubiquitin (UBQ)-anchor addition (ubiquitylation).UBQ-ligase E3 activities.U-Box E3 ligase activities.PUB-type'	'Protein degradation.peptide tagging.Ubiquitin (UBQ)-anchor addition (ubiquitylation).UBQ-ligase E3 activities.U-Box E3 ligase activities.PUB-type (original description: none)'
Vitvi06g00642	162.831	-1.74446	0.326888	-5.33657	9.47224e-08	2.75847e-05	162.831	-1.51907	0.289545	-5.24641	1.55093e-07	3.45898e-06	162.831	-1.88033	0.339836	-5.53305	3.14701e-08	5.91642e-07	162.831	-1.13916	0.250467	-4.54815	5.41207e-06	6.31785e-05	VIT_06s0004g06600	AT2G29950.1	3.1e-15	80.5	1-to-1	NA	AT2G29950.1	ELF4-like 1	NA	"ELF4-L1"	NA	ELF4-like 1	ELF4-like 1 (ELF4-L1)%3B CONTAINS InterPro DOMAIN/s: Protein of unknown function DUF1313 (InterPro:IPR009741)%3B BEST Arabidopsis thaliana protein match is: Protein of unknown function (DUF1313) (TAIR:AT2G40080.1)%3B Has 147 Blast hits to 146 proteins in 34 species: Archae - 0%3B Bacteria - 0%3B Metazoa - 0%3B Fungi - 0%3B Plants - 146%3B Viruses - 0%3B Other Eukaryotes - 1 (source: NCBI BLink).	*****	gene:2045672.UniProt:O80877	NA	'27.1.5.3.3'	'Multi-process regulation.circadian clock.evening element regulation.Evening complex (EC).ELF4 component'	'Multi-process regulation.circadian clock.evening element regulation.Evening complex (EC).ELF4 component (original description: none)'
Vitvi01g01680	2488.57	-1.75638	0.325166	-5.40148	6.60916e-08	2.07467e-05	2488.57	-3.22886	0.364394	-8.8609	7.93694e-19	1.49479e-16	2488.57	-1.72051	0.324581	-5.30072	1.1535e-07	1.89036e-06	2488.57	-2.74265	0.325056	-8.43748	3.24255e-17	3.59012e-15	VIT_01s0010g03930	AT5G13080.1	5.7e-23	107.1	1-to-1	NA	AT5G13080.1	WRKY DNA-binding protein 75	WRKY75 is one of several transcription factors induced during Pi deprivation. It is nuclear localized and regulated differentially during Pi starvation. RNAi mediated suppression of WRKY75 made the plants more susceptible to Pi stress as indicated by the higher accumulation of anthocyanin during Pi starvation.	"WRKY75"	ATWRKY75.ARABIDOPSIS THALIANA WRKY DNA-BINDING PROTEIN 75	WRKY DNA-binding protein 75	WRKY DNA-binding protein 75 (WRKY75)%3B CONTAINS InterPro DOMAIN/s: DNA-binding WRKY (InterPro:IPR003657)%3B BEST Arabidopsis thaliana protein match is: WRKY DNA-binding protein 45 (TAIR:AT3G01970.1)%3B Has 1807 Blast hits to 1807 proteins in 277 species: Archae - 0%3B Bacteria - 0%3B Metazoa - 736%3B Fungi - 347%3B Plants - 385%3B Viruses - 0%3B Other Eukaryotes - 339 (source: NCBI BLink).	****	PMID:11118137.PMID:17322336.gene:2179861.UniProt:Q9FYA2	"WRKY75"	'15.7.22'	'RNA biosynthesis.transcriptional activation.WRKY transcription factor'	'RNA biosynthesis.transcriptional activation.WRKY transcription factor (original description: none)'
Vitvi09g00012	5740.9	-1.75925	0.398267	-4.41726	9.99582e-06	0.000975059	5740.9	-3.86263	0.446162	-8.65745	4.82455e-18	8.23249e-16	5740.9	-3.55897	0.398442	-8.93221	4.17581e-19	8.84627e-17	5740.9	-3.83941	0.399064	-9.62103	6.51736e-22	1.45619e-19	VIT_09s0002g00220	AT1G53820.1	5.1e-47	187.2	1-to-1	NA	AT1G53820.1	RING/U-box superfamily protein	NA	NA	NA	NA	RING/U-box superfamily protein%3B FUNCTIONS IN: zinc ion binding%3B CONTAINS InterPro DOMAIN/s: Zinc finger%2C RING-type (InterPro:IPR001841)%2C Zinc finger%2C C3HC4 RING-type (InterPro:IPR018957)%3B BEST Arabidopsis thaliana protein match is: RING/U-box superfamily protein (TAIR:AT1G72310.1)%3B Has 9301 Blast hits to 9282 proteins in 297 species: Archae - 0%3B Bacteria - 0%3B Metazoa - 2391%3B F…	*****	gene:2197025.UniProt:P0C035	NA	'19.4.1.5.3.4'	'Protein degradation.peptide tagging.Ubiquitin (UBQ)-anchor addition (ubiquitylation).UBQ-ligase E3 activities.RING-domain E3 ligase activities.RING-H2-type E3 ligase'	'Protein degradation.peptide tagging.Ubiquitin (UBQ)-anchor addition (ubiquitylation).UBQ-ligase E3 activities.RING-domain E3 ligase activities.RING-H2-type E3 ligase (original description: none)'
Vitvi10g00309	1618.42	-1.76487	0.29602	-5.96199	2.49187e-09	1.62786e-06	1618.42	-4.42967	0.338987	-13.0674	5.05859e-39	3.21537e-35	1618.42	-2.53938	0.29889	-8.49603	1.96193e-17	2.69063e-15	1618.42	-3.63641	0.299098	-12.1579	5.20677e-34	9.22379e-31	VIT_00s0409g00010	AT4G05200.1	2.1e-49	198.4	1-to-many	AT4G05200.2	AT4G05200.1	cysteine-rich RLK (RECEPTOR-like protein kinase) 25	Encodes a cysteine-rich receptor-like protein kinase.	"CRK25"	NA	cysteine-rich RLK (RECEPTOR-like protein kinase) 25	cysteine-rich RLK (RECEPTOR-like protein kinase) 25 (CRK25)%3B FUNCTIONS IN: kinase activity%3B INVOLVED IN: protein amino acid phosphorylation%3B LOCATED IN: endomembrane system%3B EXPRESSED IN: root%3B CONTAINS InterPro DOMAIN/s: Protein kinase%2C ATP binding site (InterPro:IPR017441)%2C Protein kinase%2C catalytic domain (InterPro:IPR000719)%2C Protein of unknown function DUF26 (InterPro:IPR00…	***	gene:3438468.UniProt:Q9M0X5	NA	'50.2.7'	'Enzyme classification.EC_2 transferases.EC_2.7 transferase transferring phosphorus-containing group'	'Retrovirus-related Pol polyprotein from transposon RE1 OS=Arabidopsis thaliana (sp|q94hw2|polr1_arath : 186.0) & Enzyme classification.EC_2 transferases.EC_2.7 transferase transferring phosphorus-containing group(50.2.7 : 92.2) (original description: none)'
Vitvi04g00216	1386.38	-1.76861	0.390613	-4.52777	5.96098e-06	0.000676445	1386.38	-2.52361	0.437293	-5.77097	7.88144e-09	2.34919e-07	1386.38	-1.85839	0.394735	-4.70794	2.50236e-06	2.97181e-05	1386.38	-2.67243	0.391175	-6.8318	8.3855e-12	3.53445e-10	VIT_04s0008g02510	AT1G70250.1	1.3e-71	269.2	1-to-1	NA	AT1G70250.1	receptor serine/threonine kinase	Encodes a Protease inhibitor/seed storage/LTP family protein	NA	NA	NA	receptor serine/threonine kinase%2C putative%3B FUNCTIONS IN: protein serine/threonine kinase activity%2C transmembrane receptor protein serine/threonine kinase activity%2C protein kinase activity%2C ATP binding%3B INVOLVED IN: protein amino acid phosphorylation%3B LOCATED IN: endomembrane system%3B EXPRESSED IN: 20 plant structures%3B EXPRESSED DURING: 11 growth stages%3B CONTAINS InterPro DOMAI…	***	PMID:17565583.gene:2020582.UniProt:F4I5D4	NA	'18.8.1.45'	'Protein modification.phosphorylation.TKL kinase superfamily.RLCK-Os kinase'	'Protein modification.phosphorylation.TKL kinase superfamily.RLCK-Os kinase (original description: none)'
Vitvi04g01845	45.3586	-1.76879	0.471921	-3.74805	0.000178211	0.00780352	45.3586	-2.90115	0.687205	-4.22167	2.42496e-05	0.000295139	45.3586	-2.57793	0.496396	-5.19329	2.06612e-07	3.18372e-06	45.3586	-2.08198	0.525478	-3.96208	7.43004e-05	0.000618987	VIT_04s0008g03500	AT1G10340.1	6e-08	56.2	1-to-many	AT1G10340.2	AT1G10340.1	Ankyrin repeat family protein	NA	NA	NA	NA	Ankyrin repeat family protein%3B CONTAINS InterPro DOMAIN/s: Ankyrin repeat-containing domain (InterPro:IPR020683)%2C Ankyrin repeat (InterPro:IPR002110)%3B BEST Arabidopsis thaliana protein match is: Ankyrin repeat family protein (TAIR:AT2G24600.4)%3B Has 23228 Blast hits to 12811 proteins in 577 species: Archae - 31%3B Bacteria - 1612%3B Metazoa - 12827%3B Fungi - 1604%3B Plants - 2793%3B Virus…	****	gene:2012872.UniProt:Q9SY76	NA	'35.2'	'not assigned.not annotated'	' no hits & (original description: none)'
Vitvi18g02138	1550.74	-1.77253	0.349448	-5.07238	3.92866e-07	8.40351e-05	1550.74	-4.19753	0.406451	-10.3273	5.30513e-25	2.5939e-22	1550.74	-2.14926	0.350335	-6.13488	8.52229e-10	2.34493e-08	1550.74	-3.74083	0.355108	-10.5344	5.99953e-26	2.25446e-23	VIT_18s0041g02010	AT1G76680.2	5.1e-110	396.7	1-to-1	NA	AT1G76680.2	12-oxophytodienoate reductase 1	Encodes a member of an alpha/beta barrel fold family of FMN-containing oxidoreductases. One of the closely related 12-oxophytodienoic acid reductases. This enzyme is not expected to participate in jasmonic acid biosynthesis because during in vitro assays%2C it shows very little activity with the naturally occurring OPDA isomer. Shows activity towards 2%2C4%2C6-trinitrotoluene. Expressed predomina…	"OPR1"	ATOPR1.ARABIDOPSIS 12-OXOPHYTODIENOATE REDUCTASE 1	12-oxophytodienoate reductase 1	12-oxophytodienoate reductase 1 (OPR1)%3B FUNCTIONS IN: 12-oxophytodienoate reductase activity%3B INVOLVED IN: in 7 processes%3B LOCATED IN: cellular_component unknown%3B EXPRESSED IN: 11 plant structures%3B EXPRESSED DURING: seedling growth%2C developing seed stage%3B CONTAINS InterPro DOMAIN/s: Aldolase-type TIM barrel (InterPro:IPR013785)%2C NADH:flavin oxidoreductase/NADH oxidase%2C N-termina…	****	PMID:16502469.gene:1006229773.UniProt:F4I403	NA	'50.1.3'	'Enzyme classification.EC_1 oxidoreductases.EC_1.3 oxidoreductase acting on CH-CH group of donor'	'Enzyme classification.EC_1 oxidoreductases.EC_1.3 oxidoreductase acting on CH-CH group of donor(50.1.3 : 463.6) & 12-oxophytodienoate reductase 1 OS=Solanum lycopersicum (sp|q9xg54|opr1_sollc : 391.0) (original description: none)'
Vitvi14g00786	146.807	-1.77788	0.425993	-4.17349	2.99967e-05	0.00207751	146.807	-2.40658	0.497805	-4.83437	1.33569e-06	2.32943e-05	146.807	-1.74788	0.423	-4.1321	3.5946e-05	0.000306093	146.807	-1.70578	0.431036	-3.9574	7.57697e-05	0.000628273	VIT_14s0006g00300	AT1G14860.1	3.2e-23	107.8	1-to-1	NA	AT1G14860.1	nudix hydrolase homolog 18	NA	"NUDT18"	atnudt18.nudix hydrolase homolog 18	nudix hydrolase homolog 18	nudix hydrolase homolog 18 (NUDT18)%3B FUNCTIONS IN: hydrolase activity%3B INVOLVED IN: biological_process unknown%3B CONTAINS InterPro DOMAIN/s: NUDIX hydrolase domain-like (InterPro:IPR015797)%2C NUDIX hydrolase%2C conserved site (InterPro:IPR020084)%2C NUDIX hydrolase domain (InterPro:IPR000086)%3B BEST Arabidopsis thaliana protein match is: nudix hydrolase homolog 17 (TAIR:AT2G01670.1)%3B Has…	*****	gene:2006816.UniProt:Q9LQU5	NA	'35.1'	'not assigned.annotated'	'Nudix hydrolase 18. mitochondrial OS=Arabidopsis thaliana (sp|q9lqu5|nud18_arath : 105.0)'
Vitvi10g02229	4058.85	-1.78002	0.313825	-5.67202	1.41124e-08	6.43607e-06	4058.85	-4.16387	0.352277	-11.8199	3.08141e-32	8.70497e-29	4058.85	-3.0952	0.315987	-9.79534	1.17897e-22	5.79632e-20	4058.85	-3.7252	0.314252	-11.8542	2.04704e-32	2.30767e-29	VIT_00s0748g00020	AT4G23180.2	1.7e-70	266.2	1-to-1	NA	AT4G23180.2	cysteine-rich RLK (RECEPTOR-like protein kinase) 10	NA	"CRK10"	RLK4	cysteine-rich RLK (RECEPTOR-like protein kinase) 10	NA	NA	NA	NA	'50.2.7'	'Enzyme classification.EC_2 transferases.EC_2.7 transferase transferring phosphorus-containing group'	'Cysteine-rich receptor-like protein kinase 29 OS=Arabidopsis thaliana (sp|q8s9l6|crk29_arath : 206.0) & Enzyme classification.EC_2 transferases.EC_2.7 transferase transferring phosphorus-containing group(50.2.7 : 91.9) (original description: none)'
Vitvi09g01936	42.195	-1.79157	0.324693	-5.51773	3.43401e-08	1.25763e-05	42.195	-1.87329	0.460432	-4.06854	4.73091e-05	0.00052229	42.195	-1.84878	0.333759	-5.53924	3.0378e-08	5.73594e-07	42.195	-1.9858	0.370896	-5.35405	8.60059e-08	1.54344e-06	VIT_09s0054g00110	AT5G10695.1	8e-05	45.4	1-to-1	NA	AT5G10695.1	methionyl-tRNA synthetase	NA	NA	NA	NA	unknown protein%3B BEST Arabidopsis thaliana protein match is: unknown protein (TAIR:AT5G57123.1)%3B Has 30201 Blast hits to 17322 proteins in 780 species: Archae - 12%3B Bacteria - 1396%3B Metazoa - 17338%3B Fungi - 3422%3B Plants - 5037%3B Viruses - 0%3B Other Eukaryotes - 2996 (source: NCBI BLink).	*****	gene:3708756.UniProt:Q8RXY3	NA	'35.2'	'not assigned.not annotated'	' no hits & (original description: none)'
Vitvi12g00300	2220.7	-1.79416	0.413944	-4.33431	1.4622e-05	0.00128054	2220.7	-2.97504	0.460857	-6.45544	1.07905e-10	4.60314e-09	2220.7	-2.4354	0.412874	-5.89866	3.66475e-09	8.68112e-08	2220.7	-2.51897	0.411775	-6.11735	9.51431e-10	2.61601e-08		AT4G04960.1	1.9e-209	727.2	1-to-1	NA	AT4G04960.1	Concanavalin A-like lectin protein kinase family protein	NA	NA	LecRK-VII.1.L-type lectin receptor kinase VII.1	NA	Concanavalin A-like lectin protein kinase family protein%3B FUNCTIONS IN: kinase activity%3B INVOLVED IN: protein amino acid phosphorylation%3B LOCATED IN: endomembrane system%3B EXPRESSED IN: 21 plant structures%3B EXPRESSED DURING: 12 growth stages%3B CONTAINS InterPro DOMAIN/s: Legume lectin%2C beta chain (InterPro:IPR001220)%2C Protein kinase%2C ATP binding site (InterPro:IPR017441)%2C Serine…	*****	gene:2138380.UniProt:Q9S9U1	NA	'18.8.1.19'	'Protein modification.phosphorylation.TKL kinase superfamily.L-lectin kinase'	'Protein modification.phosphorylation.TKL kinase superfamily.L-lectin kinase (original description: none)'
Vitvi07g00147	749.944	-1.80083	0.447033	-4.0284	5.61566e-05	0.00328659	749.944	-2.5322	0.522339	-4.8478	1.2484e-06	2.19354e-05	749.944	-4.39778	0.444808	-9.88691	4.7444e-23	2.57552e-20	749.944	-3.06381	0.461349	-6.64097	3.11619e-11	1.17276e-09	VIT_07s0104g00190	AT1G03220.1	6.7e-106	382.5	1-to-1	NA	AT1G03220.1	Eukaryotic aspartyl protease family protein	NA	NA	NA	NA	Eukaryotic aspartyl protease family protein%3B FUNCTIONS IN: aspartic-type endopeptidase activity%3B INVOLVED IN: response to salt stress%3B LOCATED IN: cell wall%2C plasma membrane%2C membrane%2C plant-type cell wall%3B EXPRESSED IN: 6 plant structures%3B CONTAINS InterPro DOMAIN/s: Peptidase aspartic (InterPro:IPR021109)%2C Peptidase aspartic%2C catalytic (InterPro:IPR009007)%2C Peptidase A1 (I…	*****	PMID:11351099.PMID:14595688.PMID:15593128.PMID:16618929.PMID:17432890.PMID:17526915.PMID:17916636.PMID:21166475.gene:2014474.UniProt:Q9ZVS4	NA	'19.5.3.1'	'Protein degradation.peptidase families.aspartic-type peptidase activities.pepsin-type protease'	'Protein degradation.peptidase families.aspartic-type peptidase activities.pepsin-type protease (original description: none)'
Vitvi16g01470	24868.2	-1.80267	0.427258	-4.21917	2.45203e-05	0.00175869	24868.2	-2.27117	0.477572	-4.75566	1.97803e-06	3.26144e-05	24868.2	-1.4055	0.427308	-3.2892	0.00100471	0.00519751	24868.2	-2.38849	0.427121	-5.59208	2.24364e-08	4.59873e-07	VIT_16s0100g01010	AT5G13930.1	9.3e-149	525.4	1-to-1	NA	AT5G13930.1	Chalcone and stilbene synthase family protein	Encodes chalcone synthase (CHS)%2C a key enzyme involved in the biosynthesis of flavonoids. Required for the accumulation of purple anthocyanins in leaves and stems. Also involved in the regulation of auxin transport and the modulation of root gravitropism.	"TT4"	ATCHS.CHS.CHALCONE SYNTHASE	TRANSPARENT TESTA 4	TRANSPARENT TESTA 4 (TT4)%3B FUNCTIONS IN: naringenin-chalcone synthase activity%3B INVOLVED IN: in 11 processes%3B LOCATED IN: plant-type vacuole membrane%2C endoplasmic reticulum%2C nucleus%3B EXPRESSED IN: 22 plant structures%3B EXPRESSED DURING: 14 growth stages%3B CONTAINS InterPro DOMAIN/s: Chalcone/stilbene synthase%2C N-terminal (InterPro:IPR001099)%2C Thiolase-like (InterPro:IPR016039)%2…	****	PMID:10987549.PMID:10677434.PMID:10631255.PMID:10536025.PMID:9794081.PMID:9501110.PMID:8672888.PMID:8685272.PMID:8528278.PMID:8528277.PMID:2780550.PMID:3386631.PMID:11080303.PMID:11139518.PMID:11136235.PMID:11402184.PMID:12271060.PMID:12212845.PMID:1840523.PMID:14617075.PMID:14966245.PMID:15100399.PMID:15053760.PMID:15208397.PMID:15185374.PMID:15347797.PMID:15705950.PMID:15705952.PMID:15781573.PM…	"VviSTS29"	'9.2.2.1'	'Secondary metabolism.phenolics.flavonoid synthesis and modification.chalcone synthase'	'Secondary metabolism.phenolics.flavonoid synthesis and modification.chalcone synthase (original description: none)'
Vitvi02g00298	3016.22	-1.81068	0.31904	-5.6754	1.38367e-08	6.43167e-06	3016.22	-2.84462	0.357607	-7.95459	1.79728e-15	1.84258e-13	3016.22	-1.96203	0.319191	-6.14689	7.90163e-10	2.19502e-08	3016.22	-2.87555	0.319758	-8.99288	2.40831e-19	3.85346e-17	VIT_02s0025g03300	AT5G41330.1	1e-163	575.1	1-to-many	AT5G41330.2	AT5G41330.1	BTB/POZ domain with WD40/YVTN repeat-like protein	NA	NA	NA	NA	BTB/POZ domain with WD40/YVTN repeat-like protein%3B FUNCTIONS IN: voltage-gated potassium channel activity%3B INVOLVED IN: potassium ion transport%3B LOCATED IN: voltage-gated potassium channel complex%2C membrane%3B EXPRESSED IN: 23 plant structures%3B EXPRESSED DURING: 13 growth stages%3B CONTAINS InterPro DOMAIN/s: WD40 repeat-like-containing domain (InterPro:IPR011046)%2C BTB/POZ fold (Inter…	*****	gene:2177860.UniProt:Q9FN67	NA	'35.1'	'not assigned.annotated'	'BTB/POZ domain-containing protein At5g41330 OS=Arabidopsis thaliana (sp|q9fn67|y5133_arath : 541.0)'
Vitvi08g01940	3126.52	-1.81275	0.33118	-5.47361	4.40969e-08	1.54473e-05	3126.52	-3.88526	0.372092	-10.4417	1.59968e-25	8.8417e-23	3126.52	-3.05085	0.330799	-9.22267	2.89791e-20	8.03307e-18	3126.52	-3.79002	0.332145	-11.4108	3.69494e-30	2.99711e-27	VIT_08s0007g08840	AT2G41640.3	9.4e-154	542.3	1-to-1	NA	AT2G41640.3	Glycosyltransferase family 61 protein	NA	NA	NA	NA	NA	NA	NA	NA	'35.2'	'not assigned.not annotated'	' no hits & (original description: none)'
Vitvi12g00445	7464.79	-1.82445	0.386656	-4.71852	2.37563e-06	0.000324415	7464.79	-2.89154	0.432629	-6.68365	2.33068e-11	1.13738e-09	7464.79	-1.52503	0.386811	-3.94258	8.06098e-05	0.000609179	7464.79	-2.44921	0.386827	-6.33153	2.42734e-10	7.54393e-09	VIT_12s0059g01380	AT1G05010.1	7.2e-118	422.2	1-to-1	NA	AT1G05010.1	ethylene-forming enzyme	Encodes 1-aminocyclopropane-1-carboxylate oxidase	"EFE"	ACO4.ethylene forming enzyme.EAT1	ethylene-forming enzyme	ethylene-forming enzyme (EFE)%3B FUNCTIONS IN: 1-aminocyclopropane-1-carboxylate oxidase activity%3B INVOLVED IN: response to fungus%2C ethylene biosynthetic process%3B EXPRESSED IN: 22 plant structures%3B EXPRESSED DURING: 13 growth stages%3B CONTAINS InterPro DOMAIN/s: Oxoglutarate/iron-dependent oxygenase (InterPro:IPR005123)%3B BEST Arabidopsis thaliana protein match is: 2-oxoglutarate (2OG) …	****	gene:2205567.UniProt:Q06588	"EFE"	'50.1.13'	'Enzyme classification.EC_1 oxidoreductases.EC_1.14 oxidoreductase acting on paired donor with incorporation or reduction of molecular oxygen'	'Enzyme classification.EC_1 oxidoreductases.EC_1.14 oxidoreductase acting on paired donor with incorporation or reduction of molecular oxygen(50.1.13 : 524.6) & 1-aminocyclopropane-1-carboxylate oxidase 3 OS=Petunia hybrida (sp|q08507|acco3_pethy : 426.0) (original description: none)'
Vitvi07g00301	2824.21	-1.82793	0.451575	-4.0479	5.16783e-05	0.00306156	2824.21	-1.79851	0.515216	-3.4908	0.000481575	0.0037732	2824.21	-2.42635	0.451194	-5.37762	7.54755e-08	1.3007e-06	2824.21	-2.38368	0.459775	-5.18444	2.16661e-07	3.53979e-06	VIT_07s0005g00170	AT3G05500.2	1.5e-33	142.1	1-to-1	NA	AT3G05500.2	Rubber elongation factor protein (REF)	NA	NA	NA	NA	NA	NA	NA	NA	'5.9.5'	'Lipid metabolism.lipid bodies-associated activities.LDAP protein'	'Lipid metabolism.lipid bodies-associated activities.LDAP protein (original description: none)'
Vitvi03g00473	2374.62	-1.83306	0.270644	-6.77295	1.26183e-11	3.38886e-08	2374.62	-2.62251	0.303886	-8.62993	6.13881e-18	1.00696e-15	2374.62	-2.51206	0.270297	-9.29374	1.48963e-20	4.5134e-18	2374.62	-2.88611	0.271392	-10.6345	2.05986e-26	8.10897e-24	VIT_03s0063g00880	AT2G15760.1	2.1e-54	211.5	1-to-1	NA	AT2G15760.1	calmodulin-binding protein (DUF1645)	NA	NA	NA	NA	Protein of unknown function (DUF1645)%3B FUNCTIONS IN: calmodulin binding%3B INVOLVED IN: biological_process unknown%3B LOCATED IN: plasma membrane%3B EXPRESSED IN: 19 plant structures%3B EXPRESSED DURING: 10 growth stages%3B CONTAINS InterPro DOMAIN/s: Protein of unknown function DUF1645 (InterPro:IPR012442)%3B BEST Arabidopsis thaliana protein match is: Protein of unknown function (DUF1645) (TA…	*****	PMID:11782485.PMID:17317660.gene:3695861.UniProt:Q9ZQD8	NA	'35.2'	'not assigned.not annotated'	' no hits & (original description: none)'
Vitvi16g01485	13715.2	-1.83745	0.419839	-4.37657	1.20562e-05	0.00112513	13715.2	-2.78904	0.469481	-5.94068	2.83842e-09	9.27593e-08	13715.2	-1.41684	0.419812	-3.37493	0.000738337	0.00400309	13715.2	-2.35471	0.419823	-5.60881	2.03723e-08	4.20913e-07	VIT_16s0100g00750	AT5G13930.1	2.6e-148	523.9	1-to-1	NA	AT5G13930.1	Chalcone and stilbene synthase family protein	Encodes chalcone synthase (CHS)%2C a key enzyme involved in the biosynthesis of flavonoids. Required for the accumulation of purple anthocyanins in leaves and stems. Also involved in the regulation of auxin transport and the modulation of root gravitropism.	"TT4"	ATCHS.CHS.CHALCONE SYNTHASE	TRANSPARENT TESTA 4	TRANSPARENT TESTA 4 (TT4)%3B FUNCTIONS IN: naringenin-chalcone synthase activity%3B INVOLVED IN: in 11 processes%3B LOCATED IN: plant-type vacuole membrane%2C endoplasmic reticulum%2C nucleus%3B EXPRESSED IN: 22 plant structures%3B EXPRESSED DURING: 14 growth stages%3B CONTAINS InterPro DOMAIN/s: Chalcone/stilbene synthase%2C N-terminal (InterPro:IPR001099)%2C Thiolase-like (InterPro:IPR016039)%2…	****	PMID:10987549.PMID:10677434.PMID:10631255.PMID:10536025.PMID:9794081.PMID:9501110.PMID:8672888.PMID:8685272.PMID:8528278.PMID:8528277.PMID:2780550.PMID:3386631.PMID:11080303.PMID:11139518.PMID:11136235.PMID:11402184.PMID:12271060.PMID:12212845.PMID:1840523.PMID:14617075.PMID:14966245.PMID:15100399.PMID:15053760.PMID:15208397.PMID:15185374.PMID:15347797.PMID:15705950.PMID:15705952.PMID:15781573.PM…	"VviSTS7"	'9.2.2.1'	'Secondary metabolism.phenolics.flavonoid synthesis and modification.chalcone synthase'	'Secondary metabolism.phenolics.flavonoid synthesis and modification.chalcone synthase (original description: none)'
Vitvi08g00793	4626.32	-1.85603	0.304902	-6.08731	1.1482e-09	8.41005e-07	4626.32	-3.14253	0.341633	-9.19855	3.62826e-20	8.70269e-18	4626.32	-2.20401	0.305011	-7.22599	4.97476e-13	2.64842e-11	4626.32	-3.03304	0.305508	-9.92785	3.14967e-23	8.13697e-21	VIT_08s0058g00690	AT2G38470.1	1.7e-47	189.5	1-to-1	NA	AT2G38470.1	WRKY DNA-binding protein 33	Member of the plant WRKY transcription factor family. Regulates the antagonistic relationship between defense pathways mediating responses to P. syringae and necrotrophic fungal pathogens. Located in nucleus. Involved in response to various abiotic stresses - especially salt stress.	"WRKY33"	ATWRKY33.WRKY DNA-BINDING PROTEIN 33	WRKY DNA-binding protein 33	WRKY DNA-binding protein 33 (WRKY33)%3B CONTAINS InterPro DOMAIN/s: DNA-binding WRKY (InterPro:IPR003657)%3B BEST Arabidopsis thaliana protein match is: WRKY DNA-binding protein 4 (TAIR:AT1G13960.1)%3B Has 7573 Blast hits to 4449 proteins in 326 species: Archae - 2%3B Bacteria - 120%3B Metazoa - 293%3B Fungi - 170%3B Plants - 5689%3B Viruses - 9%3B Other Eukaryotes - 1290 (source: NCBI BLink).	****	PMID:11118137.PMID:17427812.PMID:17722694.gene:2057211.UniProt:Q8S8P5	"WRKY33"	'15.7.22'	'RNA biosynthesis.transcriptional activation.WRKY transcription factor'	'RNA biosynthesis.transcriptional activation.WRKY transcription factor (original description: none)'
Vitvi09g01975	113.879	-1.85773	0.475304	-3.90852	9.28631e-05	0.00474544	113.879	-3.47187	0.567013	-6.12309	9.17772e-10	3.32556e-08	113.879	-2.7055	0.476202	-5.68141	1.33592e-08	2.76757e-07	113.879	-4.61167	0.500039	-9.22261	2.89962e-20	5.17363e-18		NA	NA	NA	NA	NA	NA	NA	NA	NA	NA	NA	NA	NA	NA	NA	'35.2'	'not assigned.not annotated'	' no hits & (original description: none)'
Vitvi01g00697	6643.95	-1.86714	0.416041	-4.48788	7.19365e-06	0.00077972	6643.95	-3.49133	0.464977	-7.50861	5.97598e-14	4.67506e-12	6643.95	-3.35009	0.416225	-8.04875	8.36459e-16	7.84015e-14	6643.95	-3.14042	0.415668	-7.5551	4.18546e-14	2.7245e-12	VIT_01s0127g00250	AT1G23390.1	5e-81	299.7	1-to-1	NA	AT1G23390.1	Kelch repeat-containing F-box family protein	NA	NA	NA	NA	Kelch repeat-containing F-box family protein%3B CONTAINS InterPro DOMAIN/s: F-box domain%2C cyclin-like (InterPro:IPR001810)%2C F-box domain%2C Skp2-like (InterPro:IPR022364)%2C Galactose oxidase/kelch%2C beta-propeller (InterPro:IPR011043)%2C Kelch-type beta propeller (InterPro:IPR015915)%3B BEST Arabidopsis thaliana protein match is: Galactose oxidase/kelch repeat superfamily protein (TAIR:AT3G…	*****	gene:3433758.UniProt:Q9LDE3	NA	'19.4.1.5.4.1.4.6'	'Protein degradation.peptide tagging.Ubiquitin (UBQ)-anchor addition (ubiquitylation).UBQ-ligase E3 activities.Cullin-based ubiquitylation complexes.SKP1-CUL1-FBX (SCF) E3 ligase complexes.F-BOX substrate adaptor components.FBX component'	'Protein degradation.peptide tagging.Ubiquitin (UBQ)-anchor addition (ubiquitylation).UBQ-ligase E3 activities.Cullin-based ubiquitylation complexes.SKP1-CUL1-FBX (SCF) E3 ligase complexes.F-BOX substrate adaptor components.FBX component (original description: none)'
Vitvi04g01985	32.1037	-1.87049	0.490903	-3.81029	0.000138802	0.00636617	32.1037	-4.43488	0.757892	-5.8516	4.86875e-09	1.51515e-07	32.1037	-2.82262	0.752081	-3.75307	0.00017468	0.00118071	32.1037	-3.40823	0.602566	-5.6562	1.54765e-08	3.27503e-07	VIT_04s0069g00980	AT5G64810.1	5.1e-13	74.3	1-to-1	NA	AT5G64810.1	WRKY DNA-binding protein 51	member of WRKY Transcription Factor%3B Group II-c. Involved in jasmonic acid inducible defense responses.	"WRKY51"	ATWRKY51.ARABIDOPSIS THALIANA WRKY DNA-BINDING PROTEIN 51	WRKY DNA-binding protein 51	WRKY DNA-binding protein 51 (WRKY51)%3B CONTAINS InterPro DOMAIN/s: DNA-binding WRKY (InterPro:IPR003657)%3B BEST Arabidopsis thaliana protein match is: WRKY DNA-binding protein 50 (TAIR:AT5G26170.1)%3B Has 30201 Blast hits to 17322 proteins in 780 species: Archae - 12%3B Bacteria - 1396%3B Metazoa - 17338%3B Fungi - 3422%3B Plants - 5037%3B Viruses - 0%3B Other Eukaryotes - 2996 (source: NCBI BL…	****	PMID:11118137.gene:2177638.UniProt:Q93WU9	"WRKY51"	'15.7.22'	'RNA biosynthesis.transcriptional activation.WRKY transcription factor'	'RNA biosynthesis.transcriptional activation.WRKY transcription factor (original description: none)'
Vitvi05g01761	262.253	-1.87977	0.435517	-4.31619	1.58746e-05	0.00135107	262.253	-3.02002	0.492025	-6.13795	8.35946e-10	3.05812e-08	262.253	-2.1856	0.440227	-4.96471	6.88028e-07	9.42088e-06	262.253	-3.05208	0.430351	-7.09208	1.3211e-12	6.55293e-11	VIT_05s0077g01520	NA	NA	NA	NA	NA	NA	NA	NA	NA	NA	NA	NA	NA	NA	NA	'35.1'	'not assigned.annotated'	'Pathogenesis-related protein STH-21 OS=Solanum tuberosum (sp|p17641|prs1_soltu : 159.0)'
Vitvi16g01213	402.009	-1.88064	0.38346	-4.90439	9.37183e-07	0.000161805	402.009	-3.14709	0.430862	-7.30418	2.7897e-13	1.9274e-11	402.009	-2.43012	0.382416	-6.35466	2.08889e-10	6.47209e-09	402.009	-3.00508	0.385088	-7.80361	6.01612e-15	4.66268e-13	VIT_16s0050g02510	AT4G23810.1	1.5e-17	90.1	1-to-1	NA	AT4G23810.1	WRKY family transcription factor	member of WRKY Transcription Factor%3B Group III	"WRKY53"	NA	NA	WRKY53%3B FUNCTIONS IN: protein binding%2C DNA binding%2C transcription activator activity%2C sequence-specific DNA binding transcription factor activity%3B INVOLVED IN: in 6 processes%3B LOCATED IN: nucleus%2C chloroplast%3B EXPRESSED IN: 20 plant structures%3B EXPRESSED DURING: 12 growth stages%3B CONTAINS InterPro DOMAIN/s: DNA-binding WRKY (InterPro:IPR003657)%3B BEST Arabidopsis thaliana pro…	****	PMID:11118137.PMID:17096590.PMID:17722694.PMID:17977154.PMID:18183400.PMID:18431481.gene:3439784.UniProt:Q9SUP6	"WRKY53"	'15.7.22'	'RNA biosynthesis.transcriptional activation.WRKY transcription factor'	'RNA biosynthesis.transcriptional activation.WRKY transcription factor (original description: none)'
Vitvi11g00924	24443	-1.88179	0.410347	-4.58584	4.52161e-06	0.000543741	24443	-3.07782	0.458855	-6.70759	1.97862e-11	9.82549e-10	24443	-2.42557	0.410329	-5.91127	3.39489e-09	8.10079e-08	24443	-2.72244	0.410367	-6.63416	3.26362e-11	1.21863e-09	VIT_11s0065g00350	AT2G30490.1	7.3e-93	339.7	1-to-1	NA	AT2G30490.1	cinnamate-4-hydroxylase	Encodes a cinnamate-4-hydroxylase. Mutations in this gene impact phenylpropanoid metabolism%2C growth and development.	"C4H"	ATC4H.CINNAMATE 4-HYDROXYLASE.CYP73A5.REF3.REDUCED EPRDERMAL FLUORESCENCE 3	cinnamate-4-hydroxylase	cinnamate-4-hydroxylase (C4H)%3B FUNCTIONS IN: trans-cinnamate 4-monooxygenase activity%3B INVOLVED IN: in 9 processes%3B LOCATED IN: endoplasmic reticulum%2C plasma membrane%2C membrane%2C plant-type cell wall%3B EXPRESSED IN: 25 plant structures%3B EXPRESSED DURING: 14 growth stages%3B CONTAINS InterPro DOMAIN/s: Cytochrome P450 (InterPro:IPR001128)%2C Cytochrome P450%2C E-class%2C group I (Int…	****	PMID:10535921.PMID:9618461.PMID:9449848.PMID:9235908.PMID:9085571.PMID:9085570.PMID:8692910.PMID:15932991.PMID:16287169.PMID:16618929.PMID:17151019.PMID:17317660.PMID:17394776.PMID:17432890.PMID:17644812.gene:2064401.UniProt:P92994	"C4H"	'50.1.13'	'Enzyme classification.EC_1 oxidoreductases.EC_1.14 oxidoreductase acting on paired donor with incorporation or reduction of molecular oxygen'	'Cytochrome P450 CYP73A100 OS=Panax ginseng (sp|h2dh22|c7a10_pangi : 446.0) & Enzyme classification.EC_1 oxidoreductases.EC_1.14 oxidoreductase acting on paired donor with incorporation or reduction of molecular oxygen(50.1.13 : 387.8) (original description: none)'
Vitvi14g01522	12685.7	-1.88986	0.457542	-4.13048	3.62014e-05	0.00233964	12685.7	-3.68977	0.51161	-7.21207	5.51072e-13	3.57423e-11	12685.7	-4.85959	0.458004	-10.6104	2.66713e-26	2.39646e-23	12685.7	-3.75999	0.457583	-8.21708	2.08513e-16	2.09365e-14	VIT_14s0068g01760	AT3G01980.1	2.7e-32	139.4	1-to-many	AT3G01980.3.AT3G01980.4.AT3G01980.5	AT3G01980.1	NAD(P)-binding Rossmann-fold superfamily protein	NA	NA	NA	NA	NAD(P)-binding Rossmann-fold superfamily protein%3B FUNCTIONS IN: oxidoreductase activity%2C binding%2C catalytic activity%3B INVOLVED IN: metabolic process%3B LOCATED IN: peroxisome%3B EXPRESSED IN: 23 plant structures%3B EXPRESSED DURING: 13 growth stages%3B CONTAINS InterPro DOMAIN/s: NAD(P)-binding domain (InterPro:IPR016040)%2C Short-chain dehydrogenase/reductase SDR (InterPro:IPR002198)%3B …	****	PMID:17951448.gene:3699369.UniProt:Q9SG99	NA	'35.2'	'not assigned.not annotated'	' no hits & (original description: none)'
Vitvi04g00511	1770.82	-1.8952	0.321694	-5.89132	3.83129e-09	2.37452e-06	1770.82	-3.78383	0.360329	-10.501	8.54395e-26	5.17214e-23	1770.82	-2.51492	0.322174	-7.80608	5.89923e-15	4.65807e-13	1770.82	-3.13171	0.321662	-9.73603	2.11653e-22	5.09632e-20	VIT_04s0008g05760	AT1G80840.1	5.4e-28	124.4	1-to-1	NA	AT1G80840.1	WRKY DNA-binding protein 40	Pathogen-induced transcription factor. Binds W-box sequences in vitro. Forms protein complexes with itself and with WRKY40 and WRKY60. Coexpression with WRKY18 or WRKY60 made plants more susceptible to both P. syringae and B. cinerea. WRKY18%2C WRKY40%2C and WRKY60 have partially redundant roles in response to the hemibiotrophic bacterial pathogen Pseudomonas syringae and the necrotrophic fungal …	"WRKY40"	ATWRKY40	WRKY DNA-binding protein 40	WRKY DNA-binding protein 40 (WRKY40)%3B CONTAINS InterPro DOMAIN/s: DNA-binding WRKY (InterPro:IPR003657)%3B BEST Arabidopsis thaliana protein match is: WRKY DNA-binding protein 18 (TAIR:AT4G31800.2)%3B Has 3306 Blast hits to 2859 proteins in 187 species: Archae - 0%3B Bacteria - 0%3B Metazoa - 0%3B Fungi - 0%3B Plants - 3292%3B Viruses - 0%3B Other Eukaryotes - 14 (source: NCBI BLink).	****	PMID:11118137.PMID:16603654.PMID:17185563.PMID:17722694.PMID:18922600.gene:2025686.UniProt:Q9SAH7	"WRKY40"	'15.7.22'	'RNA biosynthesis.transcriptional activation.WRKY transcription factor'	'RNA biosynthesis.transcriptional activation.WRKY transcription factor (original description: none)'
Vitvi07g01784	1265.55	-1.90092	0.443787	-4.2834	1.84059e-05	0.00147804	1265.55	-3.61052	0.503403	-7.17223	7.3787e-13	4.64365e-11	1265.55	-2.45468	0.444352	-5.52418	3.31024e-08	6.18315e-07	1265.55	-4.21051	0.448949	-9.37858	6.68685e-21	1.28559e-18	VIT_07s0031g01070	AT4G39830.1	7.8e-130	464.2	1-to-many	AT4G39830.2.AT4G39830.3.AT4G39830.4	AT4G39830.1	Cupredoxin superfamily protein	NA	NA	NA	NA	Cupredoxin superfamily protein%3B FUNCTIONS IN: oxidoreductase activity%2C L-ascorbate oxidase activity%2C copper ion binding%3B INVOLVED IN: oxidation reduction%3B LOCATED IN: endomembrane system%2C extracellular region%3B EXPRESSED IN: 19 plant structures%3B EXPRESSED DURING: 12 growth stages%3B CONTAINS InterPro DOMAIN/s: Multicopper oxidase%2C type 3 (InterPro:IPR011707)%2C Multicopper oxidas…	****	PMID:2919172.gene:3439960.UniProt:O65670	NA	'50.1.10'	'Enzyme classification.EC_1 oxidoreductases.EC_1.10 oxidoreductase acting on diphenol or related substance as donor'	'Enzyme classification.EC_1 oxidoreductases.EC_1.10 oxidoreductase acting on diphenol or related substance as donor(50.1.10 : 405.3) & L-ascorbate oxidase OS=Nicotiana tabacum (sp|q40588|aso_tobac : 309.0) (original description: none)'
Vitvi16g01501	1933.63	-1.90625	0.473471	-4.02613	5.67027e-05	0.00329509	1933.63	-5.27234	0.535544	-9.84483	7.21579e-23	2.47921e-20	1933.63	-1.87979	0.475561	-3.95279	7.72466e-05	0.000587855	1933.63	-4.05308	0.472889	-8.57089	1.02688e-17	1.25523e-15	VIT_16s0039g01070	AT2G29420.1	5.5e-36	150.6	1-to-1	NA	AT2G29420.1	glutathione S-transferase tau 7	Encodes glutathione transferase belonging to the tau class of GSTs. Naming convention according to Wagner et al. (2002). Induced by Salicylic acid. Independent of NPR1 for their induction by salicylic acid.	"GSTU7"	ATGSTU7.glutathione S-transferase tau 7.GST25.GLUTATHIONE S-TRANSFERASE 25	glutathione S-transferase tau 7	glutathione S-transferase tau 7 (GSTU7)%3B CONTAINS InterPro DOMAIN/s: Thioredoxin fold (InterPro:IPR012335)%2C Glutathione S-transferase%2C C-terminal (InterPro:IPR004046)%2C Glutathione S-transferase%2C C-terminal-like (InterPro:IPR010987)%2C Glutathione S-transferase/chloride channel%2C C-terminal (InterPro:IPR017933)%2C Glutathione S-transferase%2C N-terminal (InterPro:IPR004045)%2C Thioredox…	*****	PMID:18334669.gene:2043111.UniProt:Q9ZW24	NA	'18.12.1.4'	'Protein modification.S-glutathionylation and deglutathionylation.glutathione S-transferase activities.class tau'	'Protein modification.S-glutathionylation and deglutathionylation.glutathione S-transferase activities.class tau (original description: none)'
Vitvi07g00146	10655.9	-1.9082	0.399924	-4.7714	1.82947e-06	0.000271289	10655.9	-2.94828	0.447776	-6.58427	4.57141e-11	2.12095e-09	10655.9	-3.24936	0.399972	-8.12396	4.51232e-16	4.53967e-14	10655.9	-3.20782	0.400335	-8.01285	1.12076e-15	1.0071e-13	VIT_07s0104g00180	AT1G03220.1	9.3e-152	535	1-to-1	NA	AT1G03220.1	Eukaryotic aspartyl protease family protein	NA	NA	NA	NA	Eukaryotic aspartyl protease family protein%3B FUNCTIONS IN: aspartic-type endopeptidase activity%3B INVOLVED IN: response to salt stress%3B LOCATED IN: cell wall%2C plasma membrane%2C membrane%2C plant-type cell wall%3B EXPRESSED IN: 6 plant structures%3B CONTAINS InterPro DOMAIN/s: Peptidase aspartic (InterPro:IPR021109)%2C Peptidase aspartic%2C catalytic (InterPro:IPR009007)%2C Peptidase A1 (I…	*****	PMID:11351099.PMID:14595688.PMID:15593128.PMID:16618929.PMID:17432890.PMID:17526915.PMID:17916636.PMID:21166475.gene:2014474.UniProt:Q9ZVS4	NA	'19.5.3.1'	'Protein degradation.peptidase families.aspartic-type peptidase activities.pepsin-type protease'	'Protein degradation.peptidase families.aspartic-type peptidase activities.pepsin-type protease (original description: none)'
Vitvi19g02230	5632.92	-1.90846	0.399263	-4.77995	1.75336e-06	0.000263233	5632.92	-4.53326	0.447535	-10.1294	4.09125e-24	1.82491e-21	5632.92	-4.23277	0.399661	-10.5909	3.28428e-26	2.85262e-23	5632.92	-3.6403	0.399694	-9.1077	8.41489e-20	1.41012e-17	VIT_19s0140g00120	AT1G78440.1	3.5e-68	257.7	1-to-1	NA	AT1G78440.1	gibberellin 2-beta-dioxygenase	Encodes a gibberellin 2-oxidase that acts on C19 gibberellins.	"ATGA2OX1"	GA2OX1.gibberellin 2-oxidase 1	Arabidopsis thaliana gibberellin 2-oxidase 1	Arabidopsis thaliana gibberellin 2-oxidase 1 (ATGA2OX1)%3B CONTAINS InterPro DOMAIN/s: Isopenicillin N synthase (InterPro:IPR002283)%2C Oxoglutarate/iron-dependent oxygenase (InterPro:IPR005123)%3B BEST Arabidopsis thaliana protein match is: gibberellin 2-oxidase (TAIR:AT1G30040.1)%3B Has 8410 Blast hits to 8364 proteins in 975 species: Archae - 0%3B Bacteria - 1063%3B Metazoa - 88%3B Fungi - 964…	*****	PMID:10200325.PMID:16139211.PMID:16270204.PMID:17521606.gene:2032079.UniProt:Q8LEA2	NA	'11.6.3.3'	'Phytohormones.gibberellin.conjugation and degradation.gibberellin 2-oxidase'	'Phytohormones.gibberellin.conjugation and degradation.gibberellin 2-oxidase (original description: none)'
Vitvi16g01479	7136.73	-1.91442	0.447034	-4.2825	1.84803e-05	0.0014791	7136.73	-2.91401	0.49945	-5.83444	5.39703e-09	1.66236e-07	7136.73	-1.60359	0.446934	-3.58798	0.000333245	0.00204202	7136.73	-2.79174	0.446551	-6.25177	4.05823e-10	1.21117e-08	VIT_16s0100g01140	AT5G13930.1	7.6e-148	522.3	1-to-1	NA	AT5G13930.1	Chalcone and stilbene synthase family protein	Encodes chalcone synthase (CHS)%2C a key enzyme involved in the biosynthesis of flavonoids. Required for the accumulation of purple anthocyanins in leaves and stems. Also involved in the regulation of auxin transport and the modulation of root gravitropism.	"TT4"	ATCHS.CHS.CHALCONE SYNTHASE	TRANSPARENT TESTA 4	TRANSPARENT TESTA 4 (TT4)%3B FUNCTIONS IN: naringenin-chalcone synthase activity%3B INVOLVED IN: in 11 processes%3B LOCATED IN: plant-type vacuole membrane%2C endoplasmic reticulum%2C nucleus%3B EXPRESSED IN: 22 plant structures%3B EXPRESSED DURING: 14 growth stages%3B CONTAINS InterPro DOMAIN/s: Chalcone/stilbene synthase%2C N-terminal (InterPro:IPR001099)%2C Thiolase-like (InterPro:IPR016039)%2…	****	PMID:10987549.PMID:10677434.PMID:10631255.PMID:10536025.PMID:9794081.PMID:9501110.PMID:8672888.PMID:8685272.PMID:8528278.PMID:8528277.PMID:2780550.PMID:3386631.PMID:11080303.PMID:11139518.PMID:11136235.PMID:11402184.PMID:12271060.PMID:12212845.PMID:1840523.PMID:14617075.PMID:14966245.PMID:15100399.PMID:15053760.PMID:15208397.PMID:15185374.PMID:15347797.PMID:15705950.PMID:15705952.PMID:15781573.PM…	"VviSTS42"	'9.2.2.1'	'Secondary metabolism.phenolics.flavonoid synthesis and modification.chalcone synthase'	'Secondary metabolism.phenolics.flavonoid synthesis and modification.chalcone synthase (original description: none)'
Vitvi14g01757	12781.8	-1.91557	0.297084	-6.44791	1.13404e-10	1.61241e-07	12781.8	-3.57006	0.332432	-10.7392	6.66172e-27	4.57768e-24	12781.8	-2.4286	0.297139	-8.17326	3.00174e-16	3.19251e-14	12781.8	-3.28928	0.297154	-11.0693	1.76792e-28	1.04396e-25	VIT_14s0066g01150	AT5G14700.2	6.2e-19	94.7	1-to-1	NA	AT5G14700.2	NAD(P)-binding Rossmann-fold superfamily protein	NA	NA	NA	NA	NA	NA	NA	4CL	'35.1'	'not assigned.annotated'	Cinnamoyl-CoA reductase-like SNL6 OS=Oryza sativa subsp. japonica (sp|q0jkz0|snl6_orysj : 84.3)'
Vitvi05g01759	5254.69	-1.92209	0.366995	-5.23737	1.62882e-07	4.23336e-05	5254.69	-3.32484	0.411299	-8.08375	6.28067e-16	7.2218e-14	5254.69	-2.50617	0.367059	-6.82771	8.62803e-12	3.63788e-10	5254.69	-2.90598	0.367518	-7.90706	2.63548e-15	2.21568e-13	VIT_05s0077g01550	AT1G24020.1	4.2e-06	50.4	1-to-many	AT1G24020.2	AT1G24020.1	MLP-like protein 423	NA	"MLP423"	NA	MLP-like protein 423	MLP-like protein 423 (MLP423)%3B INVOLVED IN: response to biotic stimulus%2C defense response%3B LOCATED IN: membrane%3B EXPRESSED IN: 23 plant structures%3B EXPRESSED DURING: 15 growth stages%3B CONTAINS InterPro DOMAIN/s: Bet v I allergen (InterPro:IPR000916)%3B BEST Arabidopsis thaliana protein match is: MLP-like protein 28 (TAIR:AT1G70830.3)%3B Has 1440 Blast hits to 1404 proteins in 125 spec…	****	PMID:9332353.PMID:17432890.gene:2199931.UniProt:Q93VR4	NA	'35.1'	'not assigned.annotated'	'Major allergen Pru ar 1 OS=Prunus armeniaca (sp|o50001|pru1_pruar : 123.0)'
Vitvi19g00181	515.867	-1.92495	0.355888	-5.40888	6.34196e-08	2.01699e-05	515.867	-2.80045	0.407756	-6.86794	6.5134e-12	3.47177e-10	515.867	-2.54994	0.363264	-7.01953	2.22615e-12	1.03583e-10	515.867	-3.58237	0.35756	-10.0189	1.25836e-23	3.50658e-21	VIT_19s0014g02120	AT2G31090.1	1e-08	59.3	1-to-1	NA	AT2G31090.1	transmembrane protein	NA	NA	NA	NA	unknown protein%3B FUNCTIONS IN: molecular_function unknown%3B INVOLVED IN: biological_process unknown%3B LOCATED IN: endomembrane system%3B EXPRESSED IN: 24 plant structures%3B EXPRESSED DURING: 13 growth stages%3B BEST Arabidopsis thaliana protein match is: unknown protein (TAIR:AT2G20562.1)%3B Has 70 Blast hits to 70 proteins in 13 species: Archae - 0%3B Bacteria - 0%3B Metazoa - 0%3B Fungi - …	*****	gene:2055891.UniProt:O82275	NA	'35.2'	'not assigned.not annotated'	' no hits & (original description: none)'
Vitvi10g01778	6381.26	-1.93071	0.342483	-5.6374	1.72639e-08	7.58703e-06	6381.26	-4.42382	0.385645	-11.4712	1.84052e-30	2.9247e-27	6381.26	-2.97698	0.342727	-8.68617	3.74874e-18	6.18842e-16	6381.26	-4.01816	0.343572	-11.6953	1.34765e-31	1.33692e-28	VIT_10s0003g00470	AT4G35160.1	3.6e-44	177.6	1-to-1	NA	AT4G35160.1	O-methyltransferase family protein	NA	NA	NA	NA	O-methyltransferase family protein%3B FUNCTIONS IN: methyltransferase activity%2C O-methyltransferase activity%2C protein dimerization activity%3B LOCATED IN: cytosol%3B CONTAINS InterPro DOMAIN/s: Winged helix-turn-helix transcription repressor DNA-binding (InterPro:IPR011991)%2C Plant methyltransferase dimerisation (InterPro:IPR012967)%2C O-methyltransferase%2C family 2 (InterPro:IPR001077)%2C …	****	PMID:9144260.PMID:9484457.gene:2132805.UniProt:Q9T003	NA	'50.2.1'	'Enzyme classification.EC_2 transferases.EC_2.1 transferase transferring one-carbon group'	'Trans-resveratrol di-O-methyltransferase OS=Vitis vinifera (sp|b6vjs4|romt_vitvi : 274.0) & Enzyme classification.EC_2 transferases.EC_2.1 transferase transferring one-carbon group(50.2.1 : 111.8) (original description: none)'
Vitvi07g01791	2302.6	-1.93164	0.413529	-4.67112	2.99566e-06	0.000383112	2302.6	-3.88626	0.46453	-8.36601	5.96026e-17	8.56156e-15	2302.6	-2.45882	0.41409	-5.93788	2.88726e-09	6.99194e-08	2302.6	-4.37834	0.415525	-10.5369	5.83968e-26	2.22815e-23	VIT_07s0031g01130	AT4G39830.1	7.1e-132	470.7	1-to-many	AT4G39830.2.AT4G39830.3.AT4G39830.4	AT4G39830.1	Cupredoxin superfamily protein	NA	NA	NA	NA	Cupredoxin superfamily protein%3B FUNCTIONS IN: oxidoreductase activity%2C L-ascorbate oxidase activity%2C copper ion binding%3B INVOLVED IN: oxidation reduction%3B LOCATED IN: endomembrane system%2C extracellular region%3B EXPRESSED IN: 19 plant structures%3B EXPRESSED DURING: 12 growth stages%3B CONTAINS InterPro DOMAIN/s: Multicopper oxidase%2C type 3 (InterPro:IPR011707)%2C Multicopper oxidas…	****	PMID:2919172.gene:3439960.UniProt:O65670	NA	'50.1.10'	'Enzyme classification.EC_1 oxidoreductases.EC_1.10 oxidoreductase acting on diphenol or related substance as donor'	'Enzyme classification.EC_1 oxidoreductases.EC_1.10 oxidoreductase acting on diphenol or related substance as donor(50.1.10 : 468.9) & L-ascorbate oxidase OS=Nicotiana tabacum (sp|q40588|aso_tobac : 318.0) (original description: none)'
Vitvi01g00246	96.2849	-1.96453	0.489936	-4.00976	6.07812e-05	0.00350542	96.2849	-3.45958	0.552314	-6.26378	3.75753e-10	1.49741e-08	96.2849	-4.44968	0.514909	-8.64169	5.53899e-18	8.59104e-16	96.2849	-2.47315	0.46966	-5.26584	1.3955e-07	2.38126e-06	VIT_01s0011g03090	AT1G13280.1	4.5e-68	257.3	1-to-1	NA	AT1G13280.1	allene oxide cyclase 4	Encodes allene oxide cyclase. One of four genes in Arabidopsis that encode this enzyme%2C which catalyzes an essential step in jasmonic acid biosynthesis. Gene expression is reduced during senescence%2C a process that involves jasmonic acid signalling pathway.	"AOC4"	NA	allene oxide cyclase 4	allene oxide cyclase 4 (AOC4)%3B FUNCTIONS IN: allene-oxide cyclase activity%3B INVOLVED IN: jasmonic acid biosynthetic process%3B LOCATED IN: plasma membrane%2C chloroplast%3B EXPRESSED IN: 24 plant structures%3B EXPRESSED DURING: 13 growth stages%3B CONTAINS InterPro DOMAIN/s: Allene oxide cyclase (InterPro:IPR009410)%3B BEST Arabidopsis thaliana protein match is: allene oxide cyclase 3 (TAIR:A…	****	PMID:8075396.PMID:10764787.PMID:16618929.PMID:18431481.gene:2205348.UniProt:Q93ZC5	NA	'11.7.1.4'	'Phytohormones.jasmonic acid.synthesis.allene oxidase cyclase (AOC)'	'Phytohormones.jasmonic acid.synthesis.allene oxidase cyclase (AOC) (original description: none)'
Vitvi19g01897	103.376	-1.97057	0.341124	-5.77669	7.61839e-09	4.00313e-06	103.376	-3.1255	0.430393	-7.26195	3.81535e-13	2.55951e-11	103.376	-2.48021	0.35099	-7.06633	1.59085e-12	7.57819e-11	103.376	-3.414	0.399114	-8.55393	1.18968e-17	1.43928e-15	VIT_19s0014g03310	AT3G15518.1	9.9e-09	58.5	1-to-1	NA	AT3G15518.1	hypothetical protein	NA	NA	NA	NA	unknown protein%3B FUNCTIONS IN: molecular_function unknown%3B INVOLVED IN: biological_process unknown%3B LOCATED IN: cellular_component unknown%3B Has 30201 Blast hits to 17322 proteins in 780 species: Archae - 12%3B Bacteria - 1396%3B Metazoa - 17338%3B Fungi - 3422%3B Plants - 5037%3B Viruses - 0%3B Other Eukaryotes - 2996 (source: NCBI BLink).	*****	gene:4515101436.UniProt:Q8GYA5	NA	'35.2'	'not assigned.not annotated'	' no hits & (original description: none)'
Vitvi16g00060	12402.7	-1.97149	0.535747	-3.67988	0.000233341	0.00962472	12402.7	-3.68383	0.598751	-6.15253	7.62545e-10	2.83032e-08	12402.7	-1.74317	0.535691	-3.25406	0.00113768	0.00576068	12402.7	-3.5973	0.535488	-6.7178	1.84487e-11	7.29739e-10	VIT_16s0039g01240	AT2G37040.1	0	1156.4	1-to-1	NA	AT2G37040.1	PHE ammonia lyase 1	Encodes PAL1%2C a phenylalanine ammonia-lyase. Arabidopsis has four PALs: AT2G37040 (PAL1)%2C AT3G53260 (PAL2)%2C AT5G04230 (PAL3) and AT3G10340 (PAL4).	"PAL1"	ATPAL1	PHE ammonia lyase 1	PHE ammonia lyase 1 (PAL1)%3B FUNCTIONS IN: phenylalanine ammonia-lyase activity%3B INVOLVED IN: in 10 processes%3B LOCATED IN: cytoplasm%3B EXPRESSED IN: 22 plant structures%3B EXPRESSED DURING: 13 growth stages%3B CONTAINS InterPro DOMAIN/s: Phenylalanine/histidine ammonia-lyase (InterPro:IPR001106)%2C Phenylalanine/histidine ammonia-lyases%2C active site (InterPro:IPR022313)%2C L-Aspartase-lik…	****	PMID:7888622.PMID:15634198.PMID:16299170.PMID:17158583.PMID:18251883.PMID:18242769.gene:2057980.UniProt:P35510	"PAL1"	'9.2.1.1'	'Secondary metabolism.phenolics.p-coumaroyl-CoA synthesis.phenylalanine ammonia lyase (PAL)'	'Secondary metabolism.phenolics.p-coumaroyl-CoA synthesis.phenylalanine ammonia lyase (PAL) (original description: none)'
Vitvi03g00213	12785.8	-1.97206	0.368298	-5.35452	8.57838e-08	2.52863e-05	12785.8	-2.59098	0.412035	-6.28825	3.21075e-10	1.29371e-08	12785.8	-1.87263	0.368293	-5.08462	3.68372e-07	5.37139e-06	12785.8	-2.54404	0.36844	-6.9049	5.0238e-12	2.20914e-10	VIT_03s0038g03530	AT1G47670.1	5.9e-51	201.4	1-to-1	NA	AT1G47670.1	Transmembrane amino acid transporter family protein	NA	NA	NA	NA	Transmembrane amino acid transporter family protein%3B FUNCTIONS IN: amino acid transmembrane transporter activity%3B INVOLVED IN: amino acid transport%3B LOCATED IN: plasma membrane%2C membrane%3B EXPRESSED IN: 20 plant structures%3B EXPRESSED DURING: 13 growth stages%3B CONTAINS InterPro DOMAIN/s: Amino acid transporter%2C transmembrane (InterPro:IPR013057)%3B BEST Arabidopsis thaliana protein …	****	PMID:14506206.PMID:17317660.gene:2015382.UniProt:Q9SX98	NA	'35.1'	'not assigned.annotated'	'Lysine histidine transporter-like 8 OS=Arabidopsis thaliana (sp|q9sx98|lhtl8_arath : 173.0)'
Vitvi01g00317	408.853	-1.988	0.409036	-4.8602	1.17267e-06	0.00019282	408.853	-3.18448	0.472958	-6.7331	1.66087e-11	8.31254e-10	408.853	-3.77497	0.409638	-9.21538	3.10184e-20	8.50786e-18	408.853	-2.87892	0.417877	-6.88939	5.60311e-12	2.45084e-10	VIT_01s0011g03850	AT1G68390.1	1.3e-76	286.2	1-to-1	NA	AT1G68390.1	Core-2/I-branching beta-1%2C6-N-acetylglucosaminyltransferase family protein	NA	NA	NA	NA	Core-2/I-branching beta-1%2C6-N-acetylglucosaminyltransferase family protein%3B CONTAINS InterPro DOMAIN/s: Core-2/I-Branching enzyme (InterPro:IPR021141)%3B BEST Arabidopsis thaliana protein match is: Core-2/I-branching beta-1%2C6-N-acetylglucosaminyltransferase family protein (TAIR:AT1G68380.1)%3B Has 622 Blast hits to 618 proteins in 34 species: Archae - 0%3B Bacteria - 10%3B Metazoa - 12%3B F…	****	gene:2202323.UniProt:Q9M9C4	NA	'35.2'	'not assigned.not annotated'	' no hits & (original description: none)'
Vitvi16g00993	7960.14	-1.99052	0.423634	-4.69866	2.61871e-06	0.000348984	7960.14	-2.40484	0.474189	-5.07147	3.94751e-07	8.09399e-06	7960.14	-1.3314	0.423665	-3.14259	0.00167461	0.00796411	7960.14	-2.58603	0.423902	-6.10053	1.05718e-09	2.87807e-08	VIT_16s0100g00950	AT5G13930.1	3.2e-89	330.1	1-to-1	NA	AT5G13930.1	Chalcone and stilbene synthase family protein	Encodes chalcone synthase (CHS)%2C a key enzyme involved in the biosynthesis of flavonoids. Required for the accumulation of purple anthocyanins in leaves and stems. Also involved in the regulation of auxin transport and the modulation of root gravitropism.	"TT4"	ATCHS.CHS.CHALCONE SYNTHASE	TRANSPARENT TESTA 4	TRANSPARENT TESTA 4 (TT4)%3B FUNCTIONS IN: naringenin-chalcone synthase activity%3B INVOLVED IN: in 11 processes%3B LOCATED IN: plant-type vacuole membrane%2C endoplasmic reticulum%2C nucleus%3B EXPRESSED IN: 22 plant structures%3B EXPRESSED DURING: 14 growth stages%3B CONTAINS InterPro DOMAIN/s: Chalcone/stilbene synthase%2C N-terminal (InterPro:IPR001099)%2C Thiolase-like (InterPro:IPR016039)%2…	****	PMID:10987549.PMID:10677434.PMID:10631255.PMID:10536025.PMID:9794081.PMID:9501110.PMID:8672888.PMID:8685272.PMID:8528278.PMID:8528277.PMID:2780550.PMID:3386631.PMID:11080303.PMID:11139518.PMID:11136235.PMID:11402184.PMID:12271060.PMID:12212845.PMID:1840523.PMID:14617075.PMID:14966245.PMID:15100399.PMID:15053760.PMID:15208397.PMID:15185374.PMID:15347797.PMID:15705950.PMID:15705952.PMID:15781573.PM…	"VviSTS25 and VviSTS26"	'50.2.3'	'Enzyme classification.EC_2 transferases.EC_2.3 acyltransferase'	'Enzyme classification.EC_2 transferases.EC_2.3 acyltransferase(50.2.3 : 434.4) & Stilbene synthase 2 OS=Vitis vinifera (sp|p51070|ths2_vitvi : 420.0) (original description: none)'
Vitvi18g02075	434.909	-2.01974	0.476459	-4.23907	2.24448e-05	0.00164417	434.909	-2.62901	0.533229	-4.93035	8.20806e-07	1.5244e-05	434.909	-2.16634	0.47556	-4.55533	5.23025e-06	5.70945e-05	434.909	-2.42984	0.477641	-5.08717	3.63442e-07	5.60207e-06	VIT_18s0041g01290	AT5G47850.1	1.9e-150	531.6	1-to-1	NA	AT5G47850.1	CRINKLY4 related 4	NA	"CCR4"	NA	CRINKLY4 related 4	CRINKLY4 related 4 (CCR4)%3B FUNCTIONS IN: kinase activity%3B INVOLVED IN: protein amino acid phosphorylation%3B LOCATED IN: endomembrane system%3B EXPRESSED IN: stem%3B CONTAINS InterPro DOMAIN/s: Protein kinase%2C ATP binding site (InterPro:IPR017441)%2C Regulator of chromosome condensation/beta-lactamase-inhibitor protein II (InterPro:IPR009091)%2C Protein kinase%2C catalytic domain (InterPro:…	*****	gene:2160951.UniProt:Q9FIJ6	NA	'18.8.1.26'	'Protein modification.phosphorylation.TKL kinase superfamily.Crinkly-like kinase'	'Protein modification.phosphorylation.TKL kinase superfamily.Crinkly-like kinase (original description: none)'
Vitvi10g00521	453.248	-2.02097	0.427339	-4.7292	2.25405e-06	0.000313119	453.248	-3.40521	0.479367	-7.10354	1.21603e-12	7.34143e-11	453.248	-1.90501	0.426042	-4.47142	7.77007e-06	8.0792e-05	453.248	-2.42099	0.426103	-5.68171	1.33357e-08	2.86851e-07	VIT_10s0003g00580	AT4G17500.1	9.4e-32	136	1-to-1	NA	AT4G17500.1	ethylene responsive element binding factor 1	Encodes a member of the ERF (ethylene response factor) subfamily B-3 of ERF/AP2 transcription factor family (ATERF-1). The protein contains one AP2 domain. There are 18 members in this subfamily including ATERF-1%2C ATERF-2%2C AND ATERF-5.	"ERF-1"	ATERF-1.ethylene responsive element binding factor 1.AtERF	NA	NA	NA	NA	VviERF131	'15.7.7.1'	'RNA biosynthesis.transcriptional activation.AP2/ERF superfamily.ERF-type transcription factor'	'RNA biosynthesis.transcriptional activation.AP2/ERF superfamily.ERF-type transcription factor (original description: none)'
Vitvi19g01328	2431.58	-2.02515	0.296764	-6.82412	8.84648e-12	3.05469e-08	2431.58	-2.43721	0.329398	-7.39898	1.37235e-13	1.00264e-11	2431.58	-4.32433	0.302577	-14.2917	2.46613e-46	3.21299e-42	2431.58	-1.67538	0.293419	-5.70985	1.13074e-08	2.46492e-07	VIT_19s0093g00320	AT1G17170.1	1.3e-35	148.3	1-to-1	NA	AT1G17170.1	glutathione S-transferase TAU 24	Encodes glutathione transferase belonging to the tau class of GSTs. Naming convention according to Wagner et al. (2002).	"GSTU24"	ATGSTU24.glutathione S-transferase TAU 24.GST.Arabidopsis thaliana Glutathione S-transferase (class tau) 24	glutathione S-transferase TAU 24	glutathione S-transferase TAU 24 (GSTU24)%3B FUNCTIONS IN: glutathione transferase activity%2C glutathione binding%3B INVOLVED IN: response to cyclopentenone%2C toxin catabolic process%3B LOCATED IN: cytoplasm%3B EXPRESSED IN: 15 plant structures%3B EXPRESSED DURING: 6 growth stages%3B CONTAINS InterPro DOMAIN/s: Thioredoxin fold (InterPro:IPR012335)%2C Glutathione S-transferase%2C C-terminal (In…	****	PMID:17368510.PMID:17921343.PMID:18334669.gene:2020321.UniProt:Q9SHH6	NA	'18.12.1.4'	'Protein modification.S-glutathionylation and deglutathionylation.glutathione S-transferase activities.class tau'	'Protein modification.S-glutathionylation and deglutathionylation.glutathione S-transferase activities.class tau (original description: none)'
Vitvi09g01399	295.213	-2.02975	0.397437	-5.1071	3.27141e-07	7.3216e-05	295.213	-4.77336	0.466184	-10.2392	1.32298e-24	6.22901e-22	295.213	-2.17571	0.411891	-5.28225	1.27609e-07	2.07043e-06	295.213	-4.71089	0.416418	-11.3129	1.13306e-29	8.02885e-27	VIT_09s0054g00910	AT3G50930.1	3.6e-89	327.4	1-to-many	AT3G50940.1	AT3G50930.1	cytochrome BC1 synthesi	Encodes a protein that is present in a homo-multimeric protein complex on the outer mitochondrial membrane and plays a role in cell death and amplifying salicylic acid signalling.	"BCS1"	AtBCS1.AtOM66.OM66.Outer Mitochondrial membrane protein of 66 kDa	cytochrome BC1 synthesis	cytochrome BC1 synthesis (BCS1)%3B FUNCTIONS IN: nucleoside-triphosphatase activity%2C ATPase activity%2C nucleotide binding%2C ATP binding%3B LOCATED IN: mitochondrion%3B EXPRESSED IN: 24 plant structures%3B EXPRESSED DURING: 13 growth stages%3B CONTAINS InterPro DOMAIN/s: ATPase%2C AAA-type%2C core (InterPro:IPR003959)%2C ATPase%2C AAA+ type%2C core (InterPro:IPR003593)%2C ATPase%2C AAA-type%2C…	*****	PMID:14671022.PMID:15276431.PMID:16618929.gene:2077996.UniProt:Q8VZG2	NA	'35.1'	'not assigned.annotated'	'AAA-ATPase At3g50940 OS=Arabidopsis thaliana (sp|q147f9|aatpc_arath : 323.0)'
Vitvi01g00525	2060.15	-2.03378	0.429292	-4.73752	2.16355e-06	0.000308849	2060.15	-4.00238	0.48217	-8.30077	1.03438e-16	1.36325e-14	2060.15	-1.71885	0.428671	-4.00971	6.07943e-05	0.00047989	2060.15	-3.88073	0.430541	-9.01362	1.99367e-19	3.21072e-17	VIT_01s0011g06140	AT5G37490.1	8.7e-106	382.5	1-to-1	NA	AT5G37490.1	ARM repeat superfamily protein	NA	NA	NA	NA	ARM repeat superfamily protein%3B FUNCTIONS IN: ubiquitin-protein ligase activity%2C binding%3B INVOLVED IN: response to chitin%3B LOCATED IN: ubiquitin ligase complex%3B EXPRESSED IN: 14 plant structures%3B EXPRESSED DURING: 7 growth stages%3B CONTAINS InterPro DOMAIN/s: U box domain (InterPro:IPR003613)%2C Armadillo-like helical (InterPro:IPR011989)%2C Armadillo-type fold (InterPro:IPR016024)%3…	*****	PMID:17722694.gene:2169860.UniProt:Q5PNY6	NA	'35.1'	'not assigned.annotated'	'U-box domain-containing protein 21 OS=Arabidopsis thaliana (sp|q5pny6|pub21_arath : 339.0)'
Vitvi05g00468	19681.3	-2.06609	0.510918	-4.04387	5.25759e-05	0.00309954	19681.3	-4.65523	0.571621	-8.1439	3.82742e-16	4.59019e-14	19681.3	-2.54564	0.510844	-4.9832	6.25411e-07	8.65455e-06	19681.3	-4.26294	0.51114	-8.34006	7.42513e-17	7.86968e-15	VIT_05s0020g03140	AT5G26340.1	3.1e-147	521.5	1-to-1	NA	AT5G26340.1	Major facilitator superfamily protein	Encodes a protein with high affinity%2C hexose-specific/H+ symporter activity. The activity of the transporter appears to be negatively regulated by phosphorylation. Importantly%2C microarray analysis%2C as well as the study of the expression of this gene in mutants involved in programmed cell death (PCD) demonstrated a tight correlation between this gene's expression and PCD.	"MSS1"	NA	NA	MSS1%3B FUNCTIONS IN: carbohydrate transmembrane transporter activity%2C high-affinity hydrogen:glucose symporter activity%2C sugar:hydrogen symporter activity%2C hexose:hydrogen symporter activity%3B INVOLVED IN: response to salt stress%2C apoptosis%2C phosphorylation%3B LOCATED IN: plasma membrane%2C membrane%3B EXPRESSED IN: 22 plant structures%3B EXPRESSED DURING: 10 growth stages%3B CONTAINS…	****	PMID:11351099.PMID:14506206.PMID:17317660.gene:2151073.UniProt:Q94AZ2	NA	'24.2.2.1.6'	'Solute transport.carrier-mediated transport.MFS superfamily.SP family.monosaccharide transporter (STP-type)'	'Solute transport.carrier-mediated transport.MFS superfamily.SP family.monosaccharide transporter (STP-type) (original description: none)'
Vitvi11g01045	9033.6	-2.07869	0.444269	-4.6789	2.88424e-06	0.000370824	9033.6	-3.27614	0.497086	-6.59068	4.37816e-11	2.04623e-09	9033.6	-2.42595	0.444177	-5.46168	4.71653e-08	8.51688e-07	9033.6	-2.82471	0.444295	-6.35773	2.04759e-10	6.48559e-09	VIT_11s0078g00290	AT2G30490.1	8.8e-91	332.8	1-to-1	NA	AT2G30490.1	cinnamate-4-hydroxylase	Encodes a cinnamate-4-hydroxylase. Mutations in this gene impact phenylpropanoid metabolism%2C growth and development.	"C4H"	ATC4H.CINNAMATE 4-HYDROXYLASE.CYP73A5.REF3.REDUCED EPRDERMAL FLUORESCENCE 3	cinnamate-4-hydroxylase	cinnamate-4-hydroxylase (C4H)%3B FUNCTIONS IN: trans-cinnamate 4-monooxygenase activity%3B INVOLVED IN: in 9 processes%3B LOCATED IN: endoplasmic reticulum%2C plasma membrane%2C membrane%2C plant-type cell wall%3B EXPRESSED IN: 25 plant structures%3B EXPRESSED DURING: 14 growth stages%3B CONTAINS InterPro DOMAIN/s: Cytochrome P450 (InterPro:IPR001128)%2C Cytochrome P450%2C E-class%2C group I (Int…	****	PMID:10535921.PMID:9618461.PMID:9449848.PMID:9235908.PMID:9085571.PMID:9085570.PMID:8692910.PMID:15932991.PMID:16287169.PMID:16618929.PMID:17151019.PMID:17317660.PMID:17394776.PMID:17432890.PMID:17644812.gene:2064401.UniProt:P92994	"C4H"	'50.1.13'	'Enzyme classification.EC_1 oxidoreductases.EC_1.14 oxidoreductase acting on paired donor with incorporation or reduction of molecular oxygen'	'Cytochrome P450 CYP73A100 OS=Panax ginseng (sp|h2dh22|c7a10_pangi : 439.0) & Enzyme classification.EC_1 oxidoreductases.EC_1.14 oxidoreductase acting on paired donor with incorporation or reduction of molecular oxygen(50.1.13 : 387.3) (original description: none)'
Vitvi16g01374	2288.61	-2.08087	0.501361	-4.15044	3.31844e-05	0.00221769	2288.61	-2.80193	0.561165	-4.99306	5.94312e-07	1.15346e-05	2288.61	-1.63374	0.501223	-3.2595	0.00111607	0.00566779	2288.61	-2.75158	0.501714	-5.48437	4.14947e-08	8.02737e-07		AT2G46620.1	1.1e-139	495.4	1-to-1	NA	AT2G46620.1	P-loop containing nucleoside triphosphate hydrolases superfamily protein	NA	NA	NA	NA	P-loop containing nucleoside triphosphate hydrolases superfamily protein%3B FUNCTIONS IN: nucleoside-triphosphatase activity%2C ATPase activity%2C nucleotide binding%2C ATP binding%3B LOCATED IN: endomembrane system%3B EXPRESSED IN: 22 plant structures%3B EXPRESSED DURING: 13 growth stages%3B CONTAINS InterPro DOMAIN/s: ATPase%2C AAA+ type%2C core (InterPro:IPR003593)%2C ATPase%2C AAA-type%2C cor…	*****	gene:2039980.UniProt:F4IJ77	NA	'35.1'	'not assigned.annotated'	'AAA-ATPase At2g46620 OS=Arabidopsis thaliana (sp|f4ij77|aatp4_arath : 456.0)'
Vitvi12g02388	758.17	-2.09551	0.456792	-4.58745	4.48689e-06	0.000542263	758.17	-3.1244	0.513853	-6.08034	1.19931e-09	4.23507e-08	758.17	-1.57343	0.457393	-3.44	0.000581706	0.00328014	758.17	-2.88514	0.455401	-6.33538	2.36763e-10	7.40474e-09	VIT_12s0059g01720	NA	NA	NA	NA	NA	NA	NA	NA	NA	NA	NA	NA	NA	NA	NA	'35.2'	'not assigned.not annotated'	' no hits & (original description: none)'
Vitvi07g00365	48.8031	-2.10765	0.482686	-4.3665	1.26251e-05	0.00116466	48.8031	-7.48866	1.07968	-6.93602	4.03311e-12	2.22917e-10	48.8031	-5.15161	1.08635	-4.74214	2.11477e-06	2.56063e-05	48.8031	-4.62054	0.501249	-9.21805	3.02552e-20	5.35971e-18	VIT_07s0005g00920	NA	NA	NA	NA	NA	NA	NA	NA	NA	NA	NA	NA	NA	NA	NA	'35.1'	'not assigned.annotated'	'Pathogenesis-related protein STH-21 OS=Solanum tuberosum (sp|p17641|prs1_soltu : 105.0)'
Vitvi16g01486	11984.7	-2.11135	0.445431	-4.74002	2.13697e-06	0.000307457	11984.7	-3.44243	0.498127	-6.91075	4.82089e-12	2.61904e-10	11984.7	-1.88256	0.445479	-4.22592	2.3797e-05	0.000213894	11984.7	-3.26892	0.445385	-7.33953	2.1434e-13	1.25374e-11	VIT_16s0100g00770	AT5G13930.1	4.6e-148	523.1	1-to-1	NA	AT5G13930.1	Chalcone and stilbene synthase family protein	Encodes chalcone synthase (CHS)%2C a key enzyme involved in the biosynthesis of flavonoids. Required for the accumulation of purple anthocyanins in leaves and stems. Also involved in the regulation of auxin transport and the modulation of root gravitropism.	"TT4"	ATCHS.CHS.CHALCONE SYNTHASE	TRANSPARENT TESTA 4	TRANSPARENT TESTA 4 (TT4)%3B FUNCTIONS IN: naringenin-chalcone synthase activity%3B INVOLVED IN: in 11 processes%3B LOCATED IN: plant-type vacuole membrane%2C endoplasmic reticulum%2C nucleus%3B EXPRESSED IN: 22 plant structures%3B EXPRESSED DURING: 14 growth stages%3B CONTAINS InterPro DOMAIN/s: Chalcone/stilbene synthase%2C N-terminal (InterPro:IPR001099)%2C Thiolase-like (InterPro:IPR016039)%2…	****	PMID:10987549.PMID:10677434.PMID:10631255.PMID:10536025.PMID:9794081.PMID:9501110.PMID:8672888.PMID:8685272.PMID:8528278.PMID:8528277.PMID:2780550.PMID:3386631.PMID:11080303.PMID:11139518.PMID:11136235.PMID:11402184.PMID:12271060.PMID:12212845.PMID:1840523.PMID:14617075.PMID:14966245.PMID:15100399.PMID:15053760.PMID:15208397.PMID:15185374.PMID:15347797.PMID:15705950.PMID:15705952.PMID:15781573.PM…	"VviSTS9"	'9.2.2.1'	'Secondary metabolism.phenolics.flavonoid synthesis and modification.chalcone synthase'	'Secondary metabolism.phenolics.flavonoid synthesis and modification.chalcone synthase (original description: none)'
Vitvi16g01464	13551.4	-2.12464	0.432736	-4.90977	9.11816e-07	0.000159707	13551.4	-3.04008	0.48397	-6.28155	3.35224e-10	1.34433e-08	13551.4	-2.03514	0.432733	-4.70299	2.56378e-06	3.0338e-05	13551.4	-2.96637	0.432796	-6.85396	7.18335e-12	3.09295e-10	VIT_16s0100g00910	AT5G13930.1	2.7e-148	523.9	1-to-1	NA	AT5G13930.1	Chalcone and stilbene synthase family protein	Encodes chalcone synthase (CHS)%2C a key enzyme involved in the biosynthesis of flavonoids. Required for the accumulation of purple anthocyanins in leaves and stems. Also involved in the regulation of auxin transport and the modulation of root gravitropism.	"TT4"	ATCHS.CHS.CHALCONE SYNTHASE	TRANSPARENT TESTA 4	TRANSPARENT TESTA 4 (TT4)%3B FUNCTIONS IN: naringenin-chalcone synthase activity%3B INVOLVED IN: in 11 processes%3B LOCATED IN: plant-type vacuole membrane%2C endoplasmic reticulum%2C nucleus%3B EXPRESSED IN: 22 plant structures%3B EXPRESSED DURING: 14 growth stages%3B CONTAINS InterPro DOMAIN/s: Chalcone/stilbene synthase%2C N-terminal (InterPro:IPR001099)%2C Thiolase-like (InterPro:IPR016039)%2…	****	PMID:10987549.PMID:10677434.PMID:10631255.PMID:10536025.PMID:9794081.PMID:9501110.PMID:8672888.PMID:8685272.PMID:8528278.PMID:8528277.PMID:2780550.PMID:3386631.PMID:11080303.PMID:11139518.PMID:11136235.PMID:11402184.PMID:12271060.PMID:12212845.PMID:1840523.PMID:14617075.PMID:14966245.PMID:15100399.PMID:15053760.PMID:15208397.PMID:15185374.PMID:15347797.PMID:15705950.PMID:15705952.PMID:15781573.PM…	"VviSTS21"	'9.2.2.1'	'Secondary metabolism.phenolics.flavonoid synthesis and modification.chalcone synthase'	'Secondary metabolism.phenolics.flavonoid synthesis and modification.chalcone synthase (original description: none)'
Vitvi16g01437	43.7207	-2.12987	0.454292	-4.68833	2.75441e-06	0.00035794	43.7207	-1.78563	0.50916	-3.50701	0.000453166	0.00359026	43.7207	-1.63322	0.442392	-3.69179	0.000222682	0.00144555	43.7207	-2.13632	0.456624	-4.6785	2.88979e-06	3.63708e-05	VIT_16s0013g01090	AT5G51190.1	6.6e-39	159.8	1-to-1	NA	AT5G51190.1	Integrase-type DNA-binding superfamily protein	encodes a member of the ERF (ethylene response factor) subfamily B-3 of ERF/AP2 transcription factor family. The protein contains one AP2 domain. There are 18 members in this subfamily including ATERF-1%2C ATERF-2%2C AND ATERF-5.	NA	ERF105.ethylene response factor 105	NA	Integrase-type DNA-binding superfamily protein%3B CONTAINS InterPro DOMAIN/s: DNA-binding%2C integrase-type (InterPro:IPR016177)%2C Pathogenesis-related transcriptional factor/ERF%2C DNA-binding (InterPro:IPR001471)%3B BEST Arabidopsis thaliana protein match is: ethylene response factor 104 (TAIR:AT5G61600.1)%3B Has 30201 Blast hits to 17322 proteins in 780 species: Archae - 12%3B Bacteria - 1396…	*****	PMID:11118137.PMID:16280546.PMID:16407444.PMID:17722694.gene:2176186.UniProt:Q8VY90	VviERF6L10	'15.7.7.1'	'RNA biosynthesis.transcriptional activation.AP2/ERF superfamily.ERF-type transcription factor'	'RNA biosynthesis.transcriptional activation.AP2/ERF superfamily.ERF-type transcription factor (original description: none)'
Vitvi14g02866	651.074	-2.13041	0.431303	-4.93946	7.83389e-07	0.000143449	651.074	-3.91354	0.487705	-8.02439	1.0203e-15	1.10859e-13	651.074	-2.26361	0.42832	-5.28485	1.25806e-07	2.045e-06	651.074	-3.96345	0.430452	-9.20766	3.33318e-20	5.78085e-18		AT2G47485.1	4.4e-11	66.6	1-to-1	NA	AT2G47485.1	hypothetical protein	NA	NA	NA	NA	unknown protein%3B BEST Arabidopsis thaliana protein match is: unknown protein (TAIR:AT3G62650.1)%3B Has 35333 Blast hits to 34131 proteins in 2444 species: Archae - 798%3B Bacteria - 22429%3B Metazoa - 974%3B Fungi - 991%3B Plants - 531%3B Viruses - 0%3B Other Eukaryotes - 9610 (source: NCBI BLink).	*****	gene:1006228349.UniProt:Q6DBG0	NA	'35.2'	'not assigned.not annotated'	' no hits & (original description: none)'
Vitvi16g00055	7681.01	-2.13106	0.502096	-4.24434	2.19242e-05	0.00162058	7681.01	-3.31378	0.561361	-5.90312	3.567e-09	1.14509e-07	7681.01	-1.7369	0.502024	-3.45979	0.000540598	0.00308235	7681.01	-3.6218	0.501997	-7.21479	5.40183e-13	2.86876e-11	VIT_16s0039g01130	AT2G37040.1	1.2e-297	1020.4	1-to-1	NA	AT2G37040.1	PHE ammonia lyase 1	Encodes PAL1%2C a phenylalanine ammonia-lyase. Arabidopsis has four PALs: AT2G37040 (PAL1)%2C AT3G53260 (PAL2)%2C AT5G04230 (PAL3) and AT3G10340 (PAL4).	"PAL1"	ATPAL1	PHE ammonia lyase 1	PHE ammonia lyase 1 (PAL1)%3B FUNCTIONS IN: phenylalanine ammonia-lyase activity%3B INVOLVED IN: in 10 processes%3B LOCATED IN: cytoplasm%3B EXPRESSED IN: 22 plant structures%3B EXPRESSED DURING: 13 growth stages%3B CONTAINS InterPro DOMAIN/s: Phenylalanine/histidine ammonia-lyase (InterPro:IPR001106)%2C Phenylalanine/histidine ammonia-lyases%2C active site (InterPro:IPR022313)%2C L-Aspartase-lik…	****	PMID:7888622.PMID:15634198.PMID:16299170.PMID:17158583.PMID:18251883.PMID:18242769.gene:2057980.UniProt:P35510	"PAL1"	'9.2.1.1'	'Secondary metabolism.phenolics.p-coumaroyl-CoA synthesis.phenylalanine ammonia lyase (PAL)'	'Secondary metabolism.phenolics.p-coumaroyl-CoA synthesis.phenylalanine ammonia lyase (PAL) (original description: none)'
Vitvi16g01482	5722.95	-2.14285	0.52099	-4.11303	3.90505e-05	0.0024774	5722.95	-2.45461	0.582553	-4.21354	2.51405e-05	0.000304524	5722.95	-1.63792	0.520892	-3.14445	0.00166397	0.00792505	5722.95	-2.27467	0.520879	-4.36698	1.25977e-05	0.000132951	VIT_16s0100g01170	AT5G13930.1	5.8e-148	522.7	1-to-1	NA	AT5G13930.1	Chalcone and stilbene synthase family protein	Encodes chalcone synthase (CHS)%2C a key enzyme involved in the biosynthesis of flavonoids. Required for the accumulation of purple anthocyanins in leaves and stems. Also involved in the regulation of auxin transport and the modulation of root gravitropism.	"TT4"	ATCHS.CHS.CHALCONE SYNTHASE	TRANSPARENT TESTA 4	TRANSPARENT TESTA 4 (TT4)%3B FUNCTIONS IN: naringenin-chalcone synthase activity%3B INVOLVED IN: in 11 processes%3B LOCATED IN: plant-type vacuole membrane%2C endoplasmic reticulum%2C nucleus%3B EXPRESSED IN: 22 plant structures%3B EXPRESSED DURING: 14 growth stages%3B CONTAINS InterPro DOMAIN/s: Chalcone/stilbene synthase%2C N-terminal (InterPro:IPR001099)%2C Thiolase-like (InterPro:IPR016039)%2…	****	PMID:10987549.PMID:10677434.PMID:10631255.PMID:10536025.PMID:9794081.PMID:9501110.PMID:8672888.PMID:8685272.PMID:8528278.PMID:8528277.PMID:2780550.PMID:3386631.PMID:11080303.PMID:11139518.PMID:11136235.PMID:11402184.PMID:12271060.PMID:12212845.PMID:1840523.PMID:14617075.PMID:14966245.PMID:15100399.PMID:15053760.PMID:15208397.PMID:15185374.PMID:15347797.PMID:15705950.PMID:15705952.PMID:15781573.PM…	"VviSTS46"	'9.2.2.1'	'Secondary metabolism.phenolics.flavonoid synthesis and modification.chalcone synthase'	'Secondary metabolism.phenolics.flavonoid synthesis and modification.chalcone synthase (original description: none)'
Vitvi16g01460	7318.96	-2.1454	0.445136	-4.81965	1.43808e-06	0.000222783	7318.96	-2.70554	0.498018	-5.43261	5.55366e-08	1.37624e-06	7318.96	-1.59012	0.445106	-3.57246	0.000353649	0.00214953	7318.96	-2.97045	0.445295	-6.67075	2.545e-11	9.84688e-10	VIT_16s0100g00850	AT5G13930.1	1.5e-147	521.2	1-to-1	NA	AT5G13930.1	Chalcone and stilbene synthase family protein	Encodes chalcone synthase (CHS)%2C a key enzyme involved in the biosynthesis of flavonoids. Required for the accumulation of purple anthocyanins in leaves and stems. Also involved in the regulation of auxin transport and the modulation of root gravitropism.	"TT4"	ATCHS.CHS.CHALCONE SYNTHASE	TRANSPARENT TESTA 4	TRANSPARENT TESTA 4 (TT4)%3B FUNCTIONS IN: naringenin-chalcone synthase activity%3B INVOLVED IN: in 11 processes%3B LOCATED IN: plant-type vacuole membrane%2C endoplasmic reticulum%2C nucleus%3B EXPRESSED IN: 22 plant structures%3B EXPRESSED DURING: 14 growth stages%3B CONTAINS InterPro DOMAIN/s: Chalcone/stilbene synthase%2C N-terminal (InterPro:IPR001099)%2C Thiolase-like (InterPro:IPR016039)%2…	****	PMID:10987549.PMID:10677434.PMID:10631255.PMID:10536025.PMID:9794081.PMID:9501110.PMID:8672888.PMID:8685272.PMID:8528278.PMID:8528277.PMID:2780550.PMID:3386631.PMID:11080303.PMID:11139518.PMID:11136235.PMID:11402184.PMID:12271060.PMID:12212845.PMID:1840523.PMID:14617075.PMID:14966245.PMID:15100399.PMID:15053760.PMID:15208397.PMID:15185374.PMID:15347797.PMID:15705950.PMID:15705952.PMID:15781573.PM…	"VviSTS17"	'9.2.2.1'	'Secondary metabolism.phenolics.flavonoid synthesis and modification.chalcone synthase'	'Secondary metabolism.phenolics.flavonoid synthesis and modification.chalcone synthase (original description: none)'
Vitvi00g01431	3279.98	-2.15541	0.563776	-3.82317	0.000131748	0.00614991	3279.98	-2.34293	0.630348	-3.71689	0.000201693	0.00183669	3279.98	-1.78517	0.56352	-3.1679	0.00153545	0.00740773	3279.98	-2.27784	0.563794	-4.0402	5.34052e-05	0.000466153	VIT_00s2849g00010	AT3G53260.1	1.2e-152	537.3	1-to-1	NA	AT3G53260.1	phenylalanine ammonia-lyase 2	Encodes phenylalanine lyase. Arabidopsis has four PALs: AT2G37040 (PAL1)%2C AT3G53260 (PAL2)%2C AT5G04230 (PAL3) and AT3G10340 (PAL4).	"PAL2"	ATPAL2	phenylalanine ammonia-lyase 2	phenylalanine ammonia-lyase 2 (PAL2)%3B FUNCTIONS IN: phenylalanine ammonia-lyase activity%3B INVOLVED IN: response to oxidative stress%2C response to karrikin%2C phenylpropanoid biosynthetic process%2C response to wounding%2C defense response%3B LOCATED IN: cytoplasm%3B EXPRESSED IN: 22 plant structures%3B EXPRESSED DURING: 14 growth stages%3B CONTAINS InterPro DOMAIN/s: Phenylalanine/histidine …	****	PMID:7888622.PMID:15634198.gene:2101957.UniProt:P45724	"PAL2"	'9.2.1.1'	'Secondary metabolism.phenolics.p-coumaroyl-CoA synthesis.phenylalanine ammonia lyase (PAL)'	'Secondary metabolism.phenolics.p-coumaroyl-CoA synthesis.phenylalanine ammonia lyase (PAL) (original description: none)'
Vitvi13g02457	11016.3	-2.17507	0.558226	-3.8964	9.76319e-05	0.00493695	11016.3	-3.51494	0.624167	-5.63142	1.78732e-08	4.91804e-07	11016.3	-4.69616	0.558247	-8.41233	4.01961e-17	5.10922e-15	11016.3	-3.62016	0.558155	-6.48595	8.81749e-11	2.97933e-09	VIT_13s0158g00090	AT1G01550.1	1.8e-12	71.6	1-to-many	AT1G01550.2	AT1G01550.1	BPS1-like protein (DUF793)	Encodes a protein with no functionally characterized domains that to prevent the synthesis of a novel substance that moves from the root to the shoot%2C where it modifies shoot growth by interfering with auxin signaling. Synthesis and delivery of this substance requires neither phloem nor endodermis.	"BPS1"	NA	BYPASS 1	BYPASS 1 (BPS1)%3B FUNCTIONS IN: molecular_function unknown%3B LOCATED IN: plasma membrane%3B EXPRESSED IN: 24 plant structures%3B EXPRESSED DURING: 13 growth stages%3B CONTAINS InterPro DOMAIN/s: Protein BYPASS related (InterPro:IPR008511)%3B BEST Arabidopsis thaliana protein match is: unknown protein (TAIR:AT2G46080.1)%3B Has 170 Blast hits to 170 proteins in 24 species: Archae - 0%3B Bacteria …	****	PMID:17217459.PMID:17317660.gene:2025405.UniProt:Q9LMM6	NA	'35.2'	'not assigned.not annotated'	' no hits & (original description: none)'
Vitvi10g01391	3824.33	-2.17724	0.532178	-4.09119	4.29162e-05	0.00268044	3824.33	-3.24878	0.595715	-5.45358	4.93654e-08	1.24023e-06	3824.33	-1.70582	0.532274	-3.20479	0.00135162	0.00665142	3824.33	-3.07209	0.532273	-5.77164	7.85033e-09	1.77967e-07	VIT_10s0042g00920	AT5G13930.1	5.9e-149	525.8	1-to-1	NA	AT5G13930.1	Chalcone and stilbene synthase family protein	Encodes chalcone synthase (CHS)%2C a key enzyme involved in the biosynthesis of flavonoids. Required for the accumulation of purple anthocyanins in leaves and stems. Also involved in the regulation of auxin transport and the modulation of root gravitropism.	"TT4"	ATCHS.CHS.CHALCONE SYNTHASE	TRANSPARENT TESTA 4	TRANSPARENT TESTA 4 (TT4)%3B FUNCTIONS IN: naringenin-chalcone synthase activity%3B INVOLVED IN: in 11 processes%3B LOCATED IN: plant-type vacuole membrane%2C endoplasmic reticulum%2C nucleus%3B EXPRESSED IN: 22 plant structures%3B EXPRESSED DURING: 14 growth stages%3B CONTAINS InterPro DOMAIN/s: Chalcone/stilbene synthase%2C N-terminal (InterPro:IPR001099)%2C Thiolase-like (InterPro:IPR016039)%2…	****	PMID:10987549.PMID:10677434.PMID:10631255.PMID:10536025.PMID:9794081.PMID:9501110.PMID:8672888.PMID:8685272.PMID:8528278.PMID:8528277.PMID:2780550.PMID:3386631.PMID:11080303.PMID:11139518.PMID:11136235.PMID:11402184.PMID:12271060.PMID:12212845.PMID:1840523.PMID:14617075.PMID:14966245.PMID:15100399.PMID:15053760.PMID:15208397.PMID:15185374.PMID:15347797.PMID:15705950.PMID:15705952.PMID:15781573.PM…	"VviSTS5"	'9.2.2.1'	'Secondary metabolism.phenolics.flavonoid synthesis and modification.chalcone synthase'	'Secondary metabolism.phenolics.flavonoid synthesis and modification.chalcone synthase (original description: none)'
Vitvi02g00263	1678.34	-2.18547	0.442775	-4.93585	7.98031e-07	0.000145032	1678.34	-3.55734	0.495129	-7.18468	6.73658e-13	4.26064e-11	1678.34	-2.62629	0.441516	-5.94835	2.70867e-09	6.62098e-08	1678.34	-3.09356	0.441183	-7.01196	2.34999e-12	1.11013e-10	VIT_02s0025g02920	AT5G54160.1	3.7e-55	214.2	1-to-1	NA	AT5G54160.1	O-methyltransferase 1	A caffeic acid/5-hydroxyferulic acid O-methyltransferase. Interacts with 14-4-3 proteins in yeast 2 hybrid assay. AtOMT1 (At5g54160) encodes a flavonol 3?-O-methyltransferase that is highly active towards quercetin and myricetin. The substrate specificity identifies the enzyme as flavonol 3?-methyltransferase which replaces the former annotation of the gene to encode a caffeic acid/5-hydroxyferul…	"OMT1"	ATOMT1.O-methyltransferase 1.AtCOMT.COMT1.caffeate O-methyltransferase 1.OMT3.O-methyltransferase 3	O-methyltransferase 1	O-methyltransferase 1 (OMT1)%3B FUNCTIONS IN: myricetin 3'-O-methyltransferase activity%2C quercetin 3-O-methyltransferase activity%2C caffeate O-methyltransferase activity%3B INVOLVED IN: lignin biosynthetic process%2C flavonol biosynthetic process%3B LOCATED IN: cytosol%2C nucleus%2C plasma membrane%2C cytoplasm%3B EXPRESSED IN: 23 plant structures%3B EXPRESSED DURING: 14 growth stages%3B CONTA…	****	PMID:9349713.PMID:9484457.PMID:17317660.gene:2153422.UniProt:Q9FK25	NA	'50.2.1'	'Enzyme classification.EC_2 transferases.EC_2.1 transferase transferring one-carbon group'	'Enzyme classification.EC_2 transferases.EC_2.1 transferase transferring one-carbon group(50.2.1 : 295.4) & Caffeic acid 3-O-methyltransferase OS=Rosa chinensis (sp|q8gu25|comt1_rosch : 155.0) (original description: none)'
Vitvi16g00991	24156	-2.1938	0.416749	-5.26409	1.40889e-07	3.82633e-05	24156	-3.04841	0.466225	-6.53849	6.21412e-11	2.80629e-09	24156	-2.23392	0.416754	-5.36029	8.30881e-08	1.4132e-06	24156	-2.96855	0.416926	-7.12008	1.07863e-12	5.44831e-11	VIT_16s0100g00830	AT5G13930.1	2.5e-148	523.9	1-to-1	NA	AT5G13930.1	Chalcone and stilbene synthase family protein	Encodes chalcone synthase (CHS)%2C a key enzyme involved in the biosynthesis of flavonoids. Required for the accumulation of purple anthocyanins in leaves and stems. Also involved in the regulation of auxin transport and the modulation of root gravitropism.	"TT4"	ATCHS.CHS.CHALCONE SYNTHASE	TRANSPARENT TESTA 4	TRANSPARENT TESTA 4 (TT4)%3B FUNCTIONS IN: naringenin-chalcone synthase activity%3B INVOLVED IN: in 11 processes%3B LOCATED IN: plant-type vacuole membrane%2C endoplasmic reticulum%2C nucleus%3B EXPRESSED IN: 22 plant structures%3B EXPRESSED DURING: 14 growth stages%3B CONTAINS InterPro DOMAIN/s: Chalcone/stilbene synthase%2C N-terminal (InterPro:IPR001099)%2C Thiolase-like (InterPro:IPR016039)%2…	****	PMID:10987549.PMID:10677434.PMID:10631255.PMID:10536025.PMID:9794081.PMID:9501110.PMID:8672888.PMID:8685272.PMID:8528278.PMID:8528277.PMID:2780550.PMID:3386631.PMID:11080303.PMID:11139518.PMID:11136235.PMID:11402184.PMID:12271060.PMID:12212845.PMID:1840523.PMID:14617075.PMID:14966245.PMID:15100399.PMID:15053760.PMID:15208397.PMID:15185374.PMID:15347797.PMID:15705950.PMID:15705952.PMID:15781573.PM…	"VviSTS15"	'9.2.2.1'	'Secondary metabolism.phenolics.flavonoid synthesis and modification.chalcone synthase'	'Secondary metabolism.phenolics.flavonoid synthesis and modification.chalcone synthase (original description: none)'
Vitvi16g01502	14266.8	-2.1965	0.476247	-4.61209	3.98631e-06	0.000489102	14266.8	-3.21478	0.532512	-6.03701	1.56999e-09	5.40879e-08	14266.8	-1.7994	0.476235	-3.7784	0.000157842	0.00108605	14266.8	-3.3511	0.476278	-7.03602	1.97808e-12	9.45246e-11	VIT_16s0039g01110	AT2G37040.1	5.1e-297	1019.6	1-to-1	NA	AT2G37040.1	PHE ammonia lyase 1	Encodes PAL1%2C a phenylalanine ammonia-lyase. Arabidopsis has four PALs: AT2G37040 (PAL1)%2C AT3G53260 (PAL2)%2C AT5G04230 (PAL3) and AT3G10340 (PAL4).	"PAL1"	ATPAL1	PHE ammonia lyase 1	PHE ammonia lyase 1 (PAL1)%3B FUNCTIONS IN: phenylalanine ammonia-lyase activity%3B INVOLVED IN: in 10 processes%3B LOCATED IN: cytoplasm%3B EXPRESSED IN: 22 plant structures%3B EXPRESSED DURING: 13 growth stages%3B CONTAINS InterPro DOMAIN/s: Phenylalanine/histidine ammonia-lyase (InterPro:IPR001106)%2C Phenylalanine/histidine ammonia-lyases%2C active site (InterPro:IPR022313)%2C L-Aspartase-lik…	****	PMID:7888622.PMID:15634198.PMID:16299170.PMID:17158583.PMID:18251883.PMID:18242769.gene:2057980.UniProt:P35510	"PAL1"	'9.2.1.1'	'Secondary metabolism.phenolics.p-coumaroyl-CoA synthesis.phenylalanine ammonia lyase (PAL)'	'Secondary metabolism.phenolics.p-coumaroyl-CoA synthesis.phenylalanine ammonia lyase (PAL) (original description: none)'
Vitvi10g01879	270.085	-2.19668	0.571817	-3.84158	0.000122246	0.00581656	270.085	-4.78195	0.61678	-7.75308	8.96902e-15	8.02948e-13	270.085	-4.92041	0.583265	-8.43597	3.28463e-17	4.2581e-15	270.085	-4.37446	0.544666	-8.03145	9.63251e-16	8.71883e-14	VIT_10s0003g03790	AT2G34600.1	4.2e-09	60.8	1-to-1	NA	AT2G34600.1	jasmonate-zim-domain protein 7	NA	"JAZ7"	TIFY5B	jasmonate-zim-domain protein 7	jasmonate-zim-domain protein 7 (JAZ7)%3B CONTAINS InterPro DOMAIN/s: Tify (InterPro:IPR010399)%3B BEST Arabidopsis thaliana protein match is: jasmonate-zim-domain protein 8 (TAIR:AT1G30135.1)%3B Has 38 Blast hits to 38 proteins in 7 species: Archae - 0%3B Bacteria - 0%3B Metazoa - 0%3B Fungi - 0%3B Plants - 38%3B Viruses - 0%3B Other Eukaryotes - 0 (source: NCBI BLink).	*****	PMID:17637677.PMID:17722694.gene:2062344.UniProt:O64687	NA	'15.7.48'	'RNA biosynthesis.transcriptional activation.TIFY transcription factor'	'RNA biosynthesis.transcriptional activation.TIFY transcription factor (original description: none)'
Vitvi04g01748	3103.85	-2.20084	0.460879	-4.7753	1.79436e-06	0.000267724	3103.85	-4.37094	0.518236	-8.43428	3.33247e-17	5.01349e-15	3103.85	-1.57104	0.460514	-3.41149	0.000646099	0.00358048	3103.85	-3.58929	0.461338	-7.78018	7.24226e-15	5.43856e-13	VIT_04s0044g01880	AT1G20925.1	2e-21	104.4	1-to-1	NA	AT1G20925.1	Auxin efflux carrier family protein	NA	NA	PILS1.PIN-LIKES 1	NA	Auxin efflux carrier family protein%3B FUNCTIONS IN: auxin:hydrogen symporter activity%3B INVOLVED IN: auxin polar transport%2C transmembrane transport%3B LOCATED IN: integral to membrane%3B CONTAINS InterPro DOMAIN/s: Auxin efflux carrier (InterPro:IPR004776)%3B BEST Arabidopsis thaliana protein match is: Auxin efflux carrier family protein (TAIR:AT1G76520.2)%3B Has 641 Blast hits to 607 protein…	**	gene:504954044.UniProt:F4HWB6	NA	'11.2.4.2'	'Phytohormones.auxin.transport.PILS-type auxin efflux transporter'	'Phytohormones.auxin.transport.PILS-type auxin efflux transporter (original description: none)'
Vitvi13g01389	785.038	-2.21459	0.279912	-7.91173	2.5383e-15	2.04511e-11	785.038	-1.285	0.305862	-4.20126	2.65436e-05	0.000318035	785.038	-1.92351	0.28892	-6.65761	2.78323e-11	1.03752e-09	785.038	-1.61071	0.274746	-5.86256	4.55797e-09	1.09457e-07	VIT_13s0084g00130	AT1G68620.1	7.2e-48	189.9	1-to-1	NA	AT1G68620.1	alpha/beta-Hydrolases superfamily protein	NA	NA	NA	NA	alpha/beta-Hydrolases superfamily protein%3B FUNCTIONS IN: hydrolase activity%3B INVOLVED IN: metabolic process%3B LOCATED IN: cellular_component unknown%3B EXPRESSED IN: 11 plant structures%3B EXPRESSED DURING: LP.06 six leaves visible%2C LP.04 four leaves visible%2C 4 anthesis%2C C globular stage%2C petal differentiation and expansion stage%3B CONTAINS InterPro DOMAIN/s: Lipase%2C GDXG%2C activ…	*****	gene:2026919.UniProt:Q9SX25	NA	'35.1'	'not assigned.annotated'	'Probable carboxylesterase 6 OS=Arabidopsis thaliana (sp|q9sx25|cxe6_arath : 182.0)'
Vitvi14g02913	47.88	-2.21669	0.55577	-3.98849	6.64941e-05	0.00369478	47.88	-4.17648	0.726964	-5.74509	9.18696e-09	2.71288e-07	47.88	-2.14375	0.575445	-3.72537	0.000195028	0.00129342	47.88	-2.7742	0.571044	-4.85812	1.18504e-06	1.63734e-05	VIT_14s0083g00920	NA	NA	NA	NA	NA	NA	NA	NA	NA	NA	NA	NA	NA	NA	NA	'35.2'	'not assigned.not annotated'	' no hits & (original description: none)'
Vitvi04g00760	99.3057	-2.2339	0.445931	-5.00953	5.4564e-07	0.000108997	99.3057	-4.15255	0.554188	-7.49303	6.73006e-14	5.18521e-12	99.3057	-3.09953	0.489157	-6.33647	2.35082e-10	7.23203e-09	99.3057	-5.1188	0.541494	-9.4531	3.28934e-21	6.79824e-19	VIT_04s0069g00970	AT5G64810.1	6.6e-18	89.7	1-to-1	NA	AT5G64810.1	WRKY DNA-binding protein 51	member of WRKY Transcription Factor%3B Group II-c. Involved in jasmonic acid inducible defense responses.	"WRKY51"	ATWRKY51.ARABIDOPSIS THALIANA WRKY DNA-BINDING PROTEIN 51	WRKY DNA-binding protein 51	WRKY DNA-binding protein 51 (WRKY51)%3B CONTAINS InterPro DOMAIN/s: DNA-binding WRKY (InterPro:IPR003657)%3B BEST Arabidopsis thaliana protein match is: WRKY DNA-binding protein 50 (TAIR:AT5G26170.1)%3B Has 30201 Blast hits to 17322 proteins in 780 species: Archae - 12%3B Bacteria - 1396%3B Metazoa - 17338%3B Fungi - 3422%3B Plants - 5037%3B Viruses - 0%3B Other Eukaryotes - 2996 (source: NCBI BL…	****	PMID:11118137.gene:2177638.UniProt:Q93WU9	"WRKY51"	'15.7.22'	'RNA biosynthesis.transcriptional activation.WRKY transcription factor'	'RNA biosynthesis.transcriptional activation.WRKY transcription factor (original description: none)'
Vitvi12g00675	257.175	-2.237	0.449426	-4.97747	6.44221e-07	0.000124115	257.175	-3.46752	0.521962	-6.64323	3.06881e-11	1.46114e-09	257.175	-2.11022	0.456564	-4.62196	3.80126e-06	4.31024e-05	257.175	-2.95808	0.465326	-6.35699	2.05739e-10	6.50834e-09		AT3G22910.1	1.7e-83	309.7	1-to-1	NA	AT3G22910.1	ATPase E1-E2 type family protein / haloacid dehalogenase-like hydrolase family protein	NA	NA	ACA13.auto-inhibited Ca2+ ATPase 13	NA	ATPase E1-E2 type family protein / haloacid dehalogenase-like hydrolase family protein%3B FUNCTIONS IN: calcium-transporting ATPase activity%2C calmodulin binding%3B INVOLVED IN: cation transport%2C calcium ion transport%2C metabolic process%2C ATP biosynthetic process%3B LOCATED IN: membrane%3B EXPRESSED IN: 12 plant structures%3B EXPRESSED DURING: LP.04 four leaves visible%2C 4 anthesis%2C C gl…	***	PMID:11782485.PMID:12805592.gene:2084577.UniProt:Q9LIK7	NA	'35.1'	'not assigned.annotated'	'Calcium-transporting ATPase 12. plasma membrane-type OS=Arabidopsis thaliana (sp|q9ly77|aca12_arath : 217.0)'
Vitvi12g01480	1143.44	-2.25692	0.435149	-5.18654	2.1424e-07	5.08704e-05	1143.44	-3.58896	0.488667	-7.34438	2.06715e-13	1.45588e-11	1143.44	-3.23082	0.436017	-7.40983	1.26458e-13	7.66305e-12	1143.44	-3.6873	0.434349	-8.48927	2.07946e-17	2.39873e-15		AT4G13830.2	3e-14	76.6	1-to-1	NA	AT4G13830.2	DNAJ-like 20	DnaJ-like protein (J20)%3B nuclear gene	"J20"	DJC26.DNA J protein C26	DNAJ-like 20	DNAJ-like 20 (J20)%3B FUNCTIONS IN: heat shock protein binding%3B INVOLVED IN: protein folding%2C response to stress%3B LOCATED IN: nucleus%3B EXPRESSED IN: 23 plant structures%3B EXPRESSED DURING: 13 growth stages%3B CONTAINS InterPro DOMAIN/s: Molecular chaperone%2C heat shock protein%2C Hsp40%2C DnaJ (InterPro:IPR015609)%2C Heat shock protein DnaJ%2C N-terminal (InterPro:IPR001623)%2C Heat sho…	****	gene:1005714250.UniProt:Q9SDN0	NA	'35.2'	'not assigned.not annotated'	' no hits & (original description: none)'
Vitvi11g00165	1754.49	-2.27046	0.367506	-6.17801	6.49141e-10	5.81125e-07	1754.49	-4.09177	0.415015	-9.85933	6.24633e-23	2.17552e-20	1754.49	-2.87038	0.368315	-7.79328	6.52916e-15	5.13989e-13	1754.49	-4.05653	0.370392	-10.952	6.50137e-28	3.50523e-25	VIT_11s0016g02070	AT5G56960.2	2.7e-21	102.4	1-to-1	NA	AT5G56960.2	basic helix-loop-helix (bHLH) DNA-binding family protein	NA	NA	NA	NA	NA	NA	NA	NA	'15.7.33'	'RNA biosynthesis.transcriptional activation.bHLH transcription factor'	'RNA biosynthesis.transcriptional activation.bHLH transcription factor (original description: none)'
Vitvi16g01503	9495.82	-2.27456	0.509668	-4.46283	8.08848e-06	0.000857485	9495.82	-3.34747	0.569854	-5.87425	4.24751e-09	1.3432e-07	9495.82	-1.7971	0.509598	-3.5265	0.000421099	0.0024932	9495.82	-3.49111	0.509587	-6.85087	7.34042e-12	3.13931e-10	VIT_16s0039g01120	AT2G37040.1	0	1158.7	1-to-1	NA	AT2G37040.1	PHE ammonia lyase 1	Encodes PAL1%2C a phenylalanine ammonia-lyase. Arabidopsis has four PALs: AT2G37040 (PAL1)%2C AT3G53260 (PAL2)%2C AT5G04230 (PAL3) and AT3G10340 (PAL4).	"PAL1"	ATPAL1	PHE ammonia lyase 1	PHE ammonia lyase 1 (PAL1)%3B FUNCTIONS IN: phenylalanine ammonia-lyase activity%3B INVOLVED IN: in 10 processes%3B LOCATED IN: cytoplasm%3B EXPRESSED IN: 22 plant structures%3B EXPRESSED DURING: 13 growth stages%3B CONTAINS InterPro DOMAIN/s: Phenylalanine/histidine ammonia-lyase (InterPro:IPR001106)%2C Phenylalanine/histidine ammonia-lyases%2C active site (InterPro:IPR022313)%2C L-Aspartase-lik…	****	PMID:7888622.PMID:15634198.PMID:16299170.PMID:17158583.PMID:18251883.PMID:18242769.gene:2057980.UniProt:P35510	"PAL1"	'9.2.1.1'	'Secondary metabolism.phenolics.p-coumaroyl-CoA synthesis.phenylalanine ammonia lyase (PAL)'	'Secondary metabolism.phenolics.p-coumaroyl-CoA synthesis.phenylalanine ammonia lyase (PAL) (original description: none)'
Vitvi16g00057	11118.4	-2.28987	0.491996	-4.65426	3.25147e-06	0.000407208	11118.4	-2.63597	0.549967	-4.79297	1.64333e-06	2.80039e-05	11118.4	-1.89232	0.49195	-3.84657	0.000119781	0.000861242	11118.4	-2.71353	0.491875	-5.51671	3.45402e-08	6.77178e-07	VIT_16s0039g01170	AT2G37040.1	0	1159.1	1-to-1	NA	AT2G37040.1	PHE ammonia lyase 1	Encodes PAL1%2C a phenylalanine ammonia-lyase. Arabidopsis has four PALs: AT2G37040 (PAL1)%2C AT3G53260 (PAL2)%2C AT5G04230 (PAL3) and AT3G10340 (PAL4).	"PAL1"	ATPAL1	PHE ammonia lyase 1	PHE ammonia lyase 1 (PAL1)%3B FUNCTIONS IN: phenylalanine ammonia-lyase activity%3B INVOLVED IN: in 10 processes%3B LOCATED IN: cytoplasm%3B EXPRESSED IN: 22 plant structures%3B EXPRESSED DURING: 13 growth stages%3B CONTAINS InterPro DOMAIN/s: Phenylalanine/histidine ammonia-lyase (InterPro:IPR001106)%2C Phenylalanine/histidine ammonia-lyases%2C active site (InterPro:IPR022313)%2C L-Aspartase-lik…	****	PMID:7888622.PMID:15634198.PMID:16299170.PMID:17158583.PMID:18251883.PMID:18242769.gene:2057980.UniProt:P35510	"PAL1"	'9.2.1.1'	'Secondary metabolism.phenolics.p-coumaroyl-CoA synthesis.phenylalanine ammonia lyase (PAL)'	'Secondary metabolism.phenolics.p-coumaroyl-CoA synthesis.phenylalanine ammonia lyase (PAL) (original description: none)'
Vitvi01g01537	255.738	-2.29784	0.552824	-4.15656	3.23078e-05	0.00219357	255.738	-5.31507	0.663867	-8.00623	1.18277e-15	1.26886e-13	255.738	-2.94742	0.549587	-5.36297	8.18625e-08	1.39509e-06	255.738	-3.71994	0.541323	-6.87194	6.3333e-12	2.75083e-10	VIT_01s0010g02450	AT3G48140.1	3.1e-13	75.1	1-to-1	NA	AT3G48140.1	B12D protein	NA	NA	NA	NA	B12D protein%3B CONTAINS InterPro DOMAIN/s: B12D (InterPro:IPR010530)%3B BEST Arabidopsis thaliana protein match is: B12D protein (TAIR:AT3G29970.1)%3B Has 143 Blast hits to 143 proteins in 25 species: Archae - 0%3B Bacteria - 0%3B Metazoa - 0%3B Fungi - 0%3B Plants - 143%3B Viruses - 0%3B Other Eukaryotes - 0 (source: NCBI BLink).	****	gene:2100483.UniProt:Q42338	NA	'35.2'	'not assigned.not annotated'	' no hits & (original description: none)'
Vitvi04g00510	397.022	-2.33299	0.263809	-8.84351	9.27602e-19	2.24211e-14	397.022	-3.69194	0.316529	-11.6638	1.95085e-31	3.81542e-28	397.022	-3.48611	0.273733	-12.7354	3.75682e-37	2.44728e-33	397.022	-3.13415	0.280325	-11.1804	5.08598e-29	3.15343e-26	VIT_04s0008g05750	AT4G31800.1	5.3e-26	117.5	1-to-many	AT4G31800.2	AT4G31800.1	WRKY DNA-binding protein 18	Pathogen-induced transcription factor. Binds W-box sequences in vitro. Forms protein complexes with itself and with WRKY40 and WRKY60. Constitutive expression of WRKY18 enhanced resistance to P. syringae%2C but its coexpression with WRKY40 or WRKY60 made plants more susceptible to both P. syringae and B. cinerea. WRKY18%2C WRKY40%2C and WRKY60 have partially redundant roles in response to the hem…	"WRKY18"	ATWRKY18.ARABIDOPSIS THALIANA WRKY DNA-BINDING PROTEIN 18	WRKY DNA-binding protein 18	WRKY DNA-binding protein 18 (WRKY18)%3B FUNCTIONS IN: protein binding%2C sequence-specific DNA binding transcription factor activity%3B INVOLVED IN: in 7 processes%3B LOCATED IN: nucleus%3B EXPRESSED IN: 24 plant structures%3B EXPRESSED DURING: 13 growth stages%3B CONTAINS InterPro DOMAIN/s: DNA-binding WRKY (InterPro:IPR003657)%3B BEST Arabidopsis thaliana protein match is: WRKY DNA-binding prot…	****	PMID:10785665.PMID:11118137.PMID:16280546.PMID:17185563.PMID:17096590.PMID:17722694.PMID:18485061.gene:3438911.UniProt:Q9C5T4	"WRKY18"	'15.7.22'	'RNA biosynthesis.transcriptional activation.WRKY transcription factor'	'RNA biosynthesis.transcriptional activation.WRKY transcription factor (original description: none)'
Vitvi15g00178	1133.25	-2.34624	0.457769	-5.12539	2.96922e-07	6.77066e-05	1133.25	-4.71811	0.514838	-9.16425	4.98911e-20	1.15317e-17	1133.25	-2.47011	0.46318	-5.33293	9.6641e-08	1.61121e-06	1133.25	-4.31267	0.457241	-9.43193	4.02606e-21	8.05245e-19	VIT_15s0024g01670	AT4G05200.1	1.2e-61	236.9	1-to-many	AT4G05200.2	AT4G05200.1	cysteine-rich RLK (RECEPTOR-like protein kinase) 25	Encodes a cysteine-rich receptor-like protein kinase.	"CRK25"	NA	cysteine-rich RLK (RECEPTOR-like protein kinase) 25	cysteine-rich RLK (RECEPTOR-like protein kinase) 25 (CRK25)%3B FUNCTIONS IN: kinase activity%3B INVOLVED IN: protein amino acid phosphorylation%3B LOCATED IN: endomembrane system%3B EXPRESSED IN: root%3B CONTAINS InterPro DOMAIN/s: Protein kinase%2C ATP binding site (InterPro:IPR017441)%2C Protein kinase%2C catalytic domain (InterPro:IPR000719)%2C Protein of unknown function DUF26 (InterPro:IPR00…	***	gene:3438468.UniProt:Q9M0X5	NA	'50.2.7'	'Enzyme classification.EC_2 transferases.EC_2.7 transferase transferring phosphorus-containing group'	'Cysteine-rich receptor-like protein kinase 10 OS=Arabidopsis thaliana (sp|q8gya4|crk10_arath : 203.0) & Enzyme classification.EC_2 transferases.EC_2.7 transferase transferring phosphorus-containing group(50.2.7 : 65.3) (original description: none)'
Vitvi18g02468	2585.07	-2.34916	0.462749	-5.07654	3.84372e-07	8.36997e-05	2585.07	-5.72435	0.523111	-10.9429	7.18696e-28	6.09095e-25	2585.07	-3.8483	0.461457	-8.33946	7.46315e-17	9.21646e-15	2585.07	-5.0014	0.464429	-10.7689	4.82608e-27	2.13735e-24	VIT_18s0122g00180	AT5G42380.1	2.2e-40	164.1	1-to-1	NA	AT5G42380.1	calmodulin like 37	NA	"CML37"	AtCML37	calmodulin like 37	calmodulin like 37 (CML37)%3B FUNCTIONS IN: calcium ion binding%3B INVOLVED IN: response to ozone%3B LOCATED IN: chloroplast%3B EXPRESSED IN: 12 plant structures%3B EXPRESSED DURING: 8 growth stages%3B CONTAINS InterPro DOMAIN/s: EF-Hand 1%2C calcium-binding site (InterPro:IPR018247)%2C EF-HAND 2 (InterPro:IPR018249)%2C EF-hand-like domain (InterPro:IPR011992)%2C Calcium-binding EF-hand (InterPro…	*****	PMID:16023399.PMID:17579812.gene:2162325.UniProt:Q9FIH9	NA	'35.1'	'not assigned.annotated'	'Calcium-binding protein CML37 OS=Arabidopsis thaliana (sp|q9fih9|cml37_arath : 121.0)'
Vitvi18g00233	760.909	-2.36739	0.584805	-4.04818	5.16176e-05	0.00306156	760.909	-4.5161	0.659404	-6.84876	7.44931e-12	3.95404e-10	760.909	-2.36544	0.585134	-4.04256	5.28704e-05	0.000425461	760.909	-3.89458	0.587324	-6.63106	3.3329e-11	1.23556e-09	VIT_18s0001g01960	AT1G11050.1	3.1e-176	617.1	1-to-1	NA	AT1G11050.1	Protein kinase superfamily protein	NA	NA	NA	NA	Protein kinase superfamily protein%3B FUNCTIONS IN: kinase activity%3B INVOLVED IN: protein amino acid phosphorylation%3B LOCATED IN: endomembrane system%3B EXPRESSED IN: 18 plant structures%3B EXPRESSED DURING: 10 growth stages%3B CONTAINS InterPro DOMAIN/s: Protein kinase%2C ATP binding site (InterPro:IPR017441)%2C Protein kinase%2C catalytic domain (InterPro:IPR000719)%2C Serine/threonine-prot…	*****	gene:2197413.UniProt:O04086	NA	'18.8.1.23'	'Protein modification.phosphorylation.TKL kinase superfamily.RKF3 kinase'	'Protein modification.phosphorylation.TKL kinase superfamily.RKF3 kinase (original description: none)'
Vitvi04g02205	613.836	-2.38182	0.355233	-6.70495	2.01481e-11	4.45471e-08	613.836	-6.98965	0.469373	-14.8915	3.74488e-50	8.44577e-46	613.836	-2.77083	0.362776	-7.63786	2.20865e-14	1.54706e-12	613.836	-5.66686	0.378587	-14.9684	1.18079e-50	1.46424e-46	VIT_04s0044g00220	AT4G38540.1	2.7e-30	132.1	1-to-1	NA	AT4G38540.1	FAD/NAD(P)-binding oxidoreductase family protein	NA	NA	NA	NA	FAD/NAD(P)-binding oxidoreductase family protein%3B FUNCTIONS IN: monooxygenase activity%3B INVOLVED IN: oxidation reduction%3B EXPRESSED IN: 15 plant structures%3B EXPRESSED DURING: 9 growth stages%3B CONTAINS InterPro DOMAIN/s: Monooxygenase%2C FAD-binding (InterPro:IPR002938)%3B BEST Arabidopsis thaliana protein match is: FAD/NAD(P)-binding oxidoreductase family protein (TAIR:AT5G05320.1)%3B H…	****	PMID:10216258.gene:3438736.UniProt:O81816	NA	'35.1'	'not assigned.annotated'	'Monooxygenase 2 OS=Arabidopsis thaliana (sp|o81816|mo2_arath : 114.0)'
Vitvi18g02191	59.5288	-2.39046	0.569305	-4.19891	2.68204e-05	0.0019011	59.5288	-2.09245	0.603417	-3.46767	0.000524991	0.00406576	59.5288	-5.05915	0.671833	-7.53037	5.05967e-14	3.26336e-12	59.5288	-1.86787	0.529705	-3.52625	0.000421495	0.00276109	GSVIVT00021853001	AT1G71520.1	1.2e-32	138.3	1-to-1	NA	AT1G71520.1	Integrase-type DNA-binding superfamily protein	encodes a member of the DREB subfamily A-5 of ERF/AP2 transcription factor family. The protein contains one AP2 domain. There are 16 members in this subfamily including RAP2.1%2C RAP2.9 and RAP2.10.	NA	NA	NA	Integrase-type DNA-binding superfamily protein%3B CONTAINS InterPro DOMAIN/s: DNA-binding%2C integrase-type (InterPro:IPR016177)%2C Pathogenesis-related transcriptional factor/ERF%2C DNA-binding (InterPro:IPR001471)%3B BEST Arabidopsis thaliana protein match is: Integrase-type DNA-binding superfamily protein (TAIR:AT1G22810.1)%3B Has 4894 Blast hits to 4892 proteins in 218 species: Archae - 0%3B …	*****	PMID:11118137.PMID:16407444.PMID:17722694.gene:3434011.UniProt:Q9C9I8	NA	'15.7.7.2'	'RNA biosynthesis.transcriptional activation.AP2/ERF superfamily.DREB-type transcription factor'	'RNA biosynthesis.transcriptional activation.AP2/ERF superfamily.DREB-type transcription factor (original description: none)'
Vitvi07g02066	818.987	-2.39412	0.557568	-4.29387	1.75584e-05	0.00142947	818.987	-3.33021	0.627298	-5.30882	1.10337e-07	2.55494e-06	818.987	-4.25599	0.563357	-7.5547	4.19838e-14	2.7556e-12	818.987	-3.7778	0.559091	-6.75704	1.40842e-11	5.70754e-10	VIT_07s0141g00690	AT1G50640.1	2.7e-26	117.5	1-to-1	NA	AT1G50640.1	ethylene responsive element binding factor 3	encodes a member of the ERF (ethylene response factor) subfamily B-1 of ERF/AP2 transcription factor family (ATERF-3). The protein contains one AP2 domain. There are 15 members in this subfamily including ATERF-3%2C ATERF-4%2C ATERF-7%2C and leafy petiole.	"ERF3"	ATERF3	ethylene responsive element binding factor 3	ethylene responsive element binding factor 3 (ERF3)%3B CONTAINS InterPro DOMAIN/s: DNA-binding%2C integrase-type (InterPro:IPR016177)%2C Pathogenesis-related transcriptional factor/ERF%2C DNA-binding (InterPro:IPR001471)%3B BEST Arabidopsis thaliana protein match is: ethylene response factor 7 (TAIR:AT3G20310.1)%3B Has 5989 Blast hits to 5713 proteins in 252 species: Archae - 0%3B Bacteria - 0%3B…	*****	PMID:10902919.PMID:10715325.PMID:11118137.PMID:11487705.PMID:16021341.PMID:16280546.PMID:16429262.PMID:16407444.gene:3687857.UniProt:O80339	VviERF9	'15.7.7.1'	'RNA biosynthesis.transcriptional activation.AP2/ERF superfamily.ERF-type transcription factor'	'RNA biosynthesis.transcriptional activation.AP2/ERF superfamily.ERF-type transcription factor (original description: none)'
Vitvi08g00846	490.88	-2.39638	0.616594	-3.88648	0.000101709	0.00512167	490.88	-5.90779	0.715336	-8.25876	1.4719e-16	1.8588e-14	490.88	-4.17246	0.637517	-6.54486	5.95498e-11	2.09169e-09	490.88	-5.69021	0.622855	-9.13568	6.49953e-20	1.10407e-17	VIT_08s0058g01160	AT4G38840.1	0.00028	43.9	1-to-1	NA	AT4G38840.1	SAUR-like auxin-responsive protein family	NA	NA	SAUR14.SMALL AUXIN UPREGULATED RNA 14	NA	SAUR-like auxin-responsive protein family %3B FUNCTIONS IN: molecular_function unknown%3B INVOLVED IN: response to auxin stimulus%2C response to cold%3B LOCATED IN: plasma membrane%3B EXPRESSED IN: 21 plant structures%3B EXPRESSED DURING: 13 growth stages%3B CONTAINS InterPro DOMAIN/s: Auxin responsive SAUR protein (InterPro:IPR003676)%3B BEST Arabidopsis thaliana protein match is: SAUR-like auxi…	*****	PMID:15060130.PMID:16214899.gene:3440196.UniProt:Q9T0J2	NA	'35.2'	'not assigned.not annotated'	' no hits & (original description: none)'
Vitvi05g01909	1071.93	-2.45108	0.508276	-4.82235	1.4188e-06	0.000222783	1071.93	-5.09412	0.558885	-9.1148	7.88132e-20	1.78913e-17	1071.93	-4.09632	0.506232	-8.09178	5.87984e-16	5.72482e-14	1071.93	-4.98853	0.499622	-9.98462	1.77986e-23	4.74648e-21	VIT_05s0020g04990	NA	NA	NA	NA	NA	NA	NA	NA	NA	NA	NA	NA	NA	NA	NA	'35.2'	'not assigned.not annotated'	' no hits & (original description: none)'
Vitvi13g01250	8136.9	-2.45641	0.615535	-3.99069	6.58827e-05	0.00369478	8136.9	-4.26924	0.688857	-6.19758	5.7338e-10	2.19551e-08	8136.9	-4.95423	0.615906	-8.04381	8.70886e-16	8.07569e-14	8136.9	-4.82998	0.616477	-7.83481	4.69535e-15	3.76859e-13	VIT_00s0250g00090	AT2G36690.1	1.5e-77	288.9	1-to-many	AT2G36690.2	AT2G36690.1	2-oxoglutarate (2OG) and Fe(II)-dependent oxygenase superfamily protein	NA	NA	NA	NA	2-oxoglutarate (2OG) and Fe(II)-dependent oxygenase superfamily protein%3B FUNCTIONS IN: oxidoreductase activity%2C acting on paired donors%2C with incorporation or reduction of molecular oxygen%2C 2-oxoglutarate as one donor%2C and incorporation of one atom each of oxygen into both donors%2C oxidoreductase activity%3B INVOLVED IN: biosynthetic process%3B LOCATED IN: cellular_component unknown%3B…	***	gene:2040574.UniProt:F4INZ9	NA	'50.1.13'	'Enzyme classification.EC_1 oxidoreductases.EC_1.14 oxidoreductase acting on paired donor with incorporation or reduction of molecular oxygen'	'Protein DMR6-LIKE OXYGENASE 2 OS=Arabidopsis thaliana (sp|q9zsa7|dlo2_arath : 107.0) & Enzyme classification.EC_1 oxidoreductases.EC_1.14 oxidoreductase acting on paired donor with incorporation or reduction of molecular oxygen(50.1.13 : 100.5) (original description: none)'
Vitvi13g02090	407.821	-2.49906	0.419837	-5.95246	2.64147e-09	1.68018e-06	407.821	-2.85357	0.487872	-5.84901	4.94505e-09	1.53327e-07	407.821	-1.65817	0.417083	-3.97564	7.01904e-05	0.000541912	407.821	-3.46855	0.445721	-7.78189	7.14498e-15	5.41904e-13	VIT_13s0074g00340	NA	NA	NA	NA	NA	NA	NA	NA	NA	NA	NA	NA	NA	NA	NA	'35.2'	'not assigned.not annotated'	' no hits & (original description: none)'
Vitvi15g00844	1589.74	-2.50395	0.401968	-6.22923	4.68722e-10	4.35749e-07	1589.74	-4.55357	0.451451	-10.0865	6.33759e-24	2.73107e-21	1589.74	-3.53048	0.403621	-8.74701	2.19086e-18	3.91009e-16	1589.74	-4.77636	0.402722	-11.8602	1.90551e-32	2.25041e-29	VIT_15s0048g02070	AT2G45760.1	5.3e-26	116.3	1-to-1	NA	AT2G45760.1	BON association protein 2	encodes a protein that is similar to BONZAI1-binding protein BAP1.	"BAP2"	BAL.BON ASSOCIATION PROTEIN 1-LIKE	BON association protein 2	BON association protein 2 (BAP2)%3B CONTAINS InterPro DOMAIN/s: C2 calcium/lipid-binding domain%2C CaLB (InterPro:IPR008973)%2C C2 calcium-dependent membrane targeting (InterPro:IPR000008)%3B BEST Arabidopsis thaliana protein match is: BON association protein 1 (TAIR:AT3G61190.2)%3B Has 35333 Blast hits to 34131 proteins in 2444 species: Archae - 798%3B Bacteria - 22429%3B Metazoa - 974%3B Fungi …	*****	gene:2050781.UniProt:Q58FX0	NA	'35.1'	'not assigned.annotated'	'BON1-associated protein 2 OS=Arabidopsis thaliana (sp|q58fx0|bap2_arath : 115.0)'
Vitvi06g01636	480.818	-2.51109	0.432046	-5.81208	6.17011e-09	3.49627e-06	480.818	-3.29576	0.488463	-6.74721	1.50719e-11	7.60321e-10	480.818	-2.87403	0.442259	-6.49852	8.11138e-11	2.77373e-09	480.818	-3.33654	0.432365	-7.71694	1.19156e-14	8.59329e-13	VIT_06s0004g02250	AT1G05575.1	2.2e-15	80.1	1-to-1	NA	AT1G05575.1	transmembrane protein	NA	NA	NA	NA	unknown protein%3B FUNCTIONS IN: molecular_function unknown%3B INVOLVED IN: anaerobic respiration%3B LOCATED IN: endomembrane system%3B EXPRESSED IN: 17 plant structures%3B EXPRESSED DURING: 9 growth stages%3B BEST Arabidopsis thaliana protein match is: unknown protein (TAIR:AT2G31945.1)%3B Has 63 Blast hits to 63 proteins in 10 species: Archae - 0%3B Bacteria - 0%3B Metazoa - 0%3B Fungi - 0%3B P…	*****	gene:3690488.UniProt:Q8LC91	NA	'35.2'	'not assigned.not annotated'	' no hits & (original description: none)'
Vitvi05g02240	699.165	-2.53289	0.58216	-4.35085	1.3561e-05	0.00120954	699.165	-4.10946	0.655366	-6.27048	3.59937e-10	1.4389e-08	699.165	-2.40964	0.580397	-4.15171	3.30005e-05	0.000284356	699.165	-4.22976	0.583658	-7.24697	4.26196e-13	2.30788e-11	VIT_05s0094g00160	NA	NA	NA	NA	NA	NA	NA	NA	NA	NA	NA	NA	NA	NA	NA	'11.10.1.1.1'	'Phytohormones.signalling peptides.NCRP (non-cysteine-rich-peptide) category.PIP/PIPL family.PIP/PIPL precursor polypeptide'	'Phytohormones.signalling peptides.NCRP (non-cysteine-rich-peptide) category.PIP/PIPL family.PIP/PIPL precursor polypeptide (original description: none)'
Vitvi15g00183	160.569	-2.54544	0.582606	-4.36906	1.24782e-05	0.00115897	160.569	-4.56017	0.737605	-6.18239	6.31365e-10	2.39232e-08	160.569	-2.01597	0.587545	-3.43117	0.000600974	0.00337564	160.569	-4.24635	0.622349	-6.8231	8.90953e-12	3.71996e-10	VIT_15s0024g01700	AT4G05200.1	1e-65	250.4	1-to-many	AT4G05200.2	AT4G05200.1	cysteine-rich RLK (RECEPTOR-like protein kinase) 25	Encodes a cysteine-rich receptor-like protein kinase.	"CRK25"	NA	cysteine-rich RLK (RECEPTOR-like protein kinase) 25	cysteine-rich RLK (RECEPTOR-like protein kinase) 25 (CRK25)%3B FUNCTIONS IN: kinase activity%3B INVOLVED IN: protein amino acid phosphorylation%3B LOCATED IN: endomembrane system%3B EXPRESSED IN: root%3B CONTAINS InterPro DOMAIN/s: Protein kinase%2C ATP binding site (InterPro:IPR017441)%2C Protein kinase%2C catalytic domain (InterPro:IPR000719)%2C Protein of unknown function DUF26 (InterPro:IPR00…	***	gene:3438468.UniProt:Q9M0X5	NA	'50.2.7'	'Enzyme classification.EC_2 transferases.EC_2.7 transferase transferring phosphorus-containing group'	'Cysteine-rich receptor-like protein kinase 10 OS=Arabidopsis thaliana (sp|q8gya4|crk10_arath : 208.0) & Enzyme classification.EC_2 transferases.EC_2.7 transferase transferring phosphorus-containing group(50.2.7 : 66.4) (original description: none)'
Vitvi16g00118	947.288	-2.59511	0.409678	-6.3345	2.38109e-10	2.61606e-07	947.288	-3.66738	0.457544	-8.01537	1.09808e-15	1.18299e-13	947.288	-1.92656	0.409709	-4.70228	2.57273e-06	3.04302e-05	947.288	-3.74259	0.407886	-9.17559	4.49117e-20	7.68175e-18	VIT_16s0039g01870	AT1G34300.1	4.4e-70	263.8	1-to-1	NA	AT1G34300.1	lectin protein kinase family protein	NA	NA	NA	NA	lectin protein kinase family protein%3B FUNCTIONS IN: in 6 functions%3B INVOLVED IN: protein amino acid phosphorylation%2C recognition of pollen%3B LOCATED IN: plasma membrane%3B EXPRESSED IN: 23 plant structures%3B EXPRESSED DURING: 13 growth stages%3B CONTAINS InterPro DOMAIN/s: Curculin-like (mannose-binding) lectin (InterPro:IPR001480)%2C Protein kinase%2C ATP binding site (InterPro:IPR017441…	*****	PMID:17317660.PMID:17644812.PMID:21075962.gene:2026154.UniProt:Q9XID3	NA	'18.8.1.45'	'Protein modification.phosphorylation.TKL kinase superfamily.RLCK-Os kinase'	'Protein modification.phosphorylation.TKL kinase superfamily.RLCK-Os kinase (original description: none)'
Vitvi06g01907	162.293	-2.59573	0.414314	-6.26513	3.72506e-10	3.91471e-07	162.293	-4.70576	0.50011	-9.40945	4.98718e-21	1.30721e-18	162.293	-2.29449	0.422002	-5.43715	5.41407e-08	9.61653e-07	162.293	-5.24958	0.452026	-11.6135	3.52055e-31	3.23382e-28	VIT_06s0009g03540	AT5G05530.1	6.8e-10	62.4	1-to-1	NA	AT5G05530.1	RING/U-box superfamily protein	NA	NA	NA	NA	RING/U-box superfamily protein%3B FUNCTIONS IN: zinc ion binding%3B CONTAINS InterPro DOMAIN/s: Zinc finger%2C RING-type (InterPro:IPR001841)%3B BEST Arabidopsis thaliana protein match is: AtL5 (TAIR:AT3G62690.1)%3B Has 1807 Blast hits to 1807 proteins in 277 species: Archae - 0%3B Bacteria - 0%3B Metazoa - 736%3B Fungi - 347%3B Plants - 385%3B Viruses - 0%3B Other Eukaryotes - 339 (source: NCBI …	*****	gene:2169711.UniProt:Q9FFG2	NA	'19.4.1.5.3.4'	'Protein degradation.peptide tagging.Ubiquitin (UBQ)-anchor addition (ubiquitylation).UBQ-ligase E3 activities.RING-domain E3 ligase activities.RING-H2-type E3 ligase'	'Protein degradation.peptide tagging.Ubiquitin (UBQ)-anchor addition (ubiquitylation).UBQ-ligase E3 activities.RING-domain E3 ligase activities.RING-H2-type E3 ligase (original description: none)'
Vitvi16g02040	167.663	-2.61011	0.426886	-6.11432	9.69701e-10	7.32458e-07	167.663	-3.65022	0.478825	-7.62328	2.47305e-14	2.08894e-12	167.663	-2.60988	0.422373	-6.17908	6.44754e-10	1.838e-08	167.663	-4.62228	0.427846	-10.8036	3.30899e-27	1.51975e-24	VIT_16s0098g00210	AT2G46494.1	1.2e-23	109.4	1-to-1	NA	AT2G46494.1	RING/U-box superfamily protein	NA	NA	NA	NA	RING/U-box superfamily protein%3B FUNCTIONS IN: zinc ion binding%3B LOCATED IN: endomembrane system%3B CONTAINS InterPro DOMAIN/s: Zinc finger%2C RING-type (InterPro:IPR001841)%2C Zinc finger%2C C3HC4 RING-type (InterPro:IPR018957)%3B BEST Arabidopsis thaliana protein match is: RING/U-box superfamily protein (TAIR:AT2G46495.1).	*	gene:6530296912.UniProt:P0CH02	NA	'35.1'	'not assigned.annotated'	'Putative RING-H2 finger protein ATL21B OS=Arabidopsis thaliana (sp|p0ch02|at21b_arath : 111.0)'
Vitvi14g02640	1548.84	-2.6228	0.478359	-5.4829	4.18404e-08	1.48724e-05	1548.84	-3.55875	0.540056	-6.58959	4.41047e-11	2.05754e-09	1548.84	-5.88953	0.481719	-12.2261	2.25606e-34	7.51909e-31	1548.84	-3.01654	0.478607	-6.30274	2.92422e-10	9.00915e-09	VIT_14s0030g01410	AT3G22560.1	4e-45	182.6	1-to-1	NA	AT3G22560.1	Acyl-CoA N-acyltransferases (NAT) superfamily protein	NA	NA	NA	NA	Acyl-CoA N-acyltransferases (NAT) superfamily protein%3B FUNCTIONS IN: N-acetyltransferase activity%3B INVOLVED IN: metabolic process%3B LOCATED IN: membrane%3B EXPRESSED IN: leaf%3B CONTAINS InterPro DOMAIN/s: GCN5-related N-acetyltransferase%2C C-terminal (InterPro:IPR022610)%2C GCN5-related N-acetyltransferase (InterPro:IPR000182)%2C Acyl-CoA N-acyltransferase (InterPro:IPR016181)%3B BEST Arab…	*****	PMID:17432890.gene:2077045.UniProt:Q9LJ90	NA	'35.2'	'not assigned.not annotated'	' no hits & (original description: none)'
Vitvi05g00431	4740.53	-2.63785	0.422909	-6.23739	4.44938e-10	4.30184e-07	4740.53	-5.24298	0.474585	-11.0475	2.25407e-28	2.12259e-25	4740.53	-3.91886	0.424617	-9.22917	2.72731e-20	7.64146e-18	4740.53	-4.97519	0.423976	-11.7346	8.47421e-32	9.13778e-29	VIT_05s0020g02730	AT1G03220.1	1.3e-146	517.7	1-to-1	NA	AT1G03220.1	Eukaryotic aspartyl protease family protein	NA	NA	NA	NA	Eukaryotic aspartyl protease family protein%3B FUNCTIONS IN: aspartic-type endopeptidase activity%3B INVOLVED IN: response to salt stress%3B LOCATED IN: cell wall%2C plasma membrane%2C membrane%2C plant-type cell wall%3B EXPRESSED IN: 6 plant structures%3B CONTAINS InterPro DOMAIN/s: Peptidase aspartic (InterPro:IPR021109)%2C Peptidase aspartic%2C catalytic (InterPro:IPR009007)%2C Peptidase A1 (I…	*****	PMID:11351099.PMID:14595688.PMID:15593128.PMID:16618929.PMID:17432890.PMID:17526915.PMID:17916636.PMID:21166475.gene:2014474.UniProt:Q9ZVS4	NA	'19.5.3.1'	'Protein degradation.peptidase families.aspartic-type peptidase activities.pepsin-type protease'	'Protein degradation.peptidase families.aspartic-type peptidase activities.pepsin-type protease (original description: none)'
Vitvi17g01527	1171.26	-2.644	0.378245	-6.99017	2.74548e-12	1.32722e-08	1171.26	-4.51178	0.427638	-10.5505	5.05447e-26	3.13439e-23	1171.26	-3.42705	0.376489	-9.10267	8.81354e-20	2.25151e-17	1171.26	-4.15486	0.376859	-11.025	2.89667e-28	1.59645e-25	VIT_17s0000g07670	NA	NA	NA	NA	NA	NA	NA	NA	NA	NA	NA	NA	NA	NA	NA	'35.2'	'not assigned.not annotated'	' no hits & (original description: none)'
Vitvi07g02070	473.77	-2.64543	0.475688	-5.56128	2.67809e-08	1.04489e-05	473.77	-3.85841	0.544804	-7.08221	1.41878e-12	8.42814e-11	473.77	-2.56342	0.476908	-5.37508	7.65486e-08	1.31572e-06	473.77	-4.54035	0.483944	-9.38198	6.47481e-21	1.25455e-18	VIT_07s0005g03220	AT3G23230.1	1.2e-27	121.7	1-to-1	NA	AT3G23230.1	Integrase-type DNA-binding superfamily protein	encodes a member of the ERF (ethylene response factor) subfamily B-3 of ERF/AP2 transcription factor family. The protein contains one AP2 domain. There are 18 members in this subfamily including ATERF-1%2C ATERF-2%2C AND ATERF-5.	"TDR1"	AtERF98.AtTDR1.ERF98.Ethylene Response Factor 98	Transcriptional Regulator of Defense Response 1	Integrase-type DNA-binding superfamily protein%3B CONTAINS InterPro DOMAIN/s: DNA-binding%2C integrase-type (InterPro:IPR016177)%2C Pathogenesis-related transcriptional factor/ERF%2C DNA-binding (InterPro:IPR001471)%3B BEST Arabidopsis thaliana protein match is: Integrase-type DNA-binding superfamily protein (TAIR:AT5G43410.1)%3B Has 5843 Blast hits to 5635 proteins in 250 species: Archae - 0%3B …	*****	PMID:9687012.PMID:11118137.PMID:16407444.PMID:17722694.gene:2086212.UniProt:Q9LTC5	VviERF127	'15.7.7.1'	'RNA biosynthesis.transcriptional activation.AP2/ERF superfamily.ERF-type transcription factor'	'RNA biosynthesis.transcriptional activation.AP2/ERF superfamily.ERF-type transcription factor (original description: none)'
Vitvi06g00008	200.02	-2.66475	0.474031	-5.62147	1.89344e-08	8.17256e-06	200.02	-5.21638	0.603458	-8.64414	5.42109e-18	9.06784e-16	200.02	-4.31464	0.495308	-8.71103	3.01129e-18	5.02982e-16	200.02	-4.69467	0.5072	-9.25606	2.12109e-20	3.81197e-18	VIT_06s0004g00030	AT5G56300.1	6.6e-74	276.9	1-to-1	NA	AT5G56300.1	gibberellic acid methyltransferase 2	A member of the Arabidopsis SABATH methyltransferase gene family. Encodes GAMT2%2C a methyltransferase that uses S-adenosine-L-methionine (SAM) as a methyl donor to methylate the carboxyl group of GAs%2C resulting in the methyl esters of GAs (MeGAs). Expressed most highly in the siliques during seed development.	"GAMT2"	NA	gibberellic acid methyltransferase 2	gibberellic acid methyltransferase 2 (GAMT2)%3B CONTAINS InterPro DOMAIN/s: SAM dependent carboxyl methyltransferase (InterPro:IPR005299)%3B BEST Arabidopsis thaliana protein match is: S-adenosyl-L-methionine-dependent methyltransferases superfamily protein (TAIR:AT4G26420.1)%3B Has 919 Blast hits to 907 proteins in 123 species: Archae - 0%3B Bacteria - 67%3B Metazoa - 9%3B Fungi - 5%3B Plants - …	****	PMID:10375393.PMID:17220201.gene:2161007.UniProt:Q5XF78	NA	'50.2.1'	'Enzyme classification.EC_2 transferases.EC_2.1 transferase transferring one-carbon group'	'Gibberellic acid methyltransferase 2 OS=Arabidopsis thaliana (sp|q5xf78|gamt2_arath : 192.0) & Enzyme classification.EC_2 transferases.EC_2.1 transferase transferring one-carbon group(50.2.1 : 99.8) (original description: none)'
Vitvi01g02228	17.6294	-2.68252	0.632812	-4.23904	2.24474e-05	0.00164417	17.6294	-3.22027	0.808779	-3.98165	6.84384e-05	0.000721872	17.6294	-3.02097	0.693714	-4.35478	1.332e-05	0.000129459	17.6294	-3.8677	0.808081	-4.78628	1.69899e-06	2.27274e-05	VIT_01s0010g02930	AT3G50770.1	0.00062	42.7	1-to-1	NA	AT3G50770.1	calmodulin-like 41	NA	"CML41"	NA	calmodulin-like 41	calmodulin-like 41 (CML41)%3B FUNCTIONS IN: calcium ion binding%3B INVOLVED IN: biological_process unknown%3B LOCATED IN: chloroplast%3B EXPRESSED IN: 17 plant structures%3B EXPRESSED DURING: 11 growth stages%3B CONTAINS InterPro DOMAIN/s: EF-Hand 1%2C calcium-binding site (InterPro:IPR018247)%2C EF-HAND 2 (InterPro:IPR018249)%2C EF-hand-like domain (InterPro:IPR011992)%2C Calcium-binding EF-hand…	*****	PMID:16023399.gene:2078016.UniProt:Q8L3R2	NA	'35.1'	'not assigned.annotated'	'Probable calcium-binding protein CML31 OS=Oryza sativa subsp. japonica (sp|q8ryk0|cml31_orysj : 135.0)'
Vitvi04g01796	24.051	-2.71033	0.710531	-3.81451	0.000136452	0.00630628	24.051	-5.45229	1.02406	-5.3242	1.01396e-07	2.36948e-06	24.051	-2.24602	0.574886	-3.90689	9.34926e-05	0.000694478	24.051	-4.73484	0.822076	-5.75962	8.43031e-09	1.89556e-07	VIT_04s0008g01530	AT5G12020.1	3.3e-54	209.9	1-to-1	NA	AT5G12020.1	17.6 kDa class II heat shock protein	NA	"HSP17.6II"	NA	17.6 kDa class II heat shock protein	17.6 kDa class II heat shock protein (HSP17.6II)%3B CONTAINS InterPro DOMAIN/s: Heat shock protein Hsp20 (InterPro:IPR002068)%2C HSP20-like chaperone (InterPro:IPR008978)%3B BEST Arabidopsis thaliana protein match is: heat shock protein 17.6A (TAIR:AT5G12030.1)%3B Has 1807 Blast hits to 1807 proteins in 277 species: Archae - 0%3B Bacteria - 0%3B Metazoa - 736%3B Fungi - 347%3B Plants - 385%3B Vir…	*****	PMID:1581560.gene:2143108.UniProt:P29830	NA	'26.3.2.5.2'	'External stimuli response.temperature.Hsp (heat-shock-responsive protein) families.sHsp (small heat-shock-responsive protein) families.class-C-II protein'	'External stimuli response.temperature.Hsp (heat-shock-responsive protein) families.sHsp (small heat-shock-responsive protein) families.class-C-II protein (original description: none)'
Vitvi16g02041	717.341	-2.73632	0.378435	-7.23062	4.80796e-13	2.90533e-09	717.341	-3.4808	0.428509	-8.12306	4.54572e-16	5.35069e-14	717.341	-2.41129	0.378491	-6.37078	1.88065e-10	5.91122e-09	717.341	-3.30101	0.378454	-8.72235	2.72483e-18	3.53814e-16	VIT_16s0098g00220	NA	NA	NA	NA	NA	NA	NA	NA	NA	NA	NA	NA	NA	NA	NA	'35.2'	'not assigned.not annotated'	' no hits & (original description: none)'
Vitvi17g01335	55.0749	-2.84147	0.698654	-4.06707	4.76089e-05	0.00289863	55.0749	-3.71591	0.758986	-4.89588	9.78644e-07	1.77475e-05	55.0749	-4.18506	0.686605	-6.09529	1.09236e-09	2.9344e-08	55.0749	-5.24026	0.733825	-7.14102	9.26415e-13	4.73733e-11		AT5G50760.1	1.4e-20	98.2	1-to-1	NA	AT5G50760.1	SAUR-like auxin-responsive protein family	NA	NA	SAUR55.SMALL AUXIN UPREGULATED RNA 55	NA	SAUR-like auxin-responsive protein family %3B CONTAINS InterPro DOMAIN/s: Auxin responsive SAUR protein (InterPro:IPR003676)%3B BEST Arabidopsis thaliana protein match is: SAUR-like auxin-responsive protein family (TAIR:AT3G43120.1)%3B Has 1807 Blast hits to 1807 proteins in 277 species: Archae - 0%3B Bacteria - 0%3B Metazoa - 736%3B Fungi - 347%3B Plants - 385%3B Viruses - 0%3B Other Eukaryotes …	*****	gene:2163309.UniProt:Q9LUE5	NA	'35.2'	'not assigned.not annotated'	' no hits & (original description: none)'
Vitvi07g00455	210.06	-2.91897	0.649633	-4.49326	7.01419e-06	0.000770637	210.06	-6.18976	0.782975	-7.90544	2.66989e-15	2.63108e-13	210.06	-2.13456	0.637719	-3.34719	0.000816362	0.00435454	210.06	-4.66223	0.663957	-7.02189	2.18893e-12	1.03999e-10	VIT_07s0005g01950	AT5G49620.1	2.2e-32	137.9	1-to-many	AT5G49620.2	AT5G49620.1	myb domain protein 78	Member of the R2R3 factor gene family.	"MYB78"	AtMYB78.myb domain protein 78	myb domain protein 78	myb domain protein 78 (MYB78)%3B CONTAINS InterPro DOMAIN/s: SANT%2C DNA-binding (InterPro:IPR001005)%2C Homeodomain-like (InterPro:IPR009057)%2C Myb%2C DNA-binding (InterPro:IPR014778)%2C HTH transcriptional regulator%2C Myb-type%2C DNA-binding (InterPro:IPR017930)%2C Homeodomain-related (InterPro:IPR012287)%2C Myb transcription factor (InterPro:IPR015495)%3B BEST Arabidopsis thaliana protein ma…	****	PMID:11118137.PMID:16258012.PMID:16280546.PMID:16463103.gene:2157843.UniProt:Q9FGY3	"VviMYB108B"	'35.1'	'not assigned.annotated'	'Transcription factor MYB108 OS=Arabidopsis thaliana (sp|q9lde1|my108_arath : 150.0)'
Vitvi19g00109	7548.98	-2.93951	0.442743	-6.63933	3.15116e-11	6.34722e-08	7548.98	-3.91611	0.495882	-7.89727	2.85071e-15	2.77699e-13	7548.98	-5.50802	0.444609	-12.3885	3.01808e-35	1.3107e-31	7548.98	-3.5189	0.442929	-7.9446	1.94813e-15	1.67762e-13	VIT_19s0014g01360	AT1G78830.1	1.2e-147	521.5	1-to-1	NA	AT1G78830.1	Curculin-like (mannose-binding) lectin family protein	NA	NA	NA	NA	Curculin-like (mannose-binding) lectin family protein%3B FUNCTIONS IN: sugar binding%3B LOCATED IN: apoplast%2C cell wall%2C plasma membrane%2C plant-type cell wall%3B EXPRESSED IN: leaf%3B CONTAINS InterPro DOMAIN/s: Curculin-like (mannose-binding) lectin (InterPro:IPR001480)%2C PAN-2 domain (InterPro:IPR013227)%3B BEST Arabidopsis thaliana protein match is: D-mannose binding lectin protein with…	*****	PMID:15593128.PMID:16287169.PMID:17317660.PMID:18324730.PMID:18538804.PMID:21166475.gene:2037547.UniProt:Q9ZVA2	NA	'35.1'	'not assigned.annotated'	'EP1-like glycoprotein 2 OS=Arabidopsis thaliana (sp|q9zva2|ep1l2_arath : 566.0)'
Vitvi12g02307	285.379	-3.15962	0.688434	-4.58958	4.44149e-06	0.000539473	285.379	-5.97272	0.807882	-7.39305	1.43494e-13	1.04537e-11	285.379	-6.2587	0.725365	-8.62834	6.22493e-18	9.3759e-16	285.379	-5.97884	0.71539	-8.35746	6.40821e-17	6.88008e-15	VIT_12s0028g03550	AT4G20970.1	9.8e-14	76.3	1-to-1	NA	AT4G20970.1	basic helix-loop-helix (bHLH) DNA-binding superfamily protein	NA	NA	NA	NA	basic helix-loop-helix (bHLH) DNA-binding superfamily protein%3B FUNCTIONS IN: DNA binding%2C sequence-specific DNA binding transcription factor activity%3B INVOLVED IN: defense response to fungus%2C regulation of transcription%3B LOCATED IN: nucleus%3B CONTAINS InterPro DOMAIN/s: Helix-loop-helix DNA-binding domain (InterPro:IPR001092)%2C Helix-loop-helix DNA-binding (InterPro:IPR011598)%3B BEST…	****	PMID:11118137.PMID:12679534.gene:2133088.UniProt:F4JIJ7	NA	'35.2'	'not assigned.not annotated'	' no hits & (original description: none)'
Vitvi11g01351	264.945	-3.26011	0.480578	-6.78373	1.17116e-11	3.38886e-08	264.945	-4.443	0.847174	-5.24449	1.56713e-07	3.48289e-06	264.945	-3.92525	0.486431	-8.06949	7.05904e-16	6.78736e-14	264.945	-3.77873	0.703263	-5.37314	7.73793e-08	1.40811e-06	VIT_11s0016g01550	AT1G14480.1	1.5e-06	52.4	1-to-many	AT1G14480.2	AT1G14480.1	Ankyrin repeat family protein	NA	NA	NA	NA	Ankyrin repeat family protein%3B CONTAINS InterPro DOMAIN/s: Ankyrin repeat-containing domain (InterPro:IPR020683)%2C Ankyrin repeat (InterPro:IPR002110)%3B BEST Arabidopsis thaliana protein match is: Ankyrin repeat family protein (TAIR:AT1G14500.1)%3B Has 8895 Blast hits to 5065 proteins in 313 species: Archae - 10%3B Bacteria - 564%3B Metazoa - 4493%3B Fungi - 246%3B Plants - 1339%3B Viruses - …	****	gene:2012531.UniProt:Q9M9R5	NA	'35.1'	'not assigned.annotated'	'Ankyrin repeat-containing protein BDA1 OS=Arabidopsis thaliana (sp|q8gyh5|bad1_arath : 90.1)'
Vitvi04g01237	184.575	-3.27272	0.580237	-5.64032	1.69738e-08	7.58703e-06	184.575	-3.36312	0.629324	-5.34403	9.0905e-08	2.14204e-06	184.575	-2.37498	0.691465	-3.43471	0.000593193	0.00333697	184.575	-5.26819	0.563484	-9.34931	8.82203e-21	1.65754e-18	VIT_04s0023g01290	AT3G50740.1	3.1e-137	486.9	1-to-1	NA	AT3G50740.1	UDP-glucosyl transferase 72E1	UGT72E1 is an UDPG:coniferyl alcohol glucosyltransferase which specifically glucosylates sinapyl- and coniferyl aldehydes. The enzyme is thought to be involved in lignin metabolism.	"UGT72E1"	NA	UDP-glucosyl transferase 72E1	UDP-glucosyl transferase 72E1 (UGT72E1)%3B CONTAINS InterPro DOMAIN/s: UDP-glucuronosyl/UDP-glucosyltransferase (InterPro:IPR002213)%3B BEST Arabidopsis thaliana protein match is: UDP-Glycosyltransferase superfamily protein (TAIR:AT5G66690.1)%3B Has 8063 Blast hits to 8012 proteins in 453 species: Archae - 0%3B Bacteria - 455%3B Metazoa - 2482%3B Fungi - 35%3B Plants - 4969%3B Viruses - 57%3B Oth…	*****	PMID:15907484.PMID:16995900.PMID:18563437.gene:3698438.UniProt:Q94A84	NA	'50.2.4'	'Enzyme classification.EC_2 transferases.EC_2.4 glycosyltransferase'	'Anthocyanidin 3-O-glucosyltransferase 5 OS=Manihot esculenta (sp|q40287|ufog5_manes : 525.0) & Enzyme classification.EC_2 transferases.EC_2.4 glycosyltransferase(50.2.4 : 358.4) (original description: none)'
Vitvi01g00344	209.788	-3.28612	0.767766	-4.28011	1.868e-05	0.00149009	209.788	-4.56515	0.903067	-5.05516	4.3002e-07	8.70363e-06	209.788	-6.46514	0.809542	-7.98617	1.39193e-15	1.255e-13	209.788	-5.7162	0.837629	-6.82427	8.83755e-12	3.69612e-10	VIT_01s0011g04220	AT2G01760.2	4.6e-09	62	1-to-1	NA	AT2G01760.2	response regulator 14	NA	"RR14"	ARR14.response regulator 14	response regulator 14	NA	NA	NA	NA	'35.2'	'not assigned.not annotated'	' no hits & (original description: none)'
Vitvi14g01156	63.0636	-3.34358	0.834087	-4.00867	6.10628e-05	0.00350542	63.0636	-4.60695	0.878222	-5.24577	1.55634e-07	3.46497e-06	63.0636	-3.13127	0.719737	-4.35058	1.35779e-05	0.000131573	63.0636	-4.23914	0.79459	-5.335	9.55451e-08	1.69258e-06	VIT_14s0006g02700	AT5G16170.1	6.3e-92	336.3	1-to-1	NA	AT5G16170.1	Core-2/I-branching beta-1%2C6-N-acetylglucosaminyltransferase family protein	NA	NA	NA	NA	Core-2/I-branching beta-1%2C6-N-acetylglucosaminyltransferase family protein%3B CONTAINS InterPro DOMAIN/s: Core-2/I-Branching enzyme (InterPro:IPR021141)%3B BEST Arabidopsis thaliana protein match is: Core-2/I-branching beta-1%2C6-N-acetylglucosaminyltransferase family protein (TAIR:AT5G11730.1)%3B Has 580 Blast hits to 580 proteins in 21 species: Archae - 0%3B Bacteria - 5%3B Metazoa - 0%3B Fun…	****	gene:2181441.UniProt:Q4V3A2	NA	'35.2'	'not assigned.not annotated'	' no hits & (original description: none)'
Vitvi02g00407	120.729	-3.52295	0.853421	-4.12803	3.65876e-05	0.00235202	120.729	-3.29222	0.942074	-3.49465	0.000474687	0.0037342	120.729	-5.7764	0.844398	-6.84084	7.8729e-12	3.33026e-10	120.729	-3.2075	0.843704	-3.80169	0.000143711	0.0010853	VIT_02s0025g04460	AT1G63030.1	9.8e-48	188.7	1-to-many	AT1G63030.2	AT1G63030.1	Integrase-type DNA-binding superfamily protein	encodes a member of the DREB subfamily A-1 of ERF/AP2 transcription factor family (DDF2). The protein contains one AP2 domain. There are six members in this subfamily%2C including CBF1%2C CBF2%2C and CBF3. Overexpression of this gene results in the reduction of gibberellic acid biosynthesis. This gene is expressed in all tissues examined%2C but most abundantly expressed in rosette leaves and stem…	"ddf2"	NA	DWARF AND DELAYED FLOWERING 2	DWARF AND DELAYED FLOWERING 2 (ddf2)%3B CONTAINS InterPro DOMAIN/s: DNA-binding%2C integrase-type (InterPro:IPR016177)%2C Pathogenesis-related transcriptional factor/ERF%2C DNA-binding (InterPro:IPR001471)%3B BEST Arabidopsis thaliana protein match is: Integrase-type DNA-binding superfamily protein (TAIR:AT1G12610.1)%3B Has 5240 Blast hits to 5238 proteins in 236 species: Archae - 0%3B Bacteria -…	*****	PMID:11118137.PMID:16407444.gene:3433282.UniProt:Q9SGJ6	VviDDF2	'26.3.4.2'	'External stimuli response.temperature.ICE-CBF cold acclimation transcriptional cascade.CBF/DREB1 transcription factor'	'External stimuli response.temperature.ICE-CBF cold acclimation transcriptional cascade.CBF/DREB1 transcription factor (original description: none)'
Vitvi05g01722	96.9179	-4.16255	0.715692	-5.81612	6.02287e-09	3.49627e-06	96.9179	-3.82746	0.803919	-4.761	1.92635e-06	3.1987e-05	96.9179	-4.65129	0.745076	-6.2427	4.30083e-10	1.26059e-08	96.9179	-3.05659	0.689411	-4.43363	9.26611e-06	0.000101595	VIT_05s0049g00490	AT3G23220.1	1.6e-30	131	1-to-1	NA	AT3G23220.1	Integrase-type DNA-binding superfamily protein	encodes a member of the ERF (ethylene response factor) subfamily B-3 of ERF/AP2 transcription factor family. The protein contains one AP2 domain. There are 18 members in this subfamily including ATERF-1%2C ATERF-2%2C AND ATERF-5.	"ESE1"	NA	ethylene and salt inducible 1	Integrase-type DNA-binding superfamily protein%3B CONTAINS InterPro DOMAIN/s: DNA-binding%2C integrase-type (InterPro:IPR016177)%2C Pathogenesis-related transcriptional factor/ERF%2C DNA-binding (InterPro:IPR001471)%3B BEST Arabidopsis thaliana protein match is: Integrase-type DNA-binding superfamily protein (TAIR:AT3G23230.1)%3B Has 5797 Blast hits to 5590 proteins in 248 species: Archae - 0%3B …	*****	PMID:10715325.PMID:9687012.PMID:11118137.PMID:16407444.gene:2086202.UniProt:Q9LTC6	VviERF096L1	'15.7.7.1'	'RNA biosynthesis.transcriptional activation.AP2/ERF superfamily.ERF-type transcription factor'	'RNA biosynthesis.transcriptional activation.AP2/ERF superfamily.ERF-type transcription factor (original description: none)'
