# Supplementary material for: Scion genotypes exert long distance control over rootstock transcriptome responses to low phosphate in grafted grapevine
Source: BMC Plant Biol. 2020 Aug 3;20:367. doi: 10.1186/s12870-020-02578-y (PMC7398338; doi:10.1186/s12870-020-02578-y)
Supplement: Supplementary file 2 — Additional file 2. Genes differentially expressed between the roots of two grapevine genotypes grown grafted under high or low phosphate supply (HP and LP respectively). [file 12870_2020_2578_MOESM2_ESM.xlsx]

## Sheet: C9_1103P_PN.LP vs 1103P_1103P.L
Additional File 2. Genes differentially expressed between the roots of two grapevine genotypes grown grafted under high or low phosphate supply (HP and LP respectively). PN: Vitis vinifera cv. Pinot noir; 1103P: V. rupestris x V. berlandieri cv. 1103 Paulsen.
	1103P/PN - 1103P/1103P LP						1103P/PN - 1103P/1103P HP						PN/PN - PN/1103P LP						PN/PN - PN/1103P HP							Araport11 Annotation															MapMan Annotation from Mercator 4
V3 gene identifier	baseMean	log2 Fold Change	Standard error	stat	p-value	Adjusted p-values	baseMean	log2 Fold Change	Standard error	stat	p-value	Adjusted p-values	baseMean	log2 Fold Change	Standard error	stat	p-value	Adjusted p-values	baseMean	log2 Fold Change	Standard error	stat	p-value	Adjusted p-values	V1 gene identifier	Ara11.sseqid	Ara11.evalue	Ara11.bitscore	Ara11.hit.nb	Ara11.other.hits	Ara11.Name	Ara11.Note	Ara11.curator_summary	Ara11.symbol	Ara11.Alias	Ara11.full_name	Ara11.computational_description	Ara11.conf_rating	Ara11.Dbxref	manual	BINCODE	NAME	DESCRIPTION
Vitvi00g00338	0	NA	NA	NA	NA	NA	0	NA	NA	NA	NA	NA	0	NA	NA	NA	NA	NA	0	NA	NA	NA	NA	NA		NA	NA	NA	NA	NA	NA	NA	NA	NA	NA	NA	NA	NA	NA	NA	'35.2'	'not assigned.not annotated'	' no hits & (original description: none)'
Vitvi00g00339	0	NA	NA	NA	NA	NA	0	NA	NA	NA	NA	NA	0	NA	NA	NA	NA	NA	0	NA	NA	NA	NA	NA	VIT_00s0266g00010	AT1G61680.1	1.6e-54	213	1-to-many	AT1G61680.2	AT1G61680.1	terpene synthase 14	NA	"TPS14"	ATTPS14.TERPENE SYNTHASE 14	terpene synthase 14	terpene synthase 14 (TPS14)%3B CONTAINS InterPro DOMAIN/s: Terpene synthase%2C metal-binding domain (InterPro:IPR005630)%2C Terpenoid synthase (InterPro:IPR008949)%2C Terpenoid cylases/protein prenyltransferase alpha-alpha toroid (InterPro:IPR008930)%2C Terpene synthase-like (InterPro:IPR001906)%3B BEST Arabidopsis thaliana protein match is: terpene synthase 02 (TAIR:AT4G16730.1)%3B Has 1701 Blas…	*****	PMID:9614092.gene:2195767.UniProt:Q84UV0	"VviTPS53"	'9.1.3.1'	'Secondary metabolism.terpenoids.terpenoid synthesis.mono-/sesquiterpene-/diterpene synthase'	'Secondary metabolism.terpenoids.terpenoid synthesis.mono-/sesquiterpene-/diterpene synthase (original description: none)'
Vitvi00g00340	0	NA	NA	NA	NA	NA	0	NA	NA	NA	NA	NA	0	NA	NA	NA	NA	NA	0	NA	NA	NA	NA	NA	VIT_00s0266g00030	AT1G11340.3	2.3e-46	185.3	1-to-1	NA	AT1G11340.3	G-type lectin S-receptor-like Serine/Threonine-kinase	NA	NA	NA	NA	NA	NA	NA	NA	'50.2.7'	'Enzyme classification.EC_2 transferases.EC_2.7 transferase transferring phosphorus-containing group'	'G-type lectin S-receptor-like serine/threonine-protein kinase RKS1 OS=Arabidopsis thaliana (sp|q9zt07|rks1_arath : 171.0) & Enzyme classification.EC_2 transferases.EC_2.7 transferase transferring phosphorus-containing group(50.2.7 : 47.8) (original description: none)'
Vitvi00g00341	0	NA	NA	NA	NA	NA	0	NA	NA	NA	NA	NA	0	NA	NA	NA	NA	NA	0	NA	NA	NA	NA	NA	GSVIVT01005219001	AT1G61680.1	5.6e-28	123.2	1-to-many	AT1G61680.1.AT1G61680.2.AT1G61680.2	AT1G61680.1	terpene synthase 14	NA	"TPS14"	ATTPS14.TERPENE SYNTHASE 14	terpene synthase 14	terpene synthase 14 (TPS14)%3B CONTAINS InterPro DOMAIN/s: Terpene synthase%2C metal-binding domain (InterPro:IPR005630)%2C Terpenoid synthase (InterPro:IPR008949)%2C Terpenoid cylases/protein prenyltransferase alpha-alpha toroid (InterPro:IPR008930)%2C Terpene synthase-like (InterPro:IPR001906)%3B BEST Arabidopsis thaliana protein match is: terpene synthase 02 (TAIR:AT4G16730.1)%3B Has 1701 Blas…	*****	PMID:9614092.gene:2195767.UniProt:Q84UV0	"VviTPS147"	'50.4.2'	'Enzyme classification.EC_4 lyases.EC_4.2 carbon-oxygen lyase'	'Probable terpene synthase 4 OS=Ricinus communis (sp|b9rhx7|tps4_ricco : 137.0) & Enzyme classification.EC_4 lyases.EC_4.2 carbon-oxygen lyase(50.4.2 : 54.2) (original description: none)'
Vitvi00g00342	0	NA	NA	NA	NA	NA	0	NA	NA	NA	NA	NA	0	NA	NA	NA	NA	NA	0	NA	NA	NA	NA	NA	VIT_00s0266g00090	AT1G11340.3	1.8e-49	195.7	1-to-1	NA	AT1G11340.3	G-type lectin S-receptor-like Serine/Threonine-kinase	NA	NA	NA	NA	NA	NA	NA	NA	'50.2.7'	'Enzyme classification.EC_2 transferases.EC_2.7 transferase transferring phosphorus-containing group'	'G-type lectin S-receptor-like serine/threonine-protein kinase RKS1 OS=Arabidopsis thaliana (sp|q9zt07|rks1_arath : 179.0) & Enzyme classification.EC_2 transferases.EC_2.7 transferase transferring phosphorus-containing group(50.2.7 : 53.2) (original description: none)'
Vitvi00g00343	0	NA	NA	NA	NA	NA	0	NA	NA	NA	NA	NA	0	NA	NA	NA	NA	NA	0	NA	NA	NA	NA	NA		AT1G48120.1	1.7e-71	270.8	1-to-1	NA	AT1G48120.1	serine/threonine-protein phosphatase 7 long form-like protein	NA	NA	MAIL3.MAIN-LIKE 3	NA	hydrolases%3Bprotein serine/threonine phosphatases%3B FUNCTIONS IN: hydrolase activity%2C protein serine/threonine phosphatase activity%3B INVOLVED IN: biological_process unknown%3B LOCATED IN: cellular_component unknown%3B EXPRESSED IN: 21 plant structures%3B EXPRESSED DURING: 12 growth stages%3B CONTAINS InterPro DOMAIN/s: Metallophosphoesterase (InterPro:IPR004843)%2C Aminotransferase-like%2C …	**	gene:2023791.UniProt:Q9LNG5	NA	'50.2.7'	'Enzyme classification.EC_2 transferases.EC_2.7 transferase transferring phosphorus-containing group'	'Serine/threonine-protein phosphatase 7 long form homolog OS=Arabidopsis thaliana (sp|q9lng5|ppp7l_arath : 246.0) & Enzyme classification.EC_2 transferases.EC_2.7 transferase transferring phosphorus-containing group(50.2.7 : 27.4) (original description: none)'
Vitvi00g00441	0.0404055	0	6.58482	0	1	NA	0.0404055	0	5.88922	0	1	NA	0.0404055	0	5.88968	0	1	NA	0.0404055	0.836044	5.88968	0.141951	0.887119	NA		NA	NA	NA	NA	NA	NA	NA	NA	NA	NA	NA	NA	NA	NA	NA	'35.2'	'not assigned.not annotated'	' no hits & (original description: none)'
Vitvi00g00442	0.737149	4.15471	3.293	1.26168	0.207064	NA	0.737149	3.00455	3.04176	0.987768	0.323266	NA	0.737149	2.01584	3.15536	0.638862	0.522913	0.630703	0.737149	1.6116	3.13953	0.513326	0.607723	NA		NA	NA	NA	NA	NA	NA	NA	NA	NA	NA	NA	NA	NA	NA	NA	'35.2'	'not assigned.not annotated'	' no hits & (original description: none)'
Vitvi00g00443	19.187	-4.23756	0.924206	-4.58509	4.538e-06	3.51271e-05	19.187	-6.09473	1.23119	-4.95028	7.41076e-07	4.74887e-06	19.187	-6.72928	1.22601	-5.48875	4.04778e-08	2.90089e-07	19.187	-5.92808	1.07243	-5.52768	3.24484e-08	2.51524e-07	VIT_00s0319g00060	AT3G54720.1	4.2e-33	142.9	1-to-1	NA	AT3G54720.1	Peptidase M28 family protein	Encodes glutamate carboxypeptidase. Various alleles show-increased cotyledon number and rate of leaf initiation%2C show transformation of leaves to cotyledons%2C altered flowering time and photomorphogenesis and an increased level of cytokinin biosynthesis. Involved in ethylene enhanced hypocotyl elongation in the light. Strong genetic interaction between TGH and AMP1.	"AMP1"	AtAMP1.COP2.CONSTITUTIVE MORPHOGENESIS 2.HPT.HAUPTLING.MFO1.Multifolia.PT.PRIMORDIA TIMING	ALTERED MERISTEM PROGRAM 1	ALTERED MERISTEM PROGRAM 1 (AMP1)%3B CONTAINS InterPro DOMAIN/s: Protease-associated PA (InterPro:IPR003137)%2C Transferrin receptor-like%2C dimerisation (InterPro:IPR007365)%2C Peptidase M28 (InterPro:IPR007484)%3B BEST Arabidopsis thaliana protein match is: Peptidase M28 family protein (TAIR:AT5G19740.1)%3B Has 3363 Blast hits to 3338 proteins in 594 species: Archae - 10%3B Bacteria - 1310%3B M…	****	PMID:11549767.gene:2102469.UniProt:Q9M1S8	NA	'19.5.5.7.3'	'Protein degradation.peptidase families.metallopeptidase activities.carboxypeptidase activities.M28 carboxypeptidase'	'Protein degradation.peptidase families.metallopeptidase activities.carboxypeptidase activities.M28 carboxypeptidase (original description: none)'
Vitvi00g00444	23.0964	-4.32335	1.18408	-3.65122	0.000261001	0.00129439	23.0964	-7.05891	1.4531	-4.85783	1.18682e-06	7.33846e-06	23.0964	-5.83243	1.19525	-4.87969	1.06255e-06	5.96742e-06	23.0964	-3.78463	0.993551	-3.8092	0.000139418	0.000522916	VIT_00s0327g00020	AT3G54720.1	3.8e-34	146.4	1-to-1	NA	AT3G54720.1	Peptidase M28 family protein	Encodes glutamate carboxypeptidase. Various alleles show-increased cotyledon number and rate of leaf initiation%2C show transformation of leaves to cotyledons%2C altered flowering time and photomorphogenesis and an increased level of cytokinin biosynthesis. Involved in ethylene enhanced hypocotyl elongation in the light. Strong genetic interaction between TGH and AMP1.	"AMP1"	AtAMP1.COP2.CONSTITUTIVE MORPHOGENESIS 2.HPT.HAUPTLING.MFO1.Multifolia.PT.PRIMORDIA TIMING	ALTERED MERISTEM PROGRAM 1	ALTERED MERISTEM PROGRAM 1 (AMP1)%3B CONTAINS InterPro DOMAIN/s: Protease-associated PA (InterPro:IPR003137)%2C Transferrin receptor-like%2C dimerisation (InterPro:IPR007365)%2C Peptidase M28 (InterPro:IPR007484)%3B BEST Arabidopsis thaliana protein match is: Peptidase M28 family protein (TAIR:AT5G19740.1)%3B Has 3363 Blast hits to 3338 proteins in 594 species: Archae - 10%3B Bacteria - 1310%3B M…	****	PMID:11549767.gene:2102469.UniProt:Q9M1S8	NA	'19.5.5.7.3'	'Protein degradation.peptidase families.metallopeptidase activities.carboxypeptidase activities.M28 carboxypeptidase'	'Protein degradation.peptidase families.metallopeptidase activities.carboxypeptidase activities.M28 carboxypeptidase (original description: none)'
Vitvi00g00446	0	NA	NA	NA	NA	NA	0	NA	NA	NA	NA	NA	0	NA	NA	NA	NA	NA	0	NA	NA	NA	NA	NA		AT5G61530.1	2.4e-23	107.8	1-to-many	AT5G61530.3	AT5G61530.1	small G protein family protein / RhoGAP family protein	NA	NA	NA	NA	small G protein family protein / RhoGAP family protein%3B FUNCTIONS IN: Rho GTPase activator activity%3B INVOLVED IN: signal transduction%3B LOCATED IN: intracellular%3B EXPRESSED IN: 24 plant structures%3B EXPRESSED DURING: 15 growth stages%3B CONTAINS InterPro DOMAIN/s: Rho GTPase activation protein (InterPro:IPR008936)%2C RhoGAP (InterPro:IPR000198)%3B Has 30201 Blast hits to 17322 proteins in…	****	gene:2151610.UniProt:Q3E875	NA	'35.1'	'not assigned.annotated'	'Uncharacterized Rho GTPase-activating protein At5g61530 OS=Arabidopsis thaliana (sp|q3e875|rgapx_arath : 110.0)'
Vitvi00g00447	0.656157	-2.72884	2.46012	-1.10923	0.26733	NA	0.656157	1.07651	2.3856	0.451254	0.651807	NA	0.656157	2.38593	2.19222	1.08836	0.276435	0.384518	0.656157	-1.49318	2.24873	-0.664011	0.506683	NA		AT1G13440.1	6e-08	58.2	1-to-many	AT1G13440.2	AT1G13440.1	glyceraldehyde-3-phosphate dehydrogenase C2	NA	"GAPC2"	GAPC-2.GLYCERALDEHYDE-3-PHOSPHATE DEHYDROGENASE C-2	glyceraldehyde-3-phosphate dehydrogenase C2	glyceraldehyde-3-phosphate dehydrogenase C2 (GAPC2)%3B FUNCTIONS IN: copper ion binding%2C glyceraldehyde-3-phosphate dehydrogenase activity%2C zinc ion binding%3B INVOLVED IN: response to oxidative stress%2C response to cadmium ion%2C gluconeogenesis%2C defense response to bacterium%2C glycolysis%3B LOCATED IN: in 8 components%3B EXPRESSED IN: 27 plant structures%3B EXPRESSED DURING: 15 growth s…	****	PMID:12492832.PMID:12953116.PMID:14617066.PMID:14671022.PMID:15028209.PMID:15060130.PMID:15496452.PMID:15971193.PMID:16247729.PMID:16287169.PMID:16502469.PMID:17075075.PMID:17028151.PMID:17317660.PMID:17432890.PMID:18298409.PMID:18431481.PMID:23289948.gene:3435846.UniProt:Q9FX54	NA	'35.2'	'not assigned.not annotated'	' no hits & (original description: none)'
Vitvi00g00448	0	NA	NA	NA	NA	NA	0	NA	NA	NA	NA	NA	0	NA	NA	NA	NA	NA	0	NA	NA	NA	NA	NA		NA	NA	NA	NA	NA	NA	NA	NA	NA	NA	NA	NA	NA	NA	NA	'35.1'	'not assigned.annotated'	'Retrovirus-related Pol polyprotein from transposon RE2 OS=Arabidopsis thaliana (sp|q9zt94|polr2_arath : 85.5)'
Vitvi00g00449	0.766469	-3.37989	3.06398	-1.1031	0.269983	NA	0.766469	-2.58346	2.76664	-0.933788	0.350413	NA	0.766469	-2.48959	2.7507	-0.905074	0.365426	0.47831	0.766469	-2.63763	2.78051	-0.948614	0.342817	NA	VIT_00s0327g00070	AT2G43710.1	1e-20	96.7	1-to-many	AT2G43710.2	AT2G43710.1	Plant stearoyl-acyl-carrier-protein desaturase family protein	Encodes a stearoyl-ACP desaturase%2C involved in fatty acid desaturation. The ssi2 mutants have increased 18:0 and reduced 18:1 fatty acids. Exogenous application of glycerol to wild type plants mimics the ssi2 mutant phenotype. The altered 18:1 fatty acid content in the ssi2 mutants has an impact on SA- and JA-mediated defense signaling. ssi2 mutants resulted in hyper-resistance to green peach a…	"SSI2"	AtSSI2.FAB2.FATTY ACID BIOSYNTHESIS 2.LDW1.lesion dwarf mimic 1	suppressor of SA insensitive 2	SSI2%3B FUNCTIONS IN: acyl-[acyl-carrier-protein] desaturase activity%2C stearoyl-CoA 9-desaturase activity%3B INVOLVED IN: in 10 processes%3B LOCATED IN: chloroplast%2C chloroplast stroma%2C plastid%3B EXPRESSED IN: 22 plant structures%3B EXPRESSED DURING: 15 growth stages%3B CONTAINS InterPro DOMAIN/s: Ribonucleotide reductase-related (InterPro:IPR012348)%2C Ferritin/ribonucleotide reductase-li…	****	PMID:11481500.PMID:12232421.PMID:18431481.PMID:18633119.PMID:16207701.gene:2043898.UniProt:O22832	NA	'5.1.8'	'Lipid metabolism.fatty acid synthesis.stearoyl-ACP desaturase'	'Lipid metabolism.fatty acid synthesis.stearoyl-ACP desaturase (original description: none)'
Vitvi00g00450	0.0489627	0	6.58482	0	1	NA	0.0489627	0	5.88922	0	1	NA	0.0489627	1.38641	5.88968	0.235397	0.813901	NA	0.0489627	0	5.88968	0	1	NA		NA	NA	NA	NA	NA	NA	NA	NA	NA	NA	NA	NA	NA	NA	NA	'35.2'	'not assigned.not annotated'	' no hits & (original description: none)'
Vitvi00g00491	0.193119	0	6.58482	0	1	NA	0.193119	0	5.88922	0	1	NA	0.193119	-2.3956	5.81683	-0.411839	0.680457	NA	0.193119	0.836044	5.88968	0.141951	0.887119	NA	VIT_00s0342g00030	AT5G19390.1	4.4e-26	117.9	1-to-many	AT5G19390.2.AT5G19390.3.AT5G19390.4	AT5G19390.1	Rho GTPase activation protein (RhoGAP) with PH domain-containing protein	Encodes a protein with similarity to REN1%2C a Rho GTPase activating protein.	NA	NA	NA	Rho GTPase activation protein (RhoGAP) with PH domain%3B FUNCTIONS IN: Rho GTPase activator activity%2C phosphoinositide binding%3B INVOLVED IN: signal transduction%3B LOCATED IN: chloroplast thylakoid membrane%3B EXPRESSED IN: guard cell%2C cultured cell%3B CONTAINS InterPro DOMAIN/s: Pleckstrin homology-type (InterPro:IPR011993)%2C Rho GTPase activation protein (InterPro:IPR008936)%2C Pleckstri…	****	gene:2150264.UniProt:Q8RWQ4	NA	'35.1'	'not assigned.annotated'	'Rho GTPase-activating protein 7 OS=Arabidopsis thaliana (sp|q8rwq4|rgap7_arath : 139.0)'
Vitvi00g00492	69.3282	-0.123571	0.333602	-0.370416	0.711072	0.800545	69.3282	0.229356	0.294341	0.77922	0.43585	0.542065	69.3282	0.159093	0.289649	0.549261	0.582826	0.684021	69.3282	-0.186692	0.3012	-0.619825	0.535373	0.636327	GSVIVT00008472001	AT5G15550.1	8.6e-48	189.1	1-to-many	AT5G15550.2.AT5G15550.3	AT5G15550.1	Transducin/WD40 repeat-like superfamily protein	NA	NA	AtPEP2.Arabidopsis thaliana pescadillo ortholog.atPEIP2	NA	Transducin/WD40 repeat-like superfamily protein%3B FUNCTIONS IN: nucleotide binding%3B INVOLVED IN: biological_process unknown%3B LOCATED IN: nucleolus%2C CUL4 RING ubiquitin ligase complex%2C heterotrimeric G-protein complex%3B EXPRESSED IN: 21 plant structures%3B EXPRESSED DURING: 13 growth stages%3B CONTAINS InterPro DOMAIN/s: WD40 repeat 2 (InterPro:IPR019782)%2C WD40 repeat%2C conserved site…	****	PMID:15496452.PMID:18223036.PMID:18552200.PMID:21166475.gene:2180951.UniProt:Q9LF27	NA	'35.1'	'not assigned.annotated'	'Ribosome biogenesis protein WDR12 homolog OS=Arabidopsis thaliana (sp|q9lf27|wdr12_arath : 186.0)'
Vitvi00g00493	0	NA	NA	NA	NA	NA	0	NA	NA	NA	NA	NA	0	NA	NA	NA	NA	NA	0	NA	NA	NA	NA	NA		AT4G38780.1	1.8e-10	62.4	1-to-1	NA	AT4G38780.1	pre-mRNA-processing-splicing factor-like protein	NA	NA	NA	NA	Pre-mRNA-processing-splicing factor%3B FUNCTIONS IN: molecular_function unknown%3B INVOLVED IN: nuclear mRNA splicing%2C via spliceosome%3B LOCATED IN: spliceosomal complex%3B EXPRESSED IN: 19 plant structures%3B EXPRESSED DURING: 8 growth stages%3B CONTAINS InterPro DOMAIN/s: Mov34/MPN/PAD-1 (InterPro:IPR000555)%2C Pre-mRNA-processing-splicing factor 8%2C U5-snRNA-binding (InterPro:IPR019581)%2C…	**	gene:2141790.UniProt:F4JUG5	NA	'35.2'	'not assigned.not annotated'	' no hits & (original description: none)'
Vitvi00g00494	0.534898	-1.47982	5.01449	-0.295109	0.767911	NA	0.534898	0	4.65252	0	1	NA	0.534898	1.98324	4.63735	0.427668	0.668893	NA	0.534898	-1.08752	4.65275	-0.233738	0.815188	NA		AT4G30160.1	6.5e-24	110.5	1-to-many	AT4G30160.2.AT4G30160.3.AT4G30160.4	AT4G30160.1	villin 4	Encodes a major actin filament bundling protein that is involved in root hair growth through regulating actin organization in a Ca2+-dependent manner.	"VLN4"	ATVLN4	villin 4	villin 4 (VLN4)%3B FUNCTIONS IN: actin binding%3B INVOLVED IN: cytoskeleton organization%3B LOCATED IN: cellular_component unknown%3B EXPRESSED IN: 24 plant structures%3B EXPRESSED DURING: 13 growth stages%3B CONTAINS InterPro DOMAIN/s: Gelsolin (InterPro:IPR007122)%2C Villin headpiece (InterPro:IPR003128)%2C Gelsolin domain (InterPro:IPR007123)%3B BEST Arabidopsis thaliana protein match is: vill…	****	PMID:14581634.gene:2128910.UniProt:O65570	NA	'20.2.2.5'	'Cytoskeleton.microfilament network.actin polymerisation.villin actin-crosslinking factor'	'Cytoskeleton.microfilament network.actin polymerisation.villin actin-crosslinking factor (original description: none)'
Vitvi00g00495	0.0377641	0	6.58482	0	1	NA	0.0377641	-0.846919	5.88922	-0.143809	0.885652	NA	0.0377641	0	5.88968	0	1	NA	0.0377641	0	5.88968	0	1	NA		NA	NA	NA	NA	NA	NA	NA	NA	NA	NA	NA	NA	NA	NA	NA	'35.2'	'not assigned.not annotated'	' no hits & (original description: none)'
Vitvi00g00496	0	NA	NA	NA	NA	NA	0	NA	NA	NA	NA	NA	0	NA	NA	NA	NA	NA	0	NA	NA	NA	NA	NA	VIT_00s0342g00040	AT1G58230.1	6.6e-42	172.6	1-to-many	AT1G58230.2.AT1G58230.3	AT1G58230.1	binding protein	NA	NA	BCHB.Beach-Domain Homolog B	NA	binding%3B FUNCTIONS IN: binding%3B INVOLVED IN: signal transduction%3B LOCATED IN: mitochondrion%3B EXPRESSED IN: 23 plant structures%3B EXPRESSED DURING: 13 growth stages%3B CONTAINS InterPro DOMAIN/s: WD40 repeat 2 (InterPro:IPR019782)%2C Beige/BEACH (InterPro:IPR000409)%2C WD40 repeat%2C conserved site (InterPro:IPR019775)%2C WD40 repeat (InterPro:IPR001680)%2C WD40 repeat-like-containing dom…	****	PMID:14671022.gene:3433262.UniProt:F4I9T0	NA	'23.5.1.2.9'	'Protein translocation.nucleus.nucleocytoplasmic transport.karyopherin beta transport receptors.XPO2 export karyopherin'	'Protein translocation.nucleus.nucleocytoplasmic transport.karyopherin beta transport receptors.XPO2 export karyopherin (original description: none)'
Vitvi00g00542	0	NA	NA	NA	NA	NA	0	NA	NA	NA	NA	NA	0	NA	NA	NA	NA	NA	0	NA	NA	NA	NA	NA		NA	NA	NA	NA	NA	NA	NA	NA	NA	NA	NA	NA	NA	NA	NA	'35.2'	'not assigned.not annotated'	' no hits & (original description: none)'
Vitvi00g00543	0	NA	NA	NA	NA	NA	0	NA	NA	NA	NA	NA	0	NA	NA	NA	NA	NA	0	NA	NA	NA	NA	NA		NA	NA	NA	NA	NA	NA	NA	NA	NA	NA	NA	NA	NA	NA	NA	'35.2'	'not assigned.not annotated'	' no hits & (original description: none)'
Vitvi00g00544	0	NA	NA	NA	NA	NA	0	NA	NA	NA	NA	NA	0	NA	NA	NA	NA	NA	0	NA	NA	NA	NA	NA		NA	NA	NA	NA	NA	NA	NA	NA	NA	NA	NA	NA	NA	NA	NA	'35.2'	'not assigned.not annotated'	' no hits & (original description: none)'
Vitvi00g00545	0	NA	NA	NA	NA	NA	0	NA	NA	NA	NA	NA	0	NA	NA	NA	NA	NA	0	NA	NA	NA	NA	NA		NA	NA	NA	NA	NA	NA	NA	NA	NA	NA	NA	NA	NA	NA	NA	'35.2'	'not assigned.not annotated'	' no hits & (original description: none)'
Vitvi00g00547	0	NA	NA	NA	NA	NA	0	NA	NA	NA	NA	NA	0	NA	NA	NA	NA	NA	0	NA	NA	NA	NA	NA		NA	NA	NA	NA	NA	NA	NA	NA	NA	NA	NA	NA	NA	NA	NA	'35.2'	'not assigned.not annotated'	' no hits & (original description: none)'
Vitvi00g00580	0	NA	NA	NA	NA	NA	0	NA	NA	NA	NA	NA	0	NA	NA	NA	NA	NA	0	NA	NA	NA	NA	NA		NA	NA	NA	NA	NA	NA	NA	NA	NA	NA	NA	NA	NA	NA	NA	'35.2'	'not assigned.not annotated'	' no hits & (original description: none)'
Vitvi00g00581	0	NA	NA	NA	NA	NA	0	NA	NA	NA	NA	NA	0	NA	NA	NA	NA	NA	0	NA	NA	NA	NA	NA		NA	NA	NA	NA	NA	NA	NA	NA	NA	NA	NA	NA	NA	NA	NA	'35.2'	'not assigned.not annotated'	' no hits & (original description: none)'
Vitvi00g00582	2.69669	0.948932	2.53186	0.374797	0.707812	0.798374	2.69669	3.06444	2.44239	1.25469	0.209591	0.305401	2.69669	-0.71903	2.17039	-0.33129	0.740425	0.813043	2.69669	-5.14156	2.41401	-2.12989	0.0331811	0.0654755	VIT_00s0384g00020	AT2G22750.3	2.3e-11	68.6	1-to-many	AT2G22750.4.AT2G22750.5	AT2G22750.3	basic helix-loop-helix (bHLH) DNA-binding superfamily protein	NA	NA	NA	NA	NA	NA	NA	NA	'15.7.33'	'RNA biosynthesis.transcriptional activation.bHLH transcription factor'	'RNA biosynthesis.transcriptional activation.bHLH transcription factor (original description: none)'
Vitvi00g00610	18.4856	-3.72273	1.27144	-2.92796	0.00341198	0.0117494	18.4856	0.062474	1.13238	0.0551704	0.956003	0.971107	18.4856	0.532043	1.11732	0.476178	0.633947	0.72649	18.4856	0.457177	1.16514	0.392381	0.694777	0.772905	VIT_00s0396g00010	ATMG01275.1	2e-60	231.1	1-to-1	NA	ATMG01275.1	NADH dehydrogenase 1A	Encodes subunit of mitochondrial NAD(P)H dehydrogenase that is trans-spliced from three precursors%2C NAD1A%2C NAD1B%2C and NAD1C.	"NAD1A"	NAD1.NADH DEHYDROGENASE 1.ND1.NAD(P)H DEHYDROGENASE 1	NADH dehydrogenase 1A	NADH dehydrogenase 1A (NAD1A)%3B INVOLVED IN: oxidation reduction%3B LOCATED IN: mitochondrial respiratory chain complex I%2C respiratory chain complex I%3B CONTAINS InterPro DOMAIN/s: NADH:ubiquinone oxidoreductase%2C subunit 1 (InterPro:IPR001694)%2C NADH:ubiquinone oxidoreductase%2C subunit 1%2C conserved site (InterPro:IPR018086)%3B BEST Arabidopsis thaliana protein match is: NADH dehydrogena…	*****	PMID:17965268.PMID:18189341.gene:1009022810	NA	'35.1'	'not assigned.annotated'	'NADH-ubiquinone oxidoreductase chain 1 OS=Petunia hybrida (sp|q01300|nu1m_pethy : 194.0)'
Vitvi00g00613	0.018551	-0.0842869	6.5823	-0.0128051	0.989783	NA	0.018551	0	5.88922	0	1	NA	0.018551	0	5.88968	0	1	NA	0.018551	0	5.88968	0	1	NA		NA	NA	NA	NA	NA	NA	NA	NA	NA	NA	NA	NA	NA	NA	NA	'35.2'	'not assigned.not annotated'	' no hits & (original description: none)'
Vitvi00g00614	16.6503	-2.42187	1.04497	-2.31764	0.0204689	0.0516923	16.6503	0.155718	0.967116	0.161013	0.872083	0.909844	16.6503	0.514573	0.976111	0.527167	0.598078	0.696483	16.6503	0.653047	1.05994	0.616118	0.537817	0.638704		ATMG00270.1	2.5e-101	366.3	1-to-1	NA	ATMG00270.1	NADH dehydrogenase 6	NADH dehydrogenase subunit 6	"NAD6"	NA	NADH dehydrogenase 6	NADH dehydrogenase 6 (NAD6)%3B CONTAINS InterPro DOMAIN/s: NADH:ubiquinone/plastoquinone oxidoreductase%2C chain 6 (InterPro:IPR001457)%3B BEST Arabidopsis thaliana protein match is: Cytochrome b/b6 protein (TAIR:ATMG00590.1).	*****	PMID:17007845.PMID:18189341.gene:1009022717	NA	'2.4.1.3.7'	'Cellular respiration.oxidative phosphorylation.NADH dehydrogenase complex.proton translocation (module P).ND6/NQO10 component'	'Cellular respiration.oxidative phosphorylation.NADH dehydrogenase complex.proton translocation (module P).ND6/NQO10 component (original description: none)'
Vitvi00g00615	32.4077	-3.37896	0.801982	-4.21327	2.51702e-05	0.000164052	32.4077	-0.434986	0.7218	-0.60264	0.546748	0.644676	32.4077	0.389683	0.700337	0.556422	0.577922	0.679692	32.4077	0.712546	0.736307	0.96773	0.333179	0.439754	VIT_00s0396g00050	AT2G07734.1	4.3e-167	585.5	1-to-many	ATMG00290.1	AT2G07734.1	Alpha-L RNA-binding motif/Ribosomal protein S4 family protein	NA	NA	NA	NA	Alpha-L RNA-binding motif/Ribosomal protein S4 family protein%3B FUNCTIONS IN: structural constituent of ribosome%2C RNA binding%3B INVOLVED IN: translation%3B LOCATED IN: small ribosomal subunit%3B CONTAINS InterPro DOMAIN/s: RNA-binding S4 (InterPro:IPR002942)%3B BEST Arabidopsis thaliana protein match is: mitochondrial ribosomal protein S4 (TAIR:ATMG00290.1)%3B Has 1839 Blast hits to 1839 prot…	*****	gene:2828382	NA	'17.6.1.2.3'	'Protein biosynthesis.organelle translation machineries.mitochondrial ribosome.small subunit proteome.mtRPS4 component'	'Protein biosynthesis.organelle translation machineries.mitochondrial ribosome.small subunit proteome.mtRPS4 component (original description: none)'
Vitvi00g00616	15.0595	0.0528661	0.538382	0.0981944	0.921778	0.952173	15.0595	0.913263	0.503285	1.8146	0.0695848	0.123865	15.0595	-0.418013	0.506764	-0.824867	0.409447	0.522404	15.0595	-0.604188	0.514369	-1.17462	0.240147	0.33855	VIT_00s0396g00060	NA	NA	NA	NA	NA	NA	NA	NA	NA	NA	NA	NA	NA	NA	NA	'35.2'	'not assigned.not annotated'	' no hits & (original description: none)'
Vitvi00g00638	0	NA	NA	NA	NA	NA	0	NA	NA	NA	NA	NA	0	NA	NA	NA	NA	NA	0	NA	NA	NA	NA	NA		NA	NA	NA	NA	NA	NA	NA	NA	NA	NA	NA	NA	NA	NA	NA	'35.2'	'not assigned.not annotated'	' no hits & (original description: none)'
Vitvi00g00639	0.103816	0	6.58482	0	1	NA	0.103816	0	5.88922	0	1	NA	0.103816	2.49501	5.84929	0.42655	0.669707	NA	0.103816	0	5.88968	0	1	NA		NA	NA	NA	NA	NA	NA	NA	NA	NA	NA	NA	NA	NA	NA	NA	'35.2'	'not assigned.not annotated'	' no hits & (original description: none)'
Vitvi00g00640	0	NA	NA	NA	NA	NA	0	NA	NA	NA	NA	NA	0	NA	NA	NA	NA	NA	0	NA	NA	NA	NA	NA		NA	NA	NA	NA	NA	NA	NA	NA	NA	NA	NA	NA	NA	NA	NA	'35.2'	'not assigned.not annotated'	' no hits & (original description: none)'
Vitvi00g00663	2.90595	-5.74393	2.55016	-2.25238	0.0242984	0.0594431	2.90595	-5.21472	2.23339	-2.33489	0.019549	0.0423632	2.90595	-1.81329	2.30292	-0.78739	0.431053	0.543472	2.90595	-2.56118	2.36496	-1.08297	0.278821	0.381021	VIT_00s0437g00010	AT4G21400.4	1.8e-47	188.7	1-to-many	AT4G21400.5.AT4G21400.6.AT4G21400.7.AT4G21400.8	AT4G21400.4	cysteine-rich RLK (RECEPTOR-like protein kinase) 28	NA	"CRK28"	NA	cysteine-rich RLK (RECEPTOR-like protein kinase) 28	NA	NA	NA	NA	'50.2.7'	'Enzyme classification.EC_2 transferases.EC_2.7 transferase transferring phosphorus-containing group'	'Cysteine-rich receptor-like protein kinase 37 OS=Arabidopsis thaliana (sp|q9xec7|crk37_arath : 110.0) & Enzyme classification.EC_2 transferases.EC_2.7 transferase transferring phosphorus-containing group(50.2.7 : 73.2) (original description: none)'
Vitvi00g00664	1.08111	-4.19919	2.57403	-1.63137	0.102812	NA	1.08111	-4.02158	2.26847	-1.77282	0.0762593	0.133854	1.08111	-2.01896	2.37105	-0.851506	0.394488	0.508025	1.08111	0	2.51309	0	1	1	VIT_00s0437g00020	AT4G23160.1	1.6e-11	65.9	1-to-1	NA	AT4G23160.1	cysteine-rich RECEPTOR-like kinase	Encodes a cysteine-rich receptor-like protein kinase.	"CRK8"	NA	cysteine-rich RLK (RECEPTOR-like protein kinase) 8	cysteine-rich RLK (RECEPTOR-like protein kinase) 8 (CRK8)%3B FUNCTIONS IN: kinase activity%3B INVOLVED IN: protein amino acid phosphorylation%3B CONTAINS InterPro DOMAIN/s: Protein kinase%2C ATP binding site (InterPro:IPR017441)%2C Reverse transcriptase%2C RNA-dependent DNA polymerase (InterPro:IPR013103)%2C Serine/threonine-protein kinase domain (InterPro:IPR002290)%2C Protein of unknown functio…	**	gene:2121650	NA	'35.2'	'not assigned.not annotated'	' no hits & (original description: none)'
Vitvi00g00665	0.226668	-0.966984	6.29125	-0.153703	0.877844	NA	0.226668	-1.60104	5.62325	-0.284719	0.77586	NA	0.226668	2.26503	5.61838	0.403146	0.686841	NA	0.226668	0	5.6465	0	1	NA		AT1G61750.1	1.2e-15	80.9	1-to-1	NA	AT1G61750.1	Receptor-like protein kinase-related family protein	NA	NA	NA	NA	Receptor-like protein kinase-related family protein%3B FUNCTIONS IN: molecular_function unknown%3B INVOLVED IN: biological_process unknown%3B LOCATED IN: endomembrane system%3B EXPRESSED IN: root%3B CONTAINS InterPro DOMAIN/s: Protein of unknown function DUF26 (InterPro:IPR002902)%3B BEST Arabidopsis thaliana protein match is: Receptor-like protein kinase-related family protein (TAIR:AT1G63590.1)…	*	gene:2195777.UniProt:Q9SYB1	NA	'35.1'	'not assigned.annotated'	'Cysteine-rich repeat secretory protein 1 OS=Arabidopsis thaliana (sp|q9syb1|crrs1_arath : 80.9)'
Vitvi00g00666	0	NA	NA	NA	NA	NA	0	NA	NA	NA	NA	NA	0	NA	NA	NA	NA	NA	0	NA	NA	NA	NA	NA		NA	NA	NA	NA	NA	NA	NA	NA	NA	NA	NA	NA	NA	NA	NA	'35.2'	'not assigned.not annotated'	' no hits & (original description: none)'
Vitvi00g00668	92.0296	0.0786413	0.426477	0.184398	0.853701	0.905364	92.0296	-0.712619	0.36879	-1.93232	0.0533204	0.0991983	92.0296	0.253466	0.372869	0.679771	0.496649	0.605795	92.0296	-0.396948	0.369754	-1.07355	0.283026	0.385533	VIT_00s0437g00070	AT4G21410.3	3.1e-70	265.4	1-to-1	NA	AT4G21410.3	cysteine-rich RLK (RECEPTOR-like protein kinase) 29	NA	"CRK29"	NA	cysteine-rich RLK (RECEPTOR-like protein kinase) 29	NA	NA	UniProt:Q8S9L6	NA	'50.2.7'	'Enzyme classification.EC_2 transferases.EC_2.7 transferase transferring phosphorus-containing group'	'Cysteine-rich receptor-like protein kinase 10 OS=Arabidopsis thaliana (sp|q8gya4|crk10_arath : 221.0) & Enzyme classification.EC_2 transferases.EC_2.7 transferase transferring phosphorus-containing group(50.2.7 : 66.8) (original description: none)'
Vitvi00g00670	0.216043	-2.19477	6.51533	-0.336862	0.736221	NA	0.216043	-0.846989	5.88922	-0.14382	0.885642	NA	0.216043	1.38641	5.88968	0.235397	0.813901	NA	0.216043	0	5.88968	0	1	NA		ATMG01250.1	5.8e-14	76.6	1-to-1	NA	ATMG01250.1	RNA-directed DNA polymerase (reverse transcriptase)	NA	"ORF102"	NA	NA	RNA-directed DNA polymerase (reverse transcriptase)%3B FUNCTIONS IN: RNA binding%2C RNA-directed DNA polymerase activity%3B INVOLVED IN: RNA-dependent DNA replication%3B LOCATED IN: cellular_component unknown%3B CONTAINS InterPro DOMAIN/s: RNA-directed DNA polymerase (reverse transcriptase) (InterPro:IPR000477)%2C RNA-directed DNA polymerase (reverse transcriptase)%2C related (InterPro:IPR015706).	*	gene:1009022675	NA	'35.2'	'not assigned.not annotated'	' no hits & (original description: none)'
Vitvi00g00671	67.5121	-1.23838	0.488517	-2.53497	0.0112455	0.0317064	67.5121	0.484516	0.446504	1.08513	0.277862	0.382272	67.5121	-0.00785003	0.449289	-0.0174721	0.98606	0.99375	67.5121	-0.465747	0.445834	-1.04467	0.296178	0.400176	VIT_00s0438g00010	ATMG00160.1	1.9e-46	186	1-to-1	NA	ATMG00160.1	cytochrome oxidase 2	cytochrome c oxidase subunit 2	"COX2"	NA	cytochrome oxidase 2	cytochrome oxidase 2 (COX2)%3B FUNCTIONS IN: cytochrome-c oxidase activity%3B INVOLVED IN: respiratory electron transport chain%3B LOCATED IN: mitochondrion%2C chloroplast%2C mitochondrial respiratory chain complex IV%3B EXPRESSED IN: 22 plant structures%3B EXPRESSED DURING: 12 growth stages%3B CONTAINS InterPro DOMAIN/s: Cytochrome C oxidase subunit II-like%2C transmembrane domain (InterPro:IPR0…	****	PMID:15028209.PMID:16857195.gene:1009022695	NA	'35.1'	'not assigned.annotated'	'Cytochrome c oxidase subunit 2 OS=Oryza sativa subsp. japonica (sp|p04373|cox2_orysj : 173.0)'
Vitvi00g00672	66.5939	-3.02914	0.773923	-3.91401	9.07771e-05	0.000514185	66.5939	0.112669	0.685582	0.164341	0.869463	0.907699	66.5939	0.0317542	0.687418	0.0461935	0.963156	0.977248	66.5939	0.0791925	0.697432	0.113549	0.909595	0.939687		ATMG00160.1	3.8e-62	235.3	1-to-1	NA	ATMG00160.1	cytochrome oxidase 2	cytochrome c oxidase subunit 2	"COX2"	NA	cytochrome oxidase 2	cytochrome oxidase 2 (COX2)%3B FUNCTIONS IN: cytochrome-c oxidase activity%3B INVOLVED IN: respiratory electron transport chain%3B LOCATED IN: mitochondrion%2C chloroplast%2C mitochondrial respiratory chain complex IV%3B EXPRESSED IN: 22 plant structures%3B EXPRESSED DURING: 12 growth stages%3B CONTAINS InterPro DOMAIN/s: Cytochrome C oxidase subunit II-like%2C transmembrane domain (InterPro:IPR0…	****	PMID:15028209.PMID:16857195.gene:1009022695	NA	'35.1'	'not assigned.annotated'	'Cytochrome c oxidase subunit 2 OS=Glycine max (sp|p05491|cox2_soybn : 205.0)'
Vitvi00g00673	0	NA	NA	NA	NA	NA	0	NA	NA	NA	NA	NA	0	NA	NA	NA	NA	NA	0	NA	NA	NA	NA	NA		AT5G33406.1	0.00019	43.9	1-to-1	NA	AT5G33406.1	hAT dimerization domain-containing protein / transposase-like protein	NA	NA	NA	NA	hAT dimerisation domain-containing protein / transposase-related%3B FUNCTIONS IN: protein dimerization activity%3B INVOLVED IN: biological_process unknown%3B LOCATED IN: mitochondrion%3B CONTAINS InterPro DOMAIN/s: HAT dimerisation (InterPro:IPR008906)%3B BEST Arabidopsis thaliana protein match is: hAT transposon superfamily (TAIR:AT4G15020.2)%3B Has 707 Blast hits to 681 proteins in 26 species: …	**	gene:504953008.UniProt:F4KHA1	NA	'35.2'	'not assigned.not annotated'	' no hits & (original description: none)'
Vitvi00g00674	0	NA	NA	NA	NA	NA	0	NA	NA	NA	NA	NA	0	NA	NA	NA	NA	NA	0	NA	NA	NA	NA	NA		NA	NA	NA	NA	NA	NA	NA	NA	NA	NA	NA	NA	NA	NA	NA	'35.2'	'not assigned.not annotated'	' no hits & (original description: none)'
Vitvi00g00675	573.239	-0.401631	0.174637	-2.2998	0.0214596	0.0537296	573.239	-0.29681	0.156816	-1.89273	0.0583941	0.107154	573.239	0.202995	0.154218	1.31629	0.188078	0.282344	573.239	0.0240088	0.157531	0.152407	0.878866	0.917793	VIT_00s0441g00010	AT4G34910.1	1.2e-38	163.7	1-to-1	NA	AT4G34910.1	P-loop containing nucleoside triphosphate hydrolases superfamily protein	NA	NA	NA	NA	P-loop containing nucleoside triphosphate hydrolases superfamily protein%3B FUNCTIONS IN: helicase activity%2C ATP binding%2C nucleic acid binding%2C ATP-dependent helicase activity%3B LOCATED IN: cellular_component unknown%3B EXPRESSED IN: 19 plant structures%3B EXPRESSED DURING: 11 growth stages%3B CONTAINS InterPro DOMAIN/s: RNA helicase%2C DEAD-box type%2C Q motif (InterPro:IPR014014)%2C DNA/…	****	gene:2116919.UniProt:Q9SW44	NA	'35.2'	'not assigned.not annotated'
Vitvi00g00676	282.855	-0.433995	0.202485	-2.14335	0.0320851	0.074771	282.855	-0.580689	0.183192	-3.16984	0.00152522	0.00462441	282.855	0.149764	0.181784	0.823855	0.410022	0.522935	282.855	-0.417922	0.185422	-2.25389	0.0242028	0.0498205	VIT_00s0441g00020	AT4G37760.1	1e-84	313.9	1-to-1	NA	AT4G37760.1	squalene epoxidase 3	NA	"SQE3"	NA	squalene epoxidase 3	squalene epoxidase 3 (SQE3)%3B FUNCTIONS IN: squalene monooxygenase activity%3B INVOLVED IN: response to jasmonic acid stimulus%2C response to wounding%2C sterol biosynthetic process%3B LOCATED IN: endomembrane system%2C integral to membrane%3B EXPRESSED IN: 23 plant structures%3B EXPRESSED DURING: 15 growth stages%3B CONTAINS InterPro DOMAIN/s: Squalene epoxidase (InterPro:IPR013698)%2C Fumarate…	****	PMID:10350086.PMID:16021335.PMID:19309460.gene:2137568.UniProt:Q8VYH2	NA	'35.1'	'not assigned.annotated'	'Squalene monooxygenase OS=Panax ginseng (sp|o48651|erg1_pangi : 167.0)'
Vitvi00g00710	744.714	0.593762	0.307842	1.92879	0.053757	0.112983	744.714	0.516377	0.275815	1.87219	0.0611804	0.111294	744.714	0.467507	0.274512	1.70305	0.0885594	0.15194	744.714	0.658895	0.27706	2.37817	0.017399	0.0374781	VIT_00s0487g00030	AT5G66900.1	6.1e-63	241.5	1-to-many	AT5G66900.2	AT5G66900.1	Disease resistance protein (CC-NBS-LRR class) family	NA	NA	NA	NA	Disease resistance protein (CC-NBS-LRR class) family%3B FUNCTIONS IN: ATP binding%3B INVOLVED IN: apoptosis%2C defense response%3B CONTAINS InterPro DOMAIN/s: NB-ARC (InterPro:IPR002182)%2C Powdery mildew resistance protein%2C RPW8 domain (InterPro:IPR008808)%2C Disease resistance protein (InterPro:IPR000767)%3B BEST Arabidopsis thaliana protein match is: Disease resistance protein (CC-NBS-LRR cl…	****	gene:2175018.UniProt:Q9FKZ1	NA	'35.1'	'not assigned.annotated'	'Probable disease resistance protein At5g66900 OS=Arabidopsis thaliana (sp|q9fkz1|drl42_arath : 263.0)'
Vitvi00g00711	579.693	0.210776	0.187458	1.12439	0.260849	0.386591	579.693	1.53671	0.16595	9.2601	2.04246e-20	7.40139e-19	579.693	-0.15342	0.167796	-0.914322	0.360548	0.473776	579.693	0.69061	0.166119	4.15731	3.22013e-05	0.000138956	VIT_00s0487g00050	AT5G66900.1	1.2e-28	127.5	1-to-many	AT5G66900.2	AT5G66900.1	Disease resistance protein (CC-NBS-LRR class) family	NA	NA	NA	NA	Disease resistance protein (CC-NBS-LRR class) family%3B FUNCTIONS IN: ATP binding%3B INVOLVED IN: apoptosis%2C defense response%3B CONTAINS InterPro DOMAIN/s: NB-ARC (InterPro:IPR002182)%2C Powdery mildew resistance protein%2C RPW8 domain (InterPro:IPR008808)%2C Disease resistance protein (InterPro:IPR000767)%3B BEST Arabidopsis thaliana protein match is: Disease resistance protein (CC-NBS-LRR cl…	****	gene:2175018.UniProt:Q9FKZ1	NA	'35.1'	'not assigned.annotated'	'Probable disease resistance protein At5g66900 OS=Arabidopsis thaliana (sp|q9fkz1|drl42_arath : 242.0)'
Vitvi00g00715	0	NA	NA	NA	NA	NA	0	NA	NA	NA	NA	NA	0	NA	NA	NA	NA	NA	0	NA	NA	NA	NA	NA		NA	NA	NA	NA	NA	NA	NA	NA	NA	NA	NA	NA	NA	NA	NA	'35.2'	'not assigned.not annotated'	' no hits & (original description: none)'
Vitvi00g00716	4.96325	-5.27108	1.74442	-3.02168	0.00251376	0.00908372	4.96325	-5.76469	1.47546	-3.90705	9.34299e-05	0.000385367	4.96325	-6.19331	1.46644	-4.22337	2.40679e-05	0.000104255	4.96325	-3.26507	1.5272	-2.13795	0.0325211	0.0643404		NA	NA	NA	NA	NA	NA	NA	NA	NA	NA	NA	NA	NA	NA	NA	'35.2'	'not assigned.not annotated'	' no hits & (original description: none)'
Vitvi00g00717	2.75848	-4.02979	1.89833	-2.12281	0.0337695	0.0778734	2.75848	-3.53933	1.47965	-2.39201	0.0167566	0.0371245	2.75848	-0.663395	1.30909	-0.506761	0.612323	0.708761	2.75848	2.50836	1.6772	1.49556	0.134768	0.211616		ATMG00710.1	4.9e-06	50.4	1-to-1	NA	ATMG00710.1	Polynucleotidyl transferase%2C ribonuclease H-like superfamily protein	NA	"ORF120"	NA	NA	Polynucleotidyl transferase%2C ribonuclease H-like superfamily protein%3B FUNCTIONS IN: nucleic acid binding%3B INVOLVED IN: biological_process unknown%3B LOCATED IN: cellular_component unknown%3B CONTAINS InterPro DOMAIN/s: Polynucleotidyl transferase%2C ribonuclease H fold (InterPro:IPR012337).	*	gene:1009022689	NA	'35.1'	'not assigned.annotated'	'Retrovirus-related Pol polyprotein from transposon TNT 1-94 OS=Nicotiana tabacum (sp|p10978|polx_tobac : 179.0)'
Vitvi00g00718	0.428072	2.18182	6.5708	0.332048	0.739853	NA	0.428072	1.07637	5.88922	0.18277	0.854978	NA	0.428072	-1.95084	5.78034	-0.337496	0.735743	NA	0.428072	0	5.88968	0	1	NA		AT4G23160.2	1.2e-84	312	1-to-many	AT4G23160.3	AT4G23160.2	cysteine-rich RECEPTOR-like kinase	NA	"CRK8"	NA	cysteine-rich RLK (RECEPTOR-like protein kinase) 8	NA	NA	NA	NA	'35.1'	'not assigned.annotated'	'Retrovirus-related Pol polyprotein from transposon RE2 OS=Arabidopsis thaliana (sp|q9zt94|polr2_arath : 350.0)'
Vitvi00g00742	0	NA	NA	NA	NA	NA	0	NA	NA	NA	NA	NA	0	NA	NA	NA	NA	NA	0	NA	NA	NA	NA	NA		AT1G61680.1	1.8e-30	131	1-to-many	AT1G61680.2	AT1G61680.1	terpene synthase 14	NA	"TPS14"	ATTPS14.TERPENE SYNTHASE 14	terpene synthase 14	terpene synthase 14 (TPS14)%3B CONTAINS InterPro DOMAIN/s: Terpene synthase%2C metal-binding domain (InterPro:IPR005630)%2C Terpenoid synthase (InterPro:IPR008949)%2C Terpenoid cylases/protein prenyltransferase alpha-alpha toroid (InterPro:IPR008930)%2C Terpene synthase-like (InterPro:IPR001906)%3B BEST Arabidopsis thaliana protein match is: terpene synthase 02 (TAIR:AT4G16730.1)%3B Has 1701 Blas…	*****	PMID:9614092.gene:2195767.UniProt:Q84UV0	NA	'50.4.2'	'Enzyme classification.EC_4 lyases.EC_4.2 carbon-oxygen lyase'	'Probable terpene synthase 13 OS=Ricinus communis (sp|b9rxw4|tps13_ricco : 131.0) & Enzyme classification.EC_4 lyases.EC_4.2 carbon-oxygen lyase(50.4.2 : 40.2) (original description: none)'
Vitvi00g00755	0	NA	NA	NA	NA	NA	0	NA	NA	NA	NA	NA	0	NA	NA	NA	NA	NA	0	NA	NA	NA	NA	NA		AT1G58230.1	1.1e-21	102.1	1-to-many	AT1G58230.2.AT1G58230.3	AT1G58230.1	binding protein	NA	NA	BCHB.Beach-Domain Homolog B	NA	binding%3B FUNCTIONS IN: binding%3B INVOLVED IN: signal transduction%3B LOCATED IN: mitochondrion%3B EXPRESSED IN: 23 plant structures%3B EXPRESSED DURING: 13 growth stages%3B CONTAINS InterPro DOMAIN/s: WD40 repeat 2 (InterPro:IPR019782)%2C Beige/BEACH (InterPro:IPR000409)%2C WD40 repeat%2C conserved site (InterPro:IPR019775)%2C WD40 repeat (InterPro:IPR001680)%2C WD40 repeat-like-containing dom…	****	PMID:14671022.gene:3433262.UniProt:F4I9T0	NA	'35.1'	'not assigned.annotated'	'BEACH domain-containing protein B OS=Arabidopsis thaliana (sp|f4i9t0|bchb_arath : 99.0)'
Vitvi00g00756	4.53166	-1.00404	1.0531	-0.953414	0.34038	0.470434	4.53166	-2.3469	1.17691	-1.99412	0.0461389	0.0876825	4.53166	-2.66114	1.02373	-2.59946	0.00933707	0.0219119	4.53166	0.429195	1.02843	0.417329	0.676438	0.757793		AT3G60920.1	2.6e-13	75.1	1-to-many	AT3G60920.2	AT3G60920.1	beige/BEACH domain protein	NA	NA	BCHC1.Beach-Domain Homolog C1	NA	CONTAINS InterPro DOMAIN/s: Beige/BEACH (InterPro:IPR000409)%3B BEST Arabidopsis thaliana protein match is: WD-40 repeat family protein / beige-related (TAIR:AT2G45540.1)%3B Has 1795 Blast hits to 1563 proteins in 214 species: Archae - 2%3B Bacteria - 29%3B Metazoa - 830%3B Fungi - 160%3B Plants - 230%3B Viruses - 0%3B Other Eukaryotes - 544 (source: NCBI BLink).	**	gene:2100941.UniProt:F4JD14	NA	'35.2'	'not assigned.not annotated'	' no hits & (original description: none)'
Vitvi00g00757	3.77566	0.632215	1.19269	0.530073	0.596061	0.708951	3.77566	-0.0163687	1.14769	-0.0142623	0.988621	0.993383	3.77566	-1.5409	1.26632	-1.21683	0.223667	0.325207	3.77566	-0.470975	1.09623	-0.429632	0.667463	0.750676	VIT_00s0526g00010	AT2G45540.1	9.4e-59	224.6	1-to-many	AT2G45540.2.AT2G45540.3.AT2G45540.4.AT2G45540.5.AT2G45540.6	AT2G45540.1	WD-40 repeat family protein / beige-like protein	NA	NA	BCHC2.Beach-Domain Homolog C2	NA	WD-40 repeat family protein / beige-related%3B FUNCTIONS IN: nucleotide binding%3B INVOLVED IN: biological_process unknown%3B LOCATED IN: cellular_component unknown%3B EXPRESSED IN: 25 plant structures%3B EXPRESSED DURING: 14 growth stages%3B CONTAINS InterPro DOMAIN/s: WD40 repeat 2 (InterPro:IPR019782)%2C WD40 repeat-like-containing domain (InterPro:IPR011046)%2C Beige/BEACH (InterPro:IPR000409…	***	gene:2043678.UniProt:F4IG73-2	NA	'35.1'	'not assigned.annotated'	'BEACH domain-containing protein C2 OS=Arabidopsis thaliana (sp|f4ig73|bchc2_arath : 219.0)'
Vitvi00g00777	0.0917942	0	6.58482	0	1	NA	0.0917942	1.07647	5.88922	0.182787	0.854965	NA	0.0917942	1.38641	5.88968	0.235397	0.813901	NA	0.0917942	0	5.88968	0	1	NA		AT2G14860.1	5.4e-05	50.4	1-to-1	NA	AT2G14860.1	Peroxisomal membrane 22 kDa (Mpv17/PMP22) family protein	NA	NA	NA	NA	Peroxisomal membrane 22 kDa (Mpv17/PMP22) family protein%3B INVOLVED IN: biological_process unknown%3B LOCATED IN: integral to membrane%2C peroxisomal membrane%3B EXPRESSED IN: 21 plant structures%3B EXPRESSED DURING: 11 growth stages%3B CONTAINS InterPro DOMAIN/s: Mpv17/PMP22 (InterPro:IPR007248)%3B BEST Arabidopsis thaliana protein match is: Peroxisomal membrane 22 kDa (Mpv17/PMP22) family prot…	****	PMID:10318708.gene:2060458.UniProt:O82324	NA	'35.2'	'not assigned.not annotated'	' no hits & (original description: none)'
Vitvi00g00786	38.5994	1.02818	0.551177	1.86542	0.0621228	0.126791	38.5994	0.488769	0.44762	1.09193	0.274865	0.37916	38.5994	0.88798	0.457839	1.9395	0.0524403	0.0976535	38.5994	0.409244	0.425509	0.961775	0.336162	0.442964	VIT_00s0556g00010	AT5G65090.1	3.3e-41	169.9	1-to-many	AT5G65090.2.AT5G65090.3	AT5G65090.1	DNAse I-like superfamily protein	Encodes a protein involved in root hair morphogenesis and tip growth. Required for restricting both the size of the root-hair initiation site and the width of the root hairs during the transition to tip growth%2C but%2C apparently%2C is not required for normal subsequent tip growth.	"BST1"	DER4.DEFORMED ROOT HAIRS 4.MRH3	BRISTLED 1	BRISTLED 1 (BST1)%3B FUNCTIONS IN: hydrolase activity%2C inositol or phosphatidylinositol phosphatase activity%3B INVOLVED IN: root epidermal cell differentiation%2C root hair cell differentiation%2C cell tip growth%3B LOCATED IN: cellular_component unknown%3B EXPRESSED IN: 11 plant structures%3B EXPRESSED DURING: L mature pollen stage%2C M germinated pollen stage%2C 4 anthesis%2C petal different…	****	gene:3441683.UniProt:Q66GQ6	NA	'50.3.1'	'Enzyme classification.EC_3 hydrolases.EC_3.1 hydrolase acting on ester bond'	'Type I inositol polyphosphate 5-phosphatase 5 OS=Arabidopsis thaliana (sp|q66gq6|ip5p5_arath : 167.0) & Enzyme classification.EC_3 hydrolases.EC_3.1 hydrolase acting on ester bond(50.3.1 : 25.9) (original description: none)'
Vitvi00g00787	0	NA	NA	NA	NA	NA	0	NA	NA	NA	NA	NA	0	NA	NA	NA	NA	NA	0	NA	NA	NA	NA	NA		NA	NA	NA	NA	NA	NA	NA	NA	NA	NA	NA	NA	NA	NA	NA	'35.2'	'not assigned.not annotated'	' no hits & (original description: none)'
Vitvi00g00788	0	NA	NA	NA	NA	NA	0	NA	NA	NA	NA	NA	0	NA	NA	NA	NA	NA	0	NA	NA	NA	NA	NA	VIT_00s0557g00010	AT1G76340.1	1.6e-57	220.7	1-to-1	NA	AT1G76340.1	golgi nucleotide sugar transporter 3	Encodes a nucleotide-sugar transporter.	"GONST3"	NA	golgi nucleotide sugar transporter 3	golgi nucleotide sugar transporter 3 (GONST3)%3B CONTAINS InterPro DOMAIN/s: Protein of unknown function DUF250 (InterPro:IPR004853)%3B BEST Arabidopsis thaliana protein match is: golgi nucleotide sugar transporter 4 (TAIR:AT5G19980.1)%3B Has 1377 Blast hits to 1372 proteins in 233 species: Archae - 0%3B Bacteria - 8%3B Metazoa - 324%3B Fungi - 246%3B Plants - 675%3B Viruses - 0%3B Other Eukaryot…	****	PMID:17932292.gene:3692482.UniProt:Q9S845	NA	'24.2.1.1.4'	'Solute transport.carrier-mediated transport.DMT superfamily.NST-TPT group.GONST1/2/3/4 nucleotide sugar transporter'	'Solute transport.carrier-mediated transport.DMT superfamily.NST-TPT group.GONST1/2/3/4 nucleotide sugar transporter (original description: none)'
Vitvi00g00789	1151.31	-0.78943	0.161222	-4.89653	9.75429e-07	8.71876e-06	1151.31	-0.727678	0.143289	-5.07839	3.80655e-07	2.58154e-06	1151.31	-0.191697	0.142468	-1.34555	0.178448	0.270547	1151.31	0.0731706	0.14285	0.51222	0.608497	0.701099	VIT_00s0558g00010	AT3G49680.1	3.2e-21	100.9	1-to-many	AT3G49680.2	AT3G49680.1	branched-chain aminotransferase 3	Encodes a chloroplast branched-chain amino acid aminotransferase. Complements the yeast leu/iso-leu/val auxotrophy mutant.	"BCAT3"	ATBCAT-3	branched-chain aminotransferase 3	branched-chain aminotransferase 3 (BCAT3)%3B FUNCTIONS IN: branched-chain-amino-acid transaminase activity%2C catalytic activity%3B INVOLVED IN: branched chain family amino acid metabolic process%2C metabolic process%3B LOCATED IN: chloroplast%3B EXPRESSED IN: 23 plant structures%3B EXPRESSED DURING: 13 growth stages%3B CONTAINS InterPro DOMAIN/s: Aminotransferase%2C class IV (InterPro:IPR001544)…	****	PMID:18162591.PMID:18431481.PMID:19542295.PMID:21166475.gene:3703073.UniProt:Q9M401	NA	'35.1'	'not assigned.annotated'	'Branched-chain amino acid aminotransferase 2. chloroplastic OS=Humulus lupulus (sp|k7qhs5|bcat2_humlu : 106.0)'
Vitvi00g00790	4783.71	0.372197	0.163749	2.27298	0.0230275	0.0569183	4783.71	0.157053	0.146645	1.07097	0.284183	0.389165	4783.71	-0.0497674	0.146418	-0.339898	0.733933	0.807781	4783.71	-0.100156	0.147051	-0.681097	0.49581	0.599952	VIT_00s0558g00020	AT5G33406.1	3.1e-63	244.2	1-to-1	NA	AT5G33406.1	hAT dimerization domain-containing protein / transposase-like protein	NA	NA	NA	NA	hAT dimerisation domain-containing protein / transposase-related%3B FUNCTIONS IN: protein dimerization activity%3B INVOLVED IN: biological_process unknown%3B LOCATED IN: mitochondrion%3B CONTAINS InterPro DOMAIN/s: HAT dimerisation (InterPro:IPR008906)%3B BEST Arabidopsis thaliana protein match is: hAT transposon superfamily (TAIR:AT4G15020.2)%3B Has 707 Blast hits to 681 proteins in 26 species: …	**	gene:504953008.UniProt:F4KHA1	NA	'20.4.3.1'	'Cytoskeleton.cytoskeleton-nucleoskeleton linking.nuclear lamina.CRWN lamin-like protein'	'Cytoskeleton.cytoskeleton-nucleoskeleton linking.nuclear lamina.CRWN lamin-like protein (original description: none)'
Vitvi00g00791	0.208798	-2.25295	6.51389	-0.345869	0.729441	NA	0.208798	-0.84699	5.88922	-0.14382	0.885642	NA	0.208798	-0.537148	5.88968	-0.0912017	0.927332	NA	0.208798	0	5.88968	0	1	NA	GSVIVT00010657001	AT4G33720.1	2e-46	184.1	1-to-1	NA	AT4G33720.1	CAP (Cysteine-rich secretory proteins%2C Antigen 5%2C and Pathogenesis-related 1 protein) superfamily protein	NA	NA	NA	NA	CAP (Cysteine-rich secretory proteins%2C Antigen 5%2C and Pathogenesis-related 1 protein) superfamily protein%3B FUNCTIONS IN: molecular_function unknown%3B INVOLVED IN: biological_process unknown%3B LOCATED IN: endomembrane system%2C extracellular region%3B EXPRESSED IN: root%3B CONTAINS InterPro DOMAIN/s: Allergen V5/Tpx-1 related%2C conserved site (InterPro:IPR018244)%2C Allergen V5/Tpx-1 rela…	*****	gene:2134177.UniProt:O81888	NA	'35.1'	'not assigned.annotated'	'Basic form of pathogenesis-related protein 1 OS=Nicotiana tabacum (sp|p11670|prb1_tobac : 165.0)'
Vitvi00g00792	2172.88	0.397407	0.15734	2.52579	0.0115437	0.0323977	2172.88	0.162432	0.141631	1.14687	0.251437	0.353555	2172.88	-0.405408	0.140484	-2.8858	0.0039042	0.0101866	2172.88	-0.678845	0.14147	-4.7985	1.59859e-06	9.13231e-06	VIT_00s0558g00030	AT5G65760.1	1.3e-57	224.2	1-to-1	NA	AT5G65760.1	Serine carboxypeptidase S28 family protein	NA	NA	NA	NA	Serine carboxypeptidase S28 family protein%3B FUNCTIONS IN: serine-type peptidase activity%3B INVOLVED IN: proteolysis%3B LOCATED IN: chloroplast%2C vacuole%3B EXPRESSED IN: 23 plant structures%3B EXPRESSED DURING: 13 growth stages%3B CONTAINS InterPro DOMAIN/s: Peptidase S28 (InterPro:IPR008758)%3B BEST Arabidopsis thaliana protein match is: alpha/beta-Hydrolases superfamily protein (TAIR:AT2G24…	****	PMID:15028209.PMID:15539469.PMID:21166475.gene:2169944.UniProt:Q1JPM1	NA	'19.5.2.9'	'Protein degradation.peptidase families.serine-type peptidase activities.S28 serine carboxypeptidase'	'Protein degradation.peptidase families.serine-type peptidase activities.S28 serine carboxypeptidase (original description: none)'
Vitvi00g00794	16175	0.895189	0.426615	2.09835	0.0358742	0.0816609	16175	2.27325	0.381444	5.9596	2.52851e-09	2.51415e-08	16175	1.35912	0.381559	3.56201	0.00036803	0.00122815	16175	1.45388	0.381426	3.8117	0.000138014	0.000518078	VIT_00s0561g00020	AT4G27450.1	1e-53	209.5	1-to-1	NA	AT4G27450.1	aluminum induced protein with YGL and LRDR motifs	NA	NA	NA	NA	Aluminium induced protein with YGL and LRDR motifs%3B FUNCTIONS IN: molecular_function unknown%3B INVOLVED IN: biological_process unknown%3B LOCATED IN: cytosol%2C nucleus%2C plasma membrane%3B EXPRESSED IN: 25 plant structures%3B EXPRESSED DURING: 14 growth stages%3B BEST Arabidopsis thaliana protein match is: Aluminium induced protein with YGL and LRDR motifs (TAIR:AT3G15450.1)%3B Has 30201 Bla…	****	PMID:17317660.PMID:17644812.PMID:18433157.gene:2123993.UniProt:Q93V62	NA	'35.1'	'not assigned.annotated'	'Stem-specific protein TSJT1 OS=Nicotiana tabacum (sp|p24805|tsjt1_tobac : 99.4)'
Vitvi00g00811	108.14	1.33873	0.366972	3.64805	0.000264236	0.00130819	108.14	1.03011	0.340283	3.02722	0.00246814	0.00706838	108.14	0.545125	0.326956	1.66727	0.0954598	0.161793	108.14	0.68841	0.347803	1.97931	0.0477812	0.0893494	VIT_00s0587g00010	AT5G61000.1	1.2e-39	163.3	1-to-1	NA	AT5G61000.1	Replication factor-A protein 1-like protein	NA	"RPA70D"	NA	NA	RPA70D%3B FUNCTIONS IN: DNA binding%2C nucleic acid binding%3B INVOLVED IN: DNA replication%3B LOCATED IN: nucleus%3B EXPRESSED IN: 22 plant structures%3B EXPRESSED DURING: 13 growth stages%3B CONTAINS InterPro DOMAIN/s: Replication factor-a protein 1 Rpa1 (InterPro:IPR004591)%2C Nucleic acid-binding%2C OB-fold-like (InterPro:IPR016027)%2C Nucleic acid-binding%2C OB-fold (InterPro:IPR012340)%2C N…	****	gene:2173526.UniProt:Q9FME0	NA	'35.1'	'not assigned.annotated'	'Replication protein A 70 kDa DNA-binding subunit B OS=Oryza sativa subsp. japonica (sp|q10q08|rfa1b_orysj : 152.0)'
Vitvi00g00812	13.1016	4.07348	0.665784	6.11832	9.45681e-10	1.44726e-08	13.1016	3.03423	0.789041	3.84547	0.000120322	0.000484478	13.1016	2.53465	0.504525	5.02384	5.06495e-07	3.01086e-06	13.1016	3.23534	0.853825	3.78924	0.000151111	0.000561688		NA	NA	NA	NA	NA	NA	NA	NA	NA	NA	NA	NA	NA	NA	NA	'35.2'	'not assigned.not annotated'	' no hits & (original description: none)'
Vitvi00g00813	4064.38	1.20784	0.34094	3.54268	0.000396086	0.00185726	4064.38	3.3777	0.304624	11.0881	1.4334e-28	1.04723e-26	4064.38	1.71925	0.304908	5.63859	1.71451e-08	1.30892e-07	4064.38	2.0513	0.304284	6.74142	1.56844e-11	2.07939e-10	VIT_00s0587g00030	AT4G27460.1	1e-68	259.2	1-to-1	NA	AT4G27460.1	Cystathionine beta-synthase (CBS) family protein	NA	"CBSX5"	NA	CBS domain containing protein 5	Cystathionine beta-synthase (CBS) family protein%3B CONTAINS InterPro DOMAIN/s: Cystathionine beta-synthase%2C core (InterPro:IPR000644)%3B BEST Arabidopsis thaliana protein match is: CBS domain-containing protein (TAIR:AT5G53750.1)%3B Has 145 Blast hits to 145 proteins in 17 species: Archae - 0%3B Bacteria - 0%3B Metazoa - 1%3B Fungi - 0%3B Plants - 144%3B Viruses - 0%3B Other Eukaryotes - 0 (so…	*****	gene:2123998.UniProt:Q84WQ5	NA	'35.1'	'not assigned.annotated'	'CBS domain-containing protein CBSX5 OS=Arabidopsis thaliana (sp|q84wq5|cbsx5_arath : 246.0)'
Vitvi00g00814	605.753	-0.10088	0.129974	-0.776157	0.437656	0.566601	605.753	-0.0118767	0.118179	-0.100498	0.919949	0.945059	605.753	-0.348518	0.11442	-3.04596	0.00231942	0.00637351	605.753	-0.117667	0.118265	-0.994944	0.319764	0.425604	VIT_00s0587g00040	NA	NA	NA	NA	NA	NA	NA	NA	NA	NA	NA	NA	NA	NA	NA	'35.2'	'not assigned.not annotated'	' no hits & (original description: none)'
Vitvi00g00816	436.537	-0.537645	0.189006	-2.84459	0.00444685	0.014649	436.537	-0.875819	0.169302	-5.17312	2.30218e-07	1.62167e-06	436.537	0.0258171	0.16892	0.152837	0.878527	0.915362	436.537	-1.011	0.166948	-6.05581	1.39715e-09	1.36732e-08	VIT_00s0590g00010	AT3G51790.1	1.9e-74	277.7	1-to-1	NA	AT3G51790.1	transmembrane protein G1P-related 1	Encodes a heme-binding protein located in the mitochondrial inner membrane that is involved in cytochrome c maturation.	"G1"	ATG1.transmembrane protein G1P-related 1.AtCCME.A. thaliana homolog of E. coli CcmE	transmembrane protein G1P-related 1	transmembrane protein G1P-related 1 (TG1)%3B FUNCTIONS IN: molecular_function unknown%3B INVOLVED IN: cytochrome complex assembly%2C protein-heme linkage%3B LOCATED IN: plasma membrane%3B EXPRESSED IN: 22 plant structures%3B EXPRESSED DURING: 13 growth stages%3B CONTAINS InterPro DOMAIN/s: CcmE/CycJ protein (InterPro:IPR004329)%2C Nucleic acid-binding%2C OB-fold (InterPro:IPR012340)%3B Has 3203 B…	*****	PMID:15807784.gene:2074362.UniProt:Q96326	NA	'2.4.4.2.4'	'Cellular respiration.oxidative phosphorylation.cytochrome c.CCM cytochrome c maturation system (system I).CcmE heme chaperone component'	'Cellular respiration.oxidative phosphorylation.cytochrome c.CCM cytochrome c maturation system (system I).CcmE heme chaperone component (original description: none)'
Vitvi00g00817	4.0438	-2.87087	1.63672	-1.75404	0.0794236	0.154056	4.0438	-4.25845	1.43645	-2.96457	0.00303111	0.00846245	4.0438	-4.62282	1.42394	-3.24651	0.00116831	0.00346183	4.0438	-4.38448	1.43898	-3.04693	0.00231192	0.00636739		AT5G01710.1	3.1e-19	92.4	1-to-1	NA	AT5G01710.1	methyltransferase	NA	NA	NA	NA	methyltransferases%3B FUNCTIONS IN: methyltransferase activity%3B INVOLVED IN: metabolic process%3B LOCATED IN: endomembrane system%3B EXPRESSED IN: sperm cell%2C male gametophyte%2C pollen tube%3B EXPRESSED DURING: L mature pollen stage%2C M germinated pollen stage%3B CONTAINS InterPro DOMAIN/s: Methyltransferase FkbM (InterPro:IPR006342)%2C Methyltransferase type 11 (InterPro:IPR013216)%3B BEST…	*****	gene:2149789.UniProt:Q9M005	NA	'35.2'	'not assigned.not annotated'	' no hits & (original description: none)'
Vitvi00g00822	0.150555	0	6.58482	0	1	NA	0.150555	0	5.88922	0	1	NA	0.150555	-0.546823	5.85573	-0.0933825	0.9256	NA	0.150555	0.836044	5.88968	0.141951	0.887119	NA	VIT_00s0595g00010	AT1G11340.1	5.6e-114	411	1-to-1	NA	AT1G11340.1	G-type lectin S-receptor-like Serine/Threonine-kinase	NA	NA	NA	NA	S-locus lectin protein kinase family protein%3B FUNCTIONS IN: in 6 functions%3B INVOLVED IN: protein amino acid phosphorylation%2C recognition of pollen%3B LOCATED IN: endomembrane system%3B EXPRESSED IN: 8 plant structures%3B EXPRESSED DURING: 6 growth stages%3B CONTAINS InterPro DOMAIN/s: Curculin-like (mannose-binding) lectin (InterPro:IPR001480)%2C PAN-2 domain (InterPro:IPR013227)%2C Apple-l…	***	gene:2200110.UniProt:Q9ZT07	NA	'50.2.7'	'Enzyme classification.EC_2 transferases.EC_2.7 transferase transferring phosphorus-containing group'	'G-type lectin S-receptor-like serine/threonine-protein kinase At1g11410 OS=Arabidopsis thaliana (sp|q9lpz3|y1141_arath : 368.0) & Enzyme classification.EC_2 transferases.EC_2.7 transferase transferring phosphorus-containing group(50.2.7 : 56.0) (original description: none)'
Vitvi00g00824	1141.21	-1.43823	0.844124	-1.70382	0.0884156	0.167982	1141.21	1.61773	0.755851	2.14028	0.0323321	0.0648921	1141.21	0.180304	0.755281	0.238725	0.811319	0.867581	1141.21	1.33411	0.75676	1.76292	0.0779132	0.13446		NA	NA	NA	NA	NA	NA	NA	NA	NA	NA	NA	NA	NA	NA	NA	'35.2'	'not assigned.not annotated'	' no hits & (original description: none)'
Vitvi00g00825	0	NA	NA	NA	NA	NA	0	NA	NA	NA	NA	NA	0	NA	NA	NA	NA	NA	0	NA	NA	NA	NA	NA		NA	NA	NA	NA	NA	NA	NA	NA	NA	NA	NA	NA	NA	NA	NA	'35.2'	'not assigned.not annotated'	' no hits & (original description: none)'
Vitvi00g00858	0.112863	0	6.58482	0	1	NA	0.112863	-0.846946	5.88922	-0.143813	0.885648	NA	0.112863	1.97358	5.87802	0.335757	0.737054	NA	0.112863	0	5.88968	0	1	NA		NA	NA	NA	NA	NA	NA	NA	NA	NA	NA	NA	NA	NA	NA	NA	'35.2'	'not assigned.not annotated'	' no hits & (original description: none)'
Vitvi00g00859	122.788	-0.162616	0.357311	-0.455109	0.649031	0.752	122.788	0.531091	0.31536	1.68408	0.0921661	0.156536	122.788	0.403818	0.327821	1.23183	0.218014	0.318593	122.788	0.994494	0.320938	3.0987	0.00194368	0.00547462	VIT_00s0632g00010	AT4G16750.1	9.7e-38	156	1-to-1	NA	AT4G16750.1	Integrase-type DNA-binding superfamily protein	encodes a member of the DREB subfamily A-4 of ERF/AP2 transcription factor family. The protein contains one AP2 domain. There are 17 members in this subfamily including TINY.	NA	NA	NA	Integrase-type DNA-binding superfamily protein%3B CONTAINS InterPro DOMAIN/s: DNA-binding%2C integrase-type (InterPro:IPR016177)%2C Pathogenesis-related transcriptional factor/ERF%2C DNA-binding (InterPro:IPR001471)%3B BEST Arabidopsis thaliana protein match is: ERF family protein 38 (TAIR:AT2G35700.1)%3B Has 5863 Blast hits to 5700 proteins in 248 species: Archae - 0%3B Bacteria - 0%3B Metazoa -…	*****	PMID:9192694.PMID:7919989.PMID:11118137.PMID:16307362.PMID:16280546.PMID:16407444.gene:2129110.UniProt:Q9SUK8	VviERF039	'15.7.7.2'	'RNA biosynthesis.transcriptional activation.AP2/ERF superfamily.DREB-type transcription factor'	'RNA biosynthesis.transcriptional activation.AP2/ERF superfamily.DREB-type transcription factor (original description: none)'
Vitvi00g00864	41.4164	0.215824	0.297248	0.726074	0.467793	0.594741	41.4164	0.334325	0.284806	1.17387	0.240447	0.34128	41.4164	0.32956	0.27034	1.21906	0.222823	0.324273	41.4164	0.823671	0.305884	2.69276	0.00708629	0.017049	VIT_00s0646g00010	AT5G09430.1	4.1e-10	63.5	1-to-1	NA	AT5G09430.1	alpha/beta-Hydrolases superfamily protein	NA	NA	NA	NA	alpha/beta-Hydrolases superfamily protein%3B CONTAINS InterPro DOMAIN/s: Alpha/beta hydrolase fold-1 (InterPro:IPR000073)%3B BEST Arabidopsis thaliana protein match is: alpha/beta-Hydrolases superfamily protein (TAIR:AT4G39955.1)%3B Has 8280 Blast hits to 8277 proteins in 1491 species: Archae - 97%3B Bacteria - 6100%3B Metazoa - 351%3B Fungi - 79%3B Plants - 382%3B Viruses - 0%3B Other Eukaryotes…	*****	gene:2184776.UniProt:Q4PSG2	NA	'35.2'	'not assigned.not annotated'	' no hits & (original description: none)'
Vitvi00g00869	1901.96	-0.403415	0.127457	-3.16511	0.00155025	0.00608741	1901.96	-0.195073	0.113572	-1.71761	0.0858672	0.1476	1901.96	-0.301145	0.113246	-2.65921	0.00783231	0.0188052	1901.96	-0.322255	0.113276	-2.84486	0.00444314	0.011305	VIT_00s0657g00010	AT3G49680.1	1.7e-12	73.6	1-to-many	AT3G49680.2	AT3G49680.1	branched-chain aminotransferase 3	Encodes a chloroplast branched-chain amino acid aminotransferase. Complements the yeast leu/iso-leu/val auxotrophy mutant.	"BCAT3"	ATBCAT-3	branched-chain aminotransferase 3	branched-chain aminotransferase 3 (BCAT3)%3B FUNCTIONS IN: branched-chain-amino-acid transaminase activity%2C catalytic activity%3B INVOLVED IN: branched chain family amino acid metabolic process%2C metabolic process%3B LOCATED IN: chloroplast%3B EXPRESSED IN: 23 plant structures%3B EXPRESSED DURING: 13 growth stages%3B CONTAINS InterPro DOMAIN/s: Aminotransferase%2C class IV (InterPro:IPR001544)…	****	PMID:18162591.PMID:18431481.PMID:19542295.PMID:21166475.gene:3703073.UniProt:Q9M401	NA	'35.2'	'not assigned.not annotated'	' no hits & (original description: none)'
Vitvi00g00870	421.244	-0.149762	0.176644	-0.847817	0.39654	0.527653	421.244	-0.353751	0.159921	-2.21204	0.0269642	0.0557736	421.244	0.211523	0.157224	1.34536	0.178509	0.270605	421.244	0.49258	0.161835	3.04372	0.00233673	0.00642148	VIT_00s0659g00010	AT5G48520.1	1.8e-22	108.2	1-to-many	AT5G48520.2	AT5G48520.1	HAUS augmin-like complex subunit	Encodes AUGMIN subunit3 (AUG3)%2C a homolog of animal dim gamma-tubulin 3/human augmin-like complex%2C subunit 3. Plays a critical role in microtubule organization during plant cell division.	"AUG3"	AtAUG3	augmin 3	unknown protein%3B Has 609 Blast hits to 593 proteins in 129 species: Archae - 0%3B Bacteria - 41%3B Metazoa - 390%3B Fungi - 40%3B Plants - 64%3B Viruses - 0%3B Other Eukaryotes - 74 (source: NCBI BLink).	****	PMID:14505352.gene:2166070.UniProt:Q0WQE7	NA	'35.1'	'not assigned.annotated'	'AUGMIN subunit 3 OS=Arabidopsis thaliana (sp|q0wqe7|aug3_arath : 108.0)'
Vitvi00g00879	1.17857	1.75874	1.59121	1.10528	0.269038	NA	1.17857	1.57543	1.80438	0.873112	0.382602	0.490003	1.17857	0.0163882	1.36841	0.0119761	0.990445	0.996835	1.17857	-0.118557	1.81902	-0.0651764	0.948034	0.9674		NA	NA	NA	NA	NA	NA	NA	NA	NA	NA	NA	NA	NA	NA	NA	'35.2'	'not assigned.not annotated'	' no hits & (original description: none)'
Vitvi00g00880	229.394	-0.285082	0.173527	-1.64287	0.10041	0.185655	229.394	-0.445285	0.156098	-2.8526	0.00433634	0.0115427	229.394	0.515255	0.15726	3.27645	0.00105121	0.00315227	229.394	0.403141	0.165817	2.43124	0.0150473	0.0329846		AT2G20710.1	2.6e-85	314.3	1-to-1	NA	AT2G20710.1	Tetratricopeptide repeat (TPR)-like superfamily protein	NA	NA	NA	NA	Tetratricopeptide repeat (TPR)-like superfamily protein%3B INVOLVED IN: biological_process unknown%3B LOCATED IN: mitochondrion%3B EXPRESSED IN: 15 plant structures%3B EXPRESSED DURING: 7 growth stages%3B CONTAINS InterPro DOMAIN/s: Pentatricopeptide repeat (InterPro:IPR002885)%3B BEST Arabidopsis thaliana protein match is: Tetratricopeptide repeat (TPR)-like superfamily protein (TAIR:AT1G28020.1…	****	gene:2051378.UniProt:Q9SKU6	NA	'35.1'	'not assigned.annotated'	'Pentatricopeptide repeat-containing protein At2g20710. mitochondrial OS=Arabidopsis thaliana (sp|q9sku6|pp166_arath : 295.0)'
Vitvi00g00885	3.94139	-3.51292	2.04031	-1.72176	0.0851136	0.16288	3.94139	-3.84286	1.87171	-2.05312	0.0400609	0.0779203	3.94139	-5.83363	1.81852	-3.20789	0.00133711	0.00390776	3.94139	-5.38754	1.83217	-2.94052	0.00327658	0.00865214	VIT_00s0679g00010	AT1G17840.1	7.8e-32	137.1	1-to-1	NA	AT1G17840.1	white-brown complex-like protein	Encodes a plasma membrane-localized ATP-binding cassette transporter%2C that is required for cutin transport to the extracellular matrix.	"ABCG11"	ATWBC11.ARABIDOPSIS THALIANA WHITE-BROWN COMPLEX HOMOLOG PROTEIN 11.AtABCG11.COF1.CUTICULAR DEFECT AND ORGAN FUSION 1.DSO.DESPERADO.WBC11.white-brown complex homolog protein 11	ATP-binding cassette G11	white-brown complex homolog protein 11 (WBC11)%3B FUNCTIONS IN: ATPase activity%2C coupled to transmembrane movement of substances%2C fatty acid transporter activity%3B INVOLVED IN: cutin transport%2C fatty acid transport%3B LOCATED IN: plasma membrane%2C external side of plasma membrane%3B EXPRESSED IN: 26 plant structures%3B EXPRESSED DURING: 13 growth stages%3B CONTAINS InterPro DOMAIN/s: ATPa…	****	PMID:12972649.PMID:14730060.PMID:17317660.PMID:17727615.PMID:17951461.PMID:17989085.gene:2030897.UniProt:Q8RXN0	NA	'35.1'	'not assigned.annotated'	'ABC transporter G family member 11 OS=Arabidopsis thaliana (sp|q8rxn0|ab11g_arath : 111.0)'
Vitvi00g00889	3.86278	-0.350578	0.990125	-0.354074	0.723283	0.810395	3.86278	0.523594	0.938837	0.557705	0.577046	0.671316	3.86278	-3.23986	1.08592	-2.98352	0.00284957	0.00766529	3.86278	-0.590197	0.976327	-0.604507	0.545506	0.645647	VIT_00s0695g00010	AT2G27920.1	8.5e-15	78.6	1-to-many	AT2G27920.2.AT2G27920.3	AT2G27920.1	serine carboxypeptidase-like 51	NA	"SCPL51"	NA	serine carboxypeptidase-like 51	serine carboxypeptidase-like 51 (SCPL51)%3B FUNCTIONS IN: serine-type carboxypeptidase activity%3B INVOLVED IN: proteolysis%3B LOCATED IN: endomembrane system%3B EXPRESSED IN: 22 plant structures%3B EXPRESSED DURING: 13 growth stages%3B CONTAINS InterPro DOMAIN/s: Peptidase S10%2C serine carboxypeptidase (InterPro:IPR001563)%2C Peptidase S10%2C serine carboxypeptidase%2C active site (InterPro:IPR…	****	gene:2057872.UniProt:Q67Y83	NA	'19.5.2.2'	'Protein degradation.peptidase families.serine-type peptidase activities.serine carboxypeptidase'	'Protein degradation.peptidase families.serine-type peptidase activities.serine carboxypeptidase (original description: none)'
Vitvi00g00893	2.89189	0.367016	1.05511	0.347845	0.727957	0.813753	2.89189	-1.15003	1.25432	-0.91685	0.359221	0.466648	2.89189	0.12773	1.02345	0.124803	0.90068	0.931729	2.89189	0.98617	1.107	0.890853	0.373008	0.480735	GSVIVT00007786001	AT4G17616.1	7.5e-26	114.8	1-to-1	NA	AT4G17616.1	Pentatricopeptide repeat (PPR) superfamily protein	NA	NA	NA	NA	Pentatricopeptide repeat (PPR) superfamily protein%3B FUNCTIONS IN: molecular_function unknown%3B INVOLVED IN: biological_process unknown%3B LOCATED IN: cellular_component unknown%3B CONTAINS InterPro DOMAIN/s: Pentatricopeptide repeat (InterPro:IPR002885)%3B BEST Arabidopsis thaliana protein match is: Pentatricopeptide repeat (PPR) superfamily protein (TAIR:AT1G03100.1)%3B Has 30201 Blast hits t…	*****	gene:4515101876.UniProt:B3H672	NA	'35.1'	'not assigned.annotated'	'Pentatricopeptide repeat-containing protein At4g17616 OS=Arabidopsis thaliana (sp|b3h672|pp317_arath : 93.6)'
Vitvi00g00894	112.315	-0.371958	0.410916	-0.905191	0.365364	0.496064	112.315	-0.561419	0.380764	-1.47445	0.14036	0.221329	112.315	-3.12271	0.357938	-8.72418	2.68123e-18	6.83933e-17	112.315	-3.20965	0.373311	-8.59779	8.12631e-18	2.35215e-16	VIT_00s0705g00010	AT4G37370.1	5.8e-114	409.8	1-to-1	NA	AT4G37370.1	cytochrome P450%2C family 81%2C subfamily D%2C polypeptide 8	member of CYP81D	"CYP81D8"	NA	cytochrome P450%2C family 81%2C subfamily D%2C polypeptide 8	cytochrome P450%2C family 81%2C subfamily D%2C polypeptide 8 (CYP81D8)%3B FUNCTIONS IN: electron carrier activity%2C monooxygenase activity%2C iron ion binding%2C oxygen binding%2C heme binding%3B INVOLVED IN: response to karrikin%3B LOCATED IN: endoplasmic reticulum%2C plasma membrane%3B EXPRESSED IN: 20 plant structures%3B EXPRESSED DURING: 13 growth stages%3B CONTAINS InterPro DOMAIN/s: Cytoch…	****	PMID:16618929.PMID:17317660.gene:2126341.UniProt:Q9SZT7	NA	'50.1.13'	'Enzyme classification.EC_1 oxidoreductases.EC_1.14 oxidoreductase acting on paired donor with incorporation or reduction of molecular oxygen'	'Enzyme classification.EC_1 oxidoreductases.EC_1.14 oxidoreductase acting on paired donor with incorporation or reduction of molecular oxygen(50.1.13 : 270.4) & Cytochrome P450 81D1 OS=Arabidopsis thaliana (sp|q9fg65|c81d1_arath : 266.0) (original description: none)'
Vitvi00g00897	607.482	-0.696449	0.1325	-5.25623	1.47041e-07	1.54326e-06	607.482	-0.886885	0.119381	-7.42906	1.0937e-13	2.01511e-12	607.482	-0.607301	0.116613	-5.20784	1.91052e-07	1.22928e-06	607.482	-0.544251	0.119468	-4.55561	5.22335e-06	2.68276e-05	VIT_00s0710g00020	AT4G40010.1	1.3e-39	163.7	1-to-1	NA	AT4G40010.1	SNF1-related protein kinase 2.7	encodes a member of SNF1-related protein kinases (SnRK2) whose activity is activated by ionic (salt) and non-ionic (mannitol) osmotic stress.	"SNRK2.7"	SRK2F	SNF1-related protein kinase 2.7	SNF1-related protein kinase 2.7 (SNRK2.7)%3B CONTAINS InterPro DOMAIN/s: Protein kinase%2C ATP binding site (InterPro:IPR017441)%2C Serine/threonine-protein kinase domain (InterPro:IPR002290)%2C Serine/threonine-protein kinase-like domain (InterPro:IPR017442)%2C Protein kinase-like domain (InterPro:IPR011009)%2C Serine/threonine-protein kinase%2C active site (InterPro:IPR008271)%2C Protein kinase…	****	PMID:15292193.PMID:18433157.gene:2140103.UniProt:Q9SMQ4	NA	'50.2.7'	'Enzyme classification.EC_2 transferases.EC_2.7 transferase transferring phosphorus-containing group'	'Serine/threonine-protein kinase SRK2A OS=Physcomitrella patens subsp. patens (sp|a9tf79|srk2a_phypa : 134.0) & Enzyme classification.EC_2 transferases.EC_2.7 transferase transferring phosphorus-containing group(50.2.7 : 19.7) (original description: none)'
Vitvi00g00898	0	NA	NA	NA	NA	NA	0	NA	NA	NA	NA	NA	0	NA	NA	NA	NA	NA	0	NA	NA	NA	NA	NA		NA	NA	NA	NA	NA	NA	NA	NA	NA	NA	NA	NA	NA	NA	NA	'35.2'	'not assigned.not annotated'	' no hits & (original description: none)'
Vitvi00g00903	121.611	-2.83772	0.851312	-3.33335	0.000858064	0.00363866	121.611	1.11209	0.771625	1.44123	0.149519	0.232736	121.611	1.2692	0.76357	1.66219	0.0964753	0.163266	121.611	1.45213	0.784599	1.85079	0.0641991	0.114286	VIT_00s0733g00010	ATMG01190.1	5.2e-258	888.6	1-to-1	NA	ATMG01190.1	ATP synthase subunit 1	ATPase subunit 1	"ATP1"	NA	ATP synthase subunit 1	ATP synthase subunit 1 (ATP1)%3B FUNCTIONS IN: copper ion binding%2C cobalt ion binding%2C zinc ion binding%3B INVOLVED IN: response to oxidative stress%3B LOCATED IN: mitochondrion%2C cell wall%3B EXPRESSED IN: cotyledon%2C guard cell%2C seed%2C leaf%3B CONTAINS InterPro DOMAIN/s: ATPase%2C alpha/beta subunit%2C nucleotide-binding domain%2C active site (InterPro:IPR020003)%2C ATPase%2C F1 comple…	*****	PMID:12492832.PMID:16287169.PMID:18385124.gene:1009022758	NA	'2.4.6.2.1'	'Cellular respiration.oxidative phosphorylation.ATP synthase complex.peripheral MF1 subcomplex.subunit alpha'	'Cellular respiration.oxidative phosphorylation.ATP synthase complex.peripheral MF1 subcomplex.subunit alpha (original description: none)'
Vitvi00g00908	5.75843	-1.21454	0.786404	-1.54442	0.122487	0.216209	5.75843	-0.463043	0.699649	-0.661822	0.508086	0.609007	5.75843	0.0635277	0.711153	0.0893306	0.928819	0.951508	5.75843	-0.501399	0.857859	-0.584478	0.558899	0.657656	VIT_00s0740g00010	AT5G39830.2	4.1e-15	81.6	1-to-1	NA	AT5G39830.2	Trypsin family protein with PDZ domain-containing protein	Encodes DEG8. Forms a hexamer with DEG5 in the thylakoid lumen. Involved in the cleavage of photodamaged D2 protein of photosystem II (PSII). Recombinant DEG8 is proteolytically active toward both a model substrate (beta-casein) and photodamaged D1 protein of photosystem II.	"DEG8"	DEGP8.DEG PROTEASE 8	degradation of periplasmic proteins 8	DEG8%3B FUNCTIONS IN: serine-type peptidase activity%2C peptidase activity%3B INVOLVED IN: photosystem II repair%2C proteolysis%3B LOCATED IN: thylakoid%2C chloroplast thylakoid lumen%2C chloroplast%3B EXPRESSED IN: 22 plant structures%3B EXPRESSED DURING: 13 growth stages%3B CONTAINS InterPro DOMAIN/s: Serine/cysteine peptidase%2C trypsin-like (InterPro:IPR009003)%2C Peptidase S1C%2C HrtA/DegP2/…	****	PMID:16648217.PMID:17449806.PMID:18431481.gene:1006229201.UniProt:F4KFV6	NA	'19.5.2.3'	'Protein degradation.peptidase families.serine-type peptidase activities.Deg protease'	'Protein degradation.peptidase families.serine-type peptidase activities.Deg protease (original description: none)'
Vitvi00g00910	84.6962	-0.87296	0.443568	-1.96804	0.0490635	0.105232	84.6962	-0.462813	0.381773	-1.21227	0.225408	0.324042	84.6962	-1.36216	0.393134	-3.46486	0.000530502	0.00170729	84.6962	-1.34105	0.383886	-3.49336	0.000476978	0.00157346	VIT_00s0743g00020	AT1G11350.1	3.8e-96	352.4	1-to-1	NA	AT1G11350.1	S-domain-1 13	NA	"SD1-13"	CBRLK1.CALMODULIN-BINDING RECEPTOR-LIKE PROTEIN KINASE.RKS2	S-domain-1 13	S-domain-1 13 (SD1-13)%3B CONTAINS InterPro DOMAIN/s: Curculin-like (mannose-binding) lectin (InterPro:IPR001480)%2C Apple-like (InterPro:IPR003609)%2C Protein kinase%2C ATP binding site (InterPro:IPR017441)%2C PAN-2 domain (InterPro:IPR013227)%2C Serine/threonine-protein kinase domain (InterPro:IPR002290)%2C Serine-threonine/tyrosine-protein kinase (InterPro:IPR001245)%2C Serine/threonine-protei…	****	gene:2200150.UniProt:Q9LPZ9	NA	'50.2.7'	'Enzyme classification.EC_2 transferases.EC_2.7 transferase transferring phosphorus-containing group'	'G-type lectin S-receptor-like serine/threonine-protein kinase At1g11330 OS=Arabidopsis thaliana (sp|q9sxb8|y1133_arath : 353.0) & Enzyme classification.EC_2 transferases.EC_2.7 transferase transferring phosphorus-containing group(50.2.7 : 65.4) (original description: none)'
Vitvi00g00911	282.635	-0.529038	0.307206	-1.7221	0.0850521	0.162797	282.635	-0.344794	0.27046	-1.27484	0.202366	0.296803	282.635	-0.754761	0.272657	-2.76817	0.00563716	0.0140788	282.635	-1.12358	0.271909	-4.13219	3.59316e-05	0.000153549	VIT_00s0743g00030	AT1G11330.1	7.8e-40	163.7	1-to-many	AT1G11330.2.AT1G11330.3	AT1G11330.1	S-locus lectin protein kinase family protein	NA	NA	NA	NA	S-locus lectin protein kinase family protein%3B FUNCTIONS IN: in 6 functions%3B INVOLVED IN: protein amino acid phosphorylation%2C recognition of pollen%3B LOCATED IN: plasma membrane%3B EXPRESSED IN: 23 plant structures%3B EXPRESSED DURING: 13 growth stages%3B CONTAINS InterPro DOMAIN/s: Curculin-like (mannose-binding) lectin (InterPro:IPR001480)%2C PAN-2 domain (InterPro:IPR013227)%2C Apple-lik…	****	PMID:16618929.PMID:17317660.PMID:17644812.PMID:21075962.gene:2202053.UniProt:F4I8U6	NA	'50.2.7'	'Enzyme classification.EC_2 transferases.EC_2.7 transferase transferring phosphorus-containing group'	'G-type lectin S-receptor-like serine/threonine-protein kinase At1g11330 OS=Arabidopsis thaliana (sp|q9sxb8|y1133_arath : 160.0) & Enzyme classification.EC_2 transferases.EC_2.7 transferase transferring phosphorus-containing group(50.2.7 : 43.2) (original description: none)'
Vitvi00g00918	6.66864	2.74842	0.934048	2.94248	0.00325592	0.0113108	6.66864	2.564	0.865002	2.96416	0.00303513	0.00847281	6.66864	3.67883	1.07162	3.43296	0.00059704	0.00190108	6.66864	3.46416	1.05558	3.28176	0.0010316	0.00312464	VIT_00s0760g00010	AT3G60330.1	1.7e-38	158.7	1-to-many	AT3G60330.2.AT3G60330.3.AT3G60330.4	AT3G60330.1	H[+]-ATPase 7	NA	"HA7"	AHA7.H(+)-ATPase 7	H(+)-ATPase 7	H(+)-ATPase 7 (HA7)%3B FUNCTIONS IN: hydrogen-exporting ATPase activity%2C phosphorylative mechanism%3B INVOLVED IN: cation transport%2C metabolic process%2C ATP biosynthetic process%3B LOCATED IN: plasma membrane%3B EXPRESSED IN: 7 plant structures%3B EXPRESSED DURING: L mature pollen stage%2C M germinated pollen stage%2C 4 anthesis%2C petal differentiation and expansion stage%3B CONTAINS InterP…	****	PMID:17317660.gene:3702915.UniProt:Q9LY32	NA	'35.1'	'not assigned.annotated'	'ATPase 7. plasma membrane-type OS=Arabidopsis thaliana (sp|q9ly32|pma7_arath : 97.1)'
Vitvi00g00919	107.877	-0.438737	0.318877	-1.37588	0.168858	0.276815	107.877	-0.5913	0.29032	-2.03672	0.0416782	0.0805086	107.877	-0.328972	0.28341	-1.16076	0.245738	0.350086	107.877	-2.13054	0.29297	-7.27223	3.53589e-13	5.82718e-12		AT4G23160.2	1.1e-58	225.3	1-to-many	AT4G23160.3	AT4G23160.2	cysteine-rich RECEPTOR-like kinase	NA	"CRK8"	NA	cysteine-rich RLK (RECEPTOR-like protein kinase) 8	NA	NA	NA	NA	'35.1'	'not assigned.annotated'	'Retrovirus-related Pol polyprotein from transposon TNT 1-94 OS=Nicotiana tabacum (sp|p10978|polx_tobac : 246.0)'
Vitvi00g00920	3.01677	4.93257	2.88055	1.71237	0.0868287	0.165568	3.01677	1.69043	2.80325	0.603025	0.546492	0.644441	3.01677	-0.666384	2.32251	-0.286924	0.77417	0.839187	3.01677	-1.08753	2.83346	-0.383818	0.701114	0.777921		AT1G11330.1	5e-17	85.1	1-to-many	AT1G11330.2.AT1G11330.3	AT1G11330.1	S-locus lectin protein kinase family protein	NA	NA	NA	NA	S-locus lectin protein kinase family protein%3B FUNCTIONS IN: in 6 functions%3B INVOLVED IN: protein amino acid phosphorylation%2C recognition of pollen%3B LOCATED IN: plasma membrane%3B EXPRESSED IN: 23 plant structures%3B EXPRESSED DURING: 13 growth stages%3B CONTAINS InterPro DOMAIN/s: Curculin-like (mannose-binding) lectin (InterPro:IPR001480)%2C PAN-2 domain (InterPro:IPR013227)%2C Apple-lik…	****	PMID:16618929.PMID:17317660.PMID:17644812.PMID:21075962.gene:2202053.UniProt:F4I8U6	NA	'50.2.7'	'Enzyme classification.EC_2 transferases.EC_2.7 transferase transferring phosphorus-containing group'	'G-type lectin S-receptor-like serine/threonine-protein kinase At1g11330 OS=Arabidopsis thaliana (sp|q9sxb8|y1133_arath : 84.0) & Enzyme classification.EC_2 transferases.EC_2.7 transferase transferring phosphorus-containing group(50.2.7 : 28.9) (original description: none)'
Vitvi00g00921	474.669	-0.241362	0.203235	-1.1876	0.234992	0.356968	474.669	-0.307134	0.182141	-1.68624	0.0917493	0.155944	474.669	-0.1433	0.181259	-0.79058	0.429189	0.54163	474.669	0.738382	0.187678	3.93431	8.34354e-05	0.000329402	VIT_00s0762g00040	AT1G11330.1	2.6e-149	527.7	1-to-1	NA	AT1G11330.1	S-locus lectin protein kinase family protein	NA	NA	NA	NA	S-locus lectin protein kinase family protein%3B FUNCTIONS IN: in 6 functions%3B INVOLVED IN: protein amino acid phosphorylation%2C recognition of pollen%3B LOCATED IN: plasma membrane%3B EXPRESSED IN: 23 plant structures%3B EXPRESSED DURING: 13 growth stages%3B CONTAINS InterPro DOMAIN/s: Curculin-like (mannose-binding) lectin (InterPro:IPR001480)%2C PAN-2 domain (InterPro:IPR013227)%2C Apple-lik…	****	PMID:16618929.PMID:17317660.PMID:17644812.PMID:21075962.gene:2202053.UniProt:F4I8U6	NA	'50.2.7'	'Enzyme classification.EC_2 transferases.EC_2.7 transferase transferring phosphorus-containing group'	'G-type lectin S-receptor-like serine/threonine-protein kinase At1g11330 OS=Arabidopsis thaliana (sp|q9sxb8|y1133_arath : 379.0) & Enzyme classification.EC_2 transferases.EC_2.7 transferase transferring phosphorus-containing group(50.2.7 : 74.8) (original description: none)'
Vitvi00g00922	12929.3	0.156687	0.103144	1.51911	0.128736	0.224807	12929.3	0.0653623	0.0923352	0.707881	0.479019	0.582757	12929.3	0.0177929	0.0921971	0.192988	0.846969	0.893286	12929.3	0.225633	0.0923742	2.4426	0.0145819	0.0320724	VIT_00s0769g00010	AT3G25230.1	9.5e-104	377.5	1-to-many	AT3G25230.2	AT3G25230.1	rotamase FKBP 1	Encodes a a high molecular weight member of the FK506 binding protein (FKBP) family. It has three FKBP12-like domains%2C tetratricopeptide repeats%2C and a putative calmodulin binding domain. Modulates thermotolerance by interacting with HSP90.1 and affecting the accumulation of HsfA2-regulated sHSPs. Belongs to one of the 36 carboxylate clamp (CC)-tetratricopeptide repeat (TPR) proteins (Prasad …	"ROF1"	ATFKBP62.FKBP62.FK506 BINDING PROTEIN 62	rotamase FKBP 1	rotamase FKBP 1 (ROF1)%3B FUNCTIONS IN: FK506 binding%2C peptidyl-prolyl cis-trans isomerase activity%2C calmodulin binding%3B INVOLVED IN: response to cadmium ion%2C response to heat%2C response to wounding%3B LOCATED IN: nucleus%2C cytoplasm%3B EXPRESSED IN: 26 plant structures%3B EXPRESSED DURING: 15 growth stages%3B CONTAINS InterPro DOMAIN/s: Tetratricopeptide TPR-1 (InterPro:IPR001440)%2C T…	****	PMID:11782485.PMID:16502469.gene:2090264.UniProt:Q38931	NA	'18.13.5.2'	'Protein modification.protein folding and quality control.protein folding catalyst activities.FKBP protein folding catalyst'	'Protein modification.protein folding and quality control.protein folding catalyst activities.FKBP protein folding catalyst (original description: none)'
Vitvi00g00935	733.393	0.319295	0.15448	2.0669	0.0387437	0.0869332	733.393	0.123621	0.141235	0.875287	0.381418	0.488693	733.393	-0.836921	0.137926	-6.06791	1.29589e-09	1.17972e-08	733.393	-1.18098	0.140895	-8.38197	5.20501e-17	1.40535e-15	VIT_00s0804g00010	AT5G66820.1	8.6e-31	133.7	1-to-1	NA	AT5G66820.1	transmembrane protein	NA	NA	NA	NA	unknown protein%3B Has 35333 Blast hits to 34131 proteins in 2444 species: Archae - 798%3B Bacteria - 22429%3B Metazoa - 974%3B Fungi - 991%3B Plants - 531%3B Viruses - 0%3B Other Eukaryotes - 9610 (source: NCBI BLink).	****	gene:2175023.UniProt:F4K253	NA	'35.2'	'not assigned.not annotated'	' no hits & (original description: none)'
Vitvi00g00936	652.447	-0.73405	0.179688	-4.08514	4.40504e-05	0.000270277	652.447	-0.546364	0.161331	-3.3866	0.000707646	0.00234628	652.447	0.0623432	0.160346	0.388804	0.697422	0.778554	652.447	0.490901	0.164372	2.98652	0.00282174	0.0075666	VIT_00s0804g00020	AT4G37080.1	4.2e-23	109	1-to-1	NA	AT4G37080.1	ternary complex factor MIP1 leucine-zipper protein (Protein of unknown function%2C DUF547)	NA	NA	NA	NA	Protein of unknown function%2C DUF547%3B CONTAINS InterPro DOMAIN/s: Protein of unknown function DUF547 (InterPro:IPR006869)%3B BEST Arabidopsis thaliana protein match is: Protein of unknown function%2C DUF547 (TAIR:AT5G42690.2)%3B Has 1854 Blast hits to 1696 proteins in 329 species: Archae - 6%3B Bacteria - 397%3B Metazoa - 313%3B Fungi - 62%3B Plants - 588%3B Viruses - 2%3B Other Eukaryotes - 4…	****	gene:2115163.UniProt:Q8RY64	NA	'35.2'	'not assigned.not annotated'	' no hits & (original description: none)'
Vitvi00g00937	47.3791	0.816931	0.390588	2.09154	0.0364796	0.0827855	47.3791	1.21697	0.351639	3.46085	0.00053847	0.00183937	47.3791	0.646529	0.335599	1.9265	0.0540425	0.100124	47.3791	0.959198	0.362397	2.64682	0.00812532	0.019184	VIT_00s0809g00030	AT5G41150.1	4.4e-30	130.2	1-to-1	NA	AT5G41150.1	Restriction endonuclease%2C type II-like superfamily protein	Confers resistance to UV radiation. Homolog of the human xeroderma pigmentosum group F DNA repair and yeast Rad1 proteins	"UVH1"	ATRAD1.RAD1	ULTRAVIOLET HYPERSENSITIVE 1	ULTRAVIOLET HYPERSENSITIVE 1 (UVH1)%3B CONTAINS InterPro DOMAIN/s: ERCC4 domain (InterPro:IPR006166)%2C Restriction endonuclease%2C type II-like (InterPro:IPR011335)%2C DNA repair nuclease%2C XPF-type/Helicase (InterPro:IPR020819)%3B Has 1807 Blast hits to 1807 proteins in 277 species: Archae - 0%3B Bacteria - 0%3B Metazoa - 736%3B Fungi - 347%3B Plants - 385%3B Viruses - 0%3B Other Eukaryotes - …	****	PMID:12383497.gene:2163010.UniProt:Q9LKI5	NA	'35.1'	'not assigned.annotated'	'DNA repair endonuclease UVH1 OS=Arabidopsis thaliana (sp|q9lki5|xpf_arath : 130.0)'
Vitvi00g00938	1.95926	0.539884	1.98363	0.27217	0.785491	0.857911	1.95926	1.73014	2.30572	0.75037	0.453032	0.558382	1.95926	-0.741379	1.80835	-0.409976	0.681823	0.765818	1.95926	0.959218	1.8908	0.507309	0.611938	0.703644		AT5G39830.2	1.7e-14	81.6	1-to-1	NA	AT5G39830.2	Trypsin family protein with PDZ domain-containing protein	Encodes DEG8. Forms a hexamer with DEG5 in the thylakoid lumen. Involved in the cleavage of photodamaged D2 protein of photosystem II (PSII). Recombinant DEG8 is proteolytically active toward both a model substrate (beta-casein) and photodamaged D1 protein of photosystem II.	"DEG8"	DEGP8.DEG PROTEASE 8	degradation of periplasmic proteins 8	DEG8%3B FUNCTIONS IN: serine-type peptidase activity%2C peptidase activity%3B INVOLVED IN: photosystem II repair%2C proteolysis%3B LOCATED IN: thylakoid%2C chloroplast thylakoid lumen%2C chloroplast%3B EXPRESSED IN: 22 plant structures%3B EXPRESSED DURING: 13 growth stages%3B CONTAINS InterPro DOMAIN/s: Serine/cysteine peptidase%2C trypsin-like (InterPro:IPR009003)%2C Peptidase S1C%2C HrtA/DegP2/…	****	PMID:16648217.PMID:17449806.PMID:18431481.gene:1006229201.UniProt:F4KFV6	NA	'19.5.2.3'	'Protein degradation.peptidase families.serine-type peptidase activities.Deg protease'	'Protein degradation.peptidase families.serine-type peptidase activities.Deg protease (original description: none)'
Vitvi00g00943	1.46333	-2.04134	3.54126	-0.576444	0.564315	0.681735	1.46333	-2.98408	3.12736	-0.954187	0.339989	0.447123	1.46333	-3.44565	3.097	-1.11258	0.26589	0.372905	1.46333	-3.95345	3.07749	-1.28464	0.19892	0.290921	VIT_00s0824g00010	AT4G37840.1	1.1e-38	160.6	1-to-1	NA	AT4G37840.1	hexokinase-like 3	Encodes a putative hexokinase.	"HKL3"	NA	hexokinase-like 3	hexokinase-like 3 (HKL3)%3B CONTAINS InterPro DOMAIN/s: Hexokinase%2C N-terminal (InterPro:IPR022672)%2C Hexokinase%2C C-terminal (InterPro:IPR022673)%2C Hexokinase (InterPro:IPR001312)%3B BEST Arabidopsis thaliana protein match is: hexokinase 1 (TAIR:AT4G29130.1)%3B Has 2260 Blast hits to 1998 proteins in 311 species: Archae - 0%3B Bacteria - 87%3B Metazoa - 1224%3B Fungi - 560%3B Plants - 263%3…	***	PMID:17234224.gene:2137563.UniProt:Q9T071	NA	'35.1'	'not assigned.annotated'	'Probable hexokinase-like 2 protein OS=Arabidopsis thaliana (sp|q9t071|hxkl2_arath : 161.0)'
Vitvi00g00944	8.73383	1.55173	0.846087	1.83401	0.0666526	0.134028	8.73383	1.6108	0.908408	1.77321	0.0761939	0.133757	8.73383	-1.95434	0.767095	-2.54772	0.0108429	0.0249515	8.73383	-1.54481	0.829814	-1.86164	0.0626544	0.111959	VIT_00s0824g00020	AT4G37850.1	2.2e-26	118.6	1-to-many	AT4G37850.2	AT4G37850.1	basic helix-loop-helix (bHLH) DNA-binding superfamily protein	NA	NA	NA	NA	basic helix-loop-helix (bHLH) DNA-binding superfamily protein%3B FUNCTIONS IN: DNA binding%2C sequence-specific DNA binding transcription factor activity%3B INVOLVED IN: regulation of transcription%3B LOCATED IN: nucleus%3B CONTAINS InterPro DOMAIN/s: Helix-loop-helix DNA-binding domain (InterPro:IPR001092)%2C Helix-loop-helix DNA-binding (InterPro:IPR011598)%3B BEST Arabidopsis thaliana protein …	****	PMID:11118137.PMID:12679534.gene:2137573.UniProt:Q9T072	NA	'15.7.33'	'RNA biosynthesis.transcriptional activation.bHLH transcription factor'	'RNA biosynthesis.transcriptional activation.bHLH transcription factor (original description: none)'
Vitvi00g00946	0	NA	NA	NA	NA	NA	0	NA	NA	NA	NA	NA	0	NA	NA	NA	NA	NA	0	NA	NA	NA	NA	NA		NA	NA	NA	NA	NA	NA	NA	NA	NA	NA	NA	NA	NA	NA	NA	'35.2'	'not assigned.not annotated'	' no hits & (original description: none)'
Vitvi00g00947	0.3009	0	5.92045	0	1	NA	0.3009	1.07644	5.2951	0.203289	0.838909	NA	0.3009	2.67289	5.24036	0.510058	0.610011	NA	0.3009	2.3381	5.22952	0.447096	0.654806	NA		NA	NA	NA	NA	NA	NA	NA	NA	NA	NA	NA	NA	NA	NA	NA	'35.2'	'not assigned.not annotated'	' no hits & (original description: none)'
Vitvi00g00948	30.122	-6.46294	1.38106	-4.67969	2.87308e-06	2.31459e-05	30.122	-6.10108	1.05666	-5.77394	7.74377e-09	7.10513e-08	30.122	-8.30098	1.2066	-6.87964	6.00035e-12	7.6669e-11	30.122	-7.40805	1.20808	-6.13207	8.67409e-10	8.80754e-09	VIT_00s0835g00020	AT5G53180.1	2.6e-51	199.9	1-to-1	NA	AT5G53180.1	polypyrimidine tract-binding protein 2	Encodes one of the two polypyrimidine tract-binding (PTB) protein homologs in the Arabidopsis genome. Double mutants have defects in pollen germination.	"PTB2"	ATPTB2.POLYPYRIMIDINE TRACT-BINDING PROTEIN 2	polypyrimidine tract-binding protein 2	polypyrimidine tract-binding protein 2 (PTB2)%3B FUNCTIONS IN: RNA binding%2C nucleotide binding%2C nucleic acid binding%3B INVOLVED IN: pollen germination%2C regulation of RNA splicing%2C regulation of translation%3B LOCATED IN: nucleus%2C cytoplasmic mRNA processing body%2C cytoplasm%3B EXPRESSED IN: 31 plant structures%3B EXPRESSED DURING: 16 growth stages%3B CONTAINS InterPro DOMAIN/s: RNA re…	****	PMID:19122186.gene:2163745.UniProt:Q9FGL9	NA	'35.1'	'not assigned.annotated'	'Polypyrimidine tract-binding protein homolog 2 OS=Arabidopsis thaliana (sp|q9fgl9|ptbp2_arath : 200.0)'
Vitvi00g00950	159.872	0.618526	0.191717	3.22625	0.00125422	0.00505114	159.872	0.50114	0.180284	2.77973	0.00544042	0.0140797	159.872	0.238792	0.170797	1.39811	0.162081	0.250086	159.872	0.260717	0.182783	1.42637	0.153761	0.23618	VIT_00s0841g00010	AT3G49725.1	3.6e-10	64.3	1-to-1	NA	AT3G49725.1	GTP-binding protein%2C HflX	NA	NA	NA	NA	GTP-binding protein%2C HflX%3B FUNCTIONS IN: GTP binding%3B LOCATED IN: intracellular%2C chloroplast%3B CONTAINS InterPro DOMAIN/s: GTP1/OBG (InterPro:IPR006073)%2C GTP-binding protein%2C HflX (InterPro:IPR016496)%2C GTP-binding protein%2C HSR1-related (InterPro:IPR002917)%3B BEST Arabidopsis thaliana protein match is: GTP-binding protein%2C HflX (TAIR:AT5G57960.1)%3B Has 11258 Blast hits to 1124…	*****	PMID:18650403.gene:5019474299.UniProt:Q0WTB4	NA	'35.2'	'not assigned.not annotated'	' no hits & (original description: none)'
Vitvi00g00951	29.7374	0.820798	0.338477	2.42497	0.0153096	0.0408165	29.7374	0.937552	0.348139	2.69304	0.00708046	0.017694	29.7374	0.668448	0.310768	2.15095	0.0314799	0.0630568	29.7374	0.346948	0.331932	1.04524	0.295913	0.399878	VIT_00s0841g00030	AT3G49710.1	1.6e-76	285.8	1-to-1	NA	AT3G49710.1	Pentatricopeptide repeat (PPR) superfamily protein	NA	NA	NA	NA	Pentatricopeptide repeat (PPR) superfamily protein%3B CONTAINS InterPro DOMAIN/s: Pentatricopeptide repeat (InterPro:IPR002885)%3B BEST Arabidopsis thaliana protein match is: pentatricopeptide (PPR) repeat-containing protein (TAIR:AT2G22070.1)%3B Has 44619 Blast hits to 14217 proteins in 272 species: Archae - 0%3B Bacteria - 17%3B Metazoa - 134%3B Fungi - 114%3B Plants - 43678%3B Viruses - 0%3B O…	*****	gene:2097364.UniProt:Q9M2Y7	NA	'35.1'	'not assigned.annotated'	'Pentatricopeptide repeat-containing protein At3g49710 OS=Arabidopsis thaliana (sp|q9m2y7|pp274_arath : 280.0)'
Vitvi00g00956	0.0629241	0	6.58482	0	1	NA	0.0629241	0	5.88922	0	1	NA	0.0629241	-1.33505	5.86651	-0.227571	0.81998	NA	0.0629241	0	5.88968	0	1	NA	VIT_00s0848g00010	AT5G10290.1	7.6e-67	254.2	1-to-many	AT5G10290.2	AT5G10290.1	leucine-rich repeat transmembrane protein kinase family protein	NA	NA	NA	NA	leucine-rich repeat transmembrane protein kinase family protein%3B FUNCTIONS IN: kinase activity%3B INVOLVED IN: protein amino acid phosphorylation%3B LOCATED IN: plasma membrane%3B EXPRESSED IN: 21 plant structures%3B EXPRESSED DURING: 13 growth stages%3B CONTAINS InterPro DOMAIN/s: Protein kinase%2C ATP binding site (InterPro:IPR017441)%2C Protein kinase%2C catalytic domain (InterPro:IPR000719)…	****	PMID:17317660.PMID:21075962.gene:2145406.UniProt:C0LGT1	NA	'50.2.7'	'Enzyme classification.EC_2 transferases.EC_2.7 transferase transferring phosphorus-containing group'	'LRR receptor kinase SERK2 OS=Oryza sativa subsp. japonica (sp|q6k4t4|serk4_orysj : 249.0) & Enzyme classification.EC_2 transferases.EC_2.7 transferase transferring phosphorus-containing group(50.2.7 : 54.8) (original description: none)'
Vitvi00g00958	0	NA	NA	NA	NA	NA	0	NA	NA	NA	NA	NA	0	NA	NA	NA	NA	NA	0	NA	NA	NA	NA	NA		ATMG00660.1	3.9e-27	119	1-to-1	NA	ATMG00660.1	hypothetical protein	NA	"ORF149"	NA	NA	unknown protein.	*****	gene:1009022750	NA	'35.2'	'not assigned.not annotated'	' no hits & (original description: none)'
Vitvi00g00959	1.80742	3.29022	1.46136	2.25147	0.0243558	0.0595508	1.80742	1.4241	1.42571	0.998869	0.317858	0.425243	1.80742	-1.97027	1.50413	-1.30991	0.190227	0.285004	1.80742	1.76585	1.85864	0.950078	0.342073	0.448912	VIT_00s0854g00030	NA	NA	NA	NA	NA	NA	NA	NA	NA	NA	NA	NA	NA	NA	NA	'35.2'	'not assigned.not annotated'	' no hits & (original description: none)'
Vitvi00g00960	20.092	-2.43741	0.977227	-2.49422	0.0126236	0.034853	20.092	1.53281	0.898537	1.70589	0.0880278	0.150763	20.092	0.225434	0.890211	0.253237	0.800085	0.85915	20.092	0.220886	0.933464	0.236631	0.812943	0.867012	VIT_00s0854g00040	ATMG00580.1	6.4e-60	228	1-to-1	NA	ATMG00580.1	NADH dehydrogenase subunit 4	NADH dehydrogenase subunit 4	"NAD4"	NA	NADH dehydrogenase subunit 4	NADH dehydrogenase subunit 4 (NAD4)%3B CONTAINS InterPro DOMAIN/s: NADH-quinone oxidoreductase%2C chain M (InterPro:IPR010227)%2C NADH:ubiquinone oxidoreductase%2C chain 4 (InterPro:IPR003918)%2C NADH:ubiquinone/plastoquinone oxidoreductase (InterPro:IPR001750)%3B BEST Arabidopsis thaliana protein match is: NADH-Ubiquinone/plastoquinone (complex I) protein (TAIR:ATCG01050.1).	****	PMID:16621844.PMID:18189341.gene:1009022761	NA	'35.1'	'not assigned.annotated'	'NADH-ubiquinone oxidoreductase chain 4 OS=Brassica campestris (sp|q04050|nu4m_bracm : 232.0)'
Vitvi00g00961	1.31253	1.15477	2.02257	0.570943	0.568038	0.684838	1.31253	1.20865	1.6805	0.719224	0.472003	0.575631	1.31253	0.0629339	1.81122	0.0347467	0.972282	0.983397	1.31253	0.374885	1.95819	0.191445	0.848177	0.893741		NA	NA	NA	NA	NA	NA	NA	NA	NA	NA	NA	NA	NA	NA	NA	'35.2'	'not assigned.not annotated'	' no hits & (original description: none)'
Vitvi00g00972	0	NA	NA	NA	NA	NA	0	NA	NA	NA	NA	NA	0	NA	NA	NA	NA	NA	0	NA	NA	NA	NA	NA		NA	NA	NA	NA	NA	NA	NA	NA	NA	NA	NA	NA	NA	NA	NA	'35.2'	'not assigned.not annotated'	' no hits & (original description: none)'
Vitvi00g00973	483.326	-1.41919	0.551409	-2.57376	0.01006	0.0289552	483.326	-0.234027	0.493399	-0.474316	0.635274	0.721636	483.326	-0.521489	0.494255	-1.0551	0.29138	0.400205	483.326	0.746305	0.495631	1.50577	0.132127	0.208045	VIT_00s0873g00010	AT2G07675.1	4.6e-60	228.4	1-to-many	ATMG00980.1	AT2G07675.1	Ribosomal protein S12/S23 family protein	NA	NA	NA	NA	Ribosomal protein S12/S23 family protein%3B FUNCTIONS IN: structural constituent of ribosome%3B INVOLVED IN: translation%3B LOCATED IN: ribosome%2C small ribosomal subunit%2C intracellular%3B CONTAINS InterPro DOMAIN/s: Ribosomal protein S12/S23 (InterPro:IPR006032)%2C Nucleic acid-binding%2C OB-fold (InterPro:IPR012340)%2C Nucleic acid-binding%2C OB-fold-like (InterPro:IPR016027)%2C Ribosomal pr…	*****	gene:3437281	NA	'17.6.1.2.10'	'Protein biosynthesis.organelle translation machineries.mitochondrial ribosome.small subunit proteome.mtRPS12 component'	'Protein biosynthesis.organelle translation machineries.mitochondrial ribosome.small subunit proteome.mtRPS12 component (original description: none)'
Vitvi00g00974	305.942	-1.84729	0.665405	-2.77619	0.00550007	0.0175196	305.942	-0.416925	0.594779	-0.700976	0.483318	0.586782	305.942	-0.830174	0.596372	-1.39204	0.16391	0.252503	305.942	0.930877	0.598165	1.55622	0.119656	0.191634	VIT_00s0873g00020	ATMG00990.1	4.2e-56	216.5	1-to-1	NA	ATMG00990.1	NADH dehydrogenase 3	NADH dehydrogenase subunit 3	"NAD3"	NA	NADH dehydrogenase 3	NADH dehydrogenase 3 (NAD3)%3B CONTAINS InterPro DOMAIN/s: NADH:ubiquinone/plastoquinone oxidoreductase%2C chain 3 (InterPro:IPR000440)%3B BEST Arabidopsis thaliana protein match is: NADH:ubiquinone/plastoquinone oxidoreductase%2C chain 3 protein (TAIR:AT2G07751.1).	*****	gene:1009022726	NA	'2.4.1.3.3'	'Cellular respiration.oxidative phosphorylation.NADH dehydrogenase complex.proton translocation (module P).ND3/NQO7 component'	'Cellular respiration.oxidative phosphorylation.NADH dehydrogenase complex.proton translocation (module P).ND3/NQO7 component (original description: none)'
Vitvi00g00980	0	NA	NA	NA	NA	NA	0	NA	NA	NA	NA	NA	0	NA	NA	NA	NA	NA	0	NA	NA	NA	NA	NA		NA	NA	NA	NA	NA	NA	NA	NA	NA	NA	NA	NA	NA	NA	NA	'35.2'	'not assigned.not annotated'	' no hits & (original description: none)'
Vitvi00g00983	634.168	-0.0180923	0.193155	-0.0936676	0.925373	0.954336	634.168	0.414857	0.172442	2.40577	0.0161383	0.0359764	634.168	-0.453172	0.171347	-2.64476	0.0081748	0.019496	634.168	0.175838	0.170986	1.02838	0.303773	0.408619	VIT_00s0897g00010	AT5G10290.1	5.9e-06	50.8	1-to-many	AT5G10290.2	AT5G10290.1	leucine-rich repeat transmembrane protein kinase family protein	NA	NA	NA	NA	leucine-rich repeat transmembrane protein kinase family protein%3B FUNCTIONS IN: kinase activity%3B INVOLVED IN: protein amino acid phosphorylation%3B LOCATED IN: plasma membrane%3B EXPRESSED IN: 21 plant structures%3B EXPRESSED DURING: 13 growth stages%3B CONTAINS InterPro DOMAIN/s: Protein kinase%2C ATP binding site (InterPro:IPR017441)%2C Protein kinase%2C catalytic domain (InterPro:IPR000719)…	****	PMID:17317660.PMID:21075962.gene:2145406.UniProt:C0LGT1	NA	'35.1'	'not assigned.annotated'	'Probable LRR receptor-like serine/threonine-protein kinase At5g10290 OS=Arabidopsis thaliana (sp|c0lgt1|y5129_arath : 81.6)'
Vitvi00g00985	0	NA	NA	NA	NA	NA	0	NA	NA	NA	NA	NA	0	NA	NA	NA	NA	NA	0	NA	NA	NA	NA	NA		NA	NA	NA	NA	NA	NA	NA	NA	NA	NA	NA	NA	NA	NA	NA	'35.2'	'not assigned.not annotated'	' no hits & (original description: none)'
Vitvi00g00988	2.62023	0.262091	2.04118	0.128402	0.897831	0.936608	2.62023	5.49852	1.60323	3.42964	0.000604385	0.00204131	2.62023	2.61445	1.70412	1.53419	0.124982	0.20203	2.62023	5.21622	1.60389	3.25222	0.00114506	0.00342616		AT5G45210.1	1.5e-10	63.5	1-to-many	AT5G45210.2.AT5G45210.4.AT5G45210.5	AT5G45210.1	Disease resistance protein (TIR-NBS-LRR class) family	NA	NA	NA	NA	Disease resistance protein (TIR-NBS-LRR class) family%3B FUNCTIONS IN: transmembrane receptor activity%2C ATP binding%3B INVOLVED IN: signal transduction%2C apoptosis%2C defense response%2C innate immune response%3B LOCATED IN: intrinsic to membrane%3B EXPRESSED IN: root%3B CONTAINS InterPro DOMAIN/s: NB-ARC (InterPro:IPR002182)%2C Leucine-rich repeat (InterPro:IPR001611)%2C Toll-Interleukin rece…	**	gene:2153367.UniProt:Q9FKE4	NA	'35.2'	'not assigned.not annotated'	' no hits & (original description: none)'
Vitvi00g00989	0.0556529	-1.01186	6.56148	-0.154213	0.877442	NA	0.0556529	0	5.88922	0	1	NA	0.0556529	0	5.88968	0	1	NA	0.0556529	0	5.88968	0	1	NA	VIT_00s0908g00010	NA	NA	NA	NA	NA	NA	NA	NA	NA	NA	NA	NA	NA	NA	NA	'35.2'	'not assigned.not annotated'	' no hits & (original description: none)'
Vitvi00g00993	3.89924	0.485508	0.972265	0.499357	0.617528	0.727	3.89924	2.82765	1.15753	2.44284	0.0145723	0.0329778	3.89924	0.555216	0.884914	0.627424	0.530381	0.63721	3.89924	1.1989	1.11546	1.07481	0.282461	0.384898		NA	NA	NA	NA	NA	NA	NA	NA	NA	NA	NA	NA	NA	NA	NA	'35.1'	'not assigned.annotated'	'RNA-directed DNA polymerase homolog OS=Oenothera berteroana (sp|p31843|rrpo_oenbe : 111.0)'
Vitvi00g00994	146.236	0.314228	0.184215	1.70576	0.0880519	0.16741	146.236	0.380361	0.170186	2.23496	0.0254197	0.0530975	146.236	0.389878	0.166339	2.34388	0.0190843	0.0409	146.236	0.405227	0.173306	2.33821	0.0193764	0.0410737	VIT_00s0918g00010	AT2G17670.1	1.8e-65	248.4	1-to-many	AT2G17670.2	AT2G17670.1	Tetratricopeptide repeat (TPR)-like superfamily protein	NA	NA	NA	NA	Tetratricopeptide repeat (TPR)-like superfamily protein%3B CONTAINS InterPro DOMAIN/s: Pentatricopeptide repeat (InterPro:IPR002885)%3B BEST Arabidopsis thaliana protein match is: Pentatricopeptide repeat (PPR) superfamily protein (TAIR:AT3G53700.1)%3B Has 45396 Blast hits to 13729 proteins in 280 species: Archae - 5%3B Bacteria - 33%3B Metazoa - 451%3B Fungi - 602%3B Plants - 42971%3B Viruses - …	*****	gene:2827890.UniProt:Q84J71	NA	'35.1'	'not assigned.annotated'	'Pentatricopeptide repeat-containing protein At2g17670 OS=Arabidopsis thaliana (sp|q84j71|pp161_arath : 261.0)'
Vitvi00g00996	0.640007	0	5.49883	0	1	NA	0.640007	-2.65646	4.83352	-0.549591	0.5826	NA	0.640007	-0.840452	4.81619	-0.174505	0.861468	0.903683	0.640007	-0.975851	4.81115	-0.202831	0.839267	NA		AT4G35660.1	1.2e-29	128.6	1-to-1	NA	AT4G35660.1	selection/upkeep of intraepithelial T-cells protein%2C putative (DUF241)	NA	NA	NA	NA	Arabidopsis protein of unknown function (DUF241)%3B CONTAINS InterPro DOMAIN/s: Protein of unknown function DUF241%2C plant (InterPro:IPR004320)%3B BEST Arabidopsis thaliana protein match is: Arabidopsis protein of unknown function (DUF241) (TAIR:AT4G35690.1)%3B Has 1807 Blast hits to 1807 proteins in 277 species: Archae - 0%3B Bacteria - 0%3B Metazoa - 736%3B Fungi - 347%3B Plants - 385%3B Virus…	*****	gene:2128007.UniProt:O81797	NA	'35.2'	'not assigned.not annotated'	' no hits & (original description: none)'
Vitvi00g00997	311.746	-0.181457	0.238745	-0.760044	0.447228	0.575254	311.746	-0.538793	0.217469	-2.47756	0.0132283	0.0303384	311.746	-0.514338	0.213032	-2.41437	0.0157623	0.0346736	311.746	-0.471038	0.21845	-2.15627	0.0310623	0.0617989	VIT_00s0920g00010	AT5G47690.1	4.1e-34	144.8	1-to-many	AT5G47690.2.AT5G47690.3.AT5G47690.4	AT5G47690.1	binding protein	NA	NA	PDS5	NA	binding%3B FUNCTIONS IN: binding%3B INVOLVED IN: biological_process unknown%3B LOCATED IN: mitochondrion%2C nucleus%2C chloroplast%3B EXPRESSED IN: cotyledon%2C guard cell%2C cultured cell%3B CONTAINS InterPro DOMAIN/s: Armadillo-type fold (InterPro:IPR016024)%3B BEST Arabidopsis thaliana protein match is: ARM repeat superfamily protein (TAIR:AT1G77600.2)%3B Has 16808 Blast hits to 11211 proteins…	****	PMID:14671022.PMID:15028209.PMID:18433157.PMID:21166475.gene:3441454.UniProt:B6EUB3	NA	'35.2'	'not assigned.not annotated'	' no hits & (original description: none)'
Vitvi00g01001	7.27032	0.355644	1.33441	0.266519	0.78984	0.860941	7.27032	1.53377	1.3873	1.10558	0.268908	0.373109	7.27032	-2.86946	1.25637	-2.28393	0.0223755	0.0469176	7.27032	-0.968506	1.23656	-0.783226	0.433495	0.540144	VIT_00s0927g00010	AT2G22750.3	1.2e-10	66.2	1-to-many	AT2G22750.4.AT2G22750.5	AT2G22750.3	basic helix-loop-helix (bHLH) DNA-binding superfamily protein	NA	NA	NA	NA	NA	NA	NA	NA	'15.7.33'	'RNA biosynthesis.transcriptional activation.bHLH transcription factor'	'RNA biosynthesis.transcriptional activation.bHLH transcription factor (original description: none)'
Vitvi00g01005	0	NA	NA	NA	NA	NA	0	NA	NA	NA	NA	NA	0	NA	NA	NA	NA	NA	0	NA	NA	NA	NA	NA		NA	NA	NA	NA	NA	NA	NA	NA	NA	NA	NA	NA	NA	NA	NA	'35.2'	'not assigned.not annotated'	' no hits & (original description: none)'
Vitvi00g01011	3020.25	0.266472	0.106811	2.49479	0.012603	0.0348178	3020.25	0.193685	0.0958911	2.01984	0.0433995	0.0833052	3020.25	0.0659913	0.0951658	0.693436	0.488036	0.597479	3020.25	0.289144	0.0960811	3.00938	0.00261785	0.00708993	VIT_00s0958g00020	AT3G25230.1	8.5e-60	230.3	1-to-many	AT3G25230.2	AT3G25230.1	rotamase FKBP 1	Encodes a a high molecular weight member of the FK506 binding protein (FKBP) family. It has three FKBP12-like domains%2C tetratricopeptide repeats%2C and a putative calmodulin binding domain. Modulates thermotolerance by interacting with HSP90.1 and affecting the accumulation of HsfA2-regulated sHSPs. Belongs to one of the 36 carboxylate clamp (CC)-tetratricopeptide repeat (TPR) proteins (Prasad …	"ROF1"	ATFKBP62.FKBP62.FK506 BINDING PROTEIN 62	rotamase FKBP 1	rotamase FKBP 1 (ROF1)%3B FUNCTIONS IN: FK506 binding%2C peptidyl-prolyl cis-trans isomerase activity%2C calmodulin binding%3B INVOLVED IN: response to cadmium ion%2C response to heat%2C response to wounding%3B LOCATED IN: nucleus%2C cytoplasm%3B EXPRESSED IN: 26 plant structures%3B EXPRESSED DURING: 15 growth stages%3B CONTAINS InterPro DOMAIN/s: Tetratricopeptide TPR-1 (InterPro:IPR001440)%2C T…	****	PMID:11782485.PMID:16502469.gene:2090264.UniProt:Q38931	NA	'18.13.5.2'	'Protein modification.protein folding and quality control.protein folding catalyst activities.FKBP protein folding catalyst'	'Protein modification.protein folding and quality control.protein folding catalyst activities.FKBP protein folding catalyst (original description: none)'
Vitvi00g01013	334.467	1.34938	0.17511	7.70591	1.29917e-14	3.86997e-13	334.467	0.801878	0.160206	5.0053	5.57762e-07	3.65712e-06	334.467	0.689779	0.158086	4.36331	1.28106e-05	5.84443e-05	334.467	0.511156	0.163441	3.12746	0.00176324	0.00502439	VIT_00s0961g00020	AT3G50590.1	2.4e-28	125.9	1-to-many	AT3G50590.2	AT3G50590.1	Transducin/WD40 repeat-like superfamily protein	NA	NA	NA	NA	Transducin/WD40 repeat-like superfamily protein%3B FUNCTIONS IN: nucleotide binding%3B INVOLVED IN: biological_process unknown%3B LOCATED IN: plasma membrane%3B EXPRESSED IN: 23 plant structures%3B EXPRESSED DURING: 13 growth stages%3B CONTAINS InterPro DOMAIN/s: WD40 repeat 2 (InterPro:IPR019782)%2C WD40 repeat-like-containing domain (InterPro:IPR011046)%2C WD40-repeat-containing domain (InterPr…	**	PMID:17317660.PMID:21166475.gene:2098764.UniProt:F4J0P2	NA	'35.2'	'not assigned.not annotated'	' no hits & (original description: none)'
Vitvi00g01016	0.699884	0	4.15711	0	1	NA	0.699884	-0.84705	3.71812	-0.227817	0.819789	NA	0.699884	-2.11838	3.47742	-0.609181	0.542404	0.648394	0.699884	1.60409	3.6832	0.435514	0.663189	NA		AT4G35730.1	1e-09	60.5	1-to-1	NA	AT4G35730.1	Regulator of Vps4 activity in the MVB pathway protein	NA	NA	NA	NA	Regulator of Vps4 activity in the MVB pathway protein%3B CONTAINS InterPro DOMAIN/s: Protein of unknown function DUF292%2C eukaryotic (InterPro:IPR005061)%3B BEST Arabidopsis thaliana protein match is: Regulator of Vps4 activity in the MVB pathway protein (TAIR:AT1G34220.2)%3B Has 794 Blast hits to 754 proteins in 186 species: Archae - 0%3B Bacteria - 4%3B Metazoa - 200%3B Fungi - 205%3B Plants -…	****	PMID:14671022.gene:2127987.UniProt:F4JNS8	NA	'35.2'	'not assigned.not annotated'	' no hits & (original description: none)'
Vitvi00g01018	104.944	-1.36971	0.238172	-5.75091	8.8762e-09	1.15227e-07	104.944	-0.818417	0.203528	-4.02114	5.79161e-05	0.00024996	104.944	-1.24907	0.204527	-6.10712	1.01442e-09	9.36909e-09	104.944	-0.833761	0.203263	-4.10189	4.0979e-05	0.000173115	VIT_00s0983g00010	AT5G09430.1	4.5e-81	301.6	1-to-1	NA	AT5G09430.1	alpha/beta-Hydrolases superfamily protein	NA	NA	NA	NA	alpha/beta-Hydrolases superfamily protein%3B CONTAINS InterPro DOMAIN/s: Alpha/beta hydrolase fold-1 (InterPro:IPR000073)%3B BEST Arabidopsis thaliana protein match is: alpha/beta-Hydrolases superfamily protein (TAIR:AT4G39955.1)%3B Has 8280 Blast hits to 8277 proteins in 1491 species: Archae - 97%3B Bacteria - 6100%3B Metazoa - 351%3B Fungi - 79%3B Plants - 382%3B Viruses - 0%3B Other Eukaryotes…	*****	gene:2184776.UniProt:Q4PSG2	NA	'35.2'	'not assigned.not annotated'	' no hits & (original description: none)'
Vitvi00g01019	2.8693	-2.71248	2.2334	-1.2145	0.224555	0.345178	2.8693	-0.0264331	1.74989	-0.0151056	0.987948	0.993063	2.8693	-2.47588	1.92621	-1.28537	0.198665	0.295178	2.8693	-1.80628	1.53834	-1.17418	0.240324	0.33873		NA	NA	NA	NA	NA	NA	NA	NA	NA	NA	NA	NA	NA	NA	NA	'35.2'	'not assigned.not annotated'	' no hits & (original description: none)'
Vitvi00g01020	81.5939	-1.72758	0.612087	-2.82245	0.00476587	0.0155275	81.5939	-0.487845	0.534477	-0.912752	0.361373	0.46888	81.5939	-3.43689	0.551814	-6.22834	4.71405e-10	4.59201e-09	81.5939	-1.81425	0.522139	-3.47464	0.000511531	0.0016747	VIT_00s0988g00010	AT1G10150.1	1.8e-89	327.8	1-to-1	NA	AT1G10150.1	Carbohydrate-binding protein	NA	NA	NA	NA	Carbohydrate-binding protein%3B FUNCTIONS IN: carbohydrate binding%3B LOCATED IN: mitochondrion%3B EXPRESSED IN: 24 plant structures%3B EXPRESSED DURING: 15 growth stages%3B BEST Arabidopsis thaliana protein match is: Carbohydrate-binding protein (TAIR:AT1G59510.1)%3B Has 114 Blast hits to 112 proteins in 22 species: Archae - 0%3B Bacteria - 3%3B Metazoa - 0%3B Fungi - 0%3B Plants - 110%3B Viruse…	*****	gene:2012802.UniProt:Q9SY57	NA	'35.1'	'not assigned.annotated'	'Protein PHLOEM PROTEIN 2-LIKE A10 OS=Arabidopsis thaliana (sp|q9sy57|p2a10_arath : 319.0)'
Vitvi00g01021	0	NA	NA	NA	NA	NA	0	NA	NA	NA	NA	NA	0	NA	NA	NA	NA	NA	0	NA	NA	NA	NA	NA		NA	NA	NA	NA	NA	NA	NA	NA	NA	NA	NA	NA	NA	NA	NA	'35.2'	'not assigned.not annotated'	' no hits & (original description: none)'
Vitvi00g01022	268.862	0.0140781	0.345923	0.0406972	0.967537	0.982023	268.862	-0.0147707	0.317765	-0.0464831	0.962925	0.975393	268.862	-1.42713	0.309493	-4.6112	4.0036e-06	2.01238e-05	268.862	-0.9024	0.316741	-2.84901	0.00438548	0.0111875	VIT_00s1003g00010	AT1G78020.1	4.2e-16	84.3	1-to-1	NA	AT1G78020.1	senescence-associated family protein%2C putative (DUF581)	NA	NA	NA	NA	Protein of unknown function (DUF581)%3B EXPRESSED IN: 23 plant structures%3B EXPRESSED DURING: 13 growth stages%3B CONTAINS InterPro DOMAIN/s: Protein of unknown function DUF581 (InterPro:IPR007650)%3B BEST Arabidopsis thaliana protein match is: Protein of unknown function (DUF581) (TAIR:AT1G22160.1)%3B Has 525 Blast hits to 525 proteins in 19 species: Archae - 0%3B Bacteria - 0%3B Metazoa - 0%3B…	*****	gene:2029420.UniProt:Q9SGZ8	NA	'27.3.3'	'Multi-process regulation.SnRK1 metabolic regulator system.FLZ SnRK1-interacting factor'	'Multi-process regulation.SnRK1 metabolic regulator system.FLZ SnRK1-interacting factor (original description: none)'
Vitvi00g01028	0.0346053	0	6.58482	0	1	NA	0.0346053	0	5.88922	0	1	NA	0.0346053	1.38641	5.88968	0.235397	0.813901	NA	0.0346053	0	5.88968	0	1	NA		NA	NA	NA	NA	NA	NA	NA	NA	NA	NA	NA	NA	NA	NA	NA	'35.2'	'not assigned.not annotated'	' no hits & (original description: none)'
Vitvi00g01029	0.0368319	-0.176311	6.58027	-0.0267939	0.978624	NA	0.0368319	0	5.88922	0	1	NA	0.0368319	0	5.88968	0	1	NA	0.0368319	0	5.88968	0	1	NA		NA	NA	NA	NA	NA	NA	NA	NA	NA	NA	NA	NA	NA	NA	NA	'35.2'	'not assigned.not annotated'	' no hits & (original description: none)'
Vitvi00g01030	0.018551	-0.0842869	6.5823	-0.0128051	0.989783	NA	0.018551	0	5.88922	0	1	NA	0.018551	0	5.88968	0	1	NA	0.018551	0	5.88968	0	1	NA		NA	NA	NA	NA	NA	NA	NA	NA	NA	NA	NA	NA	NA	NA	NA	'35.2'	'not assigned.not annotated'	' no hits & (original description: none)'
Vitvi00g01036	465	1.10643	0.242682	4.55918	5.13533e-06	3.93404e-05	465	1.43235	0.218124	6.56668	5.14496e-11	6.57535e-10	465	0.612768	0.218372	2.80608	0.00501485	0.0126878	465	0.417602	0.218191	1.91393	0.0556289	0.101519		AT5G66850.1	9e-24	111.7	1-to-many	AT5G66850.2	AT5G66850.1	mitogen-activated protein kinase kinase kinase 5	member of MEKK subfamily	"MAPKKK5"	NA	mitogen-activated protein kinase kinase kinase 5	mitogen-activated protein kinase kinase kinase 5 (MAPKKK5)%3B FUNCTIONS IN: protein serine/threonine kinase activity%2C protein kinase activity%2C kinase activity%2C ATP binding%3B INVOLVED IN: protein amino acid phosphorylation%3B LOCATED IN: plasma membrane%3B EXPRESSED IN: 22 plant structures%3B EXPRESSED DURING: 15 growth stages%3B CONTAINS InterPro DOMAIN/s: Protein kinase%2C ATP binding sit…	****	PMID:17317660.gene:2174968.UniProt:Q9C5H5	NA	'35.1'	'not assigned.annotated'	'Mitogen-activated protein kinase kinase kinase 5 OS=Arabidopsis thaliana (sp|q9c5h5|m3k5g_arath : 118.0)'
Vitvi00g01038	0	NA	NA	NA	NA	NA	0	NA	NA	NA	NA	NA	0	NA	NA	NA	NA	NA	0	NA	NA	NA	NA	NA		AT3G12940.1	2.2e-72	270	1-to-many	AT3G12940.2	AT3G12940.1	2-oxoglutarate (2OG) and Fe(II)-dependent oxygenase superfamily protein	NA	NA	NA	NA	2-oxoglutarate (2OG) and Fe(II)-dependent oxygenase superfamily protein%3B BEST Arabidopsis thaliana protein match is: RING/U-box superfamily protein (TAIR:AT3G19895.1)%3B Has 67 Blast hits to 67 proteins in 13 species: Archae - 0%3B Bacteria - 0%3B Metazoa - 0%3B Fungi - 0%3B Plants - 67%3B Viruses - 0%3B Other Eukaryotes - 0 (source: NCBI BLink).	****	gene:2089244.UniProt:A4IJ32	NA	'35.2'	'not assigned.not annotated'	' no hits & (original description: none)'
Vitvi00g01039	3.51038	-1.4082	1.54661	-0.910503	0.362557	0.493179	3.51038	-0.856964	1.35922	-0.630483	0.528378	0.627485	3.51038	-1.86709	1.29286	-1.44415	0.148696	0.23306	3.51038	-2.88914	1.41444	-2.0426	0.0410918	0.0785554		AT3G49740.1	4e-41	165.6	1-to-1	NA	AT3G49740.1	Tetratricopeptide repeat (TPR)-like superfamily protein	NA	NA	NA	NA	Tetratricopeptide repeat (TPR)-like superfamily protein%3B FUNCTIONS IN: binding%3B INVOLVED IN: biological_process unknown%3B EXPRESSED IN: 18 plant structures%3B EXPRESSED DURING: 11 growth stages%3B CONTAINS InterPro DOMAIN/s: Pentatricopeptide repeat (InterPro:IPR002885)%2C Tetratricopeptide-like helical (InterPro:IPR011990)%3B BEST Arabidopsis thaliana protein match is: Pentatricopeptide rep…	***	gene:2097409.UniProt:Q9M2Y4	NA	'35.1'	'not assigned.annotated'	'Pentatricopeptide repeat-containing protein At3g49740 OS=Arabidopsis thaliana (sp|q9m2y4|pp276_arath : 161.0)'
Vitvi00g01043	0	NA	NA	NA	NA	NA	0	NA	NA	NA	NA	NA	0	NA	NA	NA	NA	NA	0	NA	NA	NA	NA	NA		NA	NA	NA	NA	NA	NA	NA	NA	NA	NA	NA	NA	NA	NA	NA	'35.2'	'not assigned.not annotated'	' no hits & (original description: none)'
Vitvi00g01046	0	NA	NA	NA	NA	NA	0	NA	NA	NA	NA	NA	0	NA	NA	NA	NA	NA	0	NA	NA	NA	NA	NA		NA	NA	NA	NA	NA	NA	NA	NA	NA	NA	NA	NA	NA	NA	NA	'35.2'	'not assigned.not annotated'	' no hits & (original description: none)'
Vitvi00g01047	623.094	-0.0298511	0.274297	-0.108827	0.913339	0.94624	623.094	-0.635016	0.24702	-2.57071	0.0101491	0.0241562	623.094	-0.284636	0.244624	-1.16357	0.2446	0.348892	623.094	-0.265418	0.248296	-1.06896	0.285088	0.3878	VIT_00s1211g00010	AT5G47690.1	7.9e-49	194.9	1-to-many	AT5G47690.2.AT5G47690.3.AT5G47690.4	AT5G47690.1	binding protein	NA	NA	PDS5	NA	binding%3B FUNCTIONS IN: binding%3B INVOLVED IN: biological_process unknown%3B LOCATED IN: mitochondrion%2C nucleus%2C chloroplast%3B EXPRESSED IN: cotyledon%2C guard cell%2C cultured cell%3B CONTAINS InterPro DOMAIN/s: Armadillo-type fold (InterPro:IPR016024)%3B BEST Arabidopsis thaliana protein match is: ARM repeat superfamily protein (TAIR:AT1G77600.2)%3B Has 16808 Blast hits to 11211 proteins…	****	PMID:14671022.PMID:15028209.PMID:18433157.PMID:21166475.gene:3441454.UniProt:B6EUB3	NA	'35.2'	'not assigned.not annotated'	' no hits & (original description: none)'
Vitvi00g01048	162.475	0.498736	0.197551	2.52459	0.0115833	0.032478	162.475	-0.035397	0.1843	-0.192062	0.847693	0.891443	162.475	0.59038	0.175835	3.35757	0.000786305	0.00243333	162.475	0.636738	0.189531	3.35955	0.000780709	0.00243935	VIT_00s1211g00020	AT5G47680.1	0.00074	42.7	1-to-1	NA	AT5G47680.1	tRNA (guanine(9)-N1)-methyltransferase-like protein	Encodes a protein involved in modification of nucleosides in tRNA. Mutants have 50%25 less 1-methylguanosine than wt counterparts.	"TRM10"	AtTRM	tRNA modification 10	FUNCTIONS IN: molecular_function unknown%3B INVOLVED IN: biological_process unknown%3B LOCATED IN: cellular_component unknown%3B EXPRESSED IN: 23 plant structures%3B EXPRESSED DURING: 13 growth stages%3B CONTAINS InterPro DOMAIN/s: tRNA (guanine-N1-)-methyltransferase (InterPro:IPR016009)%2C tRNA (guanine-N(1)-)-methyltransferase%2C metazoa (InterPro:IPR016653)%2C tRNA (guanine-N1-)-methyltransfe…	****	gene:2169042.UniProt:Q9FGI9	NA	'35.2'	'not assigned.not annotated'	' no hits & (original description: none)'
Vitvi00g01060	51.7349	-0.176903	0.339809	-0.520596	0.602648	0.714462	51.7349	0.676637	0.303336	2.23065	0.0257044	0.0535898	51.7349	-0.0131301	0.290568	-0.0451876	0.963958	0.977651	51.7349	-0.136258	0.3051	-0.4466	0.655164	0.740504	VIT_00s1247g00010	AT5G66870.1	2.5e-53	208.4	1-to-1	NA	AT5G66870.1	ASYMMETRIC LEAVES 2-like 1	Encodes LOB domain protein whose overexpression results in KNOX gene repression. Overexpression also results in plants with hyponastic leaves%2C downward pointing flowers and reduced apical dominance. May be involved in the transcriptional regulation of the homeobox gene BP (brevipedicellus) during lateral organ differentiation. Acts together with AS2 in proximal-distal symmetry determination.	"ASL1"	LBD36.LATERAL ORGAN BOUNDARIES DOMAIN GENE 36	ASYMMETRIC LEAVES 2-like 1	ASYMMETRIC LEAVES 2-like 1 (ASL1)%3B CONTAINS InterPro DOMAIN/s: Lateral organ boundaries%2C LOB (InterPro:IPR004883)%2C Asymmetric leaves%2C AS2/LOB (InterPro:IPR017414)%3B BEST Arabidopsis thaliana protein match is: LOB domain-containing protein 10 (TAIR:AT2G23660.2)%3B Has 1807 Blast hits to 1807 proteins in 277 species: Archae - 0%3B Bacteria - 0%3B Metazoa - 736%3B Fungi - 347%3B Plants - 38…	****	PMID:15821980.gene:2174988.UniProt:Q9FKZ3	NA	'15.7.24'	'RNA biosynthesis.transcriptional activation.AS2/LOB transcription factor'	'RNA biosynthesis.transcriptional activation.AS2/LOB transcription factor (original description: none)'
Vitvi00g01061	764.111	0.0212215	0.151307	0.140255	0.888459	0.930278	764.111	-0.235874	0.137026	-1.72138	0.0851811	0.146678	764.111	0.726136	0.135647	5.35314	8.64393e-08	5.8812e-07	764.111	0.522546	0.136451	3.82956	0.000128375	0.000485901	VIT_00s1247g00020	AT5G66860.1	1.1e-26	120.6	1-to-1	NA	AT5G66860.1	Ribosomal protein L25/Gln-tRNA synthetase%2C anti-codon-binding domain-containing protein	NA	NA	NA	NA	Ribosomal protein L25/Gln-tRNA synthetase%2C anti-codon-binding domain%3B INVOLVED IN: translation%3B LOCATED IN: mitochondrion%3B CONTAINS InterPro DOMAIN/s: Ribosomal protein L25%2C beta domain (InterPro:IPR020057)%2C Ribosomal protein L25/Gln-tRNA synthetase%2C anti-codon-binding domain (InterPro:IPR011035)%3B BEST Arabidopsis thaliana protein match is: Ribosomal protein L25/Gln-tRNA synthetas…	****	PMID:14671022.gene:2174978.UniProt:Q9FKZ4	NA	'35.2'	'not assigned.not annotated'	' no hits & (original description: none)'
Vitvi00g01062	124.174	2.49395	0.598514	4.1669	3.08766e-05	0.00019626	124.174	1.70556	0.549567	3.10346	0.00191274	0.00565256	124.174	1.39961	0.532598	2.62789	0.00859166	0.0203522	124.174	1.85129	0.560396	3.30354	0.000954725	0.00291702	VIT_00s1251g00010	AT1G22360.1	2.1e-79	297	1-to-many	AT1G22360.2	AT1G22360.1	UDP-glucosyl transferase 85A2	NA	"UGT85A2"	AtUGT85A2.UDP-glucosyl transferase 85A2	UDP-glucosyl transferase 85A2	UDP-glucosyl transferase 85A2 (UGT85A2)%3B FUNCTIONS IN: UDP-glycosyltransferase activity%2C transferase activity%2C transferring glycosyl groups%2C glucuronosyltransferase activity%3B INVOLVED IN: metabolic process%3B LOCATED IN: cellular_component unknown%3B EXPRESSED IN: 21 plant structures%3B EXPRESSED DURING: 11 growth stages%3B CONTAINS InterPro DOMAIN/s: UDP-glucuronosyl/UDP-glucosyltransf…	****	PMID:12912986.gene:2196500.UniProt:Q9ZWJ3	NA	'50.2.4'	'Enzyme classification.EC_2 transferases.EC_2.4 glycosyltransferase'	'Linamarin synthase 2 OS=Manihot esculenta (sp|g3fin9|ugtk5_manes : 251.0) & Enzyme classification.EC_2 transferases.EC_2.4 glycosyltransferase(50.2.4 : 119.1) (original description: none)'
Vitvi00g01079	3.88054	1.29391	0.93622	1.38206	0.166953	0.274484	3.88054	-0.780277	0.98265	-0.794053	0.427164	0.533863	3.88054	0.85664	0.805585	1.06338	0.287611	0.396194	3.88054	1.4985	1.3621	1.10014	0.271273	0.373084		NA	NA	NA	NA	NA	NA	NA	NA	NA	NA	NA	NA	NA	NA	NA	'35.2'	'not assigned.not annotated'	' no hits & (original description: none)'
Vitvi00g01091	0	NA	NA	NA	NA	NA	0	NA	NA	NA	NA	NA	0	NA	NA	NA	NA	NA	0	NA	NA	NA	NA	NA		AT3G12070.1	4.8e-11	63.9	1-to-many	AT3G12070.2.AT3G12070.3.AT3G12070.4	AT3G12070.1	RAB geranylgeranyl transferase beta subunit 2	NA	"RGTB2"	AtRGTB2.RAB geranylgeranyl transferase beta subunit 2	RAB geranylgeranyl transferase beta subunit 2	RAB geranylgeranyl transferase beta subunit 2 (RGTB2)%3B FUNCTIONS IN: catalytic activity%3B EXPRESSED IN: 13 plant structures%3B EXPRESSED DURING: 6 growth stages%3B CONTAINS InterPro DOMAIN/s: Terpenoid cylases/protein prenyltransferase alpha-alpha toroid (InterPro:IPR008930)%2C Prenyltransferase/squalene oxidase (InterPro:IPR001330)%3B BEST Arabidopsis thaliana protein match is: RAB geranylger…	****	PMID:8954794.gene:2088613.UniProt:Q9LHL5	NA	'35.2'	'not assigned.not annotated'	' no hits & (original description: none)'
Vitvi00g01092	0.33187	1.16536	6.51283	0.178933	0.85799	NA	0.33187	0	5.88922	0	1	NA	0.33187	-0.0802591	5.79497	-0.0138498	0.98895	NA	0.33187	0	5.88968	0	1	NA	VIT_00s1331g00020	NA	NA	NA	NA	NA	NA	NA	NA	NA	NA	NA	NA	NA	NA	NA	'35.2'	'not assigned.not annotated'	' no hits & (original description: none)'
Vitvi00g01096	16.0602	0.14319	0.593453	0.241284	0.809335	0.874506	16.0602	-0.566211	0.549551	-1.03032	0.302861	0.409105	16.0602	-0.270114	0.496312	-0.544243	0.586275	0.686857	16.0602	0.414987	0.548316	0.756839	0.449147	0.555643	VIT_00s1348g00020	AT5G47380.1	9.7e-16	85.1	1-to-many	AT5G47380.4.AT5G47380.5	AT5G47380.1	electron transporter%2C putative (Protein of unknown function%2C DUF547)	NA	NA	NA	NA	Protein of unknown function%2C DUF547%3B FUNCTIONS IN: molecular_function unknown%3B INVOLVED IN: biological_process unknown%3B LOCATED IN: cellular_component unknown%3B EXPRESSED IN: 13 plant structures%3B EXPRESSED DURING: 8 growth stages%3B CONTAINS InterPro DOMAIN/s: Protein of unknown function DUF547 (InterPro:IPR006869)%3B BEST Arabidopsis thaliana protein match is: Protein of unknown funct…	**	gene:2171498.UniProt:F4JX46	NA	'35.2'	'not assigned.not annotated'	' no hits & (original description: none)'
Vitvi00g01098	20074.4	0.428057	0.189539	2.25841	0.02392	0.0586464	20074.4	0.152385	0.169614	0.898424	0.36896	0.476327	20074.4	-1.50412	0.16951	-8.87334	7.09871e-19	1.90277e-17	20074.4	-1.23399	0.169535	-7.2787	3.37046e-13	5.58149e-12	VIT_00s1353g00010	AT5G65700.1	2.2e-150	531.9	1-to-many	AT5G65700.2	AT5G65700.1	Leucine-rich receptor-like protein kinase family protein	Encodes a CLAVATA1-related receptor kinase-like protein required for both shoot and flower meristem function. Very similar to BAM2%2Cwith more than 85%25 a.a. identity. It has a broad expression pattern and is involved in vascular strand development in the leaf%2C control of leaf shape%2C size and symmetry%2C male gametophyte development and ovule specification and function. Anthers of double mut…	"BAM1"	NA	BARELY ANY MERISTEM 1	BARELY ANY MERISTEM 1 (BAM1)%3B FUNCTIONS IN: protein serine/threonine kinase activity%2C kinase activity%2C ATP binding%3B INVOLVED IN: in 9 processes%3B LOCATED IN: plasma membrane%3B EXPRESSED IN: 32 plant structures%3B EXPRESSED DURING: 15 growth stages%3B CONTAINS InterPro DOMAIN/s: Protein kinase%2C catalytic domain (InterPro:IPR000719)%2C Leucine-rich repeat-containing N-terminal domain%2C…	****	PMID:14506206.PMID:16280546.PMID:17317660.PMID:21075962.gene:2169964.UniProt:O49545	NA	'18.8.1.11'	'Protein modification.phosphorylation.TKL kinase superfamily.LRR-XI kinase'	'Protein modification.phosphorylation.TKL kinase superfamily.LRR-XI kinase (original description: none)'
Vitvi00g01101	88.4061	0.0049455	0.327602	0.0150961	0.987956	0.994101	88.4061	-0.0644762	0.299493	-0.215285	0.829545	0.877696	88.4061	0.579042	0.299362	1.93425	0.0530823	0.0986191	88.4061	1.06132	0.30328	3.49948	0.000466166	0.00154343	VIT_00s1361g00010	NA	NA	NA	NA	NA	NA	NA	NA	NA	NA	NA	NA	NA	NA	NA	'35.2'	'not assigned.not annotated'	' no hits & (original description: none)'
Vitvi00g01102	1101.52	-0.328356	0.164117	-2.00075	0.0454193	0.0987729	1101.52	-0.617581	0.147603	-4.18406	2.86343e-05	0.000132746	1101.52	0.247215	0.147299	1.67832	0.0932852	0.158617	1101.52	0.576769	0.148917	3.8731	0.000107461	0.000414316	VIT_00s1365g00010	AT5G48460.1	5.3e-54	212.6	1-to-1	NA	AT5G48460.1	Actin binding Calponin homology (CH) domain-containing protein	NA	NA	NA	NA	Actin binding Calponin homology (CH) domain-containing protein%3B FUNCTIONS IN: actin binding%3B INVOLVED IN: biological_process unknown%3B EXPRESSED IN: 22 plant structures%3B EXPRESSED DURING: 13 growth stages%3B CONTAINS InterPro DOMAIN/s: Actinin-type%2C actin-binding%2C conserved site (InterPro:IPR001589)%2C Calponin-homology (InterPro:IPR016146)%2C Calponin-like actin-binding (InterPro:IPR0…	****	gene:2166095.UniProt:O50064	NA	'20.2.2.4'	'Cytoskeleton.microfilament network.actin polymerisation.fimbrin actin-crosslinking factor'	'Cytoskeleton.microfilament network.actin polymerisation.fimbrin actin-crosslinking factor (original description: none)'
Vitvi00g01105	656.592	0.367222	0.181634	2.02177	0.0432001	0.0949527	656.592	0.231016	0.163686	1.41133	0.158147	0.243298	656.592	-0.0191227	0.162709	-0.117528	0.906442	0.935694	656.592	-0.2455	0.164564	-1.49182	0.135745	0.212873	VIT_00s1373g00010	AT3G50590.1	1.9e-58	224.2	1-to-many	AT3G50590.2	AT3G50590.1	Transducin/WD40 repeat-like superfamily protein	NA	NA	NA	NA	Transducin/WD40 repeat-like superfamily protein%3B FUNCTIONS IN: nucleotide binding%3B INVOLVED IN: biological_process unknown%3B LOCATED IN: plasma membrane%3B EXPRESSED IN: 23 plant structures%3B EXPRESSED DURING: 13 growth stages%3B CONTAINS InterPro DOMAIN/s: WD40 repeat 2 (InterPro:IPR019782)%2C WD40 repeat-like-containing domain (InterPro:IPR011046)%2C WD40-repeat-containing domain (InterPr…	**	PMID:17317660.PMID:21166475.gene:2098764.UniProt:F4J0P2	NA	'35.2'	'not assigned.not annotated'	' no hits & (original description: none)'
Vitvi00g01106	51.4779	-0.500696	0.454006	-1.10284	0.270096	0.396201	51.4779	-0.410658	0.41301	-0.994305	0.320074	0.427433	51.4779	0.111777	0.400306	0.27923	0.780068	0.844075	51.4779	0.854948	0.430342	1.98667	0.0469586	0.0880401	VIT_00s1373g00020	AT4G37080.1	1.4e-36	151	1-to-many	AT4G37080.2.AT4G37080.3	AT4G37080.1	ternary complex factor MIP1 leucine-zipper protein (Protein of unknown function%2C DUF547)	NA	NA	NA	NA	Protein of unknown function%2C DUF547%3B CONTAINS InterPro DOMAIN/s: Protein of unknown function DUF547 (InterPro:IPR006869)%3B BEST Arabidopsis thaliana protein match is: Protein of unknown function%2C DUF547 (TAIR:AT5G42690.2)%3B Has 1854 Blast hits to 1696 proteins in 329 species: Archae - 6%3B Bacteria - 397%3B Metazoa - 313%3B Fungi - 62%3B Plants - 588%3B Viruses - 2%3B Other Eukaryotes - 4…	****	gene:2115163.UniProt:Q8RY64	NA	'35.2'	'not assigned.not annotated'	' no hits & (original description: none)'
Vitvi00g01109	4.89858	-1.65824	1.05006	-1.57918	0.114296	0.205162	4.89858	-1.89298	0.949637	-1.99337	0.0462213	0.0878147	4.89858	-1.25588	1.02431	-1.22607	0.220171	0.321175	4.89858	0.641437	0.923832	0.694322	0.48748	0.592069	VIT_00s1395g00010	AT5G10250.2	4.9e-133	474.2	1-to-1	NA	AT5G10250.2	Phototropic-responsive NPH3 family protein	NA	"DOT3"	NA	DEFECTIVELY ORGANIZED TRIBUTARIES 3	NA	NA	NA	NA	'35.1'	'not assigned.annotated'	'BTB/POZ domain-containing protein DOT3 OS=Arabidopsis thaliana (sp|q9lfu0|dot3_arath : 370.0)'
Vitvi00g01110	702.894	-0.0418425	0.147212	-0.284233	0.776232	0.851001	702.894	0.236437	0.132771	1.78079	0.0749474	0.131999	702.894	-0.0607246	0.130942	-0.463754	0.642824	0.733681	702.894	-0.179245	0.133716	-1.34049	0.180086	0.26845	VIT_00s1397g00010	AT1G11160.1	1e-20	101.7	1-to-many	AT1G11160.2.AT1G11160.3.AT1G11160.4.AT1G61210.1.AT1G61210.2.AT1G61210.3	AT1G11160.1	Transducin/WD40 repeat-like superfamily protein	NA	NA	NA	NA	Transducin/WD40 repeat-like superfamily protein%3B CONTAINS InterPro DOMAIN/s: WD40 repeat 2 (InterPro:IPR019782)%2C WD40 repeat%2C conserved site (InterPro:IPR019775)%2C WD40 repeat (InterPro:IPR001680)%2C G-protein beta WD-40 repeat%2C region (InterPro:IPR020472)%2C WD40 repeat-like-containing domain (InterPro:IPR011046)%2C WD40-repeat-containing domain (InterPro:IPR017986)%2C WD40/YVTN repeat-…	**	PMID:18223036.PMID:18552200.gene:2202128.UniProt:F4I7E1	NA	'35.1'	'not assigned.annotated'	'Putative ribonuclease H protein At1g65750 OS=Arabidopsis thaliana (sp|p0c2f6|rnhx1_arath : 117.0)'
Vitvi00g01115	0.179209	0	6.58482	0	1	NA	0.179209	-1.52373	5.87051	-0.259556	0.795206	NA	0.179209	0	5.88968	0	1	NA	0.179209	-1.97231	5.86169	-0.336475	0.736513	NA		NA	NA	NA	NA	NA	NA	NA	NA	NA	NA	NA	NA	NA	NA	NA	'35.2'	'not assigned.not annotated'	' no hits & (original description: none)'
Vitvi00g01116	0	NA	NA	NA	NA	NA	0	NA	NA	NA	NA	NA	0	NA	NA	NA	NA	NA	0	NA	NA	NA	NA	NA		NA	NA	NA	NA	NA	NA	NA	NA	NA	NA	NA	NA	NA	NA	NA	'35.2'	'not assigned.not annotated'	' no hits & (original description: none)'
Vitvi00g01118	9.08758	1.01315	1.83017	0.553581	0.579866	0.69511	9.08758	-1.44236	1.7556	-0.821579	0.411317	0.518706	9.08758	0.942526	1.64415	0.573261	0.566468	0.669707	9.08758	3.52063	1.93123	1.82299	0.0683042	0.120386	VIT_00s1427g00010	AT2G27210.1	8.2e-52	204.1	1-to-1	NA	AT2G27210.1	BRI1 suppressor 1 (BSU1)-like 3	NA	"BSL3"	NA	BRI1 suppressor 1 (BSU1)-like 3	BRI1 suppressor 1 (BSU1)-like 3 (BSL3)%3B FUNCTIONS IN: hydrolase activity%2C manganese ion binding%2C protein serine/threonine phosphatase activity%2C phosphoprotein phosphatase activity%2C iron ion binding%3B INVOLVED IN: biological_process unknown%3B LOCATED IN: cytosol%2C plasma membrane%3B EXPRESSED IN: guard cell%2C cultured cell%3B CONTAINS InterPro DOMAIN/s: Serine/threonine protein phosp…	****	PMID:17317660.PMID:18433157.PMID:21166475.gene:2059609.UniProt:Q9SHS7	NA	'35.1'	'not assigned.annotated'	'Serine/threonine-protein phosphatase BSL3 OS=Arabidopsis thaliana (sp|q9shs7|bsl3_arath : 209.0)'
Vitvi00g01122	0	NA	NA	NA	NA	NA	0	NA	NA	NA	NA	NA	0	NA	NA	NA	NA	NA	0	NA	NA	NA	NA	NA	VIT_00s1448g00010	NA	NA	NA	NA	NA	NA	NA	NA	NA	NA	NA	NA	NA	NA	NA	'35.2'	'not assigned.not annotated'	' no hits & (original description: none)'
Vitvi00g01123	32.824	0.500091	0.412649	1.2119	0.225549	0.346356	32.824	1.16685	0.376813	3.09662	0.00195738	0.00576826	32.824	0.498571	0.343408	1.45183	0.146548	0.230378	32.824	0.088745	0.368862	0.240591	0.809872	0.864479	VIT_00s1450g00010	AT4G18370.1	9.1e-15	81.3	1-to-many	AT4G18370.2	AT4G18370.1	DEGP protease 5	Encodes DEG5. Forms a hexamer with DEG8 in the thylakoid lumen. Involved in the cleavage of photodamaged D2 protein of photosystem II (PSII).	"DEG5"	DEGP5.DEGP PROTEASE 5.HHOA.PROTEASE HHOA PRECUSOR	degradation of periplasmic proteins 5	DEGP protease 5 (DEG5)%3B FUNCTIONS IN: serine-type peptidase activity%2C catalytic activity%2C serine-type endopeptidase activity%3B INVOLVED IN: photosystem II repair%2C proteolysis%3B LOCATED IN: thylakoid%2C thylakoid lumen%2C chloroplast thylakoid lumen%2C chloroplast%3B EXPRESSED IN: 22 plant structures%3B EXPRESSED DURING: 13 growth stages%3B CONTAINS InterPro DOMAIN/s: Serine/cysteine pep…	****	PMID:11719511.PMID:11826309.PMID:15028209.PMID:16648217.PMID:18431481.gene:2124508.UniProt:Q9SEL7	NA	'35.2'	'not assigned.not annotated'	' no hits & (original description: none)'
Vitvi00g01126	0	NA	NA	NA	NA	NA	0	NA	NA	NA	NA	NA	0	NA	NA	NA	NA	NA	0	NA	NA	NA	NA	NA		AT1G17860.1	1.6e-19	95.9	1-to-1	NA	AT1G17860.1	Kunitz family trypsin and protease inhibitor protein	NA	NA	NA	NA	Kunitz family trypsin and protease inhibitor protein%3B FUNCTIONS IN: endopeptidase inhibitor activity%3B INVOLVED IN: biological_process unknown%3B LOCATED IN: apoplast%2C cell wall%3B EXPRESSED IN: 17 plant structures%3B EXPRESSED DURING: 13 growth stages%3B CONTAINS InterPro DOMAIN/s: Proteinase inhibitor I3%2C Kunitz legume (InterPro:IPR002160)%2C Kunitz inhibitor ST1-like (InterPro:IPR011065…	*****	PMID:15593128.PMID:18538804.gene:2030922.UniProt:Q9LMU2	NA	'35.1'	'not assigned.annotated'	'Kunitz trypsin inhibitor 2 OS=Arabidopsis thaliana (sp|q9lmu2|kti2_arath : 90.9)'
Vitvi00g01134	14.8429	1.23258	0.464232	2.6551	0.00792859	0.0237289	14.8429	0.664058	0.47797	1.38933	0.164733	0.251279	14.8429	0.65592	0.407519	1.60955	0.107497	0.17844	14.8429	1.20389	0.49944	2.41047	0.0159319	0.0347313		NA	NA	NA	NA	NA	NA	NA	NA	NA	NA	NA	NA	NA	NA	NA	'35.2'	'not assigned.not annotated'	' no hits & (original description: none)'
Vitvi00g01144	213.635	-0.0483601	0.224746	-0.215176	0.82963	0.88802	213.635	-0.288432	0.202224	-1.4263	0.153782	0.237923	213.635	0.0309866	0.197596	0.156818	0.875389	0.91318	213.635	0.0516446	0.197825	0.261062	0.794045	0.85197	VIT_00s1546g00010	AT1G78690.1	1.4e-21	102.4	1-to-many	AT1G78690.2.AT1G78690.5	AT1G78690.1	Phospholipid/glycerol acyltransferase family protein	Encodes a lysoglycerophospholipid O-acyltransferase that acylates 1-acyl lyso PE and 1-acyl lyso PG but not PE or PG.	"At1g78690p"	NA	NA	Phospholipid/glycerol acyltransferase family protein%3B FUNCTIONS IN: acyltransferase activity%3B INVOLVED IN: metabolic process%3B EXPRESSED IN: 21 plant structures%3B EXPRESSED DURING: 12 growth stages%3B CONTAINS InterPro DOMAIN/s: Phospholipid/glycerol acyltransferase (InterPro:IPR002123)%2C Tafazzin (InterPro:IPR000872)%3B BEST Arabidopsis thaliana protein match is: Phospholipid/glycerol acy…	****	gene:2037537.UniProt:Q9ZV87	NA	'35.1'	'not assigned.annotated'	'N-acylphosphatidylethanolamine synthase OS=Arabidopsis thaliana (sp|q9zv87|napes_arath : 103.0)'
Vitvi00g01145	63.3029	1.35751	0.530986	2.55659	0.0105703	0.0301626	63.3029	1.04535	0.486743	2.14764	0.0317421	0.063891	63.3029	0.698505	0.457933	1.52534	0.127173	0.204933	63.3029	0.978828	0.469012	2.087	0.036888	0.0716316	VIT_00s1547g00010	AT1G18730.4	1.7e-14	79	1-to-1	NA	AT1G18730.4	NDH dependent flow 6	likely a subunit of the chloroplast NAD(P)H dehydrogenase complex%2C involved in PSI cyclic electron transport. Located on the thylakoid membrane. Mutant has impaired NAD(P)H dehydrogenase activity.	"PnsB4"	NDF6.NDH dependent flow 6	Photosynthetic NDH subcomplex B 4	NDH dependent flow 6 (NDF6)%3B Has 30201 Blast hits to 17322 proteins in 780 species: Archae - 12%3B Bacteria - 1396%3B Metazoa - 17338%3B Fungi - 3422%3B Plants - 5037%3B Viruses - 0%3B Other Eukaryotes - 2996 (source: NCBI BLink).	****	gene:4515100581.UniProt:B3H6Z4	NA	'1.1.8.1.3.4'	'Photosynthesis.photophosphorylation.chlororespiration.NADH dehydrogenase-like (NDH) complex.subcomplex B.PnsB4/NDF6 component'	'Photosynthesis.photophosphorylation.chlororespiration.NADH dehydrogenase-like (NDH) complex.subcomplex B.PnsB4/NDF6 component (original description: none)'
Vitvi00g01147	0	NA	NA	NA	NA	NA	0	NA	NA	NA	NA	NA	0	NA	NA	NA	NA	NA	0	NA	NA	NA	NA	NA	GSVIVT00009961001	NA	NA	NA	NA	NA	NA	NA	NA	NA	NA	NA	NA	NA	NA	NA	'35.2'	'not assigned.not annotated'	' no hits & (original description: none)'
Vitvi00g01148	30.825	-0.535235	0.45696	-1.1713	0.24148	0.364728	30.825	0.738021	0.371277	1.98779	0.046835	0.0887585	30.825	-0.613243	0.436644	-1.40445	0.160185	0.24768	30.825	-0.204382	0.361623	-0.565178	0.571952	0.669266	VIT_00s1557g00010	AT4G04960.1	1.1e-85	314.3	1-to-1	NA	AT4G04960.1	Concanavalin A-like lectin protein kinase family protein	NA	NA	LecRK-VII.1.L-type lectin receptor kinase VII.1	NA	Concanavalin A-like lectin protein kinase family protein%3B FUNCTIONS IN: kinase activity%3B INVOLVED IN: protein amino acid phosphorylation%3B LOCATED IN: endomembrane system%3B EXPRESSED IN: 21 plant structures%3B EXPRESSED DURING: 12 growth stages%3B CONTAINS InterPro DOMAIN/s: Legume lectin%2C beta chain (InterPro:IPR001220)%2C Protein kinase%2C ATP binding site (InterPro:IPR017441)%2C Serine…	*****	gene:2138380.UniProt:Q9S9U1	NA	'50.2.7'	'Enzyme classification.EC_2 transferases.EC_2.7 transferase transferring phosphorus-containing group'	'L-type lectin-domain containing receptor kinase VII.1 OS=Arabidopsis thaliana (sp|q9s9u1|lrk71_arath : 286.0) & Enzyme classification.EC_2 transferases.EC_2.7 transferase transferring phosphorus-containing group(50.2.7 : 86.7) (original description: none)'
Vitvi00g01149	15.7798	-0.843334	0.653323	-1.29084	0.19676	0.311978	15.7798	0.817372	0.467973	1.74662	0.0807026	0.140257	15.7798	-0.875052	0.614924	-1.42303	0.154729	0.240828	15.7798	-0.580923	0.493297	-1.17763	0.238943	0.337218	VIT_00s1557g00020	AT4G04960.1	8.8e-129	458.4	1-to-many	AT4G04960.2	AT4G04960.1	Concanavalin A-like lectin protein kinase family protein	NA	NA	LecRK-VII.1.L-type lectin receptor kinase VII.1	NA	Concanavalin A-like lectin protein kinase family protein%3B FUNCTIONS IN: kinase activity%3B INVOLVED IN: protein amino acid phosphorylation%3B LOCATED IN: endomembrane system%3B EXPRESSED IN: 21 plant structures%3B EXPRESSED DURING: 12 growth stages%3B CONTAINS InterPro DOMAIN/s: Legume lectin%2C beta chain (InterPro:IPR001220)%2C Protein kinase%2C ATP binding site (InterPro:IPR017441)%2C Serine…	*****	gene:2138380.UniProt:Q9S9U1	NA	'18.8.1.19'	'Protein modification.phosphorylation.TKL kinase superfamily.L-lectin kinase'	'Protein modification.phosphorylation.TKL kinase superfamily.L-lectin kinase (original description: none)'
Vitvi00g01150	0.0692106	0	6.58482	0	1	NA	0.0692106	0	5.88922	0	1	NA	0.0692106	1.97359	5.87802	0.335758	0.737054	NA	0.0692106	0	5.88968	0	1	NA		AT4G20940.1	4.1e-11	67.4	1-to-1	NA	AT4G20940.1	Leucine-rich receptor-like protein kinase family protein	Encodes a plasma-membrane localized LRR receptor-like protein involved in both ABA and H202 mediated signaling involved in stomatal movement. TAIR10 annotation for this gene has a low confidence score (2-star). See Comments field for structural annotation by the community.	"GHR1"	NA	GUARD CELL HYDROGEN PEROXIDE-RESISTANT 1	Leucine-rich receptor-like protein kinase family protein%3B FUNCTIONS IN: protein serine/threonine kinase activity%2C protein kinase activity%2C ATP binding%3B INVOLVED IN: signal transduction%2C N-terminal protein myristoylation%3B LOCATED IN: plasma membrane%3B CONTAINS InterPro DOMAIN/s: Serine/threonine-protein kinase domain (InterPro:IPR002290)%2C Leucine-rich repeat-containing N-terminal do…	**	PMID:11751054.PMID:12912986.PMID:17317660.gene:2133048.UniProt:C0LGQ9	NA	'35.2'	'not assigned.not annotated'	' no hits & (original description: none)'
Vitvi00g01151	1057.78	0.98468	0.289992	3.39554	0.000684925	0.00299437	1057.78	-0.930396	0.261749	-3.55454	0.000378648	0.00134558	1057.78	0.896051	0.260039	3.44583	0.000569302	0.00182022	1057.78	-2.91334	0.26161	-11.1362	8.36296e-29	6.7407e-27	VIT_00s1566g00010	AT2G22590.1	8.9e-87	318.9	1-to-1	NA	AT2G22590.1	UDP-Glycosyltransferase superfamily protein	NA	NA	NA	NA	UDP-Glycosyltransferase superfamily protein%3B FUNCTIONS IN: transferase activity%2C transferring glycosyl groups%3B INVOLVED IN: metabolic process%3B LOCATED IN: cellular_component unknown%3B CONTAINS InterPro DOMAIN/s: UDP-glucuronosyl/UDP-glucosyltransferase (InterPro:IPR002213)%3B BEST Arabidopsis thaliana protein match is: UDP-Glycosyltransferase superfamily protein (TAIR:AT5G65550.1)%3B Has…	*****	gene:2066009.UniProt:Q940V3	NA	'50.2.4'	'Enzyme classification.EC_2 transferases.EC_2.4 glycosyltransferase'	'Putative UDP-rhamnose:rhamnosyltransferase 1 OS=Fragaria ananassa (sp|q66pf2|urt1_fraan : 325.0) & Enzyme classification.EC_2 transferases.EC_2.4 glycosyltransferase(50.2.4 : 41.9) (original description: none)'
Vitvi00g01163	3473.5	0.184858	0.130633	1.41509	0.157043	0.261885	3473.5	0.549546	0.11687	4.7022	2.57373e-06	1.49404e-05	3473.5	0.033658	0.117026	0.287611	0.773645	0.838975	3473.5	0.107746	0.117104	0.920088	0.357527	0.464883	VIT_00s1603g00010	AT1G02130.1	1.2e-17	89.7	1-to-many	AT4G17530.1.AT5G47200.1	AT1G02130.1	RAS 5	Belongs to the Rab1 GTPase subfamily. This small GTP-binding protein is required in ER to Golgi transportation.	"RA-5"	ARA-5.RAS 5.ARA5.ARABIDOPSIS RAS 5.ATRAB1B.ARABIDOPSIS THALIANA RESPONSIVE TO ABSCISIC ACID 1B.ATRABD2A.ARABIDOPSIS THALIANA RAB D2A.RABD2A.RAB D2A	RAS 5	RAS 5 (RA-5)%3B FUNCTIONS IN: GTP binding%3B INVOLVED IN: response to cadmium ion%2C ER to Golgi vesicle-mediated transport%3B LOCATED IN: plasma membrane%2C vacuole%3B EXPRESSED IN: 24 plant structures%3B EXPRESSED DURING: 13 growth stages%3B CONTAINS InterPro DOMAIN/s: Ras GTPase (InterPro:IPR001806)%2C Small GTP-binding protein (InterPro:IPR005225)%2C Small GTPase (InterPro:IPR020851)%2C Ras (…	****	PMID:15060130.PMID:15539469.PMID:16502469.gene:2205602.UniProt:P28188	NA	'35.1'	'not assigned.annotated'	'GTP-binding protein YPTC1 OS=Chlamydomonas reinhardtii (sp|q39571|yptc1_chlre : 89.7)'
Vitvi00g01165	0	NA	NA	NA	NA	NA	0	NA	NA	NA	NA	NA	0	NA	NA	NA	NA	NA	0	NA	NA	NA	NA	NA		NA	NA	NA	NA	NA	NA	NA	NA	NA	NA	NA	NA	NA	NA	NA	'35.2'	'not assigned.not annotated'	' no hits & (original description: none)'
Vitvi00g01166	0	NA	NA	NA	NA	NA	0	NA	NA	NA	NA	NA	0	NA	NA	NA	NA	NA	0	NA	NA	NA	NA	NA		NA	NA	NA	NA	NA	NA	NA	NA	NA	NA	NA	NA	NA	NA	NA	'35.2'	'not assigned.not annotated'	' no hits & (original description: none)'
Vitvi00g01167	152.356	1.46763	0.231954	6.32724	2.49592e-10	4.13765e-09	152.356	1.07223	0.217742	4.92433	8.46501e-07	5.37028e-06	152.356	0.825461	0.208161	3.96549	7.32458e-05	0.000285597	152.356	0.481598	0.212367	2.26776	0.0233436	0.0482848		AT3G13300.1	4.4e-85	315.1	1-to-many	AT3G13300.2.AT3G13300.3	AT3G13300.1	Transducin/WD40 repeat-like superfamily protein	Encodes VCS (VARICOSE). Involved in mRNA decapping. VCS forms a mRNA decapping complex with DCP1 (At1g08370) and DCP2 (At5g13570). Unlike DCP2%2C VCS itself does not have mRNA decapping activity in vitro. DCP1%2C DCP2 and VCS colocalize in cytoplasmic loci%2C which are putative Arabidopsis mRNA processing bodies. Null mutants of DCP1%2C DCP2%2C and VCS accumulate capped mRNAs with a reduced degra…	"VCS"	NA	VARICOSE	VARICOSE (VCS)%3B FUNCTIONS IN: protein homodimerization activity%2C nucleotide binding%3B INVOLVED IN: mRNA catabolic process%2C deadenylation-independent decapping of nuclear-transcribed mRNA%2C leaf morphogenesis%3B LOCATED IN: cytosol%2C nucleus%2C cytoplasmic mRNA processing body%3B EXPRESSED IN: whole plant%2C guard cell%2C cultured cell%3B CONTAINS InterPro DOMAIN/s: WD40 repeat-like-conta…	****	PMID:17158604.PMID:18433157.gene:2088164.UniProt:Q9LTT8	NA	'35.1'	'not assigned.annotated'	'Enhancer of mRNA-decapping protein 4 OS=Arabidopsis thaliana (sp|q9ltt8|vcs_arath : 239.0)'
Vitvi00g01168	887.425	0.102257	0.171429	0.596497	0.550843	0.670253	887.425	0.00638038	0.155083	0.0411416	0.967183	0.978391	887.425	0.200318	0.153001	1.30926	0.190447	0.285257	887.425	0.345268	0.156211	2.21027	0.0270864	0.0549001	VIT_00s1623g00010	AT1G17130.1	4.4e-31	135.2	1-to-many	AT1G17130.2	AT1G17130.1	coiled-coil protein (DUF572)	NA	NA	NA	NA	Family of unknown function (DUF572) %3B CONTAINS InterPro DOMAIN/s: Protein of unknown function DUF572 (InterPro:IPR007590)%3B BEST Arabidopsis thaliana protein match is: Family of unknown function (DUF572) (TAIR:AT2G32050.1)%3B Has 1377 Blast hits to 1314 proteins in 254 species: Archae - 0%3B Bacteria - 51%3B Metazoa - 442%3B Fungi - 351%3B Plants - 150%3B Viruses - 5%3B Other Eukaryotes - 378 …	****	gene:2020366.UniProt:Q9SHH1	NA	'35.2'	'not assigned.not annotated'	' no hits & (original description: none)'
Vitvi00g01169	0	NA	NA	NA	NA	NA	0	NA	NA	NA	NA	NA	0	NA	NA	NA	NA	NA	0	NA	NA	NA	NA	NA		NA	NA	NA	NA	NA	NA	NA	NA	NA	NA	NA	NA	NA	NA	NA	'35.2'	'not assigned.not annotated'	' no hits & (original description: none)'
Vitvi00g01173	5.39794	-1.11956	1.8692	-0.598951	0.549206	0.668877	5.39794	-1.11535	1.71599	-0.649974	0.515709	0.616253	5.39794	0.18717	1.58979	0.117733	0.906279	0.93563	5.39794	-1.46781	1.70559	-0.860588	0.389465	0.497454		AT4G37640.1	2.7e-36	150.6	1-to-1	NA	AT4G37640.1	calcium ATPase 2	Encodes a calmodulin-regulated Ca(2+)-pump located in the endoplasmic reticulum. Belongs to plant 2B ATPase's with an N-terminal autoinhibitor.	"ACA2"	NA	calcium ATPase 2	calcium ATPase 2 (ACA2)%3B FUNCTIONS IN: calcium-transporting ATPase activity%2C calmodulin binding%2C calcium ion transmembrane transporter activity%3B INVOLVED IN: transport%3B LOCATED IN: endoplasmic reticulum%2C plasma membrane%2C endoplasmic reticulum membrane%3B EXPRESSED IN: 25 plant structures%3B EXPRESSED DURING: 15 growth stages%3B CONTAINS InterPro DOMAIN/s: ATPase%2C P-type%2C ATPase-…	*****	PMID:11782485.PMID:16618929.PMID:17317660.gene:2120095.UniProt:O81108	NA	'35.1'	'not assigned.annotated'	'Calcium-transporting ATPase 10. plasma membrane-type OS=Oryza sativa subsp. japonica (sp|q2qmx9|aca10_orysj : 154.0)'
Vitvi00g01174	10.7717	1.78295	0.831747	2.14363	0.0320629	0.0747257	10.7717	0.841591	0.816157	1.03116	0.302464	0.40875	10.7717	1.25532	0.754468	1.66385	0.0961424	0.162792	10.7717	0.765532	0.781167	0.979986	0.327093	0.433375	VIT_00s1658g00010	AT5G40820.1	5.2e-46	183.3	1-to-many	AT5G40820.2.AT5G40820.3.AT5G40820.4	AT5G40820.1	Ataxia telangiectasia-mutated and RAD3-like protein	Encodes a Arabidopsis ortholog of the ATR protein kinase that is involved in a wide range of responses to DNA damage and plays a central role in cell-cycle regulation. Dominant loss of function alleles identified as suppressors of ALS also exhibit increased tolerance to aluminum. This may be due to the inhibition of terminal differentiation of the root apex upon exposure to Al.	"ATR"	ATATR.ARABIDOPSIS THALIANA ATAXIA TELANGIECTASIA-MUTATED AND RAD3-RELATED.ATRAD3	Ataxia telangiectasia-mutated and RAD3-related	Ataxia telangiectasia-mutated and RAD3-related (ATR)%3B FUNCTIONS IN: protein serine/threonine kinase activity%2C inositol or phosphatidylinositol kinase activity%2C binding%2C phosphotransferase activity%2C alcohol group as acceptor%3B INVOLVED IN: in 9 processes%3B EXPRESSED IN: 10 plant structures%3B EXPRESSED DURING: 6 growth stages%3B CONTAINS InterPro DOMAIN/s: Phosphatidylinositol 3-/4-kin…	*****	PMID:10611295.PMID:15276459.PMID:17227549.PMID:17209125.PMID:17487278.PMID:18435824.PMID:18528439.gene:2164480.UniProt:Q9FKS4	NA	'35.1'	'not assigned.annotated'	'Serine/threonine-protein kinase ATR OS=Arabidopsis thaliana (sp|q9fks4|atr_arath : 165.0)'
Vitvi00g01175	28.3155	-0.142299	0.44429	-0.320285	0.748752	0.830081	28.3155	0.141092	0.37084	0.380466	0.7036	0.77942	28.3155	-0.316091	0.375675	-0.841395	0.400127	0.51363	28.3155	0.151743	0.364108	0.416751	0.67686	0.758099	VIT_00s1664g00010	AT4G38020.1	2.8e-27	122.5	1-to-1	NA	AT4G38020.1	tRNA/rRNA methyltransferase (SpoU) family protein	NA	NA	NA	NA	tRNA/rRNA methyltransferase (SpoU) family protein%3B FUNCTIONS IN: RNA binding%2C RNA methyltransferase activity%3B INVOLVED IN: RNA processing%3B LOCATED IN: cellular_component unknown%3B EXPRESSED IN: 21 plant structures%3B EXPRESSED DURING: 13 growth stages%3B CONTAINS InterPro DOMAIN/s: tRNA/rRNA methyltransferase%2C SpoU (InterPro:IPR001537)%3B Has 12174 Blast hits to 12170 proteins in 2688 …	****	gene:2121074.UniProt:Q8GYL4	NA	'35.2'	'not assigned.not annotated'	' no hits & (original description: none)'
Vitvi00g01182	0.178975	1.60619	6.54839	0.24528	0.80624	NA	0.178975	-0.846985	5.88922	-0.14382	0.885643	NA	0.178975	0	5.88968	0	1	NA	0.178975	0.836044	5.88968	0.141951	0.887119	NA		AT1G34070.1	1.4e-11	68.9	1-to-1	NA	AT1G34070.1	Copia-like polyprotein/retrotransposon	NA	NA	NA	NA	CONTAINS InterPro DOMAIN/s: Retrotransposon gag protein (InterPro:IPR005162)%3B BEST Arabidopsis thaliana protein match is: unknown protein (TAIR:AT5G48050.1)%3B Has 648 Blast hits to 647 proteins in 29 species: Archae - 0%3B Bacteria - 0%3B Metazoa - 16%3B Fungi - 25%3B Plants - 607%3B Viruses - 0%3B Other Eukaryotes - 0 (source: NCBI BLink).	***	gene:2009015.UniProt:Q9FX16	NA	'35.1'	'not assigned.annotated'	'Retrovirus-related Pol polyprotein from transposon RE2 OS=Arabidopsis thaliana (sp|q9zt94|polr2_arath : 146.0)'
Vitvi00g01183	11.0031	-0.187294	0.687486	-0.272434	0.785289	0.857799	11.0031	-0.900696	0.641742	-1.40352	0.160463	0.246071	11.0031	-1.97355	0.565952	-3.48714	0.000488224	0.00158436	11.0031	-2.83333	0.671697	-4.21816	2.46301e-05	0.000109181		AT1G62810.1	1.8e-30	131.7	1-to-1	NA	AT1G62810.1	Copper amine oxidase family protein	Encodes COPPER AMINE OXIDASE1 (CuAO1). Contributes to abscisic acid- and polyamine-induced nitric oxide biosynthesis and abscisic acid signal transduction.	"CuAO1"	NA	COPPER AMINE OXIDASE1	Copper amine oxidase family protein%3B FUNCTIONS IN: primary amine oxidase activity%2C quinone binding%2C copper ion binding%3B INVOLVED IN: oxidation reduction%2C amine metabolic process%3B LOCATED IN: endomembrane system%3B EXPRESSED IN: 22 plant structures%3B EXPRESSED DURING: 13 growth stages%3B CONTAINS InterPro DOMAIN/s: Copper amine oxidase%2C N-terminal (InterPro:IPR016182)%2C Copper amin…	****	gene:2026266.UniProt:Q8H1H9	NA	'35.1'	'not assigned.annotated'	'Primary amine oxidase OS=Arabidopsis thaliana (sp|q8h1h9|amo_arath : 128.0)'
Vitvi00g01185	0.389415	-0.625859	5.7417	-0.109002	0.913201	NA	0.389415	1.16346	5.10658	0.227836	0.819774	NA	0.389415	1.38642	5.14891	0.269264	0.787727	NA	0.389415	0.584004	5.12666	0.113915	0.909305	NA		AT2G38290.1	8.2e-31	132.9	1-to-many	AT2G38290.2	AT2G38290.1	ammonium transporter 2	encodes a high-affinity ammonium transporter%2C which is expressed in shoot and root. Expression in root and shoot is under nitrogen and carbon dioxide regulation%2C respectively.	"AMT2"	ATAMT2.ammonium transporter 2	ammonium transporter 2	ammonium transporter 2 (AMT2)%3B FUNCTIONS IN: ammonium transmembrane transporter activity%2C high affinity secondary active ammonium transmembrane transporter activity%3B INVOLVED IN: ammonium transport%2C response to nematode%2C cellular response to nitrogen starvation%3B LOCATED IN: plasma membrane%3B EXPRESSED IN: 24 plant structures%3B EXPRESSED DURING: 13 growth stages%3B CONTAINS InterPro …	****	PMID:17317660.gene:2042916.UniProt:Q9M6N7	NA	'35.1'	'not assigned.annotated'	'Ammonium transporter 3 member 2 OS=Oryza sativa subsp. japonica (sp|q851m9|amt32_orysj : 143.0)'
Vitvi00g01188	27.8386	-0.119449	0.690383	-0.173019	0.862637	0.9114	27.8386	-0.0671231	0.632443	-0.106133	0.915477	0.941881	27.8386	-1.06089	0.61068	-1.73722	0.0823475	0.142931	27.8386	-0.571472	0.611314	-0.934826	0.349878	0.457222	VIT_00s1693g00010	AT4G16440.1	3.3e-09	60.5	1-to-1	NA	AT4G16440.1	ferredoxin hydrogenase	Encodes a [FeFe]-hydrogenase-like protein named Gollum (for Growth in different Oxygen LeveLs in%26	NA	NA	NA	NA	NA	NA	NA	'35.2'	'not assigned.not annotated'	' no hits & (original description: none)'
Vitvi00g01189	0.122252	2.62926	6.55297	0.401232	0.688249	NA	0.122252	0	5.88922	0	1	NA	0.122252	1.38641	5.88968	0.235397	0.813901	NA	0.122252	0	5.88968	0	1	NA		NA	NA	NA	NA	NA	NA	NA	NA	NA	NA	NA	NA	NA	NA	NA	'35.2'	'not assigned.not annotated'	' no hits & (original description: none)'
Vitvi00g01190	1.73666	2.21056	2.66819	0.828487	0.407395	0.538099	1.73666	5.2026	2.14215	2.42868	0.0151538	0.0340932	1.73666	1.38643	2.4214	0.572576	0.566932	0.670122	1.73666	3.57438	2.15095	1.66177	0.0965596	0.160555		NA	NA	NA	NA	NA	NA	NA	NA	NA	NA	NA	NA	NA	NA	NA	'35.2'	'not assigned.not annotated'	' no hits & (original description: none)'
Vitvi00g01191	8.73909	0.0407064	0.725286	0.0561246	0.955243	0.974857	8.73909	-0.77391	0.733635	-1.0549	0.291472	0.396781	8.73909	0.169209	0.692251	0.244434	0.806895	0.864239	8.73909	-0.279121	0.760339	-0.3671	0.713544	0.78753	VIT_00s1707g00010	ATCG00770.1	5.1e-59	225.7	1-to-1	NA	ATCG00770.1	ribosomal protein S8	chloroplast 30S ribosomal protein S8	"RPS8"	NA	ribosomal protein S8	ribosomal protein S8 (RPS8)%3B FUNCTIONS IN: structural constituent of ribosome%3B INVOLVED IN: translation%3B LOCATED IN: plastid small ribosomal subunit%2C chloroplast%2C membrane%3B EXPRESSED IN: 22 plant structures%3B EXPRESSED DURING: 13 growth stages%3B CONTAINS InterPro DOMAIN/s: Ribosomal protein S8 (InterPro:IPR000630).	*****	PMID:17432890.PMID:18431481.gene:1009022932	NA	'17.6.2.2.8'	'Protein biosynthesis.organelle translation machineries.plastidial ribosome.small subunit proteome.psRPS8 component'	'Protein biosynthesis.organelle translation machineries.plastidial ribosome.small subunit proteome.psRPS8 component (original description: none)'
Vitvi00g01193	0.0346053	0	6.58482	0	1	NA	0.0346053	0	5.88922	0	1	NA	0.0346053	1.38641	5.88968	0.235397	0.813901	NA	0.0346053	0	5.88968	0	1	NA		NA	NA	NA	NA	NA	NA	NA	NA	NA	NA	NA	NA	NA	NA	NA	'35.2'	'not assigned.not annotated'	' no hits & (original description: none)'
Vitvi00g01194	0	NA	NA	NA	NA	NA	0	NA	NA	NA	NA	NA	0	NA	NA	NA	NA	NA	0	NA	NA	NA	NA	NA		NA	NA	NA	NA	NA	NA	NA	NA	NA	NA	NA	NA	NA	NA	NA	'35.2'	'not assigned.not annotated'	' no hits & (original description: none)'
Vitvi00g01196	44.0621	-0.91654	0.503612	-1.81993	0.0687692	0.137066	44.0621	1.2055	0.47287	2.54932	0.0107934	0.0254746	44.0621	-0.000348037	0.454163	-0.000766326	0.999389	1	44.0621	-0.372653	0.471902	-0.789683	0.429713	0.536658	VIT_00s1739g00010	ATMG00660.1	3e-45	181	1-to-1	NA	ATMG00660.1	hypothetical protein	NA	"ORF149"	NA	NA	unknown protein.	*****	gene:1009022750	NA	'35.1'	'not assigned.annotated'	'Uncharacterized mitochondrial protein AtMg00660 OS=Arabidopsis thaliana (sp|p93318|m660_arath : 129.0)'
Vitvi00g01198	0	NA	NA	NA	NA	NA	0	NA	NA	NA	NA	NA	0	NA	NA	NA	NA	NA	0	NA	NA	NA	NA	NA		NA	NA	NA	NA	NA	NA	NA	NA	NA	NA	NA	NA	NA	NA	NA	'35.2'	'not assigned.not annotated'	' no hits & (original description: none)'
Vitvi00g01201	5.47825	7.11881	1.60959	4.42276	9.74484e-06	7.00862e-05	5.47825	5.9514	1.53528	3.87643	0.000105999	0.000431706	5.47825	6.24809	1.53539	4.06938	4.71386e-05	0.000192247	5.47825	5.07845	1.547	3.28277	0.00102792	0.00311454		AT4G37640.1	4.4e-40	163.3	1-to-1	NA	AT4G37640.1	calcium ATPase 2	Encodes a calmodulin-regulated Ca(2+)-pump located in the endoplasmic reticulum. Belongs to plant 2B ATPase's with an N-terminal autoinhibitor.	"ACA2"	NA	calcium ATPase 2	calcium ATPase 2 (ACA2)%3B FUNCTIONS IN: calcium-transporting ATPase activity%2C calmodulin binding%2C calcium ion transmembrane transporter activity%3B INVOLVED IN: transport%3B LOCATED IN: endoplasmic reticulum%2C plasma membrane%2C endoplasmic reticulum membrane%3B EXPRESSED IN: 25 plant structures%3B EXPRESSED DURING: 15 growth stages%3B CONTAINS InterPro DOMAIN/s: ATPase%2C P-type%2C ATPase-…	*****	PMID:11782485.PMID:16618929.PMID:17317660.gene:2120095.UniProt:O81108	NA	'35.1'	'not assigned.annotated'	'Calcium-transporting ATPase 2. plasma membrane-type OS=Arabidopsis thaliana (sp|o81108|aca2_arath : 165.0)'
Vitvi00g01202	1.2252	2.93982	4.82795	0.608916	0.54258	0.663101	1.2252	4.25616	4.24858	1.00178	0.316448	0.423688	1.2252	3.87606	4.26428	0.908961	0.36337	0.476333	1.2252	3.7236	4.25428	0.875259	0.381433	0.489538		ATMG00860.1	3e-33	142.5	1-to-1	NA	ATMG00860.1	DNA/RNA polymerases superfamily protein	NA	"ORF158"	NA	NA	DNA/RNA polymerases superfamily protein.	*****	gene:1009022801	NA	'35.1'	'not assigned.annotated'	'Uncharacterized mitochondrial protein AtMg00860 OS=Arabidopsis thaliana (sp|p92523|m860_arath : 139.0)'
Vitvi00g01203	18.0402	0.368751	0.462384	0.7975	0.425161	0.554539	18.0402	-1.35898	0.594178	-2.28716	0.0221867	0.0472105	18.0402	0.21935	0.391422	0.560393	0.575211	0.677406	18.0402	0.0524726	0.78301	0.067014	0.946571	0.966532		NA	NA	NA	NA	NA	NA	NA	NA	NA	NA	NA	NA	NA	NA	NA	'35.2'	'not assigned.not annotated'	' no hits & (original description: none)'
Vitvi00g01204	0.031462	0	6.58482	0	1	NA	0.031462	0	5.88922	0	1	NA	0.031462	-0.537148	5.88968	-0.0912017	0.927332	NA	0.031462	0	5.88968	0	1	NA		NA	NA	NA	NA	NA	NA	NA	NA	NA	NA	NA	NA	NA	NA	NA	'35.2'	'not assigned.not annotated'	' no hits & (original description: none)'
Vitvi00g01205	61.7197	0.987431	0.334835	2.94901	0.00318798	0.0111138	61.7197	0.631296	0.321974	1.9607	0.0499137	0.093825	61.7197	0.337368	0.301164	1.12021	0.262623	0.369268	61.7197	0.451969	0.314743	1.43599	0.151004	0.232741		AT4G21700.1	2.7e-51	200.3	1-to-1	NA	AT4G21700.1	DUF2921 family protein%2C putative (DUF2921)	NA	NA	NA	NA	Protein of unknown function (DUF2921)%3B INVOLVED IN: biological_process unknown%3B LOCATED IN: chloroplast%3B EXPRESSED IN: 12 plant structures%3B EXPRESSED DURING: LP.04 four leaves visible%2C 4 anthesis%2C LP.10 ten leaves visible%2C petal differentiation and expansion stage%2C E expanded cotyledon stage%3B CONTAINS InterPro DOMAIN/s: Protein of unknown function DUF2921 (InterPro:IPR021319)%3B…	***	PMID:15028209.gene:2119077.UniProt:Q9SVS7	NA	'35.2'	'not assigned.not annotated'	' no hits & (original description: none)'
Vitvi00g01208	0	NA	NA	NA	NA	NA	0	NA	NA	NA	NA	NA	0	NA	NA	NA	NA	NA	0	NA	NA	NA	NA	NA		NA	NA	NA	NA	NA	NA	NA	NA	NA	NA	NA	NA	NA	NA	NA	'35.2'	'not assigned.not annotated'	' no hits & (original description: none)'
Vitvi00g01209	0	NA	NA	NA	NA	NA	0	NA	NA	NA	NA	NA	0	NA	NA	NA	NA	NA	0	NA	NA	NA	NA	NA		NA	NA	NA	NA	NA	NA	NA	NA	NA	NA	NA	NA	NA	NA	NA	'35.2'	'not assigned.not annotated'	' no hits & (original description: none)'
Vitvi00g01213	0	NA	NA	NA	NA	NA	0	NA	NA	NA	NA	NA	0	NA	NA	NA	NA	NA	0	NA	NA	NA	NA	NA		AT1G34070.1	1.1e-11	68.9	1-to-1	NA	AT1G34070.1	Copia-like polyprotein/retrotransposon	NA	NA	NA	NA	CONTAINS InterPro DOMAIN/s: Retrotransposon gag protein (InterPro:IPR005162)%3B BEST Arabidopsis thaliana protein match is: unknown protein (TAIR:AT5G48050.1)%3B Has 648 Blast hits to 647 proteins in 29 species: Archae - 0%3B Bacteria - 0%3B Metazoa - 16%3B Fungi - 25%3B Plants - 607%3B Viruses - 0%3B Other Eukaryotes - 0 (source: NCBI BLink).	***	gene:2009015.UniProt:Q9FX16	NA	'35.1'	'not assigned.annotated'	'Retrovirus-related Pol polyprotein from transposon RE1 OS=Arabidopsis thaliana (sp|q94hw2|polr1_arath : 153.0)'
Vitvi00g01216	1.12202	0.49322	1.98698	0.248226	0.80396	NA	1.12202	-1.10976	2.02196	-0.548853	0.583106	0.676441	1.12202	-0.15326	1.84217	-0.083195	0.933696	0.955117	1.12202	-2.89491	2.07661	-1.39406	0.163301	0.247847		AT1G48360.1	6.2e-25	114	1-to-many	AT1G48360.2.AT1G48360.4.AT1G48360.6	AT1G48360.1	zinc ion binding/nucleic acid binding/hydrolase	NA	NA	NA	NA	zinc ion binding%3Bnucleic acid binding%3Bhydrolases%2C acting on acid anhydrides%2C in phosphorus-containing anhydrides%3B FUNCTIONS IN: hydrolase activity%2C acting on acid anhydrides%2C in phosphorus-containing anhydrides%2C zinc ion binding%2C nucleic acid binding%3B INVOLVED IN: biological_process unknown%3B LOCATED IN: mitochondrion%3B EXPRESSED IN: 24 plant structures%3B EXPRESSED DURING: …	*****	gene:2007739.UniProt:Q5XVJ4-3	NA	'13.3.6.5.2.2.1'	'Cell cycle.mitosis and meiosis.meiotic recombination.meiotic crossover.class II interference-insensitive crossover pathway.MUS81-independent pathway.FAN1 endonuclease'	'Cell cycle.mitosis and meiosis.meiotic recombination.meiotic crossover.class II interference-insensitive crossover pathway.MUS81-independent pathway.FAN1 endonuclease (original description: none)'
Vitvi00g01217	0	NA	NA	NA	NA	NA	0	NA	NA	NA	NA	NA	0	NA	NA	NA	NA	NA	0	NA	NA	NA	NA	NA	VIT_00s1850g00010	AT5G01960.1	7.7e-30	127.9	1-to-1	NA	AT5G01960.1	RING/U-box superfamily protein	NA	NA	NA	NA	RING/U-box superfamily protein%3B FUNCTIONS IN: zinc ion binding%3B LOCATED IN: chloroplast%3B EXPRESSED IN: 23 plant structures%3B EXPRESSED DURING: 14 growth stages%3B CONTAINS InterPro DOMAIN/s: Zinc finger%2C RING-type%2C conserved site (InterPro:IPR017907)%2C Zinc finger%2C RING-type (InterPro:IPR001841)%2C Zinc finger%2C C3HC4 RING-type (InterPro:IPR018957)%3B BEST Arabidopsis thaliana prot…	****	gene:2185087.UniProt:Q8L610	NA	'35.2'	'not assigned.not annotated'	' no hits & (original description: none)'
Vitvi00g01219	0.127132	0	6.58482	0	1	NA	0.127132	-0.846953	5.88922	-0.143814	0.885647	NA	0.127132	1.38641	5.88968	0.235397	0.813901	NA	0.127132	0.836044	5.88968	0.141951	0.887119	NA	VIT_00s1869g00010	AT1G04410.1	2.4e-12	69.7	1-to-1	NA	AT1G04410.1	Lactate/malate dehydrogenase family protein	predicted to encode a cytosolic malate dehydrogenase.	"c-NAD-MDH1"	NA	cytosolic-NAD-dependent malate dehydrogenase 1	Lactate/malate dehydrogenase family protein%3B FUNCTIONS IN: in 6 functions%3B INVOLVED IN: response to cadmium ion%2C response to zinc ion%2C response to salt stress%3B LOCATED IN: in 7 components%3B EXPRESSED IN: 26 plant structures%3B EXPRESSED DURING: 15 growth stages%3B CONTAINS InterPro DOMAIN/s: Malate dehydrogenase%2C NAD-dependent%2C cytosolic (InterPro:IPR011274)%2C Lactate/malate dehyd…	****	PMID:14617066.PMID:15539469.PMID:15971193.PMID:16247729.PMID:16502469.PMID:17151019.PMID:17317660.PMID:17432890.PMID:17644812.PMID:17916636.PMID:18431481.PMID:18538804.PMID:16207701.PMID:21166475.PMID:23289948.gene:2018243.UniProt:P93819	NA	'35.2'	'not assigned.not annotated'	' no hits & (original description: none)'
Vitvi00g01220	0	NA	NA	NA	NA	NA	0	NA	NA	NA	NA	NA	0	NA	NA	NA	NA	NA	0	NA	NA	NA	NA	NA		NA	NA	NA	NA	NA	NA	NA	NA	NA	NA	NA	NA	NA	NA	NA	'35.2'	'not assigned.not annotated'	' no hits & (original description: none)'
Vitvi00g01221	0	NA	NA	NA	NA	NA	0	NA	NA	NA	NA	NA	0	NA	NA	NA	NA	NA	0	NA	NA	NA	NA	NA		AT4G02070.1	3.2e-06	51.2	1-to-many	AT4G02070.2	AT4G02070.1	MUTS homolog 6	encodes a DNA mismatch repair homolog of human MutS gene%2C MSH6. There are four MutS genes in Arabidopsis%2C MSH2%2C MSH3%2C MSH6%2C and MSH7%2C which all act as heterodimers and bind to 51-mer duplexes. MSH2*MSH6 bound the (+T) substrate strongly%2C (T/G) well%2C and (+AAG) no better than it did a (T/A) homoduplex.	"MSH6"	ATMSH6.ARABIDOPSIS THALIANA MUTS HOMOLOG 6	MUTS homolog 6	MUTS homolog 6 (MSH6)%3B FUNCTIONS IN: damaged DNA binding%3B INVOLVED IN: mismatch repair%3B LOCATED IN: chloroplast%3B EXPRESSED IN: 16 plant structures%3B EXPRESSED DURING: 8 growth stages%3B CONTAINS InterPro DOMAIN/s: DNA mismatch repair protein Msh6 (InterPro:IPR017261)%2C DNA mismatch repair protein MutS%2C clamp (InterPro:IPR007861)%2C DNA mismatch repair protein MutS%2C connector (InterP…	****	gene:2132232.UniProt:O04716	NA	'35.2'	'not assigned.not annotated'	' no hits & (original description: none)'
Vitvi00g01222	32.0276	5.28661	0.743371	7.11166	1.14653e-12	2.62895e-11	32.0276	8.38	1.26437	6.62781	3.40703e-11	4.48645e-10	32.0276	9.32946	1.2626	7.38909	1.47837e-13	2.32195e-12	32.0276	5.83568	1.12816	5.17276	2.30657e-07	1.54054e-06	VIT_00s1877g00010	AT3G13090.1	8.6e-29	128.3	1-to-1	NA	AT3G13090.1	multidrug resistance-associated protein 8	member of MRP subfamily	"ABCC6"	ATMRP8.multidrug resistance-associated protein 8.MRP8.multidrug resistance-associated protein 8	ATP-binding cassette C6	multidrug resistance-associated protein 8 (MRP8)%3B FUNCTIONS IN: ATPase activity%2C coupled to transmembrane movement of substances%3B INVOLVED IN: transport%2C transmembrane transport%3B LOCATED IN: plasma membrane%3B EXPRESSED IN: 10 plant structures%3B EXPRESSED DURING: 6 growth stages%3B CONTAINS InterPro DOMAIN/s: ATPase%2C AAA+ type%2C core (InterPro:IPR003593)%2C ABC transporter-like (Int…	*****	PMID:11346655.PMID:17151019.gene:2090038.UniProt:Q8VZZ4	NA	'35.1'	'not assigned.annotated'	'Cytochrome b561 and DOMON domain-containing protein At3g07570 OS=Arabidopsis thaliana (sp|q0wrw8|b561k_arath : 107.0)'
Vitvi00g01223	284.995	2.43493	0.466532	5.21921	1.79687e-07	1.85669e-06	284.995	3.67593	0.41958	8.76098	1.93553e-18	5.83091e-17	284.995	0.784805	0.412158	1.90414	0.0568923	0.104592	284.995	0.637656	0.409792	1.55605	0.119696	0.191677	VIT_00s1881g00010	NA	NA	NA	NA	NA	NA	NA	NA	NA	NA	NA	NA	NA	NA	NA	'35.2'	'not assigned.not annotated'	' no hits & (original description: none)'
Vitvi00g01224	0.0976368	0	6.58482	0	1	NA	0.0976368	0.114844	5.88922	0.0195007	0.984442	NA	0.0976368	0	5.88968	0	1	NA	0.0976368	0	5.88968	0	1	NA	VIT_00s1889g00010	AT1G70600.1	5.2e-15	81.3	1-to-1	NA	AT1G70600.1	Ribosomal protein L18e/L15 superfamily protein	NA	NA	NA	NA	Ribosomal protein L18e/L15 superfamily protein%3B FUNCTIONS IN: structural constituent of ribosome%3B INVOLVED IN: translation%3B LOCATED IN: cytosolic ribosome%2C ribosome%2C cytosolic large ribosomal subunit%2C membrane%3B EXPRESSED IN: guard cell%2C leaf%3B CONTAINS InterPro DOMAIN/s: Ribosomal protein L18e/L15 (InterPro:IPR021131)%2C Ribosomal protein L15%2C conserved site (InterPro:IPR001196…	*****	PMID:15734919.PMID:17432890.PMID:17934214.gene:3690792.UniProt:P49637	NA	'35.1'	'not assigned.annotated'	'60S ribosomal protein L27a-3 OS=Arabidopsis thaliana (sp|p49637|r27a3_arath : 88.2)'
Vitvi00g01227	754.739	0.0946506	0.334467	0.282989	0.777185	0.851627	754.739	-0.433997	0.302056	-1.43681	0.150772	0.23434	754.739	0.0803142	0.300425	0.267335	0.789211	0.851004	754.739	-1.32153	0.303182	-4.35888	1.30732e-05	6.16201e-05	VIT_00s1918g00010	AT3G10600.1	5.9e-49	193.4	1-to-1	NA	AT3G10600.1	cationic amino acid transporter 7	Encodes a member of the cationic amino acid transporter (CAT) subfamily of amino acid polyamine choline transporters.	"CAT7"	NA	cationic amino acid transporter 7	cationic amino acid transporter 7 (CAT7)%3B FUNCTIONS IN: cationic amino acid transmembrane transporter activity%3B INVOLVED IN: transport%2C amino acid transport%2C transmembrane transport%3B LOCATED IN: membrane%3B EXPRESSED IN: 7 plant structures%3B EXPRESSED DURING: LP.02 two leaves visible%2C petal differentiation and expansion stage%3B CONTAINS InterPro DOMAIN/s: Cationic amino acid transpo…	****	gene:2075744.UniProt:Q9SQZ0	NA	'35.1'	'not assigned.annotated'	'Cationic amino acid transporter 6. chloroplastic OS=Arabidopsis thaliana (sp|q9lz20|caat6_arath : 172.0)'
Vitvi00g01229	1.08716	4.88311	2.18993	2.2298	0.0257609	NA	1.08716	0.114738	2.28451	0.0502244	0.959944	0.973482	1.08716	4.21262	2.02681	2.07845	0.0376682	0.0735912	1.08716	2.4468	2.03963	1.19963	0.230283	0.327193		ATMG00860.1	3.3e-34	145.6	1-to-1	NA	ATMG00860.1	DNA/RNA polymerases superfamily protein	NA	"ORF158"	NA	NA	DNA/RNA polymerases superfamily protein.	*****	gene:1009022801	NA	'35.1'	'not assigned.annotated'	'Uncharacterized mitochondrial protein AtMg00860 OS=Arabidopsis thaliana (sp|p92523|m860_arath : 141.0)'
Vitvi00g01231	113.789	-1.78719	0.420807	-4.24706	2.16594e-05	0.000143304	113.789	-1.22814	0.370979	-3.31055	0.000931137	0.0029855	113.789	-2.15277	0.375305	-5.73604	9.69136e-09	7.6667e-08	113.789	-2.97214	0.396285	-7.50001	6.38114e-14	1.1655e-12	VIT_00s1944g00010	AT3G49170.1	2.2e-223	773.5	1-to-1	NA	AT3G49170.1	Tetratricopeptide repeat (TPR)-like superfamily protein	NA	"EMB2261"	NA	embryo defective 2261	embryo defective 2261 (EMB2261)%3B INVOLVED IN: embryo development ending in seed dormancy%3B LOCATED IN: chloroplast%3B CONTAINS InterPro DOMAIN/s: Pentatricopeptide repeat (InterPro:IPR002885)%3B BEST Arabidopsis thaliana protein match is: Tetratricopeptide repeat (TPR)-like superfamily protein (TAIR:AT3G57430.1)%3B Has 48732 Blast hits to 14187 proteins in 273 species: Archae - 0%3B Bacteria -…	*****	PMID:15647901.gene:2082885.UniProt:Q5G1T1	NA	'16.10.3.4.19'	'RNA processing.organelle machineries.RNA editing.plastidial RNA editing.ECD1 RNA editing factor'	'RNA processing.organelle machineries.RNA editing.plastidial RNA editing.ECD1 RNA editing factor (original description: none)'
Vitvi00g01232	0	NA	NA	NA	NA	NA	0	NA	NA	NA	NA	NA	0	NA	NA	NA	NA	NA	0	NA	NA	NA	NA	NA		AT5G07870.1	1.8e-37	153.3	1-to-many	AT5G42830.1	AT5G07870.1	HXXXD-type acyl-transferase family protein	NA	NA	NA	NA	HXXXD-type acyl-transferase family protein%3B FUNCTIONS IN: transferase activity%2C transferring acyl groups other than amino-acyl groups%2C transferase activity%3B INVOLVED IN: biological_process unknown%3B LOCATED IN: cellular_component unknown%3B EXPRESSED IN: 20 plant structures%3B EXPRESSED DURING: 12 growth stages%3B CONTAINS InterPro DOMAIN/s: Transferase (InterPro:IPR003480)%3B BEST Arabi…	*****	gene:3442416.UniProt:Q9SD97	NA	'35.2'	'not assigned.not annotated'	' no hits & (original description: none)'
Vitvi00g01235	0	NA	NA	NA	NA	NA	0	NA	NA	NA	NA	NA	0	NA	NA	NA	NA	NA	0	NA	NA	NA	NA	NA		AT3G61130.1	1.8e-18	89	1-to-1	NA	AT3G61130.1	galacturonosyltransferase 1	Encodes a protein with putative galacturonosyltransferase activity.	"GAUT1"	LGT1	galacturonosyltransferase 1	galacturonosyltransferase 1 (GAUT1)%3B CONTAINS InterPro DOMAIN/s: Glycosyl transferase%2C family 8 (InterPro:IPR002495)%3B BEST Arabidopsis thaliana protein match is: galacturonosyltransferase 3 (TAIR:AT4G38270.2)%3B Has 1521 Blast hits to 1503 proteins in 273 species: Archae - 4%3B Bacteria - 491%3B Metazoa - 148%3B Fungi - 2%3B Plants - 840%3B Viruses - 0%3B Other Eukaryotes - 36 (source: NCBI…	****	PMID:16618929.PMID:17237350.gene:2098835.UniProt:Q9LE59	NA	'35.1'	'not assigned.annotated'	'Polygalacturonate 4-alpha-galacturonosyltransferase OS=Arabidopsis thaliana (sp|q9le59|gaut1_arath : 87.8)'
Vitvi00g01236	0.905662	3.0224	2.84054	1.06402	0.287318	NA	0.905662	3.63149	2.56144	1.41775	0.156264	0.240983	0.905662	-0.942146	2.52635	-0.372927	0.709203	0.788216	0.905662	2.45352	2.6196	0.936602	0.348964	0.456289	GSVIVT01005579001	AT2G22610.1	1.4e-16	84.7	1-to-many	AT2G22610.2.AT2G22610.3	AT2G22610.1	Di-glucose binding protein with Kinesin motor domain-containing protein	NA	NA	NA	NA	Di-glucose binding protein with Kinesin motor domain%3B FUNCTIONS IN: microtubule motor activity%2C ATP binding%3B INVOLVED IN: microtubule-based movement%3B EXPRESSED IN: 20 plant structures%3B EXPRESSED DURING: 10 growth stages%3B CONTAINS InterPro DOMAIN/s: Kinesin%2C motor region%2C conserved site (InterPro:IPR019821)%2C Malectin/receptor-like protein kinase (InterPro:IPR021720)%2C Kinesin%2C…	****	PMID:16530461.gene:2066029.UniProt:F4IJK6	NA	'35.1'	'not assigned.annotated'	'Kinesin-like protein KIN-14R OS=Oryza sativa subsp. japonica (sp|q2qm62|kn14r_orysj : 95.1)'
Vitvi00g01237	0	NA	NA	NA	NA	NA	0	NA	NA	NA	NA	NA	0	NA	NA	NA	NA	NA	0	NA	NA	NA	NA	NA		NA	NA	NA	NA	NA	NA	NA	NA	NA	NA	NA	NA	NA	NA	NA	'35.2'	'not assigned.not annotated'	' no hits & (original description: none)'
Vitvi00g01238	15.1888	-0.693818	1.85396	-0.374236	0.708229	0.798591	15.1888	-1.67533	1.73166	-0.967469	0.33331	0.440629	15.1888	-0.402144	1.65249	-0.243356	0.80773	0.864845	15.1888	1.00571	1.68042	0.598491	0.549513	0.649433	VIT_00s1959g00010	AT1G31070.1	1.3e-22	107.1	1-to-many	AT1G31070.2	AT1G31070.1	N-acetylglucosamine-1-phosphate uridylyltransferase 1	Encodes a protein that functions as an N-acetylglucosamine-1-phosphate uridylyltransferase that catalyzes the formation of UDP-N-acetylglucosamine (UDP-GlcNAc). This is an essential precursor for glycolipid and glycoprotein synthesis and is also used for regulatory protein modification in signaling pathways. The enzyme can also catalyze the reverse reaction using both UDP-GlcNAc and the less comm…	"GlcNAc1pUT1"	GLCNA.UT1.N-acetylglucosamine-1-phosphate uridylyltransferase 1	N-acetylglucosamine-1-phosphate uridylyltransferase 1	N-acetylglucosamine-1-phosphate uridylyltransferase 1 (GlcNAc1pUT1)%3B FUNCTIONS IN: UDP-N-acetylglucosamine diphosphorylase activity%2C UDP-N-acetylgalactosamine diphosphorylase activity%3B INVOLVED IN: UDP-N-acetylglucosamine metabolic process%2C UDP-N-acetylgalactosamine metabolic process%3B LOCATED IN: plasma membrane%3B EXPRESSED IN: 25 plant structures%3B EXPRESSED DURING: 13 growth stages%…	*****	PMID:17644812.gene:2015790	NA	'35.1'	'not assigned.annotated'	'UDP-N-acetylglucosamine diphosphorylase 1 OS=Arabidopsis thaliana (sp|q940s3|uap1_arath : 103.0)'
Vitvi00g01239	0.281828	-0.621134	6.57192	-0.0945133	0.924701	NA	0.281828	-0.710997	5.86452	-0.121237	0.903503	NA	0.281828	-0.537148	5.88968	-0.0912017	0.927332	NA	0.281828	0.836044	5.88968	0.141951	0.887119	NA	VIT_00s1963g00010	AT1G08420.1	1.1e-19	94.7	1-to-many	AT2G27210.1	AT1G08420.1	BRI1 suppressor 1 (BSU1)-like 2	NA	"BSL2"	NA	BRI1 suppressor 1 (BSU1)-like 2	BRI1 suppressor 1 (BSU1)-like 2 (BSL2)%3B FUNCTIONS IN: hydrolase activity%2C manganese ion binding%2C protein serine/threonine phosphatase activity%2C phosphoprotein phosphatase activity%2C iron ion binding%3B INVOLVED IN: biological_process unknown%3B LOCATED IN: plasma membrane%3B EXPRESSED IN: male gametophyte%2C guard cell%2C cultured cell%2C pollen tube%3B EXPRESSED DURING: M germinated pol…	****	PMID:17317660.PMID:17644812.PMID:21166475.gene:2201775.UniProt:Q9SJF0	NA	'35.1'	'not assigned.annotated'	'Serine/threonine-protein phosphatase BSL2 homolog OS=Oryza sativa subsp. japonica (sp|q2qm47|bsl2_orysj : 121.0)'
Vitvi00g01242	0.259201	0	6.58482	0	1	NA	0.259201	0	5.88922	0	1	NA	0.259201	0	5.88968	0	1	NA	0.259201	-3.2933	5.80731	-0.567095	0.57065	NA	VIT_00s1987g00010	AT3G01160.1	2.1e-11	70.1	1-to-1	NA	AT3G01160.1	pre-rRNA-processing ESF1-like protein	NA	NA	NA	NA	FUNCTIONS IN: molecular_function unknown%3B INVOLVED IN: biological_process unknown%3B LOCATED IN: cytosol%2C nucleus%3B EXPRESSED IN: 22 plant structures%3B EXPRESSED DURING: 13 growth stages%3B CONTAINS InterPro DOMAIN/s: NUC153 (InterPro:IPR012580)%3B Has 36638 Blast hits to 21323 proteins in 1057 species: Archae - 109%3B Bacteria - 2369%3B Metazoa - 13796%3B Fungi - 4858%3B Plants - 1657%3B V…	****	PMID:18433157.gene:2102126.UniProt:Q9MAC6	NA	'35.2'	'not assigned.not annotated'	' no hits & (original description: none)'
Vitvi00g01243	9079.34	0.419764	0.400463	1.0482	0.294547	0.422886	9079.34	0.725527	0.35805	2.02633	0.0427311	0.0822308	9079.34	1.36887	0.358098	3.8226	0.000132053	0.000486916	9079.34	0.533553	0.358057	1.49014	0.136188	0.21347	VIT_00s1995g00010	AT4G37870.1	4.7e-69	261.2	1-to-1	NA	AT4G37870.1	phosphoenolpyruvate carboxykinase 1	Encodes a phosphoenolpyruvate carboxykinase that localizes to the cytosol.	"PCK1"	PEPCK.PHOSPHOENOLPYRUVATE CARBOXYKINASE	phosphoenolpyruvate carboxykinase 1	phosphoenolpyruvate carboxykinase 1 (PCK1)%3B FUNCTIONS IN: phosphoenolpyruvate carboxykinase activity%2C purine nucleotide binding%2C phosphoenolpyruvate carboxykinase (ATP) activity%2C ATP binding%3B INVOLVED IN: defense response to fungus%2C incompatible interaction%2C response to cadmium ion%2C cellular response to phosphate starvation%2C gluconeogenesis%3B LOCATED IN: cytosol%2C nucleolus%2C…	****	PMID:15496452.PMID:16502469.PMID:17432890.PMID:18182375.PMID:18433157.gene:2137593.UniProt:Q9T074	NA	'50.4.1'	'Enzyme classification.EC_4 lyases.EC_4.1 carbon-carbon lyase'	'Enzyme classification.EC_4 lyases.EC_4.1 carbon-carbon lyase(50.4.1 : 340.6) & Phosphoenolpyruvate carboxykinase (ATP) OS=Arabidopsis thaliana (sp|q9t074|pcka_arath : 201.0) (original description: none)'
Vitvi00g01245	13.6029	2.71723	0.563541	4.82171	1.42329e-06	1.22739e-05	13.6029	1.54533	0.596869	2.58906	0.00962384	0.0230628	13.6029	1.25377	0.463617	2.70431	0.00684459	0.0166976	13.6029	1.55778	0.541383	2.87741	0.00400953	0.0103394		AT4G23160.2	3.5e-138	490.7	1-to-many	AT4G23160.3	AT4G23160.2	cysteine-rich RECEPTOR-like kinase	NA	"CRK8"	NA	cysteine-rich RLK (RECEPTOR-like protein kinase) 8	NA	NA	NA	NA	'35.1'	'not assigned.annotated'	'Retrovirus-related Pol polyprotein from transposon RE1 OS=Arabidopsis thaliana (sp|q94hw2|polr1_arath : 553.0)'
Vitvi00g01247	173.938	-0.613295	0.195649	-3.13466	0.00172051	0.00664262	173.938	-0.506459	0.177682	-2.85037	0.00436685	0.0116126	173.938	-0.0293086	0.169512	-0.1729	0.86273	0.904204	173.938	0.144178	0.182952	0.788066	0.430658	0.537541		AT1G11990.1	3.2e-40	165.2	1-to-many	AT1G11990.2	AT1G11990.1	O-fucosyltransferase family protein	NA	NA	NA	NA	O-fucosyltransferase family protein%3B CONTAINS InterPro DOMAIN/s: GDP-fucose protein O-fucosyltransferase (InterPro:IPR019378)%3B BEST Arabidopsis thaliana protein match is: O-fucosyltransferase family protein (TAIR:AT1G62330.1)%3B Has 811 Blast hits to 808 proteins in 28 species: Archae - 0%3B Bacteria - 0%3B Metazoa - 0%3B Fungi - 0%3B Plants - 811%3B Viruses - 0%3B Other Eukaryotes - 0 (sourc…	**	gene:2008934.UniProt:F4IAL1	NA	'35.1'	'not assigned.annotated'	'O-fucosyltransferase 2 OS=Arabidopsis thaliana (sp|f4ial1|ofut2_arath : 155.0)'
Vitvi00g01250	6.90372	4.92968	1.1312	4.35793	1.31299e-05	9.18092e-05	6.90372	3.40395	1.26482	2.69125	0.00711851	0.0177729	6.90372	7.46872	1.35542	5.51025	3.58321e-08	2.58719e-07	6.90372	2.71406	1.26823	2.14004	0.0323513	0.0640556		AT1G13710.1	1.5e-22	103.6	1-to-1	NA	AT1G13710.1	cytochrome P450%2C family 78%2C subfamily A%2C polypeptide 5	Encodes the cytochrome P450 CYP78A5 monooxygenase. Contributes to the generation of a growth-stimulating signal distinct from the classical phytohormones that prevents proliferation arrest%2C promoting organ growth.	"CYP78A5"	KLU.KLUH	cytochrome P450%2C family 78%2C subfamily A%2C polypeptide 5	cytochrome P450%2C family 78%2C subfamily A%2C polypeptide 5 (CYP78A5)%3B FUNCTIONS IN: electron carrier activity%2C monooxygenase activity%2C iron ion binding%2C oxygen binding%2C heme binding%3B INVOLVED IN: in 7 processes%3B LOCATED IN: endoplasmic reticulum%3B EXPRESSED IN: 10 plant structures%3B EXPRESSED DURING: F mature embryo stage%2C petal differentiation and expansion stage%2C E expande…	****	gene:2023847.UniProt:Q9LMX7	NA	'35.1'	'not assigned.annotated'	'Cytochrome P450 78A5 OS=Arabidopsis thaliana (sp|q9lmx7|c78a5_arath : 89.7)'
Vitvi00g01258	0	NA	NA	NA	NA	NA	0	NA	NA	NA	NA	NA	0	NA	NA	NA	NA	NA	0	NA	NA	NA	NA	NA	VIT_00s2077g00010	AT5G59810.1	2e-28	123.2	1-to-1	NA	AT5G59810.1	Subtilase family protein	NA	"SBT5.4"	NA	NA	SBT5.4%3B FUNCTIONS IN: identical protein binding%2C serine-type endopeptidase activity%3B INVOLVED IN: proteolysis%2C negative regulation of catalytic activity%3B EXPRESSED IN: 12 plant structures%3B EXPRESSED DURING: 4 anthesis%2C C globular stage%2C petal differentiation and expansion stage%3B CONTAINS InterPro DOMAIN/s: Protease-associated PA (InterPro:IPR003137)%2C Proteinase inhibitor%2C pr…	*****	PMID:15894741.gene:2168056.UniProt:F4JXC5	NA	'35.1'	'not assigned.annotated'	'Subtilisin-like protease SBT5.4 OS=Arabidopsis thaliana (sp|f4jxc5|sbt54_arath : 121.0)'
Vitvi00g01259	0.111127	-0.176309	6.58027	-0.0267936	0.978624	NA	0.111127	0.114826	5.88922	0.0194977	0.984444	NA	0.111127	0	5.88968	0	1	NA	0.111127	0	5.88968	0	1	NA	VIT_00s2077g00020	AT3G57520.1	1.6e-29	129.4	1-to-many	AT3G57520.2.AT3G57520.3	AT3G57520.1	seed imbibition 2	SIP2 encodes a raffinose-specific alpha-galactosidase that catalyzes the breakdown of raffinose into alpha-galatose and sucrose. This enzyme may function in unloading raffinose from the phloem as part of sink metabolism. Although it was originally predicted to act as a raffinose synthase (RS)%2C that activity was not observed for recombinant SIP2.	"SIP2"	AtSIP2.seed imbibition 2.RS2.raffinose synthase 2	seed imbibition 2	seed imbibition 2 (SIP2)%3B CONTAINS InterPro DOMAIN/s: Glycoside hydrolase%2C catalytic core (InterPro:IPR017853)%2C Raffinose synthase (InterPro:IPR008811)%3B BEST Arabidopsis thaliana protein match is: seed imbibition 1 (TAIR:AT1G55740.1)%3B Has 528 Blast hits to 504 proteins in 147 species: Archae - 29%3B Bacteria - 95%3B Metazoa - 0%3B Fungi - 82%3B Plants - 312%3B Viruses - 0%3B Other Eukar…	****	gene:2103487.UniProt:Q94A08	NA	'35.1'	'not assigned.annotated'	'Probable galactinol--sucrose galactosyltransferase 1 OS=Arabidopsis thaliana (sp|q84vx0|rfs1_arath : 122.0)'
Vitvi00g01264	0.353897	-1.01185	6.56148	-0.154211	0.877443	NA	0.353897	-0.847027	5.88922	-0.143827	0.885637	NA	0.353897	-2.98016	5.8015	-0.513687	0.607471	NA	0.353897	-1.08752	5.88968	-0.184648	0.853505	NA		AT5G01960.1	3e-13	72	1-to-1	NA	AT5G01960.1	RING/U-box superfamily protein	NA	NA	NA	NA	RING/U-box superfamily protein%3B FUNCTIONS IN: zinc ion binding%3B LOCATED IN: chloroplast%3B EXPRESSED IN: 23 plant structures%3B EXPRESSED DURING: 14 growth stages%3B CONTAINS InterPro DOMAIN/s: Zinc finger%2C RING-type%2C conserved site (InterPro:IPR017907)%2C Zinc finger%2C RING-type (InterPro:IPR001841)%2C Zinc finger%2C C3HC4 RING-type (InterPro:IPR018957)%3B BEST Arabidopsis thaliana prot…	****	gene:2185087.UniProt:Q8L610	NA	'35.2'	'not assigned.not annotated'	' no hits & (original description: none)'
Vitvi00g01265	0	NA	NA	NA	NA	NA	0	NA	NA	NA	NA	NA	0	NA	NA	NA	NA	NA	0	NA	NA	NA	NA	NA		NA	NA	NA	NA	NA	NA	NA	NA	NA	NA	NA	NA	NA	NA	NA	'35.2'	'not assigned.not annotated'	' no hits & (original description: none)'
Vitvi00g01266	91.3519	0.137926	0.237228	0.581409	0.560965	0.679102	91.3519	0.335315	0.216574	1.54827	0.121556	0.196759	91.3519	0.333943	0.204111	1.63609	0.101821	0.170701	91.3519	0.439871	0.221771	1.98344	0.047318	0.0886227		AT5G65685.1	2.7e-18	92.4	1-to-many	AT5G65685.10.AT5G65685.11.AT5G65685.12.AT5G65685.2.AT5G65685.3.AT5G65685.4.AT5G65685.5.AT5G65685.6.AT5G65685.7.AT5G65685.8.AT5G65685.9	AT5G65685.1	UDP-Glycosyltransferase superfamily protein	NA	NA	NA	NA	UDP-Glycosyltransferase superfamily protein%3B FUNCTIONS IN: starch synthase activity%3B LOCATED IN: chloroplast%3B EXPRESSED IN: 24 plant structures%3B EXPRESSED DURING: 15 growth stages%3B CONTAINS InterPro DOMAIN/s: Starch synthase%2C catalytic domain (InterPro:IPR013534)%3B BEST Arabidopsis thaliana protein match is: starch synthase 4 (TAIR:AT4G18240.1)%3B Has 30201 Blast hits to 17322 protei…	****	PMID:16098110.gene:3710007.UniProt:Q8GWC5	NA	'35.2'	'not assigned.not annotated'	' no hits & (original description: none)'
Vitvi00g01267	132.432	1.4439	0.356542	4.04972	5.12793e-05	0.000309999	132.432	2.05057	0.334242	6.13501	8.51544e-10	9.11026e-09	132.432	0.293571	0.312292	0.940055	0.347189	0.459985	132.432	-0.0659414	0.31941	-0.206447	0.836441	0.884958		AT4G27290.2	1.3e-107	388.7	1-to-1	NA	AT4G27290.2	S-locus lectin protein kinase family protein	NA	NA	NA	NA	NA	NA	NA	NA	'35.1'	'not assigned.annotated'	'G-type lectin S-receptor-like serine/threonine-protein kinase At4g27290 OS=Arabidopsis thaliana (sp|o81832|y4729_arath : 375.0)'
Vitvi00g01271	0	NA	NA	NA	NA	NA	0	NA	NA	NA	NA	NA	0	NA	NA	NA	NA	NA	0	NA	NA	NA	NA	NA		NA	NA	NA	NA	NA	NA	NA	NA	NA	NA	NA	NA	NA	NA	NA	'35.2'	'not assigned.not annotated'	' no hits & (original description: none)'
Vitvi00g01272	0	NA	NA	NA	NA	NA	0	NA	NA	NA	NA	NA	0	NA	NA	NA	NA	NA	0	NA	NA	NA	NA	NA		NA	NA	NA	NA	NA	NA	NA	NA	NA	NA	NA	NA	NA	NA	NA	'35.2'	'not assigned.not annotated'	' no hits & (original description: none)'
Vitvi00g01275	0.0371019	-0.621161	6.57192	-0.0945174	0.924698	NA	0.0371019	0	5.88922	0	1	NA	0.0371019	0	5.88968	0	1	NA	0.0371019	0	5.88968	0	1	NA		NA	NA	NA	NA	NA	NA	NA	NA	NA	NA	NA	NA	NA	NA	NA	'35.2'	'not assigned.not annotated'	' no hits & (original description: none)'
Vitvi00g01276	0.109616	0	6.58482	0	1	NA	0.109616	0	5.88922	0	1	NA	0.109616	1.97359	5.87802	0.335758	0.737054	NA	0.109616	0.836044	5.88968	0.141951	0.887119	NA	VIT_00s2182g00010	AT1G08420.1	9.5e-20	95.9	1-to-many	AT2G27210.1	AT1G08420.1	BRI1 suppressor 1 (BSU1)-like 2	NA	"BSL2"	NA	BRI1 suppressor 1 (BSU1)-like 2	BRI1 suppressor 1 (BSU1)-like 2 (BSL2)%3B FUNCTIONS IN: hydrolase activity%2C manganese ion binding%2C protein serine/threonine phosphatase activity%2C phosphoprotein phosphatase activity%2C iron ion binding%3B INVOLVED IN: biological_process unknown%3B LOCATED IN: plasma membrane%3B EXPRESSED IN: male gametophyte%2C guard cell%2C cultured cell%2C pollen tube%3B EXPRESSED DURING: M germinated pol…	****	PMID:17317660.PMID:17644812.PMID:21166475.gene:2201775.UniProt:Q9SJF0	NA	'35.1'	'not assigned.annotated'	'Serine/threonine-protein phosphatase BSL2 OS=Arabidopsis thaliana (sp|q9sjf0|bsl2_arath : 117.0)'
Vitvi00g01278	0	NA	NA	NA	NA	NA	0	NA	NA	NA	NA	NA	0	NA	NA	NA	NA	NA	0	NA	NA	NA	NA	NA		NA	NA	NA	NA	NA	NA	NA	NA	NA	NA	NA	NA	NA	NA	NA	'35.2'	'not assigned.not annotated'	' no hits & (original description: none)'
Vitvi00g01279	43.8222	9.66829	1.37211	7.04627	1.83772e-12	4.09081e-11	43.8222	9.53433	1.33377	7.14841	8.77861e-13	1.44411e-11	43.8222	8.34815	1.33758	6.24122	4.3417e-10	4.25301e-09	43.8222	8.45567	1.33541	6.33187	2.42201e-10	2.68474e-09	VIT_00s2191g00010	AT5G56970.1	5.2e-83	307	1-to-1	NA	AT5G56970.1	cytokinin oxidase 3	It encodes a protein whose sequence is similar to cytokinin oxidase/dehydrogenase%2C which catalyzes the degradation of cytokinins.	"CKX3"	ATCKX3	cytokinin oxidase 3	cytokinin oxidase 3 (CKX3)%3B FUNCTIONS IN: primary amine oxidase activity%2C cytokinin dehydrogenase activity%3B INVOLVED IN: cytokinin catabolic process%3B LOCATED IN: vacuole%3B EXPRESSED IN: 14 plant structures%3B EXPRESSED DURING: 6 growth stages%3B CONTAINS InterPro DOMAIN/s: Cytokinin dehydrogenase 1%2C FAD/cytokinin binding domain (InterPro:IPR015345)%2C FAD-binding%2C type 2 (InterPro:IP…	****	gene:2164614.UniProt:Q9LTS3	NA	'35.1'	'not assigned.annotated'	'Cytokinin dehydrogenase 3 OS=Arabidopsis thaliana (sp|q9lts3|ckx3_arath : 229.0)'
Vitvi00g01285	46.9998	0.300396	0.418938	0.717042	0.473348	0.600174	46.9998	-0.544523	0.393783	-1.3828	0.166726	0.253795	46.9998	-0.526349	0.376073	-1.39959	0.161635	0.249507	46.9998	-0.344549	0.391591	-0.87987	0.37893	0.486921	VIT_00s2207g00010	AT2G35020.1	1.4e-17	89.7	1-to-1	NA	AT2G35020.1	N-acetylglucosamine-1-phosphate uridylyltransferase 2	Encodes a protein that functions as an N-acetylglucosamine-1-phosphate uridylyltransferase that catalyzes the formation of UDP-N-acetylglucosamine (UDP-GlcNAc). This is an essential precursor for glycolipid and glycoprotein synthesis and is also used for regulatory protein modification in signaling pathways. The enzyme can also catalyze the reverse reaction using both UDP-GlcNAc and the less comm…	"GlcNAc1pUT2"	GLCNA.UT2.N-acetylglucosamine-1-phosphate uridylyltransferase 2	N-acetylglucosamine-1-phosphate uridylyltransferase 2	N-acetylglucosamine-1-phosphate uridylyltransferase 2 (GlcNAc1pUT2)%3B CONTAINS InterPro DOMAIN/s: UTP--glucose-1-phosphate uridylyltransferase (InterPro:IPR002618)%3B BEST Arabidopsis thaliana protein match is: N-acetylglucosamine-1-phosphate uridylyltransferase 1 (TAIR:AT1G31070.2)%3B Has 1547 Blast hits to 1541 proteins in 446 species: Archae - 0%3B Bacteria - 380%3B Metazoa - 421%3B Fungi - 2…	****	PMID:21166475.gene:2044786.UniProt:O64765	NA	'35.2'	'not assigned.not annotated'	' no hits & (original description: none)'
Vitvi00g01286	0.0489627	0	6.58482	0	1	NA	0.0489627	0	5.88922	0	1	NA	0.0489627	1.38641	5.88968	0.235397	0.813901	NA	0.0489627	0	5.88968	0	1	NA		NA	NA	NA	NA	NA	NA	NA	NA	NA	NA	NA	NA	NA	NA	NA	'35.2'	'not assigned.not annotated'	' no hits & (original description: none)'
Vitvi00g01287	0.0703481	-0.176311	6.58027	-0.0267939	0.978624	NA	0.0703481	1.07647	5.88922	0.182787	0.854965	NA	0.0703481	0	5.88968	0	1	NA	0.0703481	0	5.88968	0	1	NA	VIT_00s2215g00010	AT4G15093.1	3.8e-16	83.2	1-to-1	NA	AT4G15093.1	catalytic LigB subunit of aromatic ring-opening dioxygenase family	NA	"LigB"	NA	NA	catalytic LigB subunit of aromatic ring-opening dioxygenase family%3B FUNCTIONS IN: oxidoreductase activity%2C ferrous iron binding%2C zinc ion binding%2C oxidoreductase activity%2C acting on single donors with incorporation of molecular oxygen%3B INVOLVED IN: oxidation reduction%2C cellular aromatic compound metabolic process%3B LOCATED IN: cellular_component unknown%3B EXPRESSED IN: 24 plant st…	****	gene:3705185.UniProt:Q949R4	NA	'35.1'	'not assigned.annotated'	'Extradiol ring-cleavage dioxygenase OS=Arabidopsis thaliana (sp|q949r4|dioxl_arath : 82.8)'
Vitvi00g01289	253.801	0.107937	0.20613	0.523638	0.600531	0.712868	253.801	0.0193912	0.189286	0.102444	0.918405	0.944104	253.801	-0.196961	0.181912	-1.08272	0.278931	0.387116	253.801	0.21311	0.191602	1.11225	0.266029	0.367528	VIT_00s2226g00010	AT2G22530.1	1.1e-28	125.9	1-to-1	NA	AT2G22530.1	Alkaline-phosphatase-like family protein	NA	NA	NA	NA	Alkaline-phosphatase-like family protein%3B FUNCTIONS IN: transferase activity%2C catalytic activity%3B INVOLVED IN: metabolic process%2C phospholipid biosynthetic process%3B LOCATED IN: endomembrane system%3B EXPRESSED IN: 21 plant structures%3B EXPRESSED DURING: 8 growth stages%3B CONTAINS InterPro DOMAIN/s: Alkaline phosphatase-like%2C alpha/beta/alpha (InterPro:IPR017849)%2C Type I phosphodie…	***	gene:2041247.UniProt:F4IJJ8	NA	'35.2'	'not assigned.not annotated'	' no hits & (original description: none)'
Vitvi00g01295	0	NA	NA	NA	NA	NA	0	NA	NA	NA	NA	NA	0	NA	NA	NA	NA	NA	0	NA	NA	NA	NA	NA		NA	NA	NA	NA	NA	NA	NA	NA	NA	NA	NA	NA	NA	NA	NA	'35.2'	'not assigned.not annotated'	' no hits & (original description: none)'
Vitvi00g01296	0	NA	NA	NA	NA	NA	0	NA	NA	NA	NA	NA	0	NA	NA	NA	NA	NA	0	NA	NA	NA	NA	NA		AT5G01960.1	1.6e-30	130.2	1-to-1	NA	AT5G01960.1	RING/U-box superfamily protein	NA	NA	NA	NA	RING/U-box superfamily protein%3B FUNCTIONS IN: zinc ion binding%3B LOCATED IN: chloroplast%3B EXPRESSED IN: 23 plant structures%3B EXPRESSED DURING: 14 growth stages%3B CONTAINS InterPro DOMAIN/s: Zinc finger%2C RING-type%2C conserved site (InterPro:IPR017907)%2C Zinc finger%2C RING-type (InterPro:IPR001841)%2C Zinc finger%2C C3HC4 RING-type (InterPro:IPR018957)%3B BEST Arabidopsis thaliana prot…	****	gene:2185087.UniProt:Q8L610	NA	'35.2'	'not assigned.not annotated'	' no hits & (original description: none)'
Vitvi00g01298	18.5404	-1.66112	0.79276	-2.09536	0.0361386	0.0821235	18.5404	-0.643156	0.653811	-0.983703	0.325261	0.432837	18.5404	-0.558568	0.640977	-0.871433	0.383518	0.497034	18.5404	-0.793095	0.637291	-1.24448	0.213324	0.307685		AT2G22530.1	2.8e-16	85.5	1-to-1	NA	AT2G22530.1	Alkaline-phosphatase-like family protein	NA	NA	NA	NA	Alkaline-phosphatase-like family protein%3B FUNCTIONS IN: transferase activity%2C catalytic activity%3B INVOLVED IN: metabolic process%2C phospholipid biosynthetic process%3B LOCATED IN: endomembrane system%3B EXPRESSED IN: 21 plant structures%3B EXPRESSED DURING: 8 growth stages%3B CONTAINS InterPro DOMAIN/s: Alkaline phosphatase-like%2C alpha/beta/alpha (InterPro:IPR017849)%2C Type I phosphodie…	***	gene:2041247.UniProt:F4IJJ8	NA	'35.2'	'not assigned.not annotated'	' no hits & (original description: none)'
Vitvi00g01299	0	NA	NA	NA	NA	NA	0	NA	NA	NA	NA	NA	0	NA	NA	NA	NA	NA	0	NA	NA	NA	NA	NA		NA	NA	NA	NA	NA	NA	NA	NA	NA	NA	NA	NA	NA	NA	NA	'35.2'	'not assigned.not annotated'	' no hits & (original description: none)'
Vitvi00g01302	143.402	-1.20826	0.760601	-1.58856	0.112159	0.202338	143.402	0.242997	0.671171	0.362049	0.717315	0.789989	143.402	-0.249507	0.673517	-0.370454	0.711044	0.789713	143.402	-0.132099	0.669041	-0.197445	0.843479	0.890129		AT1G11380.1	5.8e-12	69.3	1-to-1	NA	AT1G11380.1	PLAC8 family protein	NA	NA	NA	NA	PLAC8 family protein%3B CONTAINS InterPro DOMAIN/s: Protein of unknown function Cys-rich (InterPro:IPR006461)%3B BEST Arabidopsis thaliana protein match is: PLAC8 family protein (TAIR:AT5G05350.1)%3B Has 314 Blast hits to 313 proteins in 28 species: Archae - 0%3B Bacteria - 0%3B Metazoa - 13%3B Fungi - 8%3B Plants - 293%3B Viruses - 0%3B Other Eukaryotes - 0 (source: NCBI BLink).	****	gene:2200080.UniProt:Q8LFV5	NA	'35.2'	'not assigned.not annotated'	' no hits & (original description: none)'
Vitvi00g01303	0	NA	NA	NA	NA	NA	0	NA	NA	NA	NA	NA	0	NA	NA	NA	NA	NA	0	NA	NA	NA	NA	NA		NA	NA	NA	NA	NA	NA	NA	NA	NA	NA	NA	NA	NA	NA	NA	'35.2'	'not assigned.not annotated'	' no hits & (original description: none)'
Vitvi00g01304	0.0346053	0	6.58482	0	1	NA	0.0346053	0	5.88922	0	1	NA	0.0346053	1.38641	5.88968	0.235397	0.813901	NA	0.0346053	0	5.88968	0	1	NA		NA	NA	NA	NA	NA	NA	NA	NA	NA	NA	NA	NA	NA	NA	NA	'35.2'	'not assigned.not annotated'	' no hits & (original description: none)'
Vitvi00g01305	0	NA	NA	NA	NA	NA	0	NA	NA	NA	NA	NA	0	NA	NA	NA	NA	NA	0	NA	NA	NA	NA	NA		NA	NA	NA	NA	NA	NA	NA	NA	NA	NA	NA	NA	NA	NA	NA	'35.2'	'not assigned.not annotated'	' no hits & (original description: none)'
Vitvi00g01306	4.89426	-1.43424	1.07686	-1.33188	0.1829	0.295061	4.89426	1.52093	0.904281	1.68193	0.0925833	0.157076	4.89426	-1.25383	0.863079	-1.45274	0.146296	0.230022	4.89426	-0.78361	0.942855	-0.831103	0.405915	0.514054	VIT_00s2287g00010	AT3G50380.1	3.8e-16	83.6	1-to-many	AT3G50380.2.AT3G50380.3.AT3G50380.4	AT3G50380.1	vacuolar protein sorting-associated protein%2C putative (DUF1162)	NA	NA	NA	NA	INVOLVED IN: protein localization%3B LOCATED IN: mitochondrion%3B EXPRESSED IN: 22 plant structures%3B EXPRESSED DURING: 13 growth stages%3B CONTAINS InterPro DOMAIN/s: Vacuolar protein sorting-associated protein (InterPro:IPR009543)%3B Has 365 Blast hits to 355 proteins in 118 species: Archae - 0%3B Bacteria - 0%3B Metazoa - 156%3B Fungi - 111%3B Plants - 61%3B Viruses - 0%3B Other Eukaryotes - …	**	gene:2074809.UniProt:F4J0L9	NA	'35.2'	'not assigned.not annotated'	' no hits & (original description: none)'
Vitvi00g01307	0	NA	NA	NA	NA	NA	0	NA	NA	NA	NA	NA	0	NA	NA	NA	NA	NA	0	NA	NA	NA	NA	NA		AT4G23160.2	2e-22	102.8	1-to-many	AT4G23160.3	AT4G23160.2	cysteine-rich RECEPTOR-like kinase	NA	"CRK8"	NA	cysteine-rich RLK (RECEPTOR-like protein kinase) 8	NA	NA	NA	NA	'35.1'	'not assigned.annotated'	'Retrovirus-related Pol polyprotein from transposon RE1 OS=Arabidopsis thaliana (sp|q94hw2|polr1_arath : 94.4)'
Vitvi00g01309	22.993	3.4307	1.09734	3.12639	0.00176964	0.00680278	22.993	7.81755	1.50009	5.2114	1.87426e-07	1.34116e-06	22.993	4.9806	1.13783	4.37728	1.20171e-05	5.50938e-05	22.993	2.27093	0.97102	2.3387	0.019351	0.0410371	VIT_00s2304g00010	AT3G49170.1	2.3e-250	863.2	1-to-1	NA	AT3G49170.1	Tetratricopeptide repeat (TPR)-like superfamily protein	NA	"EMB2261"	NA	embryo defective 2261	embryo defective 2261 (EMB2261)%3B INVOLVED IN: embryo development ending in seed dormancy%3B LOCATED IN: chloroplast%3B CONTAINS InterPro DOMAIN/s: Pentatricopeptide repeat (InterPro:IPR002885)%3B BEST Arabidopsis thaliana protein match is: Tetratricopeptide repeat (TPR)-like superfamily protein (TAIR:AT3G57430.1)%3B Has 48732 Blast hits to 14187 proteins in 273 species: Archae - 0%3B Bacteria -…	*****	PMID:15647901.gene:2082885.UniProt:Q5G1T1	NA	'16.10.3.4.19'	'RNA processing.organelle machineries.RNA editing.plastidial RNA editing.ECD1 RNA editing factor'	'RNA processing.organelle machineries.RNA editing.plastidial RNA editing.ECD1 RNA editing factor (original description: none)'
Vitvi00g01311	0	NA	NA	NA	NA	NA	0	NA	NA	NA	NA	NA	0	NA	NA	NA	NA	NA	0	NA	NA	NA	NA	NA		AT3G03910.1	1.1e-15	83.6	1-to-many	AT3G03910.2.AT5G18170.1	AT3G03910.1	glutamate dehydrogenase 3	GDH3 encodes a member of the glutamate dehydrogenease family. Its expression is upregulated in response to cytokinin and it may play a role in the control of nitrogen metabolism in leaf development.	"GDH3"	NA	glutamate dehydrogenase 3	glutamate dehydrogenase 3 (GDH3)%3B FUNCTIONS IN: oxidoreductase activity%2C acting on the CH-NH2 group of donors%2C NAD or NADP as acceptor%2C oxidoreductase activity%2C binding%2C catalytic activity%3B INVOLVED IN: regulation of nitrogen compound metabolic process%3B LOCATED IN: mitochondrion%3B EXPRESSED IN: 19 plant structures%3B EXPRESSED DURING: 8 growth stages%3B CONTAINS InterPro DOMAIN/s…	****	PMID:14671022.PMID:19048287.gene:3698693.UniProt:Q9S7A0	NA	'25.1.6.1'	'Nutrient uptake.nitrogen assimilation.glutamate deamination.glutamate dehydrogenase'	'Nutrient uptake.nitrogen assimilation.glutamate deamination.glutamate dehydrogenase (original description: none)'
Vitvi00g01312	21.5367	8.55598	1.24816	6.85487	7.13766e-12	1.46654e-10	21.5367	6.79099	1.23327	5.50647	3.66091e-08	2.98688e-07	21.5367	8.40194	1.23164	6.82173	8.99496e-12	1.12415e-10	21.5367	7.61057	1.23274	6.17371	6.67049e-10	6.86754e-09	VIT_00s2313g00010	AT1G17130.1	3.2e-31	134.8	1-to-many	AT1G17130.2	AT1G17130.1	coiled-coil protein (DUF572)	NA	NA	NA	NA	Family of unknown function (DUF572) %3B CONTAINS InterPro DOMAIN/s: Protein of unknown function DUF572 (InterPro:IPR007590)%3B BEST Arabidopsis thaliana protein match is: Family of unknown function (DUF572) (TAIR:AT2G32050.1)%3B Has 1377 Blast hits to 1314 proteins in 254 species: Archae - 0%3B Bacteria - 51%3B Metazoa - 442%3B Fungi - 351%3B Plants - 150%3B Viruses - 5%3B Other Eukaryotes - 378 …	****	gene:2020366.UniProt:Q9SHH1	NA	'35.2'	'not assigned.not annotated'	' no hits & (original description: none)'
Vitvi00g01314	0	NA	NA	NA	NA	NA	0	NA	NA	NA	NA	NA	0	NA	NA	NA	NA	NA	0	NA	NA	NA	NA	NA		NA	NA	NA	NA	NA	NA	NA	NA	NA	NA	NA	NA	NA	NA	NA	'35.2'	'not assigned.not annotated'	' no hits & (original description: none)'
Vitvi00g01316	76.1729	0.127493	0.274496	0.464463	0.642316	0.747079	76.1729	0.530302	0.256036	2.0712	0.0383405	0.0750226	76.1729	-0.611726	0.250219	-2.44476	0.0144948	0.0322435	76.1729	-0.930199	0.254303	-3.65784	0.000254348	0.000897444		AT3G07360.1	2.7e-27	119	1-to-many	AT3G07360.10.AT3G07360.2.AT3G07360.3.AT3G07360.4.AT3G07360.5.AT3G07360.6.AT3G07360.7.AT3G07360.8.AT3G07360.9	AT3G07360.1	plant U-box 9	Encodes a protein containing a U-box and an ARM domain. This protein has E3 ubiquitin ligase activity based on in vitro assays.	"PUB9"	ATPUB9.ARABIDOPSIS THALIANA PLANT U-BOX 9	plant U-box 9	plant U-box 9 (PUB9)%3B FUNCTIONS IN: ubiquitin-protein ligase activity%3B INVOLVED IN: protein ubiquitination%3B LOCATED IN: nucleus%3B EXPRESSED IN: 23 plant structures%3B EXPRESSED DURING: 13 growth stages%3B CONTAINS InterPro DOMAIN/s: U box domain (InterPro:IPR003613)%2C Armadillo-like helical (InterPro:IPR011989)%2C Armadillo-type fold (InterPro:IPR016024)%3B BEST Arabidopsis thaliana prote…	****	gene:2079705.UniProt:Q9SRT0	NA	'35.1'	'not assigned.annotated'	'U-box domain-containing protein 9 OS=Arabidopsis thaliana (sp|q9srt0|pub9_arath : 121.0)'
Vitvi00g01319	818.579	0.196666	0.476744	0.412519	0.679959	0.776555	818.579	-0.439751	0.426564	-1.03091	0.302581	0.408884	818.579	-0.748323	0.426258	-1.75556	0.0791629	0.138141	818.579	-0.254063	0.426895	-0.595142	0.551749	0.651348	VIT_00s2349g00010	AT2G22500.1	2.8e-134	476.9	1-to-1	NA	AT2G22500.1	uncoupling protein 5	Encodes one of the mitochondrial dicarboxylate carriers (DIC): DIC1 (AT2G22500)%2C DIC2 (AT4G24570)%2C DIC3 (AT5G09470).	"UCP5"	ATPUMP5.PLANT UNCOUPLING MITOCHONDRIAL PROTEIN 5.DIC1.DICARBOXYLATE CARRIER 1	uncoupling protein 5	uncoupling protein 5 (UCP5)%3B FUNCTIONS IN: binding%2C dicarboxylic acid transmembrane transporter activity%3B INVOLVED IN: transport%2C mitochondrial transport%3B LOCATED IN: mitochondrion%2C mitochondrial inner membrane%2C membrane%3B EXPRESSED IN: 23 plant structures%3B EXPRESSED DURING: 15 growth stages%3B CONTAINS InterPro DOMAIN/s: Mitochondrial substrate carrier (InterPro:IPR001993)%2C Mi…	*****	gene:2041182.UniProt:Q9SJY5	NA	'24.2.13'	'Solute transport.carrier-mediated transport.MC-type solute transporter'	'Solute transport.carrier-mediated transport.MC-type solute transporter (original description: none)'
Vitvi00g01320	397.727	0.913102	0.158351	5.76633	8.10177e-09	1.05894e-07	397.727	0.808508	0.139038	5.81501	6.06303e-09	5.66574e-08	397.727	0.562848	0.140903	3.99458	6.48091e-05	0.000256022	397.727	-0.55899	0.134755	-4.14821	3.35085e-05	0.000144028	VIT_00s2364g00010	AT4G21350.1	7.1e-124	442.2	1-to-1	NA	AT4G21350.1	plant U-box 8	Encodes a U-box/ARM repeat protein required fore self-incompatibility.	"PUB8"	B80	plant U-box 8	plant U-box 8 (PUB8)%3B FUNCTIONS IN: ubiquitin-protein ligase activity%2C binding%2C zinc ion binding%3B INVOLVED IN: protein ubiquitination%3B LOCATED IN: ubiquitin ligase complex%3B EXPRESSED IN: 23 plant structures%3B EXPRESSED DURING: 13 growth stages%3B CONTAINS InterPro DOMAIN/s: Zinc finger%2C RING-type (InterPro:IPR001841)%2C U box domain (InterPro:IPR003613)%2C Armadillo-like helical (I…	*****	gene:2141225.UniProt:O81902	NA	'35.1'	'not assigned.annotated'	'U-box domain-containing protein 8 OS=Arabidopsis thaliana (sp|o81902|pub8_arath : 405.0)'
Vitvi00g01321	0.0954927	0	6.58482	0	1	NA	0.0954927	-0.846936	5.88922	-0.143811	0.885649	NA	0.0954927	0	5.88968	0	1	NA	0.0954927	-1.08752	5.88968	-0.184648	0.853505	NA		NA	NA	NA	NA	NA	NA	NA	NA	NA	NA	NA	NA	NA	NA	NA	'35.2'	'not assigned.not annotated'	' no hits & (original description: none)'
Vitvi00g01322	0	NA	NA	NA	NA	NA	0	NA	NA	NA	NA	NA	0	NA	NA	NA	NA	NA	0	NA	NA	NA	NA	NA		NA	NA	NA	NA	NA	NA	NA	NA	NA	NA	NA	NA	NA	NA	NA	'35.2'	'not assigned.not annotated'	' no hits & (original description: none)'
Vitvi00g01323	0	NA	NA	NA	NA	NA	0	NA	NA	NA	NA	NA	0	NA	NA	NA	NA	NA	0	NA	NA	NA	NA	NA		NA	NA	NA	NA	NA	NA	NA	NA	NA	NA	NA	NA	NA	NA	NA	'35.2'	'not assigned.not annotated'	' no hits & (original description: none)'
Vitvi00g01324	95.6822	-0.993258	0.201331	-4.93345	8.07888e-07	7.35421e-06	95.6822	-0.48205	0.167723	-2.87409	0.00405193	0.0108961	95.6822	-0.140898	0.168116	-0.838098	0.401976	0.515363	95.6822	0.0988333	0.17203	0.574511	0.565622	0.663706		AT2G22475.1	1.2e-41	167.2	1-to-many	AT2G22475.2	AT2G22475.1	GRAM domain family protein	Encodes GL2-expression modulator (GEM). Involved in the spatial control of cell division%2C patterning and differentiation of Arabidopsis root epidermal cells. GEM interacts with CDT1%2C a DNA replication protein and TTG1 (TRANSPARENT TESTA GLABRA1)%2C a WD40-repeat protein involved in GL2-dependent cell fate decision. GEM seems to participate in the maintenance of a repressor histone H3 epigenet…	"GEM"	NA	GL2-EXPRESSION MODULATOR	GL2-EXPRESSION MODULATOR (GEM)%3B CONTAINS InterPro DOMAIN/s: GRAM (InterPro:IPR004182)%3B BEST Arabidopsis thaliana protein match is: GRAM domain family protein (TAIR:AT4G40100.1)%3B Has 360 Blast hits to 359 proteins in 24 species: Archae - 0%3B Bacteria - 0%3B Metazoa - 1%3B Fungi - 0%3B Plants - 359%3B Viruses - 0%3B Other Eukaryotes - 0 (source: NCBI BLink).	****	gene:3694139.UniProt:Q8S8F8	NA	'35.1'	'not assigned.annotated'	'GLABRA2 expression modulator OS=Arabidopsis thaliana (sp|q8s8f8|gem_arath : 165.0)'
Vitvi00g01325	0	NA	NA	NA	NA	NA	0	NA	NA	NA	NA	NA	0	NA	NA	NA	NA	NA	0	NA	NA	NA	NA	NA		NA	NA	NA	NA	NA	NA	NA	NA	NA	NA	NA	NA	NA	NA	NA	'35.2'	'not assigned.not annotated'	' no hits & (original description: none)'
Vitvi00g01326	333.699	0.464419	0.312839	1.48453	0.137669	0.236766	333.699	1.18879	0.27766	4.28147	1.85663e-05	8.97094e-05	333.699	1.41659	0.277323	5.10808	3.2545e-07	2.01252e-06	333.699	1.24669	0.278398	4.47809	7.53135e-06	3.74158e-05	VIT_00s2376g00010	AT4G05020.1	3.8e-33	141.4	1-to-many	AT4G05020.2	AT4G05020.1	NAD(P)H dehydrogenase B2	NA	"NDB2"	NA	NAD(P)H dehydrogenase B2	NAD(P)H dehydrogenase B2 (NDB2)%3B FUNCTIONS IN: disulfide oxidoreductase activity%2C oxidoreductase activity%2C FAD binding%3B INVOLVED IN: oxidation reduction%3B LOCATED IN: mitochondrion%2C extrinsic to mitochondrial inner membrane%3B EXPRESSED IN: 26 plant structures%3B EXPRESSED DURING: 15 growth stages%3B CONTAINS InterPro DOMAIN/s: FAD-dependent pyridine nucleotide-disulphide oxidoreductas…	****	PMID:14671022.PMID:17673460.PMID:18567827.gene:3439800.UniProt:Q94BV7	NA	'35.1'	'not assigned.annotated'	'External alternative NAD(P)H-ubiquinone oxidoreductase B2. mitochondrial OS=Arabidopsis thaliana (sp|q94bv7|ndb2_arath : 129.0)'
Vitvi00g01327	9.69387	-1.70284	0.840131	-2.02687	0.0426757	0.093978	9.69387	-0.91693	0.700835	-1.30834	0.190758	0.282969	9.69387	-2.1284	0.678101	-3.13876	0.00169664	0.00483616	9.69387	-2.27784	0.720572	-3.16116	0.00157145	0.0045418	VIT_00s2377g00010	AT2G04039.1	8e-26	116.7	1-to-many	AT2G04039.2	AT2G04039.1	DUF2996 family protein	NA	NA	NA	NA	unknown protein%3B FUNCTIONS IN: molecular_function unknown%3B LOCATED IN: chloroplast%3B EXPRESSED IN: 21 plant structures%3B EXPRESSED DURING: 13 growth stages%3B CONTAINS InterPro DOMAIN/s: Protein of unknown function DUF2996 (InterPro:IPR021374)%3B Has 159 Blast hits to 159 proteins in 52 species: Archae - 0%3B Bacteria - 76%3B Metazoa - 0%3B Fungi - 0%3B Plants - 38%3B Viruses - 0%3B Other E…	****	PMID:15028209.PMID:18431481.gene:2827470.UniProt:Q93Z84	NA	'1.1.8.1.5.4'	'Photosynthesis.photophosphorylation.chlororespiration.NADH dehydrogenase-like (NDH) complex.electron donor-binding subcomplex E.NdhV component'	'Photosynthesis.photophosphorylation.chlororespiration.NADH dehydrogenase-like (NDH) complex.electron donor-binding subcomplex E.NdhV component (original description: none)'
Vitvi00g01329	125.525	-0.0530274	0.50314	-0.105393	0.916064	0.948253	125.525	0.437282	0.452737	0.965862	0.334113	0.441413	125.525	-1.90051	0.444721	-4.2735	1.92432e-05	8.50564e-05	125.525	-1.78335	0.458272	-3.89146	9.96447e-05	0.000386966	VIT_00s2380g00010	AT1G11330.1	1.9e-80	298.9	1-to-1	NA	AT1G11330.1	S-locus lectin protein kinase family protein	NA	NA	NA	NA	S-locus lectin protein kinase family protein%3B FUNCTIONS IN: in 6 functions%3B INVOLVED IN: protein amino acid phosphorylation%2C recognition of pollen%3B LOCATED IN: plasma membrane%3B EXPRESSED IN: 23 plant structures%3B EXPRESSED DURING: 13 growth stages%3B CONTAINS InterPro DOMAIN/s: Curculin-like (mannose-binding) lectin (InterPro:IPR001480)%2C PAN-2 domain (InterPro:IPR013227)%2C Apple-lik…	****	PMID:16618929.PMID:17317660.PMID:17644812.PMID:21075962.gene:2202053.UniProt:F4I8U6	NA	'50.2.7'	'Enzyme classification.EC_2 transferases.EC_2.7 transferase transferring phosphorus-containing group'	'G-type lectin S-receptor-like serine/threonine-protein kinase At1g11330 OS=Arabidopsis thaliana (sp|q9sxb8|y1133_arath : 259.0) & Enzyme classification.EC_2 transferases.EC_2.7 transferase transferring phosphorus-containing group(50.2.7 : 76.1) (original description: none)'
Vitvi00g01332	1939.88	0.21159	0.147895	1.43068	0.152523	0.256302	1939.88	0.226055	0.132625	1.70447	0.0882933	0.151132	1939.88	-0.205123	0.132181	-1.55183	0.120702	0.196259	1939.88	-0.456106	0.13276	-3.43556	0.000591328	0.00190379		AT4G17570.2	3.2e-32	138.7	1-to-many	AT4G17570.3	AT4G17570.2	GATA transcription factor 26	Encodes a member of the GATA factor family of zinc finger transcription factors.	"GATA26"	NA	GATA transcription factor 26	GATA transcription factor 26 (GATA26)%3B FUNCTIONS IN: sequence-specific DNA binding transcription factor activity%3B INVOLVED IN: regulation of transcription%2C DNA-dependent%3B EXPRESSED IN: 21 plant structures%3B EXPRESSED DURING: 13 growth stages%3B CONTAINS InterPro DOMAIN/s: Zinc finger%2C GATA-type (InterPro:IPR000679)%3B BEST Arabidopsis thaliana protein match is: GATA transcription facto…	**	gene:6530297435.UniProt:F4JP80	NA	'15.7.1.3'	'RNA biosynthesis.transcriptional activation.C2C2 superfamily.GATA transcription factor'	'RNA biosynthesis.transcriptional activation.C2C2 superfamily.GATA transcription factor (original description: none)'
Vitvi00g01333	314.003	-2.48491	0.278277	-8.92963	4.27428e-19	2.0299e-17	314.003	-1.79895	0.238003	-7.5585	4.07745e-14	7.89598e-13	314.003	-2.48504	0.240766	-10.3214	5.63982e-25	2.45596e-23	314.003	-2.21899	0.241842	-9.17536	4.5006e-20	1.64624e-18	VIT_00s2397g00010	AT3G49170.1	9.3999999999999e-311	1063.9	1-to-1	NA	AT3G49170.1	Tetratricopeptide repeat (TPR)-like superfamily protein	NA	"EMB2261"	NA	embryo defective 2261	embryo defective 2261 (EMB2261)%3B INVOLVED IN: embryo development ending in seed dormancy%3B LOCATED IN: chloroplast%3B CONTAINS InterPro DOMAIN/s: Pentatricopeptide repeat (InterPro:IPR002885)%3B BEST Arabidopsis thaliana protein match is: Tetratricopeptide repeat (TPR)-like superfamily protein (TAIR:AT3G57430.1)%3B Has 48732 Blast hits to 14187 proteins in 273 species: Archae - 0%3B Bacteria -…	*****	PMID:15647901.gene:2082885.UniProt:Q5G1T1	NA	'16.10.3.4.19'	'RNA processing.organelle machineries.RNA editing.plastidial RNA editing.ECD1 RNA editing factor'	'RNA processing.organelle machineries.RNA editing.plastidial RNA editing.ECD1 RNA editing factor (original description: none)'
Vitvi00g01334	1.22635	5.14168	3.97952	1.29204	0.196344	0.311411	1.22635	2.71914	3.65246	0.744467	0.456594	0.561829	1.22635	3.97905	3.6104	1.10211	0.270414	0.377828	1.22635	3.79732	3.60011	1.05478	0.291527	0.394967	GSVIVT00008179001	AT4G17420.1	5.2e-32	135.6	1-to-many	AT4G17420.2.AT4G17420.3	AT4G17420.1	Tryptophan RNA-binding attenuator protein-like protein	NA	NA	NA	NA	Tryptophan RNA-binding attenuator protein-like%3B CONTAINS InterPro DOMAIN/s: Protein of unknown function DUF124 (InterPro:IPR002838)%2C Tryptophan RNA-binding attenuator protein-like (InterPro:IPR016031)%3B BEST Arabidopsis thaliana protein match is: Tryptophan RNA-binding attenuator protein-like (TAIR:AT5G47420.1)%3B Has 30201 Blast hits to 17322 proteins in 780 species: Archae - 12%3B Bacteria…	****	gene:2129015.UniProt:Q84J77	NA	'35.2'	'not assigned.not annotated'	' no hits & (original description: none)'
Vitvi00g01338	115.523	-0.647658	0.26134	-2.47822	0.0132041	0.0361225	115.523	-1.14759	0.24587	-4.66749	3.04902e-06	1.74211e-05	115.523	-1.45529	0.238286	-6.10733	1.01313e-09	9.36028e-09	115.523	-1.71583	0.242293	-7.08162	1.42476e-12	2.18709e-11	VIT_00s2430g00010	AT5G47490.1	2.3e-27	122.5	1-to-many	AT5G47490.2.AT5G47490.3	AT5G47490.1	RGPR-like protein	NA	NA	NA	NA	RGPR-related%3B INVOLVED IN: biological_process unknown%3B LOCATED IN: cellular_component unknown%3B EXPRESSED IN: 22 plant structures%3B EXPRESSED DURING: 11 growth stages%3B BEST Arabidopsis thaliana protein match is: RGPR-related (TAIR:AT5G47480.1)%3B Has 1807 Blast hits to 1807 proteins in 277 species: Archae - 0%3B Bacteria - 0%3B Metazoa - 736%3B Fungi - 347%3B Plants - 385%3B Viruses - 0%3…	****	gene:2169007.UniProt:Q9FGK8	NA	'22.4.4'	'Vesicle trafficking.Coat protein II (COPII) coatomer machinery.Sec16 Sar1-GTPase-regulating protein'	'Vesicle trafficking.Coat protein II (COPII) coatomer machinery.Sec16 Sar1-GTPase-regulating protein (original description: none)'
Vitvi00g01341	89.0976	0.115647	0.221161	0.522909	0.601037	0.713313	89.0976	0.341794	0.192381	1.77665	0.0756266	0.132915	89.0976	0.359693	0.189871	1.89441	0.058171	0.106495	89.0976	-0.258108	0.202926	-1.27193	0.203398	0.296014		NA	NA	NA	NA	NA	NA	NA	NA	NA	NA	NA	NA	NA	NA	NA	'35.2'	'not assigned.not annotated'	' no hits & (original description: none)'
Vitvi00g01342	1.03794	4.92055	3.49973	1.40598	0.159731	NA	1.03794	2.5693	3.24019	0.792947	0.427808	0.534374	1.03794	3.5385	3.20016	1.10572	0.268846	0.376069	1.03794	-1.25368	3.1351	-0.399884	0.689242	0.767936	VIT_00s2438g00010	AT5G40820.1	1.5e-45	181.8	1-to-many	AT5G40820.2.AT5G40820.3.AT5G40820.4	AT5G40820.1	Ataxia telangiectasia-mutated and RAD3-like protein	Encodes a Arabidopsis ortholog of the ATR protein kinase that is involved in a wide range of responses to DNA damage and plays a central role in cell-cycle regulation. Dominant loss of function alleles identified as suppressors of ALS also exhibit increased tolerance to aluminum. This may be due to the inhibition of terminal differentiation of the root apex upon exposure to Al.	"ATR"	ATATR.ARABIDOPSIS THALIANA ATAXIA TELANGIECTASIA-MUTATED AND RAD3-RELATED.ATRAD3	Ataxia telangiectasia-mutated and RAD3-related	Ataxia telangiectasia-mutated and RAD3-related (ATR)%3B FUNCTIONS IN: protein serine/threonine kinase activity%2C inositol or phosphatidylinositol kinase activity%2C binding%2C phosphotransferase activity%2C alcohol group as acceptor%3B INVOLVED IN: in 9 processes%3B EXPRESSED IN: 10 plant structures%3B EXPRESSED DURING: 6 growth stages%3B CONTAINS InterPro DOMAIN/s: Phosphatidylinositol 3-/4-kin…	*****	PMID:10611295.PMID:15276459.PMID:17227549.PMID:17209125.PMID:17487278.PMID:18435824.PMID:18528439.gene:2164480.UniProt:Q9FKS4	NA	'35.1'	'not assigned.annotated'	'Serine/threonine-protein kinase ATR OS=Arabidopsis thaliana (sp|q9fks4|atr_arath : 162.0)'
Vitvi00g01343	0.563103	3.50141	6.49671	0.538952	0.58992	NA	0.563103	3.46365	5.80298	0.596875	0.550591	NA	0.563103	0	5.88968	0	1	NA	0.563103	2.49464	5.82439	0.42831	0.668425	NA	VIT_00s2438g00020	AT1G27770.1	3.4e-20	95.1	1-to-many	AT1G27770.2.AT1G27770.3.AT1G27770.4	AT1G27770.1	autoinhibited Ca2+-ATPase 1	Encodes a chloroplast envelope Ca2+-ATPase with an N-terminal autoinhibitor.	"ACA1"	PEA1.PLASTID ENVELOPE ATPASE 1	autoinhibited Ca2+-ATPase 1	autoinhibited Ca2+-ATPase 1 (ACA1)%3B FUNCTIONS IN: calcium channel activity%2C calcium-transporting ATPase activity%2C calmodulin binding%3B INVOLVED IN: cation transport%2C calcium ion transport%2C metabolic process%2C ATP biosynthetic process%3B LOCATED IN: endoplasmic reticulum%2C plasma membrane%2C chloroplast inner membrane%3B EXPRESSED IN: 24 plant structures%3B EXPRESSED DURING: 13 growth…	*****	PMID:11782485.PMID:16618929.PMID:17317660.gene:3433790.UniProt:Q37145	NA	'35.1'	'not assigned.annotated'	'Calcium-transporting ATPase 10. plasma membrane-type OS=Oryza sativa subsp. japonica (sp|q2qmx9|aca10_orysj : 99.8)'
Vitvi00g01344	39.9715	0.351767	0.677791	0.518991	0.603767	0.715284	39.9715	0.248853	0.616781	0.40347	0.686603	0.765213	39.9715	-0.36272	0.60033	-0.604201	0.54571	0.650843	39.9715	0.137572	0.629895	0.218405	0.827114	0.877777		AT3G50380.1	1.6e-14	80.1	1-to-many	AT3G50380.2.AT3G50380.3.AT3G50380.4	AT3G50380.1	vacuolar protein sorting-associated protein%2C putative (DUF1162)	NA	NA	NA	NA	INVOLVED IN: protein localization%3B LOCATED IN: mitochondrion%3B EXPRESSED IN: 22 plant structures%3B EXPRESSED DURING: 13 growth stages%3B CONTAINS InterPro DOMAIN/s: Vacuolar protein sorting-associated protein (InterPro:IPR009543)%3B Has 365 Blast hits to 355 proteins in 118 species: Archae - 0%3B Bacteria - 0%3B Metazoa - 156%3B Fungi - 111%3B Plants - 61%3B Viruses - 0%3B Other Eukaryotes - …	**	gene:2074809.UniProt:F4J0L9	NA	'35.2'	'not assigned.not annotated'	' no hits & (original description: none)'
Vitvi00g01352	0.0652789	-0.176311	6.58027	-0.0267939	0.978624	NA	0.0652789	0	5.88922	0	1	NA	0.0652789	-0.537148	5.88968	-0.0912017	0.927332	NA	0.0652789	0	5.88968	0	1	NA		AT5G19330.1	3.8e-08	56.6	1-to-1	NA	AT5G19330.1	ARM repeat protein interacting with ABF2	Encodes an armadillo repeat protein involved in the abscisic acid response. The protein interacts with a transcription factor%2C ABF2%2C which controls ABA-dependent gene expression via the G-box-type ABA-responsive elements.	"ARIA"	NA	ARM repeat protein interacting with ABF2	ARM repeat protein interacting with ABF2 (ARIA)%3B FUNCTIONS IN: protein binding%3B INVOLVED IN: response to salt stress%2C negative regulation of seed germination%2C response to abscisic acid stimulus%3B LOCATED IN: nucleus%2C plasma membrane%3B EXPRESSED IN: 26 plant structures%3B EXPRESSED DURING: 15 growth stages%3B CONTAINS InterPro DOMAIN/s: BTB/POZ (InterPro:IPR013069)%2C Armadillo-like he…	****	PMID:17317660.gene:2150294.UniProt:B9DHT4	NA	'35.2'	'not assigned.not annotated'	' no hits & (original description: none)'
Vitvi00g01353	0	NA	NA	NA	NA	NA	0	NA	NA	NA	NA	NA	0	NA	NA	NA	NA	NA	0	NA	NA	NA	NA	NA		NA	NA	NA	NA	NA	NA	NA	NA	NA	NA	NA	NA	NA	NA	NA	'35.2'	'not assigned.not annotated'	' no hits & (original description: none)'
Vitvi00g01354	6.62592	2.33304	1.59716	1.46074	0.144086	0.245211	6.62592	5.83327	1.79299	3.25338	0.00114041	0.0035755	6.62592	2.87611	1.4424	1.99398	0.0461545	0.0874215	6.62592	2.87096	1.51088	1.90018	0.0574089	0.104201	VIT_00s2478g00010	AT2G35035.1	3.3e-11	67.4	1-to-1	NA	AT2G35035.1	urease accessory protein D	Encodes a urease accessory protein which is essential for the activation of plant urease.	"URED"	NA	urease accessory protein D	urease accessory protein D (URED)%3B FUNCTIONS IN: nickel ion binding%3B INVOLVED IN: nitrogen compound metabolic process%2C positive regulation of metalloenzyme activity%3B LOCATED IN: cellular_component unknown%3B CONTAINS InterPro DOMAIN/s: Urease accessory protein UreD (InterPro:IPR002669)%3B Has 1808 Blast hits to 1807 proteins in 683 species: Archae - 18%3B Bacteria - 1466%3B Metazoa - 12%3…	*****	gene:504953904.UniProt:Q7Y0S0	NA	'35.2'	'not assigned.not annotated'	' no hits & (original description: none)'
Vitvi00g01355	452.703	-1.36926	0.2607	-5.25225	1.50255e-07	1.57386e-06	452.703	-1.87643	0.236901	-7.92075	2.36087e-15	5.26169e-14	452.703	-0.76228	0.23148	-3.29307	0.000991012	0.00298585	452.703	-0.967757	0.234195	-4.13228	3.59188e-05	0.000153519	VIT_00s2478g00020	AT1G70190.1	3e-48	190.7	1-to-many	AT1G70190.2	AT1G70190.1	ribosomal protein L7/L12 domain-containing protein	NA	NA	NA	NA	Ribosomal protein L7/L12%2C oligomerisation%3BRibosomal protein L7/L12%2C C-terminal/adaptor protein ClpS-like%3B FUNCTIONS IN: structural constituent of ribosome%3B INVOLVED IN: translation%3B LOCATED IN: mitochondrion%2C large ribosomal subunit%3B EXPRESSED IN: 22 plant structures%3B EXPRESSED DURING: 13 growth stages%3B CONTAINS InterPro DOMAIN/s: Ribosomal protein L12%2C chloroplast (InterPro…	*****	PMID:14671022.gene:2020677.UniProt:O04527	NA	'17.6.1.1.8'	'Protein biosynthesis.organelle translation machineries.mitochondrial ribosome.large subunit proteome.mtRPL7/L12 component'	'Protein biosynthesis.organelle translation machineries.mitochondrial ribosome.large subunit proteome.mtRPL7/L12 component (original description: none)'
Vitvi00g01359	0.109594	0	6.58482	0	1	NA	0.109594	2.11768	5.85301	0.36181	0.717494	NA	0.109594	0	5.88968	0	1	NA	0.109594	0	5.88968	0	1	NA		AT4G17050.1	5.3e-07	53.9	1-to-1	NA	AT4G17050.1	ureidoglycine aminohydrolase	Encodes a protein with ureidoglycine aminohydrolase activity.	"UGLYAH"	NA	ureidoglycine aminohydrolase	ureidoglycine aminohydrolase (UGLYAH)%3B FUNCTIONS IN: ureidoglycine aminohydrolase activity%2C sequence-specific DNA binding transcription factor activity%3B INVOLVED IN: allantoin catabolic process%2C regulation of transcription%3B LOCATED IN: endomembrane system%3B CONTAINS InterPro DOMAIN/s: Cupin 2%2C conserved barrel (InterPro:IPR013096)%2C Cupin%2C RmlC-type (InterPro:IPR011051)%2C RmlC-li…	****	PMID:11118137.gene:2130458.UniProt:Q8GXV5	NA	'35.2'	'not assigned.not annotated'	' no hits & (original description: none)'
Vitvi00g01360	28.5088	-0.227799	0.393575	-0.578794	0.562728	0.680385	28.5088	-0.311814	0.394231	-0.790943	0.428977	0.535404	28.5088	-0.160426	0.367064	-0.437051	0.662074	0.750167	28.5088	-0.204208	0.398714	-0.512165	0.608535	0.701114		AT4G20940.1	2.9e-10	61.6	1-to-1	NA	AT4G20940.1	Leucine-rich receptor-like protein kinase family protein	Encodes a plasma-membrane localized LRR receptor-like protein involved in both ABA and H202 mediated signaling involved in stomatal movement. TAIR10 annotation for this gene has a low confidence score (2-star). See Comments field for structural annotation by the community.	"GHR1"	NA	GUARD CELL HYDROGEN PEROXIDE-RESISTANT 1	Leucine-rich receptor-like protein kinase family protein%3B FUNCTIONS IN: protein serine/threonine kinase activity%2C protein kinase activity%2C ATP binding%3B INVOLVED IN: signal transduction%2C N-terminal protein myristoylation%3B LOCATED IN: plasma membrane%3B CONTAINS InterPro DOMAIN/s: Serine/threonine-protein kinase domain (InterPro:IPR002290)%2C Leucine-rich repeat-containing N-terminal do…	**	PMID:11751054.PMID:12912986.PMID:17317660.gene:2133048.UniProt:C0LGQ9	NA	'35.2'	'not assigned.not annotated'	' no hits & (original description: none)'
Vitvi00g01361	15.0246	5.72612	1.14112	5.01797	5.22209e-07	4.92849e-06	15.0246	7.39038	1.24886	5.91771	3.26448e-09	3.18567e-08	15.0246	7.54802	1.24992	6.03878	1.55283e-09	1.395e-08	15.0246	7.51649	1.24662	6.02948	1.64486e-09	1.59207e-08		AT1G32910.1	1.2e-24	110.5	1-to-1	NA	AT1G32910.1	HXXXD-type acyl-transferase family protein	NA	NA	NA	NA	HXXXD-type acyl-transferase family protein%3B FUNCTIONS IN: transferase activity%2C transferring acyl groups other than amino-acyl groups%2C transferase activity%3B INVOLVED IN: biological_process unknown%3B LOCATED IN: cellular_component unknown%3B CONTAINS InterPro DOMAIN/s: Transferase (InterPro:IPR003480)%3B BEST Arabidopsis thaliana protein match is: HXXXD-type acyl-transferase family protei…	***	gene:2037964.UniProt:Q9MAP9	NA	'35.2'	'not assigned.not annotated'	' no hits & (original description: none)'
Vitvi00g01362	0.312239	0	6.58482	0	1	NA	0.312239	-2.29593	5.83255	-0.393641	0.693846	NA	0.312239	0	5.88968	0	1	NA	0.312239	-2.74003	5.82434	-0.470445	0.638037	NA		AT4G26200.1	1.9e-17	87	1-to-1	NA	AT4G26200.1	1-amino-cyclopropane-1-carboxylate synthase 7	Member of a family of proteins in Arabidopsis that encode 1-Amino-cyclopropane-1-carboxylate synthase%2C an enzyme involved in ethylene biosynthesis. Not expressed in response to IAA.	"ACS7"	ACCS7.1-amino-cyclopropane-1-carboxylate synthase 7.ATACS7	1-amino-cyclopropane-1-carboxylate synthase 7	1-amino-cyclopropane-1-carboxylate synthase 7 (ACS7)%3B CONTAINS InterPro DOMAIN/s: 1-aminocyclopropane-1-carboxylate synthase (InterPro:IPR001176)%2C Pyridoxal phosphate-dependent transferase%2C major domain (InterPro:IPR015424)%2C Aminotransferase%2C class I/classII (InterPro:IPR004839)%2C Aminotransferases%2C class-I%2C pyridoxal-phosphate-binding site (InterPro:IPR004838)%2C Pyridoxal phospha…	****	PMID:12968022.gene:2136778.UniProt:Q9STR4	NA	'35.1'	'not assigned.annotated'	'1-aminocyclopropane-1-carboxylate synthase 7 OS=Arabidopsis thaliana (sp|q9str4|1a17_arath : 83.6)'
Vitvi00g01364	85.2544	0.600502	0.304426	1.97257	0.0485446	0.104303	85.2544	0.0475653	0.282058	0.168637	0.866082	0.905242	85.2544	0.182725	0.270391	0.67578	0.49918	0.608358	85.2544	-0.0472149	0.286315	-0.164906	0.869018	0.909842	VIT_00s2499g00010	NA	NA	NA	NA	NA	NA	NA	NA	NA	NA	NA	NA	NA	NA	NA	'35.2'	'not assigned.not annotated'	' no hits & (original description: none)'
Vitvi00g01366	1.51013	4.04401	2.84744	1.42023	0.155542	0.259951	1.51013	4.36131	2.59418	1.68119	0.092726	0.157272	1.51013	4.77799	2.59125	1.84389	0.0651985	0.117347	1.51013	2.19877	2.69936	0.814552	0.415329	0.522753	VIT_00s2505g00010	AT1G24706.1	4.9e-89	326.2	1-to-many	AT1G24706.2.AT1G24706.3.AT1G24706.4.AT1G24706.5.AT1G24706.6.AT1G24706.7.AT1G24706.8.AT1G24706.9	AT1G24706.1	THO2	Encodes a component of the putative Arabidopsis THO/TREX complex: THO1 or HPR1 (At5g09860)%2C THO2 (At1g24706)%2C THO3 or TEX1 (At5g56130)%2C THO5 (At5g42920%2C At1g45233)%2C THO6 (At2g19430)%2C and THO7 (At5g16790%2C At3g02950). THO/TREX complexes in animals have been implicated in the transport of mRNA precursors. Mutants of THO3/TEX1%2C THO1%2C THO6 accumulate reduced amount of small interferi…	"THO2"	NA	NA	THO2%3B FUNCTIONS IN: molecular_function unknown%3B INVOLVED IN: biological_process unknown%3B LOCATED IN: cellular_component unknown%3B EXPRESSED IN: 24 plant structures%3B EXPRESSED DURING: 13 growth stages%3B CONTAINS InterPro DOMAIN/s: THO complex%2C subunitTHOC2%2C C-region (InterPro:IPR021418)%2C THO complex%2C subunitTHOC2%2C N-region (InterPro:IPR021726)%3B Has 19944 Blast hits to 14322 p…	****	gene:2826041.UniProt:F4IAT3	NA	'16.9.1.1.1.2'	'RNA processing.messenger ribonucleoprotein particle (mRNP).mRNP export.TREX/THO mRNP trafficking complex.THO subcomplex.THOC2/Tho2 component'	'RNA processing.messenger ribonucleoprotein particle (mRNP).mRNP export.TREX/THO mRNP trafficking complex.THO subcomplex.THOC2/Tho2 component (original description: none)'
Vitvi00g01367	445.738	1.18805	0.658697	1.80364	0.0712877	0.141106	445.738	1.33662	0.584895	2.28523	0.0222992	0.0474241	445.738	0.570985	0.589028	0.969369	0.332361	0.444117	445.738	0.994352	0.584435	1.70139	0.0888694	0.149767	VIT_00s2508g00010	AT2G37040.1	2.3e-177	621.7	1-to-1	NA	AT2G37040.1	PHE ammonia lyase 1	Encodes PAL1%2C a phenylalanine ammonia-lyase. Arabidopsis has four PALs: AT2G37040 (PAL1)%2C AT3G53260 (PAL2)%2C AT5G04230 (PAL3) and AT3G10340 (PAL4).	"PAL1"	ATPAL1	PHE ammonia lyase 1	PHE ammonia lyase 1 (PAL1)%3B FUNCTIONS IN: phenylalanine ammonia-lyase activity%3B INVOLVED IN: in 10 processes%3B LOCATED IN: cytoplasm%3B EXPRESSED IN: 22 plant structures%3B EXPRESSED DURING: 13 growth stages%3B CONTAINS InterPro DOMAIN/s: Phenylalanine/histidine ammonia-lyase (InterPro:IPR001106)%2C Phenylalanine/histidine ammonia-lyases%2C active site (InterPro:IPR022313)%2C L-Aspartase-lik…	****	PMID:7888622.PMID:15634198.PMID:16299170.PMID:17158583.PMID:18251883.PMID:18242769.gene:2057980.UniProt:P35510	NA	'9.2.1.1'	'Secondary metabolism.phenolics.p-coumaroyl-CoA synthesis.phenylalanine ammonia lyase (PAL)'	'Secondary metabolism.phenolics.p-coumaroyl-CoA synthesis.phenylalanine ammonia lyase (PAL) (original description: none)'
Vitvi00g01369	262.98	-4.68216	1.80564	-2.59307	0.00951244	0.0276204	262.98	-3.18717	1.60577	-1.98482	0.0471642	0.0892832	262.98	-3.48437	1.61429	-2.15845	0.0308925	0.0620491	262.98	-4.00525	1.61768	-2.47593	0.0132891	0.0295984	VIT_00s2520g00010	AT5G56970.1	5.6e-62	237.3	1-to-many	AT5G56970.2	AT5G56970.1	cytokinin oxidase 3	It encodes a protein whose sequence is similar to cytokinin oxidase/dehydrogenase%2C which catalyzes the degradation of cytokinins.	"CKX3"	ATCKX3	cytokinin oxidase 3	cytokinin oxidase 3 (CKX3)%3B FUNCTIONS IN: primary amine oxidase activity%2C cytokinin dehydrogenase activity%3B INVOLVED IN: cytokinin catabolic process%3B LOCATED IN: vacuole%3B EXPRESSED IN: 14 plant structures%3B EXPRESSED DURING: 6 growth stages%3B CONTAINS InterPro DOMAIN/s: Cytokinin dehydrogenase 1%2C FAD/cytokinin binding domain (InterPro:IPR015345)%2C FAD-binding%2C type 2 (InterPro:IP…	****	gene:2164614.UniProt:Q9LTS3	NA	'11.4.3.2'	'Phytohormones.cytokinin.conjugation and degradation.cytokinin dehydrogenase'	'Phytohormones.cytokinin.conjugation and degradation.cytokinin dehydrogenase (original description: none)'
Vitvi00g01378	0.149577	-0.621148	6.57192	-0.0945154	0.9247	NA	0.149577	-0.846977	5.88922	-0.143818	0.885644	NA	0.149577	-1.45621	5.85885	-0.248548	0.803711	NA	0.149577	0	5.88968	0	1	NA	VIT_00s2549g00010	AT1G11410.1	1.5e-33	142.9	1-to-many	AT1G11410.2.AT1G11410.3.AT1G11410.4	AT1G11410.1	S-locus lectin protein kinase family protein	NA	NA	NA	NA	S-locus lectin protein kinase family protein%3B FUNCTIONS IN: in 6 functions%3B INVOLVED IN: protein amino acid phosphorylation%2C recognition of pollen%3B LOCATED IN: endomembrane system%3B EXPRESSED IN: 21 plant structures%3B EXPRESSED DURING: 13 growth stages%3B CONTAINS InterPro DOMAIN/s: Curculin-like (mannose-binding) lectin (InterPro:IPR001480)%2C Apple-like (InterPro:IPR003609)%2C PAN-2 d…	****	gene:2200135.UniProt:Q9LPZ3	NA	'50.2.7'	'Enzyme classification.EC_2 transferases.EC_2.7 transferase transferring phosphorus-containing group'	'G-type lectin S-receptor-like serine/threonine-protein kinase At1g11410 OS=Arabidopsis thaliana (sp|q9lpz3|y1141_arath : 142.0) & Enzyme classification.EC_2 transferases.EC_2.7 transferase transferring phosphorus-containing group(50.2.7 : 51.2) (original description: none)'
Vitvi00g01380	59.2471	0.58799	0.337342	1.74301	0.081332	0.156982	59.2471	1.80651	0.304625	5.93027	3.02438e-09	2.96542e-08	59.2471	1.14307	0.320437	3.56723	0.000360774	0.00120674	59.2471	1.45986	0.29356	4.97297	6.59357e-07	4.04769e-06		AT1G28240.1	1.2e-24	113.2	1-to-1	NA	AT1G28240.1	strawberry notch protein (DUF616)	NA	NA	NA	NA	Protein of unknown function (DUF616)%3B CONTAINS InterPro DOMAIN/s: Protein of unknown function DUF616 (InterPro:IPR006852)%3B BEST Arabidopsis thaliana protein match is: Protein of unknown function (DUF616) (TAIR:AT1G53040.2)%3B Has 322 Blast hits to 322 proteins in 41 species: Archae - 14%3B Bacteria - 34%3B Metazoa - 0%3B Fungi - 4%3B Plants - 225%3B Viruses - 1%3B Other Eukaryotes - 44 (sourc…	****	gene:2032136.UniProt:Q9FZ97	NA	'35.2'	'not assigned.not annotated'	' no hits & (original description: none)'
Vitvi00g01382	3724.35	0.423806	0.418698	1.0122	0.311442	0.440765	3724.35	0.652476	0.374173	1.74378	0.0811971	0.140946	3724.35	1.41794	0.374292	3.78833	0.000151662	0.000552968	3724.35	0.501617	0.374189	1.34055	0.180068	0.268437	VIT_00s2576g00010	AT4G37870.1	8.8e-36	150.2	1-to-1	NA	AT4G37870.1	phosphoenolpyruvate carboxykinase 1	Encodes a phosphoenolpyruvate carboxykinase that localizes to the cytosol.	"PCK1"	PEPCK.PHOSPHOENOLPYRUVATE CARBOXYKINASE	phosphoenolpyruvate carboxykinase 1	phosphoenolpyruvate carboxykinase 1 (PCK1)%3B FUNCTIONS IN: phosphoenolpyruvate carboxykinase activity%2C purine nucleotide binding%2C phosphoenolpyruvate carboxykinase (ATP) activity%2C ATP binding%3B INVOLVED IN: defense response to fungus%2C incompatible interaction%2C response to cadmium ion%2C cellular response to phosphate starvation%2C gluconeogenesis%3B LOCATED IN: cytosol%2C nucleolus%2C…	****	PMID:15496452.PMID:16502469.PMID:17432890.PMID:18182375.PMID:18433157.gene:2137593.UniProt:Q9T074	NA	'35.1'	'not assigned.annotated'	'Phosphoenolpyruvate carboxykinase (ATP) OS=Cucumis sativus (sp|p42066|pcka_cucsa : 154.0)'
Vitvi00g01383	9580.88	-0.0630026	0.168776	-0.37329	0.708932	0.79908	9580.88	0.57253	0.150841	3.79557	0.000147302	0.000580205	9580.88	0.0417883	0.151185	0.276405	0.782237	0.845898	9580.88	-0.182648	0.150822	-1.21102	0.225889	0.32229	VIT_00s2579g00010	AT2G17630.1	5.9e-192	668.7	1-to-1	NA	AT2G17630.1	Pyridoxal phosphate (PLP)-dependent transferases superfamily protein	NA	NA	PSAT2.phosphoserine aminotransferase 2	NA	Pyridoxal phosphate (PLP)-dependent transferases superfamily protein%3B FUNCTIONS IN: pyridoxal phosphate binding%2C transaminase activity%2C catalytic activity%2C O-phospho-L-serine:2-oxoglutarate aminotransferase activity%3B INVOLVED IN: response to cadmium ion%3B LOCATED IN: chloroplast%3B EXPRESSED IN: 23 plant structures%3B EXPRESSED DURING: 13 growth stages%3B CONTAINS InterPro DOMAIN/s: Py…	*****	PMID:16247729.PMID:16502469.PMID:18431481.gene:2057258.UniProt:Q9SHP0	NA	'4.1.4.1.2'	'Amino acid metabolism.biosynthesis.serine family.non-photorespiratory serine.phosphoserine aminotransferase'	'Amino acid metabolism.biosynthesis.serine family.non-photorespiratory serine.phosphoserine aminotransferase (original description: none)'
Vitvi00g01384	640.143	-0.077836	0.161214	-0.482812	0.629229	0.736674	640.143	0.318928	0.144377	2.20899	0.0271751	0.0561291	640.143	-0.00776343	0.142921	-0.0543196	0.956681	0.972225	640.143	0.0837239	0.144797	0.578217	0.563117	0.661584	VIT_00s2580g00010	AT4G22285.1	8.3e-18	90.5	1-to-many	AT4G22285.2.AT4G22350.1.AT4G22350.2.AT4G22410.1.AT4G22410.2	AT4G22285.1	Ubiquitin C-terminal hydrolases superfamily protein	NA	NA	NA	NA	Ubiquitin C-terminal hydrolases superfamily protein%3B FUNCTIONS IN: ubiquitin thiolesterase activity%2C zinc ion binding%3B INVOLVED IN: ubiquitin-dependent protein catabolic process%3B LOCATED IN: intracellular%3B CONTAINS InterPro DOMAIN/s: Zinc finger%2C C2H2-like (InterPro:IPR015880)%2C Zinc finger%2C UBP-type (InterPro:IPR001607)%2C Peptidase C19%2C ubiquitin carboxyl-terminal hydrolase 2 (…	****	PMID:21166475.gene:4010712931.UniProt:Q8H148	NA	'35.2'	'not assigned.not annotated'	' no hits & (original description: none)'
Vitvi00g01390	5.84631	-3.04847	1.10348	-2.76259	0.00573451	0.0181516	5.84631	-0.00428785	0.964246	-0.00444684	0.996452	0.999195	5.84631	0.0163602	0.885576	0.0184741	0.985261	0.993219	5.84631	0.259905	0.955341	0.272055	0.78558	0.845319	VIT_00s2608g00010	ATCG00680.1	6.5e-108	388.7	1-to-1	NA	ATCG00680.1	photosystem II reaction center protein B	encodes for CP47%2C subunit of the photosystem II reaction center.	"PSBB"	NA	photosystem II reaction center protein B	photosystem II reaction center protein B (PSBB)%3B FUNCTIONS IN: chlorophyll binding%3B INVOLVED IN: photosynthesis%2C light reaction%2C photosystem II assembly%3B LOCATED IN: in 6 components%3B EXPRESSED IN: 24 plant structures%3B EXPRESSED DURING: 13 growth stages%3B CONTAINS InterPro DOMAIN/s: Photosystem antenna protein-like (InterPro:IPR000932)%2C Photosystem II%2C PsbB (InterPro:IPR017486)%…	*****	PMID:9112766.PMID:8768377.PMID:11549768.PMID:12782738.PMID:14519118.PMID:14729914.PMID:15322131.PMID:15918885.PMID:16461379.PMID:17175536.PMID:17432890.PMID:18431481.PMID:18633119.gene:1009022880	NA	'35.1'	'not assigned.annotated'	'Photosystem II CP47 reaction center protein OS=Lotus japonicus (sp|q9bbq8|psbb_lotja : 371.0)'
Vitvi00g01392	1320.21	2.18848	0.231763	9.44275	3.63112e-21	2.10684e-19	1320.21	1.96085	0.208076	9.42374	4.35289e-21	1.67283e-19	1320.21	3.48594	0.210713	16.5436	1.78202e-61	7.11715e-59	1320.21	2.11419	0.209366	10.098	5.6364e-24	2.95036e-22	VIT_00s2620g00010	AT1G65610.1	3.9e-98	357.5	1-to-1	NA	AT1G65610.1	Six-hairpin glycosidases superfamily protein	NA	"KOR2"	ATGH9A2.ARABIDOPSIS THALIANA GLYCOSYL HYDROLASE 9A2.AtKOR2	KORRIGAN 2	KORRIGAN 2 (KOR2)%3B FUNCTIONS IN: hydrolase activity%2C hydrolyzing O-glycosyl compounds%2C catalytic activity%3B INVOLVED IN: carbohydrate metabolic process%3B LOCATED IN: cellular_component unknown%3B EXPRESSED IN: stem%2C sepal%2C root%2C leaf%2C stamen%3B EXPRESSED DURING: LP.06 six leaves visible%2C 4 anthesis%2C petal differentiation and expansion stage%2C LP.08 eight leaves visible%3B CON…	*****	gene:2034157.UniProt:O04478	NA	'35.1'	'not assigned.annotated'	'Endoglucanase 12 OS=Oryza sativa subsp. japonica (sp|q7xuk4|gun12_orysj : 405.0)'
Vitvi00g01393	0	NA	NA	NA	NA	NA	0	NA	NA	NA	NA	NA	0	NA	NA	NA	NA	NA	0	NA	NA	NA	NA	NA		NA	NA	NA	NA	NA	NA	NA	NA	NA	NA	NA	NA	NA	NA	NA	'35.1'	'not assigned.annotated'	'Serine/threonine-protein phosphatase 2A 65 kDa regulatory subunit A beta isoform OS=Arabidopsis thaliana (sp|q38950|2aab_arath : 130.0)'
Vitvi00g01394	269.458	0.143002	0.276607	0.516988	0.605165	0.716459	269.458	0.538933	0.248641	2.16751	0.0301957	0.0612567	269.458	-0.190267	0.250155	-0.760598	0.446897	0.558812	269.458	-0.245269	0.251534	-0.975094	0.329514	0.435932		AT3G07420.1	6.5e-77	287	1-to-many	AT3G07420.2	AT3G07420.1	asparaginyl-tRNA synthetase 2	Encodes an asparaginyl-tRNA synthetase.	"NS2"	ATNS2.ASPARAGINYL-TRNA SYNTHETASE 2.SYNC2_ARATH.ASPARAGINYL-TRNA SYNTHETASE 2.SYNC2.SYNTHETASE C2	asparaginyl-tRNA synthetase 2	asparaginyl-tRNA synthetase 2 (NS2)%3B CONTAINS InterPro DOMAIN/s: Aminoacyl-tRNA synthetase%2C class II (D/K/N) (InterPro:IPR004364)%2C Aminoacyl-tRNA synthetase%2C class II (D/K/N)-like (InterPro:IPR018150)%3B BEST Arabidopsis thaliana protein match is: Class II aminoacyl-tRNA and biotin synthetases superfamily protein (TAIR:AT5G56680.1)%3B Has 9059 Blast hits to 7126 proteins in 1951 species: …	****	gene:2079645.UniProt:Q9SW95	NA	'17.2.3'	'Protein biosynthesis.aminoacyl-tRNA synthetase activities.asparagine-tRNA ligase'	'Protein biosynthesis.aminoacyl-tRNA synthetase activities.asparagine-tRNA ligase (original description: none)'
Vitvi00g01397	790.966	1.48995	0.287565	5.18125	2.20402e-07	2.235e-06	790.966	2.1432	0.257356	8.32774	8.23992e-17	2.14835e-15	790.966	2.00661	0.257224	7.80102	6.14109e-15	1.13851e-13	790.966	1.81988	0.257462	7.06853	1.56582e-12	2.38221e-11	VIT_00s2648g00010	AT2G20800.1	5e-36	151	1-to-1	NA	AT2G20800.1	NAD(P)H dehydrogenase B4	NA	"NDB4"	NA	NAD(P)H dehydrogenase B4	NAD(P)H dehydrogenase B4 (NDB4)%3B FUNCTIONS IN: NADH dehydrogenase activity%3B INVOLVED IN: oxidation reduction%3B LOCATED IN: extrinsic to mitochondrial inner membrane%2C mitochondrion%2C plastid%3B EXPRESSED IN: 7 plant structures%3B CONTAINS InterPro DOMAIN/s: Pyridine nucleotide-disulphide oxidoreductase%2C class-II (InterPro:IPR000103)%2C FAD-dependent pyridine nucleotide-disulphide oxidore…	****	PMID:14671022.PMID:15276431.PMID:16618929.PMID:17322330.PMID:17673460.gene:2051430.UniProt:Q9SKT7	NA	'35.1'	'not assigned.annotated'	'External alternative NAD(P)H-ubiquinone oxidoreductase B4. mitochondrial OS=Arabidopsis thaliana (sp|q9skt7|ndb4_arath : 146.0)'
Vitvi00g01399	0	NA	NA	NA	NA	NA	0	NA	NA	NA	NA	NA	0	NA	NA	NA	NA	NA	0	NA	NA	NA	NA	NA	VIT_00s2651g00010	AT5G40820.1	2.7e-16	82	1-to-many	AT5G40820.2.AT5G40820.3.AT5G40820.4	AT5G40820.1	Ataxia telangiectasia-mutated and RAD3-like protein	Encodes a Arabidopsis ortholog of the ATR protein kinase that is involved in a wide range of responses to DNA damage and plays a central role in cell-cycle regulation. Dominant loss of function alleles identified as suppressors of ALS also exhibit increased tolerance to aluminum. This may be due to the inhibition of terminal differentiation of the root apex upon exposure to Al.	"ATR"	ATATR.ARABIDOPSIS THALIANA ATAXIA TELANGIECTASIA-MUTATED AND RAD3-RELATED.ATRAD3	Ataxia telangiectasia-mutated and RAD3-related	Ataxia telangiectasia-mutated and RAD3-related (ATR)%3B FUNCTIONS IN: protein serine/threonine kinase activity%2C inositol or phosphatidylinositol kinase activity%2C binding%2C phosphotransferase activity%2C alcohol group as acceptor%3B INVOLVED IN: in 9 processes%3B EXPRESSED IN: 10 plant structures%3B EXPRESSED DURING: 6 growth stages%3B CONTAINS InterPro DOMAIN/s: Phosphatidylinositol 3-/4-kin…	*****	PMID:10611295.PMID:15276459.PMID:17227549.PMID:17209125.PMID:17487278.PMID:18435824.PMID:18528439.gene:2164480.UniProt:Q9FKS4	NA	'35.1'	'not assigned.annotated'	'Serine/threonine-protein kinase ATR OS=Arabidopsis thaliana (sp|q9fks4|atr_arath : 84.7)'
Vitvi00g01402	0.795336	1.30805	3.51162	0.372492	0.709527	NA	0.795336	1.07645	3.40419	0.316214	0.75184	NA	0.795336	2.53631	3.32951	0.761767	0.446199	0.558213	0.795336	0.162726	3.13824	0.0518526	0.958646	NA		AT3G50380.1	2.7e-09	62	1-to-many	AT3G50380.2.AT3G50380.3.AT3G50380.4	AT3G50380.1	vacuolar protein sorting-associated protein%2C putative (DUF1162)	NA	NA	NA	NA	INVOLVED IN: protein localization%3B LOCATED IN: mitochondrion%3B EXPRESSED IN: 22 plant structures%3B EXPRESSED DURING: 13 growth stages%3B CONTAINS InterPro DOMAIN/s: Vacuolar protein sorting-associated protein (InterPro:IPR009543)%3B Has 365 Blast hits to 355 proteins in 118 species: Archae - 0%3B Bacteria - 0%3B Metazoa - 156%3B Fungi - 111%3B Plants - 61%3B Viruses - 0%3B Other Eukaryotes - …	**	gene:2074809.UniProt:F4J0L9	NA	'35.2'	'not assigned.not annotated'	' no hits & (original description: none)'
Vitvi00g01403	12.4006	-0.645606	0.717851	-0.899359	0.368461	0.499208	12.4006	-0.791603	0.630845	-1.25483	0.20954	0.305375	12.4006	-0.157069	0.621957	-0.252539	0.800624	0.859566	12.4006	0.300941	0.63502	0.473907	0.635566	0.723743		AT3G50430.2	1.7e-10	64.3	1-to-1	NA	AT3G50430.2	golgin	NA	NA	NA	NA	NA	NA	NA	NA	'35.2'	'not assigned.not annotated'	' no hits & (original description: none)'
Vitvi00g01404	0	NA	NA	NA	NA	NA	0	NA	NA	NA	NA	NA	0	NA	NA	NA	NA	NA	0	NA	NA	NA	NA	NA		NA	NA	NA	NA	NA	NA	NA	NA	NA	NA	NA	NA	NA	NA	NA	'35.2'	'not assigned.not annotated'	' no hits & (original description: none)'
Vitvi00g01405	1.33003	-4.06476	2.15674	-1.88468	0.0594731	0.122489	1.33003	-4.18018	1.88009	-2.2234	0.0261889	0.0544089	1.33003	-3.61058	1.8895	-1.91086	0.0560225	0.103238	1.33003	-1.08753	2.17429	-0.500178	0.61695	0.707653		NA	NA	NA	NA	NA	NA	NA	NA	NA	NA	NA	NA	NA	NA	NA	'35.2'	'not assigned.not annotated'	' no hits & (original description: none)'
Vitvi00g01406	87.4286	0.455289	0.457267	0.995674	0.319409	0.44904	87.4286	0.418887	0.417191	1.00407	0.315347	0.422587	87.4286	-0.0422428	0.410555	-0.102892	0.918049	0.943911	87.4286	1.1054	0.425558	2.59753	0.00938966	0.021793	VIT_00s2705g00010	AT1G11440.1	2.8e-05	48.1	1-to-1	NA	AT1G11440.1	hypothetical protein	NA	NA	NA	NA	BEST Arabidopsis thaliana protein match is: glycine-rich protein (TAIR:AT3G29075.1)%3B Has 19337 Blast hits to 8589 proteins in 488 species: Archae - 26%3B Bacteria - 641%3B Metazoa - 7852%3B Fungi - 2167%3B Plants - 955%3B Viruses - 616%3B Other Eukaryotes - 7080 (source: NCBI BLink).	*****	gene:2200050.UniProt:Q9LPZ0	NA	'35.2'	'not assigned.not annotated'	' no hits & (original description: none)'
Vitvi00g01408	0	NA	NA	NA	NA	NA	0	NA	NA	NA	NA	NA	0	NA	NA	NA	NA	NA	0	NA	NA	NA	NA	NA		NA	NA	NA	NA	NA	NA	NA	NA	NA	NA	NA	NA	NA	NA	NA	'35.2'	'not assigned.not annotated'	' no hits & (original description: none)'
Vitvi00g01409	0.909781	-0.416172	2.2341	-0.186282	0.852224	NA	0.909781	-1.85604	1.97371	-0.940383	0.347021	0.454532	0.909781	0.0869259	1.66578	0.0521832	0.958383	0.973495	0.909781	-1.97703	2.10792	-0.937905	0.348293	0.455631	VIT_00s2715g00010	AT1G22060.1	1.6e-22	105.1	1-to-many	AT1G22060.2	AT1G22060.1	sporulation-specific protein	NA	NA	NA	NA	LOCATED IN: vacuole%3B EXPRESSED IN: 23 plant structures%3B EXPRESSED DURING: 13 growth stages%3B BEST Arabidopsis thaliana protein match is: FBD%2C F-box and Leucine Rich Repeat domains containing protein (TAIR:AT1G22000.1)%3B Has 84739 Blast hits to 38714 proteins in 2257 species: Archae - 1436%3B Bacteria - 11314%3B Metazoa - 40747%3B Fungi - 7706%3B Plants - 4675%3B Viruses - 308%3B Other Euk…	***	PMID:15539469.gene:2030540.UniProt:F4HZS8	NA	'35.1'	'not assigned.annotated'	'Midasin OS=Arabidopsis thaliana (sp|a0a1p8auy4|mdn1_arath : 89.4)'
Vitvi00g01410	0	NA	NA	NA	NA	NA	0	NA	NA	NA	NA	NA	0	NA	NA	NA	NA	NA	0	NA	NA	NA	NA	NA		NA	NA	NA	NA	NA	NA	NA	NA	NA	NA	NA	NA	NA	NA	NA	'35.2'	'not assigned.not annotated'	' no hits & (original description: none)'
Vitvi00g01412	87.7377	0.705387	0.440656	1.60077	0.109429	0.198657	87.7377	1.10714	0.388603	2.84902	0.00438541	0.0116529	87.7377	0.671308	0.390697	1.71823	0.0857545	0.147853	87.7377	1.19518	0.386439	3.09282	0.00198267	0.00557007	VIT_00s2745g00010	AT4G23160.1	1.6e-48	192.2	1-to-1	NA	AT4G23160.1	cysteine-rich RECEPTOR-like kinase	Encodes a cysteine-rich receptor-like protein kinase.	"CRK8"	NA	cysteine-rich RLK (RECEPTOR-like protein kinase) 8	cysteine-rich RLK (RECEPTOR-like protein kinase) 8 (CRK8)%3B FUNCTIONS IN: kinase activity%3B INVOLVED IN: protein amino acid phosphorylation%3B CONTAINS InterPro DOMAIN/s: Protein kinase%2C ATP binding site (InterPro:IPR017441)%2C Reverse transcriptase%2C RNA-dependent DNA polymerase (InterPro:IPR013103)%2C Serine/threonine-protein kinase domain (InterPro:IPR002290)%2C Protein of unknown functio…	**	gene:2121650	NA	'50.2.7'	'Enzyme classification.EC_2 transferases.EC_2.7 transferase transferring phosphorus-containing group'	'Cysteine-rich receptor-like protein kinase 26 OS=Arabidopsis thaliana (sp|q9t0j1|crk26_arath : 130.0) & Enzyme classification.EC_2 transferases.EC_2.7 transferase transferring phosphorus-containing group(50.2.7 : 49.8) (original description: none)'
Vitvi00g01413	14.4809	-5.6892	1.44133	-3.94718	7.90785e-05	0.000453991	14.4809	-3.63319	0.813636	-4.46538	7.99274e-06	4.18218e-05	14.4809	-7.10281	1.26263	-5.62542	1.85062e-08	1.40821e-07	14.4809	-6.27656	1.26538	-4.96022	7.04145e-07	4.29657e-06	VIT_00s2752g00010	AT3G19820.1	4e-46	183.3	1-to-many	AT3G19820.2.AT3G19820.3	AT3G19820.1	cell elongation protein / DWARF1 / DIMINUTO (DIM)	Involved in the conversion of the early brassinosteroid precursor 24-methylenecholesterol to campesterol. Brassinosteroids affect cellular elongation. Mutants have dwarf phenotype. DWF1 is a Ca2+-dependent calmodulin-binding protein.	"DWF1"	CBB1.CABBAGE 1.DIM1.DIMINUTO 1.DIM.DIMINUTIA.EVE1.ENHANCED VERY-LOW-FLUENCE RESPONSES 1	DWARF 1	DWARF 1 (DWF1)%3B FUNCTIONS IN: calmodulin binding%2C catalytic activity%3B INVOLVED IN: response to light stimulus%2C steroid biosynthetic process%2C unidimensional cell growth%2C brassinosteroid biosynthetic process%3B LOCATED IN: integral to membrane%2C plasma membrane%2C vacuole%2C membrane%3B EXPRESSED IN: 25 plant structures%3B EXPRESSED DURING: 14 growth stages%3B CONTAINS InterPro DOMAIN/…	*****	PMID:9761794.PMID:7828854.PMID:15215502.PMID:15539469.PMID:17151019.PMID:17317660.PMID:17432890.gene:2092275.UniProt:Q39085	NA	'35.1'	'not assigned.annotated'	'Delta(24)-sterol reductase OS=Pisum sativum (sp|p93472|dim_pea : 199.0)'
Vitvi00g01415	0	NA	NA	NA	NA	NA	0	NA	NA	NA	NA	NA	0	NA	NA	NA	NA	NA	0	NA	NA	NA	NA	NA		NA	NA	NA	NA	NA	NA	NA	NA	NA	NA	NA	NA	NA	NA	NA	'35.2'	'not assigned.not annotated'	' no hits & (original description: none)'
Vitvi00g01416	0.502319	2.62926	6.55297	0.401232	0.68825	NA	0.502319	0	5.88922	0	1	NA	0.502319	4.25008	5.79411	0.733517	0.463243	NA	0.502319	1.5427	5.8704	0.262793	0.79271	NA		AT2G25730.1	9.2e-22	102.4	1-to-many	AT2G25730.2.AT2G25730.3.AT2G25730.4	AT2G25730.1	zinc finger FYVE domain protein	NA	NA	NA	NA	unknown protein%3B Has 157 Blast hits to 144 proteins in 62 species: Archae - 0%3B Bacteria - 0%3B Metazoa - 101%3B Fungi - 0%3B Plants - 35%3B Viruses - 0%3B Other Eukaryotes - 21 (source: NCBI BLink).	**	PMID:15276459.gene:2050316.UniProt:Q9SL90	NA	'35.2'	'not assigned.not annotated'	' no hits & (original description: none)'
Vitvi00g01417	285.67	-1.30041	0.482458	-2.69538	0.00703091	0.0214708	285.67	-1.64727	0.438108	-3.75996	0.000169944	0.000661191	285.67	-2.6912	0.437791	-6.14722	7.88516e-10	7.40993e-09	285.67	-3.59815	0.449807	-7.99933	1.25103e-15	2.85097e-14	VIT_00s2783g00010	AT4G17340.1	1.8e-56	216.5	1-to-1	NA	AT4G17340.1	tonoplast intrinsic protein 2%3B2	NA	"TIP2%3B2"	DELTA-TIP2	tonoplast intrinsic protein 2%3B2	tonoplast intrinsic protein 2%3B2 (TIP2%3B2)%3B FUNCTIONS IN: water channel activity%3B INVOLVED IN: response to salt stress%2C transport%3B LOCATED IN: in 6 components%3B EXPRESSED IN: 25 plant structures%3B EXPRESSED DURING: 10 growth stages%3B CONTAINS InterPro DOMAIN/s: Major intrinsic protein%2C conserved site (InterPro:IPR022357)%2C Aquaporin (InterPro:IPR012269)%2C Major intrinsic protein …	****	PMID:15028209.PMID:15539469.PMID:16183846.PMID:17151019.gene:2130882.UniProt:Q41975	NA	'35.1'	'not assigned.annotated'	'Probable aquaporin TIP-type OS=Antirrhinum majus (sp|p33560|tip_antma : 192.0)'
Vitvi00g01419	2.48341	0.127615	1.48775	0.0857775	0.931643	0.958617	2.48341	-0.383815	1.19119	-0.322211	0.747293	0.813916	2.48341	-0.468009	1.25011	-0.374373	0.708127	0.78756	2.48341	0.077452	1.01903	0.076006	0.939414	0.961621	GSVIVT01006529001	NA	NA	NA	NA	NA	NA	NA	NA	NA	NA	NA	NA	NA	NA	NA	'35.2'	'not assigned.not annotated'	' no hits & (original description: none)'
Vitvi00g01420	0	NA	NA	NA	NA	NA	0	NA	NA	NA	NA	NA	0	NA	NA	NA	NA	NA	0	NA	NA	NA	NA	NA		NA	NA	NA	NA	NA	NA	NA	NA	NA	NA	NA	NA	NA	NA	NA	'35.2'	'not assigned.not annotated'	' no hits & (original description: none)'
Vitvi00g01421	105.291	0.555232	0.498882	1.11295	0.265729	0.391744	105.291	0.732866	0.447453	1.63786	0.101451	0.169493	105.291	0.453145	0.448472	1.01042	0.312294	0.423395	105.291	-0.0634624	0.44635	-0.142181	0.886937	0.923659	VIT_00s2795g00010	AT3G25530.1	1.5e-21	100.1	1-to-many	AT3G25530.3	AT3G25530.1	glyoxylate reductase 1	Encodes gamma-hydroxybutyrate dehydrogenase (AtGHBDH). Contains a NADP-binding domain. GHBDH is proposed to function in oxidative stress tolerance.	"GLYR1"	ATGHBDH.AtGLYR1.GHBDH.GR1.GLYOXYLATE REDUCTASE 1	glyoxylate reductase 1	glyoxylate reductase 1 (GLYR1)%3B FUNCTIONS IN: 3-hydroxybutyrate dehydrogenase activity%2C phosphogluconate dehydrogenase (decarboxylating) activity%3B INVOLVED IN: response to oxidative stress%3B LOCATED IN: cytosol%3B EXPRESSED IN: 23 plant structures%3B EXPRESSED DURING: 15 growth stages%3B CONTAINS InterPro DOMAIN/s: 6-phosphogluconate dehydrogenase%2C NAD-binding (InterPro:IPR006115)%2C 6-p…	****	PMID:18495639.gene:2094517.UniProt:Q9LSV0	NA	'35.1'	'not assigned.annotated'	'Glyoxylate/succinic semialdehyde reductase 1 OS=Arabidopsis thaliana (sp|q9lsv0|glyr1_arath : 99.4)'
Vitvi00g01423	0	NA	NA	NA	NA	NA	0	NA	NA	NA	NA	NA	0	NA	NA	NA	NA	NA	0	NA	NA	NA	NA	NA		NA	NA	NA	NA	NA	NA	NA	NA	NA	NA	NA	NA	NA	NA	NA	'35.2'	'not assigned.not annotated'	' no hits & (original description: none)'
Vitvi00g01424	196.557	0.0481718	0.166924	0.288585	0.772899	0.848568	196.557	-0.0345235	0.153763	-0.224524	0.82235	0.871906	196.557	0.335481	0.150244	2.2329	0.0255554	0.0525758	196.557	0.28751	0.153054	1.87848	0.0603149	0.108531	VVTU37610_at	AT3G60800.1	4.6e-21	100.5	1-to-1	NA	AT3G60800.1	DHHC-type zinc finger family protein	NA	NA	NA	NA	DHHC-type zinc finger family protein%3B FUNCTIONS IN: zinc ion binding%3B INVOLVED IN: biological_process unknown%3B EXPRESSED IN: 23 plant structures%3B EXPRESSED DURING: 13 growth stages%3B CONTAINS InterPro DOMAIN/s: Zinc finger%2C DHHC-type (InterPro:IPR001594)%3B BEST Arabidopsis thaliana protein match is: DHHC-type zinc finger family protein (TAIR:AT4G22750.1)%3B Has 5091 Blast hits to 5089…	****	PMID:17932292.gene:2101805.UniProt:Q8VYP5	NA	'35.1'	'not assigned.annotated'	'Probable protein S-acyltransferase 14 OS=Arabidopsis thaliana (sp|q8vyp5|zdh14_arath : 98.2)'
Vitvi00g01425	105.124	-0.0730576	0.232648	-0.314027	0.753501	0.833821	105.124	-0.841662	0.225768	-3.72799	0.000193013	0.000739363	105.124	-0.905005	0.214169	-4.22565	2.3825e-05	0.000103316	105.124	-0.525245	0.231663	-2.26728	0.0233729	0.0483306	VIT_00s2829g00010	AT1G11440.1	6e-05	47	1-to-1	NA	AT1G11440.1	hypothetical protein	NA	NA	NA	NA	BEST Arabidopsis thaliana protein match is: glycine-rich protein (TAIR:AT3G29075.1)%3B Has 19337 Blast hits to 8589 proteins in 488 species: Archae - 26%3B Bacteria - 641%3B Metazoa - 7852%3B Fungi - 2167%3B Plants - 955%3B Viruses - 616%3B Other Eukaryotes - 7080 (source: NCBI BLink).	*****	gene:2200050.UniProt:Q9LPZ0	NA	'35.2'	'not assigned.not annotated'	' no hits & (original description: none)'
Vitvi00g01428	88.4777	2.90757	0.229351	12.6774	7.89167e-37	1.4627e-34	88.4777	2.1893	0.231661	9.45045	3.37368e-21	1.31878e-19	88.4777	3.60189	0.249826	14.4176	4.00897e-47	7.23089e-45	88.4777	4.82157	0.434424	11.0988	1.27195e-28	1.01622e-26	VIT_00s2844g00010	AT3G47950.1	1.2e-32	140.2	1-to-many	AT3G47950.2	AT3G47950.1	H[+]-ATPase 4	mutant has Slight reduction in root and shoot growth%3B Exaggerated defects in salt stress%3B Plasma Membrane H+ ATPase	"HA4"	AHA4.H(+)-ATPase 4	H(+)-ATPase 4	H(+)-ATPase 4 (HA4)%3B FUNCTIONS IN: ATPase activity%2C hydrogen-exporting ATPase activity%2C phosphorylative mechanism%3B INVOLVED IN: response to salt stress%3B LOCATED IN: plasma membrane%3B EXPRESSED IN: 17 plant structures%3B EXPRESSED DURING: 6 growth stages%3B CONTAINS InterPro DOMAIN/s: ATPase%2C P-type%2C ATPase-associated domain (InterPro:IPR008250)%2C ATPase%2C P-type cation-transporte…	*****	PMID:14506206.PMID:16618929.PMID:17317660.PMID:17397506.PMID:17644812.gene:2097894.UniProt:Q9SU58	NA	'35.1'	'not assigned.annotated'	'Plasma membrane ATPase 2 (Fragment) OS=Solanum lycopersicum (sp|p23980|pma2_sollc : 133.0)'
Vitvi00g01429	60.4182	3.23184	0.535841	6.03134	1.62608e-09	2.38593e-08	60.4182	4.91343	0.535123	9.18186	4.23722e-20	1.49584e-18	60.4182	2.64506	0.490461	5.39301	6.92885e-08	4.79718e-07	60.4182	3.54784	0.488205	7.26711	3.6725e-13	6.04138e-12	VIT_00s2847g00010	AT1G11300.2	2.9e-105	380.9	1-to-1	NA	AT1G11300.2	G-type lectin S-receptor-like Serine/Threonine-kinase	NA	NA	EGM1.enhanced shoot growth under mannitol stress 1	NA	NA	NA	NA	NA	'50.2.7'	'Enzyme classification.EC_2 transferases.EC_2.7 transferase transferring phosphorus-containing group'	'G-type lectin S-receptor-like serine/threonine-protein kinase At1g11330 OS=Arabidopsis thaliana (sp|q9sxb8|y1133_arath : 377.0) & Enzyme classification.EC_2 transferases.EC_2.7 transferase transferring phosphorus-containing group(50.2.7 : 39.3) (original description: none)'
Vitvi00g01431	3279.98	0.782042	0.630728	1.2399	0.215011	0.33405	3279.98	0.969567	0.563351	1.72107	0.085238	0.146758	3279.98	-0.476195	0.563982	-0.844344	0.398477	0.512006	3279.98	0.0164746	0.563332	0.0292449	0.976669	0.987316	VIT_00s2849g00010	AT3G53260.1	1.2e-152	537.3	1-to-1	NA	AT3G53260.1	phenylalanine ammonia-lyase 2	Encodes phenylalanine lyase. Arabidopsis has four PALs: AT2G37040 (PAL1)%2C AT3G53260 (PAL2)%2C AT5G04230 (PAL3) and AT3G10340 (PAL4).	"PAL2"	ATPAL2	phenylalanine ammonia-lyase 2	phenylalanine ammonia-lyase 2 (PAL2)%3B FUNCTIONS IN: phenylalanine ammonia-lyase activity%3B INVOLVED IN: response to oxidative stress%2C response to karrikin%2C phenylpropanoid biosynthetic process%2C response to wounding%2C defense response%3B LOCATED IN: cytoplasm%3B EXPRESSED IN: 22 plant structures%3B EXPRESSED DURING: 14 growth stages%3B CONTAINS InterPro DOMAIN/s: Phenylalanine/histidine …	****	PMID:7888622.PMID:15634198.gene:2101957.UniProt:P45724	NA	'9.2.1.1'	'Secondary metabolism.phenolics.p-coumaroyl-CoA synthesis.phenylalanine ammonia lyase (PAL)'	'Secondary metabolism.phenolics.p-coumaroyl-CoA synthesis.phenylalanine ammonia lyase (PAL) (original description: none)'
Vitvi00g01433	4.27811	1.41874	0.922595	1.53778	0.124103	0.21839	4.27811	1.50448	0.97819	1.53802	0.124043	0.200104	4.27811	1.56352	0.826724	1.89122	0.0585948	0.10718	4.27811	2.27136	1.00907	2.25093	0.0243899	0.0501629	VIT_00s2855g00010	NA	NA	NA	NA	NA	NA	NA	NA	NA	NA	NA	NA	NA	NA	NA	'35.2'	'not assigned.not annotated'	' no hits & (original description: none)'
Vitvi00g01434	0	NA	NA	NA	NA	NA	0	NA	NA	NA	NA	NA	0	NA	NA	NA	NA	NA	0	NA	NA	NA	NA	NA		NA	NA	NA	NA	NA	NA	NA	NA	NA	NA	NA	NA	NA	NA	NA	'35.2'	'not assigned.not annotated'	' no hits & (original description: none)'
Vitvi00g01437	0.0338169	-0.176311	6.58027	-0.0267939	0.978624	NA	0.0338169	0	5.88922	0	1	NA	0.0338169	0	5.88968	0	1	NA	0.0338169	0	5.88968	0	1	NA		NA	NA	NA	NA	NA	NA	NA	NA	NA	NA	NA	NA	NA	NA	NA	'35.2'	'not assigned.not annotated'	' no hits & (original description: none)'
Vitvi00g01439	22.7916	-0.998205	0.619005	-1.6126	0.106832	0.194978	22.7916	-1.4324	0.596565	-2.40108	0.0163466	0.0363716	22.7916	-2.13012	0.58832	-3.62068	0.000293826	0.0010023	22.7916	-1.11999	0.601596	-1.8617	0.0626461	0.111952		AT5G60440.1	1.3e-19	95.1	1-to-1	NA	AT5G60440.1	AGAMOUS-like 62	AGL62 encodes a Type I MADS domain protein that likely functions as a transcription factor. It is expressed AGL62 is expressed exclusively in the endosperm. AGL62 supresses suppresses cellularization during the syncytial phase of endosperm development.	"AGL62"	NA	AGAMOUS-like 62	AGAMOUS-like 62 (AGL62)%3B FUNCTIONS IN: DNA binding%2C sequence-specific DNA binding transcription factor activity%3B INVOLVED IN: cellularization of endosperm%2C endosperm development%3B LOCATED IN: nucleus%3B EXPRESSED IN: 15 plant structures%3B EXPRESSED DURING: 7 growth stages%3B CONTAINS InterPro DOMAIN/s: Transcription factor%2C MADS-box (InterPro:IPR002100)%3B BEST Arabidopsis thaliana pr…	*****	PMID:11118137.gene:2175187.UniProt:Q9FKK2	"VviMADS1A2i"	'15.7.14'	'RNA biosynthesis.transcriptional activation.MADS box transcription factor'	'RNA biosynthesis.transcriptional activation.MADS box transcription factor (original description: none)'
Vitvi00g01443	0	NA	NA	NA	NA	NA	0	NA	NA	NA	NA	NA	0	NA	NA	NA	NA	NA	0	NA	NA	NA	NA	NA		AT1G61680.1	4.3e-11	65.9	1-to-1	NA	AT1G61680.1	terpene synthase 14	NA	"TPS14"	ATTPS14.TERPENE SYNTHASE 14	terpene synthase 14	terpene synthase 14 (TPS14)%3B CONTAINS InterPro DOMAIN/s: Terpene synthase%2C metal-binding domain (InterPro:IPR005630)%2C Terpenoid synthase (InterPro:IPR008949)%2C Terpenoid cylases/protein prenyltransferase alpha-alpha toroid (InterPro:IPR008930)%2C Terpene synthase-like (InterPro:IPR001906)%3B BEST Arabidopsis thaliana protein match is: terpene synthase 02 (TAIR:AT4G16730.1)%3B Has 1701 Blas…	*****	PMID:9614092.gene:2195767.UniProt:Q84UV0	"VviTPS139"	'50.4.2'	'Enzyme classification.EC_4 lyases.EC_4.2 carbon-oxygen lyase'	'Probable terpene synthase 13 OS=Ricinus communis (sp|b9rxw4|tps13_ricco : 96.7) & Enzyme classification.EC_4 lyases.EC_4.2 carbon-oxygen lyase(50.4.2 : 39.4) (original description: none)'
Vitvi00g01452	0.107481	-1.91629	6.52311	-0.293769	0.768935	NA	0.107481	0	5.88922	0	1	NA	0.107481	0	5.88968	0	1	NA	0.107481	0	5.88968	0	1	NA	VIT_00s1319g00010	AT1G61120.1	4.8e-57	220.7	1-to-1	NA	AT1G61120.1	terpene synthase 04	Encodes a geranyllinalool synthase that produces a precursor to TMTT%2C a volatile plant defense C16-homoterpene. GES transcript levels rise in response to alamethicin%2C a fungal peptide mixture that damages membranes. This transcriptional response is blocked in JA biosynthetic and JA signaling mutants%2C but GES transcript levels still rise in response to alamethicin in mutants with salicylic a…	"TPS04"	GES.GERANYLLINALOOL SYNTHASE.TPS4.TERPENE SYNTHASE 4	terpene synthase 04	terpene synthase 04 (TPS04)%3B CONTAINS InterPro DOMAIN/s: Terpene synthase%2C metal-binding domain (InterPro:IPR005630)%2C Terpenoid synthase (InterPro:IPR008949)%2C Terpenoid cylases/protein prenyltransferase alpha-alpha toroid (InterPro:IPR008930)%2C Terpene synthase-like (InterPro:IPR001906)%3B BEST Arabidopsis thaliana protein match is: Terpenoid cyclases/Protein prenyltransferases superfami…	*****	PMID:17075038.gene:2008484.UniProt:Q93YV0	"VviTPS129"	'9.1.3.1'	'Secondary metabolism.terpenoids.terpenoid synthesis.mono-/sesquiterpene-/diterpene synthase'	'Secondary metabolism.terpenoids.terpenoid synthesis.mono-/sesquiterpene-/diterpene synthase (original description: none)'
Vitvi00g01453	0.24655	0	6.58482	0	1	NA	0.24655	3.2558	5.80803	0.560568	0.575092	NA	0.24655	0	5.88968	0	1	NA	0.24655	0	5.88968	0	1	NA	VIT_00s0266g00040	AT1G61680.1	2.6e-15	84	1-to-1	NA	AT1G61680.1	terpene synthase 14	NA	"TPS14"	ATTPS14.TERPENE SYNTHASE 14	terpene synthase 14	terpene synthase 14 (TPS14)%3B CONTAINS InterPro DOMAIN/s: Terpene synthase%2C metal-binding domain (InterPro:IPR005630)%2C Terpenoid synthase (InterPro:IPR008949)%2C Terpenoid cylases/protein prenyltransferase alpha-alpha toroid (InterPro:IPR008930)%2C Terpene synthase-like (InterPro:IPR001906)%3B BEST Arabidopsis thaliana protein match is: terpene synthase 02 (TAIR:AT4G16730.1)%3B Has 1701 Blas…	*****	PMID:9614092.gene:2195767.UniProt:Q84UV0	"VviTPS133"	'50.4.2'	'Enzyme classification.EC_4 lyases.EC_4.2 carbon-oxygen lyase'	'Probable terpene synthase 13 OS=Ricinus communis (sp|b9rxw4|tps13_ricco : 128.0) & Enzyme classification.EC_4 lyases.EC_4.2 carbon-oxygen lyase(50.4.2 : 53.4) (original description: none)'
Vitvi00g01457	0.561653	0.810113	5.48051	0.147817	0.882487	NA	0.561653	0.454063	4.99016	0.0909916	0.927499	NA	0.561653	0	5.06977	0	1	NA	0.561653	1.8613	5.02789	0.370195	0.711237	NA	VIT_00s0522g00020	AT1G61680.1	3e-58	224.2	1-to-many	AT1G61680.2	AT1G61680.1	terpene synthase 14	NA	"TPS14"	ATTPS14.TERPENE SYNTHASE 14	terpene synthase 14	terpene synthase 14 (TPS14)%3B CONTAINS InterPro DOMAIN/s: Terpene synthase%2C metal-binding domain (InterPro:IPR005630)%2C Terpenoid synthase (InterPro:IPR008949)%2C Terpenoid cylases/protein prenyltransferase alpha-alpha toroid (InterPro:IPR008930)%2C Terpene synthase-like (InterPro:IPR001906)%3B BEST Arabidopsis thaliana protein match is: terpene synthase 02 (TAIR:AT4G16730.1)%3B Has 1701 Blas…	*****	PMID:9614092.gene:2195767.UniProt:Q84UV0	"VviTPS148"	'9.1.3.1'	'Secondary metabolism.terpenoids.terpenoid synthesis.mono-/sesquiterpene-/diterpene synthase'	'Secondary metabolism.terpenoids.terpenoid synthesis.mono-/sesquiterpene-/diterpene synthase (original description: none)'
Vitvi00g01462	0.150394	-0.62113	6.57192	-0.0945128	0.924702	NA	0.150394	-2.04166	5.84444	-0.349334	0.726839	NA	0.150394	0	5.88968	0	1	NA	0.150394	0	5.88968	0	1	NA	VIT_00s0266g00070	AT1G61680.1	5e-83	307.4	1-to-1	NA	AT1G61680.1	terpene synthase 14	NA	"TPS14"	ATTPS14.TERPENE SYNTHASE 14	terpene synthase 14	terpene synthase 14 (TPS14)%3B CONTAINS InterPro DOMAIN/s: Terpene synthase%2C metal-binding domain (InterPro:IPR005630)%2C Terpenoid synthase (InterPro:IPR008949)%2C Terpenoid cylases/protein prenyltransferase alpha-alpha toroid (InterPro:IPR008930)%2C Terpene synthase-like (InterPro:IPR001906)%3B BEST Arabidopsis thaliana protein match is: terpene synthase 02 (TAIR:AT4G16730.1)%3B Has 1701 Blas…	*****	PMID:9614092.gene:2195767.UniProt:Q84UV0	"VviTPS54"	'9.1.3.1'	'Secondary metabolism.terpenoids.terpenoid synthesis.mono-/sesquiterpene-/diterpene synthase'	'Secondary metabolism.terpenoids.terpenoid synthesis.mono-/sesquiterpene-/diterpene synthase (original description: none)'
Vitvi00g01467	0.106313	-0.621161	6.57192	-0.0945174	0.924698	NA	0.106313	0	5.88922	0	1	NA	0.106313	1.97359	5.87802	0.335758	0.737054	NA	0.106313	0	5.88968	0	1	NA	VIT_00s0266g00020	AT1G61680.1	2.8e-86	318.2	1-to-many	AT1G61680.2	AT1G61680.1	terpene synthase 14	NA	"TPS14"	ATTPS14.TERPENE SYNTHASE 14	terpene synthase 14	terpene synthase 14 (TPS14)%3B CONTAINS InterPro DOMAIN/s: Terpene synthase%2C metal-binding domain (InterPro:IPR005630)%2C Terpenoid synthase (InterPro:IPR008949)%2C Terpenoid cylases/protein prenyltransferase alpha-alpha toroid (InterPro:IPR008930)%2C Terpene synthase-like (InterPro:IPR001906)%3B BEST Arabidopsis thaliana protein match is: terpene synthase 02 (TAIR:AT4G16730.1)%3B Has 1701 Blas…	*****	PMID:9614092.gene:2195767.UniProt:Q84UV0	"VviTPS64"	'9.1.3.1'	'Secondary metabolism.terpenoids.terpenoid synthesis.mono-/sesquiterpene-/diterpene synthase'	'Secondary metabolism.terpenoids.terpenoid synthesis.mono-/sesquiterpene-/diterpene synthase (original description: none)'
Vitvi00g01685	5.64113	-3.59676	1.16885	-3.07719	0.00208965	0.00779417	5.64113	-2.8008	0.920963	-3.04116	0.00235669	0.00679645	5.64113	-2.45433	0.766188	-3.2033	0.00135862	0.00396275	5.64113	-0.53733	1.20952	-0.444252	0.65686	0.742023	VIT_00s0266g00080	AT4G23160.2	1.9e-22	105.5	1-to-many	AT4G23160.3	AT4G23160.2	cysteine-rich RECEPTOR-like kinase	NA	"CRK8"	NA	cysteine-rich RLK (RECEPTOR-like protein kinase) 8	NA	NA	NA	NA	'35.1'	'not assigned.annotated'	'Retrovirus-related Pol polyprotein from transposon RE2 OS=Arabidopsis thaliana (sp|q9zt94|polr2_arath : 94.7)'
Vitvi00g01765	0.159834	-0.318442	6.5178	-0.0488574	0.961033	NA	0.159834	0	5.88922	0	1	NA	0.159834	-0.537148	5.88968	-0.0912017	0.927332	NA	0.159834	0	5.88968	0	1	NA	VIT_00s0319g00040	AT5G61530.1	2.5e-22	105.9	1-to-many	AT5G61530.3.AT5G61530.4	AT5G61530.1	small G protein family protein / RhoGAP family protein	NA	NA	NA	NA	small G protein family protein / RhoGAP family protein%3B FUNCTIONS IN: Rho GTPase activator activity%3B INVOLVED IN: signal transduction%3B LOCATED IN: intracellular%3B EXPRESSED IN: 24 plant structures%3B EXPRESSED DURING: 15 growth stages%3B CONTAINS InterPro DOMAIN/s: Rho GTPase activation protein (InterPro:IPR008936)%2C RhoGAP (InterPro:IPR000198)%3B Has 30201 Blast hits to 17322 proteins in…	****	gene:2151610.UniProt:Q3E875	NA	'35.1'	'not assigned.annotated'	'Uncharacterized Rho GTPase-activating protein At5g61530 OS=Arabidopsis thaliana (sp|q3e875|rgapx_arath : 107.0)'
Vitvi00g01766	0	NA	NA	NA	NA	NA	0	NA	NA	NA	NA	NA	0	NA	NA	NA	NA	NA	0	NA	NA	NA	NA	NA	VIT_00s0319g00050	AT5G56870.1	1.2e-08	57.4	1-to-1	NA	AT5G56870.1	beta-galactosidase 4	NA	"BGAL4"	NA	beta-galactosidase 4	beta-galactosidase 4 (BGAL4)%3B FUNCTIONS IN: beta-galactosidase activity%3B INVOLVED IN: lactose catabolic process%2C using glucoside 3-dehydrogenase%2C carbohydrate metabolic process%2C lactose catabolic process via UDP-galactose%2C lactose catabolic process%3B LOCATED IN: endomembrane system%3B EXPRESSED IN: 25 plant structures%3B EXPRESSED DURING: 12 growth stages%3B CONTAINS InterPro DOMAIN/…	****	PMID:15517348.PMID:16267099.PMID:17234672.gene:2170281.UniProt:Q9SCV8	NA	'21.3.2.2.1'	'Cell wall.pectin.rhamnogalacturonan I.modification and degradation.beta-galactosidase'	'Cell wall.pectin.rhamnogalacturonan I.modification and degradation.beta-galactosidase (original description: none)'
Vitvi00g01767	5.38487	-3.44651	1.26139	-2.7323	0.00628935	0.0196193	5.38487	-5.1636	1.37695	-3.75002	0.000176823	0.000684448	5.38487	-5.49796	1.35281	-4.0641	4.82177e-05	0.000196276	5.38487	-2.96158	1.43839	-2.05895	0.0394989	0.0759834	VIT_00s0319g00070	AT3G57060.1	3.8e-13	73.2	1-to-many	AT3G57060.2.AT3G57060.3	AT3G57060.1	binding protein	NA	NA	NA	NA	binding%3B FUNCTIONS IN: binding%3B INVOLVED IN: mitosis%2C chromosome condensation%3B LOCATED IN: nucleus%2C condensin complex%3B EXPRESSED IN: 15 plant structures%3B EXPRESSED DURING: 6 growth stages%3B CONTAINS InterPro DOMAIN/s: Non-SMC condensin subunit%2C XCAP-D2/Cnd1 (InterPro:IPR007673)%2C Armadillo-type fold (InterPro:IPR016024)%3B BEST Arabidopsis thaliana protein match is: binding (TAI…	****	gene:2080619.UniProt:F4J245	NA	'35.2'	'not assigned.not annotated'	' no hits & (original description: none)'
Vitvi00g01768	0.122744	0	6.58482	0	1	NA	0.122744	0	5.88922	0	1	NA	0.122744	0	5.88968	0	1	NA	0.122744	2.0698	5.84264	0.354259	0.723145	NA	VIT_00s0327g00010	NA	NA	NA	NA	NA	NA	NA	NA	NA	NA	NA	NA	NA	NA	NA	'35.2'	'not assigned.not annotated'	' no hits & (original description: none)'
Vitvi00g01769	0.507862	4.03848	5.34637	0.755368	0.450028	NA	0.507862	2.75992	4.82148	0.572422	0.567036	NA	0.507862	3.08272	4.82084	0.639458	0.522525	NA	0.507862	0	4.90104	0	1	NA	VIT_00s0327g00030	NA	NA	NA	NA	NA	NA	NA	NA	NA	NA	NA	NA	NA	NA	NA	'35.2'	'not assigned.not annotated'	' no hits & (original description: none)'
Vitvi00g01786	0	NA	NA	NA	NA	NA	0	NA	NA	NA	NA	NA	0	NA	NA	NA	NA	NA	0	NA	NA	NA	NA	NA	VIT_00s0342g00010	AT1G01220.1	5e-28	124	1-to-many	AT1G01220.3.AT1G01220.4.AT1G01220.7.AT1G01220.8	AT1G01220.1	L-fucokinase/GDP-L-fucose pyrophosphorylase	Encodes a bifunctional enzyme that has both L-fucokinase and GDP-L-fucose pyrophosphorylase activities. It catalyzes the two steps of the L-fucose salvage pathway for the generation of activated GDP-L-fucose. This pathway seems to be of minor importance for cell wall polysaccharide biosynthesis compared to the de novo GDP-L-fucose biosynthesis pathway in Arabidopsis.	"FKGP"	AtFKGP.Arabidopsis thaliana L-fucokinase/GDP-L-fucose pyrophosphorylase	L-fucokinase/GDP-L-fucose pyrophosphorylase	L-fucokinase/GDP-L-fucose pyrophosphorylase (FKGP)%3B FUNCTIONS IN: fucose-1-phosphate guanylyltransferase activity%2C fucokinase activity%2C ATP binding%2C galactokinase activity%3B INVOLVED IN: GDP-L-fucose salvage%3B LOCATED IN: cytoplasm%3B EXPRESSED IN: 22 plant structures%3B EXPRESSED DURING: 13 growth stages%3B CONTAINS InterPro DOMAIN/s: Mevalonate/galactokinase (InterPro:IPR006206)%2C Ri…	**	gene:2035361.UniProt:Q9LNJ9	NA	'35.1'	'not assigned.annotated'	'Bifunctional fucokinase/fucose pyrophosphorylase OS=Arabidopsis thaliana (sp|q9lnj9|fkgp_arath : 125.0)'
Vitvi00g01787	0	NA	NA	NA	NA	NA	0	NA	NA	NA	NA	NA	0	NA	NA	NA	NA	NA	0	NA	NA	NA	NA	NA	VIT_00s0342g00020	NA	NA	NA	NA	NA	NA	NA	NA	NA	NA	NA	NA	NA	NA	NA	'35.2'	'not assigned.not annotated'	' no hits & (original description: none)'
Vitvi00g01804	0.188944	2.92299	6.53174	0.447505	0.65451	NA	0.188944	1.07644	5.88922	0.182781	0.85497	NA	0.188944	1.38641	5.88968	0.235397	0.813901	NA	0.188944	0	5.88968	0	1	NA		AT3G01410.1	1.2e-06	53.1	1-to-many	AT3G01410.2	AT3G01410.1	Polynucleotidyl transferase%2C ribonuclease H-like superfamily protein	NA	NA	NA	NA	Polynucleotidyl transferase%2C ribonuclease H-like superfamily protein%3B FUNCTIONS IN: ribonuclease H activity%2C nuclease activity%2C nucleic acid binding%3B INVOLVED IN: biological_process unknown%3B LOCATED IN: cellular_component unknown%3B EXPRESSED IN: 12 plant structures%3B EXPRESSED DURING: 7 growth stages%3B CONTAINS InterPro DOMAIN/s: Polynucleotidyl transferase%2C ribonuclease H fold (…	****	gene:2096691.UniProt:F4JEB4	NA	'35.2'	'not assigned.not annotated'	' no hits & (original description: none)'
Vitvi00g01805	3.8487	4.32972	1.98718	2.17882	0.029345	0.0695513	3.8487	2.4831	1.7667	1.4055	0.159872	0.245384	3.8487	0.349734	1.58512	0.220636	0.825376	0.877544	3.8487	-0.160762	1.74569	-0.0920908	0.926626	0.952133	VIT_00s0366g00020	AT4G05200.1	4e-50	198.7	1-to-many	AT4G05200.2	AT4G05200.1	cysteine-rich RLK (RECEPTOR-like protein kinase) 25	Encodes a cysteine-rich receptor-like protein kinase.	"CRK25"	NA	cysteine-rich RLK (RECEPTOR-like protein kinase) 25	cysteine-rich RLK (RECEPTOR-like protein kinase) 25 (CRK25)%3B FUNCTIONS IN: kinase activity%3B INVOLVED IN: protein amino acid phosphorylation%3B LOCATED IN: endomembrane system%3B EXPRESSED IN: root%3B CONTAINS InterPro DOMAIN/s: Protein kinase%2C ATP binding site (InterPro:IPR017441)%2C Protein kinase%2C catalytic domain (InterPro:IPR000719)%2C Protein of unknown function DUF26 (InterPro:IPR00…	***	gene:3438468.UniProt:Q9M0X5	NA	'50.2.7'	'Enzyme classification.EC_2 transferases.EC_2.7 transferase transferring phosphorus-containing group'	'Cysteine-rich receptor-like protein kinase 25 OS=Arabidopsis thaliana (sp|q9m0x5|crk25_arath : 173.0) & Enzyme classification.EC_2 transferases.EC_2.7 transferase transferring phosphorus-containing group(50.2.7 : 57.8) (original description: none)'
Vitvi00g01806	7.15992	1.07709	0.68652	1.56892	0.116667	0.20841	7.15992	1.0952	0.765404	1.43088	0.152465	0.236326	7.15992	1.98444	0.627765	3.16112	0.00157162	0.00451711	7.15992	2.4285	0.846974	2.86727	0.00414034	0.0106296	VIT_00s0367g00010	NA	NA	NA	NA	NA	NA	NA	NA	NA	NA	NA	NA	NA	NA	NA	'35.2'	'not assigned.not annotated'	' no hits & (original description: none)'
Vitvi00g01823	3.71609	3.91111	1.17538	3.32753	0.000876207	0.00370412	3.71609	2.39245	1.37632	1.7383	0.082158	0.142388	3.71609	3.16362	1.09411	2.8915	0.00383408	0.0100261	3.71609	4.4464	1.46242	3.04043	0.00236242	0.00648119		AT5G48050.1	1.2e-09	63.5	1-to-1	NA	AT5G48050.1	Copia-like polyprotein/retrotransposon	NA	NA	NA	NA	CONTAINS InterPro DOMAIN/s: Retrotransposon gag protein (InterPro:IPR005162)%3B BEST Arabidopsis thaliana protein match is: unknown protein (TAIR:AT1G34070.1)%3B Has 1807 Blast hits to 1807 proteins in 277 species: Archae - 0%3B Bacteria - 0%3B Metazoa - 736%3B Fungi - 347%3B Plants - 385%3B Viruses - 0%3B Other Eukaryotes - 339 (source: NCBI BLink).	*	gene:2162706.UniProt:Q9FI33	NA	'35.1'	'not assigned.annotated'	'Retrovirus-related Pol polyprotein from transposon RE1 OS=Arabidopsis thaliana (sp|q94hw2|polr1_arath : 692.0)'
Vitvi00g01834	0	NA	NA	NA	NA	NA	0	NA	NA	NA	NA	NA	0	NA	NA	NA	NA	NA	0	NA	NA	NA	NA	NA	VIT_00s0396g00040	NA	NA	NA	NA	NA	NA	NA	NA	NA	NA	NA	NA	NA	NA	NA	'35.2'	'not assigned.not annotated'	' no hits & (original description: none)'
Vitvi00g01835	0	NA	NA	NA	NA	NA	0	NA	NA	NA	NA	NA	0	NA	NA	NA	NA	NA	0	NA	NA	NA	NA	NA	VIT_00s0396g00070	NA	NA	NA	NA	NA	NA	NA	NA	NA	NA	NA	NA	NA	NA	NA	'35.2'	'not assigned.not annotated'	' no hits & (original description: none)'
Vitvi00g01892	38.4984	-2.88207	0.863525	-3.33756	0.000845161	0.00359136	38.4984	-0.113717	0.779632	-0.14586	0.884032	0.918544	38.4984	1.1945	0.762675	1.5662	0.117303	0.191762	38.4984	0.999355	0.798662	1.25129	0.21083	0.304961	VIT_00s0438g00020	AT2G07671.1	6.1e-30	129.4	1-to-many	ATMG01080.1	AT2G07671.1	ATP synthase subunit C family protein	NA	NA	NA	NA	ATP synthase subunit C family protein%3B FUNCTIONS IN: hydrogen ion transmembrane transporter activity%2C ATPase activity%3B INVOLVED IN: proton transport%2C ATP synthesis coupled proton transport%3B LOCATED IN: proton-transporting ATP synthase complex%2C coupling factor F(o)%2C proton-transporting two-sector ATPase complex%2C proton-transporting domain%3B CONTAINS InterPro DOMAIN/s: ATPase%2C F0…	*****	gene:3437276.UniProt:Q304C3	NA	'2.4.6.1.3'	'Cellular respiration.oxidative phosphorylation.ATP synthase complex.membrane MF0 subcomplex.subunit c'	'Cellular respiration.oxidative phosphorylation.ATP synthase complex.membrane MF0 subcomplex.subunit c (original description: none)'
Vitvi00g01893	1.09807	-4.77667	3.42504	-1.39463	0.163127	NA	1.09807	-0.839803	3.17083	-0.264853	0.791123	0.848077	1.09807	-0.490845	3.17348	-0.154671	0.877081	0.914376	1.09807	0.836054	3.22971	0.258864	0.79574	0.853154	VIT_00s0438g00030	NA	NA	NA	NA	NA	NA	NA	NA	NA	NA	NA	NA	NA	NA	NA	'35.2'	'not assigned.not annotated'	' no hits & (original description: none)'
Vitvi00g01928	602.028	-0.373786	0.231729	-1.61303	0.106738	0.194832	602.028	-0.113536	0.20617	-0.55069	0.581846	0.675404	602.028	-0.930015	0.206301	-4.50805	6.54261e-06	3.14877e-05	602.028	-0.291893	0.206494	-1.41357	0.157489	0.240834	VIT_00s0487g00010	AT5G66900.1	1.3e-39	163.7	1-to-many	AT5G66900.2	AT5G66900.1	Disease resistance protein (CC-NBS-LRR class) family	NA	NA	NA	NA	Disease resistance protein (CC-NBS-LRR class) family%3B FUNCTIONS IN: ATP binding%3B INVOLVED IN: apoptosis%2C defense response%3B CONTAINS InterPro DOMAIN/s: NB-ARC (InterPro:IPR002182)%2C Powdery mildew resistance protein%2C RPW8 domain (InterPro:IPR008808)%2C Disease resistance protein (InterPro:IPR000767)%3B BEST Arabidopsis thaliana protein match is: Disease resistance protein (CC-NBS-LRR cl…	****	gene:2175018.UniProt:Q9FKZ1	NA	'35.1'	'not assigned.annotated'	'Probable disease resistance protein At5g66900 OS=Arabidopsis thaliana (sp|q9fkz1|drl42_arath : 239.0)'
Vitvi00g01929	5.12339	-5.24531	1.58475	-3.30986	0.000933434	0.0039092	5.12339	-1.76684	0.794554	-2.22369	0.0261691	0.0543801	5.12339	-3.39551	1.18095	-2.87524	0.00403716	0.0104944	5.12339	-3.57013	1.19351	-2.9913	0.00277794	0.00746208	VIT_00s0487g00020	AT5G66900.1	2e-17	89.4	1-to-many	AT5G66900.2.AT5G66900.3	AT5G66900.1	Disease resistance protein (CC-NBS-LRR class) family	NA	NA	NA	NA	Disease resistance protein (CC-NBS-LRR class) family%3B FUNCTIONS IN: ATP binding%3B INVOLVED IN: apoptosis%2C defense response%3B CONTAINS InterPro DOMAIN/s: NB-ARC (InterPro:IPR002182)%2C Powdery mildew resistance protein%2C RPW8 domain (InterPro:IPR008808)%2C Disease resistance protein (InterPro:IPR000767)%3B BEST Arabidopsis thaliana protein match is: Disease resistance protein (CC-NBS-LRR cl…	****	gene:2175018.UniProt:Q9FKZ1	NA	'35.1'	'not assigned.annotated'	'Probable disease resistance protein At5g66900 OS=Arabidopsis thaliana (sp|q9fkz1|drl42_arath : 85.5)'
Vitvi00g01930	381.865	2.18264	0.14325	15.2365	2.02291e-52	9.64134e-50	381.865	1.78312	0.13603	13.1083	2.95226e-39	4.63606e-37	381.865	1.55055	0.127956	12.1178	8.49651e-34	7.17634e-32	381.865	1.07722	0.13301	8.09874	5.55291e-16	1.33917e-14		AT5G66900.1	1.9e-62	241.5	1-to-many	AT5G66900.2	AT5G66900.1	Disease resistance protein (CC-NBS-LRR class) family	NA	NA	NA	NA	Disease resistance protein (CC-NBS-LRR class) family%3B FUNCTIONS IN: ATP binding%3B INVOLVED IN: apoptosis%2C defense response%3B CONTAINS InterPro DOMAIN/s: NB-ARC (InterPro:IPR002182)%2C Powdery mildew resistance protein%2C RPW8 domain (InterPro:IPR008808)%2C Disease resistance protein (InterPro:IPR000767)%3B BEST Arabidopsis thaliana protein match is: Disease resistance protein (CC-NBS-LRR cl…	****	gene:2175018.UniProt:Q9FKZ1	NA	'35.1'	'not assigned.annotated'	'Probable disease resistance protein At5g66900 OS=Arabidopsis thaliana (sp|q9fkz1|drl42_arath : 263.0)'
Vitvi00g01932	551.449	0.964253	0.359404	2.68292	0.00729826	0.0221529	551.449	0.721738	0.322993	2.23453	0.0254483	0.0531409	551.449	0.331884	0.320246	1.03634	0.300042	0.409924	551.449	0.251503	0.320638	0.784382	0.432816	0.539519	VIT_00s0490g00010	AT1G13950.1	0.00019	44.7	1-to-1	NA	AT1G13950.1	eukaryotic elongation factor 5A-1	Encodes eukaryotic translation initiation factor 5A (EIF-5A).In mammalian cells it functions as a shuttle protein that translocates mRNA from the nucleus to cytoplasmic ribosomes. Overexpression results in an increase in both primary and secondary xylem formation. In RNAi suppressed lines%2C xylem formation is reduced.	"ELF5A-1"	ATELF5A-1.EUKARYOTIC ELONGATION FACTOR 5A-1.EIF-5A.EIF5A.EUKARYOTIC ELONGATION FACTOR 5A	eukaryotic elongation factor 5A-1	eukaryotic elongation factor 5A-1 (ELF5A-1)%3B FUNCTIONS IN: ribosome binding%2C RNA binding%2C translation elongation factor activity%2C translation initiation factor activity%3B INVOLVED IN: translational initiation%2C xylem development%3B LOCATED IN: cellular_component unknown%3B EXPRESSED IN: 18 plant structures%3B EXPRESSED DURING: 11 growth stages%3B CONTAINS InterPro DOMAIN/s: Nucleic acid…	****	PMID:18304977.gene:3434600.UniProt:Q9XI91	NA	'17.4.5'	'Protein biosynthesis.translation elongation.eEF5(eIF5A) poly-P/G elongation factor'	'Protein biosynthesis.translation elongation.eEF5(eIF5A) poly-P/G elongation factor (original description: none)'
Vitvi00g01939	28.0576	-0.922352	0.779966	-1.18255	0.236986	0.359172	28.0576	0.278175	0.644391	0.431687	0.665969	0.748122	28.0576	2.55228	0.944869	2.7012	0.00690908	0.0168373	28.0576	3.59987	0.717047	5.02041	5.15606e-07	3.23797e-06	GSVIVT00011873001	AT4G35680.1	6.1e-41	166.4	1-to-1	NA	AT4G35680.1	selection/upkeep of intraepithelial T-cells protein	NA	NA	NA	NA	Arabidopsis protein of unknown function (DUF241)%3B LOCATED IN: chloroplast%3B CONTAINS InterPro DOMAIN/s: Protein of unknown function DUF241%2C plant (InterPro:IPR004320)%3B BEST Arabidopsis thaliana protein match is: unknown protein (TAIR:AT4G01590.2)%3B Has 1807 Blast hits to 1807 proteins in 277 species: Archae - 0%3B Bacteria - 0%3B Metazoa - 736%3B Fungi - 347%3B Plants - 385%3B Viruses - 0…	*	gene:2128032	NA	'35.2'	'not assigned.not annotated'	' no hits & (original description: none)'
Vitvi00g01940	5.59731	-2.01403	1.07806	-1.8682	0.061734	0.126095	5.59731	-3.92539	1.18345	-3.3169	0.000910233	0.00293051	5.59731	1.41151	1.48348	0.951485	0.341358	0.453884	5.59731	-0.23207	1.19179	-0.194724	0.845609	0.891895	VIT_00s0517g00010	AT4G35690.1	2e-32	138.3	1-to-1	NA	AT4G35690.1	hypothetical protein (DUF241)	NA	NA	NA	NA	Arabidopsis protein of unknown function (DUF241)%3B CONTAINS InterPro DOMAIN/s: Protein of unknown function DUF241%2C plant (InterPro:IPR004320)%3B BEST Arabidopsis thaliana protein match is: Arabidopsis protein of unknown function (DUF241) (TAIR:AT4G35710.1)%3B Has 1807 Blast hits to 1807 proteins in 277 species: Archae - 0%3B Bacteria - 0%3B Metazoa - 736%3B Fungi - 347%3B Plants - 385%3B Virus…	*****	gene:2127927.UniProt:O81800	NA	'35.2'	'not assigned.not annotated'	' no hits & (original description: none)'
Vitvi00g01941	17.8424	-0.426355	0.765822	-0.556729	0.577713	0.693307	17.8424	-0.00252062	0.645398	-0.00390552	0.996884	0.999444	17.8424	6.30747	1.33398	4.72831	2.26399e-06	1.19221e-05	17.8424	4.25238	0.904914	4.6992	2.61178e-06	1.42558e-05	VIT_00s0517g00020	AT2G17080.1	1.1e-37	155.2	1-to-1	NA	AT2G17080.1	hypothetical protein (DUF241)	NA	NA	NA	NA	Arabidopsis protein of unknown function (DUF241)%3B FUNCTIONS IN: molecular_function unknown%3B INVOLVED IN: biological_process unknown%3B LOCATED IN: chloroplast%3B EXPRESSED IN: root%3B CONTAINS InterPro DOMAIN/s: Protein of unknown function DUF241%2C plant (InterPro:IPR004320)%3B BEST Arabidopsis thaliana protein match is: Arabidopsis protein of unknown function (DUF241) (TAIR:AT2G17070.1)%3B …	*****	gene:2827680.UniProt:Q1PF57	NA	'35.2'	'not assigned.not annotated'	' no hits & (original description: none)'
Vitvi00g01963	0.134435	0	6.58482	0	1	NA	0.134435	1.63718	5.87667	0.278591	0.780559	NA	0.134435	0	5.88968	0	1	NA	0.134435	0.836044	5.88968	0.141951	0.887119	NA	VIT_00s0556g00020	NA	NA	NA	NA	NA	NA	NA	NA	NA	NA	NA	NA	NA	NA	NA	'35.2'	'not assigned.not annotated'	' no hits & (original description: none)'
Vitvi00g01964	9.04036	-0.624209	1.20752	-0.516936	0.605201	0.716469	9.04036	0.0418346	1.11538	0.0375069	0.970081	0.98027	9.04036	-2.64035	1.16123	-2.27376	0.0229806	0.0479848	9.04036	-2.8221	1.08838	-2.59294	0.00951588	0.0220461	VIT_00s0557g00020	AT2G32235.1	4.2e-05	49.3	1-to-1	NA	AT2G32235.1	hypothetical protein	NA	NA	NA	NA	unknown protein%3B Has 38 Blast hits to 38 proteins in 14 species: Archae - 0%3B Bacteria - 4%3B Metazoa - 11%3B Fungi - 11%3B Plants - 11%3B Viruses - 0%3B Other Eukaryotes - 1 (source: NCBI BLink).	*****	gene:504953899.UniProt:Q5S4W8	NA	'35.2'	'not assigned.not annotated'	' no hits & (original description: none)'
Vitvi00g01965	2.81571	-2.85429	1.53701	-1.85704	0.0633057	0.128694	2.81571	-2.61626	1.27008	-2.05992	0.0394064	0.0768826	2.81571	-0.0558003	1.45865	-0.0382548	0.969485	0.981705	2.81571	-0.119779	1.5384	-0.0778592	0.93794	0.960472		AT2G17080.1	2.4e-26	117.1	1-to-1	NA	AT2G17080.1	hypothetical protein (DUF241)	NA	NA	NA	NA	Arabidopsis protein of unknown function (DUF241)%3B FUNCTIONS IN: molecular_function unknown%3B INVOLVED IN: biological_process unknown%3B LOCATED IN: chloroplast%3B EXPRESSED IN: root%3B CONTAINS InterPro DOMAIN/s: Protein of unknown function DUF241%2C plant (InterPro:IPR004320)%3B BEST Arabidopsis thaliana protein match is: Arabidopsis protein of unknown function (DUF241) (TAIR:AT2G17070.1)%3B …	*****	gene:2827680.UniProt:Q1PF57	NA	'35.2'	'not assigned.not annotated'	' no hits & (original description: none)'
Vitvi00g01966	5.16875	-1.16962	1.84711	-0.633214	0.526594	0.648882	5.16875	1.04402	1.54095	0.677514	0.49808	0.600094	5.16875	0.241968	1.74496	0.138667	0.889713	0.923594	5.16875	2.81459	1.68855	1.66687	0.0955405	0.159143	VIT_00s0560g00010	AT2G17080.1	2e-31	134.4	1-to-1	NA	AT2G17080.1	hypothetical protein (DUF241)	NA	NA	NA	NA	Arabidopsis protein of unknown function (DUF241)%3B FUNCTIONS IN: molecular_function unknown%3B INVOLVED IN: biological_process unknown%3B LOCATED IN: chloroplast%3B EXPRESSED IN: root%3B CONTAINS InterPro DOMAIN/s: Protein of unknown function DUF241%2C plant (InterPro:IPR004320)%3B BEST Arabidopsis thaliana protein match is: Arabidopsis protein of unknown function (DUF241) (TAIR:AT2G17070.1)%3B …	*****	gene:2827680.UniProt:Q1PF57	NA	'35.2'	'not assigned.not annotated'	' no hits & (original description: none)'
Vitvi00g01967	1.21481	-3.60701	3.69487	-0.976222	0.328955	0.458763	1.21481	1.07645	3.44786	0.31221	0.754881	0.8196	1.21481	3.88701	3.26797	1.18943	0.234272	0.33738	1.21481	-3.33606	3.30333	-1.00991	0.31254	0.418415	VIT_00s0560g00020	AT4G35710.1	8.6e-27	118.6	1-to-1	NA	AT4G35710.1	DUF241 domain protein%2C putative (DUF241)	NA	NA	NA	NA	Arabidopsis protein of unknown function (DUF241)%3B CONTAINS InterPro DOMAIN/s: Protein of unknown function DUF241%2C plant (InterPro:IPR004320)%3B BEST Arabidopsis thaliana protein match is: Arabidopsis protein of unknown function (DUF241) (TAIR:AT4G35690.1)%3B Has 1807 Blast hits to 1807 proteins in 277 species: Archae - 0%3B Bacteria - 0%3B Metazoa - 736%3B Fungi - 347%3B Plants - 385%3B Virus…	*****	gene:2127957.UniProt:O81802	NA	'35.2'	'not assigned.not annotated'	' no hits & (original description: none)'
Vitvi00g01968	63.2259	-0.0727045	0.352786	-0.206087	0.836723	0.893	63.2259	0.103798	0.327085	0.317342	0.750984	0.816553	63.2259	0.251493	0.314014	0.800897	0.423191	0.535783	63.2259	0.133853	0.333612	0.401223	0.688256	0.767238	VIT_00s0561g00010	AT2G47960.1	3.3e-07	54.3	1-to-1	NA	AT2G47960.1	trafficking protein particle complex subunit-like protein	NA	NA	NA	NA	unknown protein%3B CONTAINS InterPro DOMAIN/s: Protein of unknown function DUF974 (InterPro:IPR010378)%3B Has 285 Blast hits to 284 proteins in 126 species: Archae - 0%3B Bacteria - 0%3B Metazoa - 150%3B Fungi - 68%3B Plants - 32%3B Viruses - 0%3B Other Eukaryotes - 35 (source: NCBI BLink).	****	gene:3437466.UniProt:O82263	NA	'35.2'	'not assigned.not annotated'	' no hits & (original description: none)'
Vitvi00g01969	134.176	0.770098	0.225219	3.41933	0.000627755	0.00277563	134.176	0.940341	0.206343	4.55718	5.18438e-06	2.82356e-05	134.176	0.9105	0.198156	4.59486	4.33042e-06	2.16189e-05	134.176	0.801719	0.205962	3.89255	9.91948e-05	0.000385383	VIT_00s0566g00010	AT5G65840.1	3.9e-16	88.6	1-to-1	NA	AT5G65840.1	Thioredoxin superfamily protein	NA	NA	NA	NA	Thioredoxin superfamily protein%3B FUNCTIONS IN: oxidoreductase activity%2C antioxidant activity%3B INVOLVED IN: biological_process unknown%3B LOCATED IN: chloroplast stroma%2C chloroplast%3B EXPRESSED IN: 22 plant structures%3B EXPRESSED DURING: 13 growth stages%3B CONTAINS InterPro DOMAIN/s: Thioredoxin fold (InterPro:IPR012335)%2C Alkyl hydroperoxide reductase/ Thiol specific antioxidant/ Mal …	****	PMID:18431481.PMID:18633119.gene:3440563.UniProt:Q8L5Y8	NA	'35.2'	'not assigned.not annotated'
Vitvi00g01970	97.8521	-0.0559405	0.291474	-0.191923	0.847803	0.901293	97.8521	-0.175695	0.265024	-0.662941	0.507368	0.608388	97.8521	-0.876954	0.254514	-3.4456	0.000569783	0.00182155	97.8521	-0.93705	0.257316	-3.64163	0.000270914	0.000949641	VIT_00s0566g00020	AT5G65840.1	2.7e-06	52	1-to-1	NA	AT5G65840.1	Thioredoxin superfamily protein	NA	NA	NA	NA	Thioredoxin superfamily protein%3B FUNCTIONS IN: oxidoreductase activity%2C antioxidant activity%3B INVOLVED IN: biological_process unknown%3B LOCATED IN: chloroplast stroma%2C chloroplast%3B EXPRESSED IN: 22 plant structures%3B EXPRESSED DURING: 13 growth stages%3B CONTAINS InterPro DOMAIN/s: Thioredoxin fold (InterPro:IPR012335)%2C Alkyl hydroperoxide reductase/ Thiol specific antioxidant/ Mal …	****	PMID:18431481.PMID:18633119.gene:3440563.UniProt:Q8L5Y8	NA	'35.2'	'not assigned.not annotated'	' no hits & (original description: none)'
Vitvi00g01974	0.0616374	0	6.58482	0	1	NA	0.0616374	1.07649	5.88922	0.18279	0.854963	NA	0.0616374	0	5.88968	0	1	NA	0.0616374	0	5.88968	0	1	NA		NA	NA	NA	NA	NA	NA	NA	NA	NA	NA	NA	NA	NA	NA	NA	'35.2'	'not assigned.not annotated'	' no hits & (original description: none)'
Vitvi00g01978	1185.47	0.106973	0.174591	0.612705	0.540071	0.660943	1185.47	-0.0497623	0.156619	-0.317728	0.750691	0.816426	1185.47	0.465349	0.156479	2.97388	0.00294058	0.00788282	1185.47	0.562943	0.157612	3.5717	0.000354674	0.00120973	VIT_00s0590g00020	NA	NA	NA	NA	NA	NA	NA	NA	NA	NA	NA	NA	NA	NA	NA	'35.2'	'not assigned.not annotated'	' no hits & (original description: none)'
Vitvi00g01994	52.2956	-2.83058	0.399366	-7.08768	1.36378e-12	3.09781e-11	52.2956	-2.42526	0.333128	-7.28027	3.33148e-13	5.787e-12	52.2956	-1.68357	0.333974	-5.04104	4.63014e-07	2.77958e-06	52.2956	-1.62058	0.344322	-4.70657	2.51923e-06	1.37864e-05		AT3G25270.1	0.00012	50.1	1-to-1	NA	AT3G25270.1	Ribonuclease H-like superfamily protein	NA	NA	NA	NA	Ribonuclease H-like superfamily protein%3B FUNCTIONS IN: nucleic acid binding%3B INVOLVED IN: biological_process unknown%3B LOCATED IN: cellular_component unknown%3B CONTAINS InterPro DOMAIN/s: Polynucleotidyl transferase%2C ribonuclease H fold (InterPro:IPR012337)%2C RNA-directed DNA polymerase (reverse transcriptase)%2C related (InterPro:IPR015706)%3B BEST Arabidopsis thaliana protein match is:…	***	gene:2090214.UniProt:Q9LSE9	NA	'35.1'	'not assigned.annotated'	'Retrovirus-related Pol polyprotein from transposon TNT 1-94 OS=Nicotiana tabacum (sp|p10978|polx_tobac : 253.0)'
Vitvi00g01996	318.111	0.967239	0.16578	5.83446	5.39654e-09	7.28179e-08	318.111	1.06176	0.151928	6.98859	2.77666e-12	4.27434e-11	318.111	0.441198	0.146219	3.01737	0.00254977	0.0069403	318.111	0.838471	0.157597	5.32037	1.03559e-07	7.34592e-07	VIT_00s0641g00010	AT5G10290.1	1.2e-66	254.2	1-to-many	AT5G10290.2	AT5G10290.1	leucine-rich repeat transmembrane protein kinase family protein	NA	NA	NA	NA	leucine-rich repeat transmembrane protein kinase family protein%3B FUNCTIONS IN: kinase activity%3B INVOLVED IN: protein amino acid phosphorylation%3B LOCATED IN: plasma membrane%3B EXPRESSED IN: 21 plant structures%3B EXPRESSED DURING: 13 growth stages%3B CONTAINS InterPro DOMAIN/s: Protein kinase%2C ATP binding site (InterPro:IPR017441)%2C Protein kinase%2C catalytic domain (InterPro:IPR000719)…	****	PMID:17317660.PMID:21075962.gene:2145406.UniProt:C0LGT1	NA	'50.2.7'	'Enzyme classification.EC_2 transferases.EC_2.7 transferase transferring phosphorus-containing group'	'LRR receptor kinase SERK2 OS=Oryza sativa subsp. japonica (sp|q6k4t4|serk4_orysj : 249.0) & Enzyme classification.EC_2 transferases.EC_2.7 transferase transferring phosphorus-containing group(50.2.7 : 53.9) (original description: none)'
Vitvi00g01997	0.360668	1.59605	5.82286	0.2741	0.784008	NA	0.360668	1.07641	5.24413	0.205261	0.837368	NA	0.360668	1.38642	5.24445	0.264359	0.791504	NA	0.360668	-1.01093	5.21294	-0.193927	0.846233	NA	VIT_00s0641g00030	NA	NA	NA	NA	NA	NA	NA	NA	NA	NA	NA	NA	NA	NA	NA	'35.2'	'not assigned.not annotated'	' no hits & (original description: none)'
Vitvi00g01998	0.151695	0	6.58482	0	1	NA	0.151695	0	5.88922	0	1	NA	0.151695	0	5.88968	0	1	NA	0.151695	0.678508	5.86644	0.115659	0.907923	NA	VIT_00s0646g00020	AT5G10290.1	1.4e-39	160.2	1-to-many	AT5G10290.2	AT5G10290.1	leucine-rich repeat transmembrane protein kinase family protein	NA	NA	NA	NA	leucine-rich repeat transmembrane protein kinase family protein%3B FUNCTIONS IN: kinase activity%3B INVOLVED IN: protein amino acid phosphorylation%3B LOCATED IN: plasma membrane%3B EXPRESSED IN: 21 plant structures%3B EXPRESSED DURING: 13 growth stages%3B CONTAINS InterPro DOMAIN/s: Protein kinase%2C ATP binding site (InterPro:IPR017441)%2C Protein kinase%2C catalytic domain (InterPro:IPR000719)…	****	PMID:17317660.PMID:21075962.gene:2145406.UniProt:C0LGT1	NA	'35.1'	'not assigned.annotated'	'LRR receptor kinase SERK2 OS=Oryza sativa subsp. japonica (sp|q6k4t4|serk4_orysj : 99.8)'
Vitvi00g01999	5628.93	0.641603	0.163686	3.91972	8.86524e-05	0.000503432	5628.93	1.05492	0.146437	7.2039	5.85123e-13	9.8569e-12	5628.93	0.0131898	0.146292	0.090161	0.928159	0.951019	5628.93	0.295685	0.146299	2.0211	0.0432695	0.0820869	VIT_00s0646g00030	AT5G10290.1	3.5e-94	345.5	1-to-many	AT5G10290.2	AT5G10290.1	leucine-rich repeat transmembrane protein kinase family protein	NA	NA	NA	NA	leucine-rich repeat transmembrane protein kinase family protein%3B FUNCTIONS IN: kinase activity%3B INVOLVED IN: protein amino acid phosphorylation%3B LOCATED IN: plasma membrane%3B EXPRESSED IN: 21 plant structures%3B EXPRESSED DURING: 13 growth stages%3B CONTAINS InterPro DOMAIN/s: Protein kinase%2C ATP binding site (InterPro:IPR017441)%2C Protein kinase%2C catalytic domain (InterPro:IPR000719)…	****	PMID:17317660.PMID:21075962.gene:2145406.UniProt:C0LGT1	NA	'50.2.7'	'Enzyme classification.EC_2 transferases.EC_2.7 transferase transferring phosphorus-containing group'	'Probable LRR receptor-like serine/threonine-protein kinase At5g10290 OS=Arabidopsis thaliana (sp|c0lgt1|y5129_arath : 233.0) & Enzyme classification.EC_2 transferases.EC_2.7 transferase transferring phosphorus-containing group(50.2.7 : 53.5) (original description: none)'
Vitvi00g02009	0.50779	1.63232	3.47898	0.469194	0.638931	NA	0.50779	1.93184	3.3557	0.57569	0.564825	NA	0.50779	-0.537155	3.40022	-0.157977	0.874475	NA	0.50779	0.836054	3.40022	0.245883	0.805773	NA	VIT_00s0671g00010	AT2G40010.1	6e-27	118.6	1-to-1	NA	AT2G40010.1	Ribosomal protein L10 family protein	NA	NA	NA	NA	Ribosomal protein L10 family protein%3B FUNCTIONS IN: structural constituent of ribosome%3B INVOLVED IN: translational elongation%2C translation%2C ribosome biogenesis%3B LOCATED IN: cytosolic ribosome%2C ribosome%3B EXPRESSED IN: 19 plant structures%3B EXPRESSED DURING: 13 growth stages%3B CONTAINS InterPro DOMAIN/s: Ribosomal protein 60S (InterPro:IPR001813)%2C Ribosomal protein L10 (InterPro:I…	****	PMID:17934214.gene:2061230.UniProt:O04204	NA	'35.1'	'not assigned.annotated'	'60S acidic ribosomal protein P0 OS=Glycine max (sp|p50346|rla0_soybn : 90.1)'
Vitvi00g02013	0	NA	NA	NA	NA	NA	0	NA	NA	NA	NA	NA	0	NA	NA	NA	NA	NA	0	NA	NA	NA	NA	NA	VIT_00s0685g00020	AT4G16380.2	0.00017	44.3	1-to-1	NA	AT4G16380.2	Heavy metal transport/detoxification superfamily protein	NA	NA	NA	NA	Heavy metal transport/detoxification superfamily protein %3B BEST Arabidopsis thaliana protein match is: Heavy metal transport/detoxification superfamily protein (TAIR:AT1G51090.1)%3B Has 3773 Blast hits to 3325 proteins in 370 species: Archae - 4%3B Bacteria - 381%3B Metazoa - 1697%3B Fungi - 490%3B Plants - 712%3B Viruses - 65%3B Other Eukaryotes - 424 (source: NCBI BLink).	****	gene:4515101863.UniProt:F4JLT1	NA	'35.2'	'not assigned.not annotated'	' no hits & (original description: none)'
Vitvi00g02019	1.11924	3.26047	2.30047	1.41731	0.156393	NA	1.11924	0.136118	2.16488	0.0628758	0.949865	0.966778	1.11924	2.73519	2.24611	1.21775	0.223319	0.324812	1.11924	1.59633	2.40319	0.664254	0.506528	0.609896	VIT_00s0706g00010	AT4G17420.1	5.9e-09	56.6	1-to-many	AT4G17420.2.AT4G17420.3	AT4G17420.1	Tryptophan RNA-binding attenuator protein-like protein	NA	NA	NA	NA	Tryptophan RNA-binding attenuator protein-like%3B CONTAINS InterPro DOMAIN/s: Protein of unknown function DUF124 (InterPro:IPR002838)%2C Tryptophan RNA-binding attenuator protein-like (InterPro:IPR016031)%3B BEST Arabidopsis thaliana protein match is: Tryptophan RNA-binding attenuator protein-like (TAIR:AT5G47420.1)%3B Has 30201 Blast hits to 17322 proteins in 780 species: Archae - 12%3B Bacteria…	****	gene:2129015.UniProt:Q84J77	NA	'35.2'	'not assigned.not annotated'	' no hits & (original description: none)'
Vitvi00g02022	32.693	0.537618	0.765335	0.70246	0.482392	0.608634	32.693	1.7011	0.698639	2.43487	0.0148971	0.0336014	32.693	0.210275	0.668726	0.314441	0.753186	0.823175	32.693	0.051672	0.687524	0.0751567	0.94009	0.961881	VIT_00s0710g00010	AT5G65280.1	5.7e-41	166.8	1-to-many	AT5G65280.2	AT5G65280.1	GCR2-like 1	Encodes a protein with reported similarity to GCR2 a putative G protein coupled receptor thought to be an ABA receptor. Loss of function mutations in GCL1 show no ABA response defects based on assays of seed germination and seedling development.GCL1 also has similarity to LANCL1 and LANCL2%2C human homologs of bacterial lanthionine synthetase.	"GCL1"	NA	GCR2-like 1	GCR2-like 1 (GCL1)%3B FUNCTIONS IN: catalytic activity%3B INVOLVED IN: response to salt stress%3B LOCATED IN: extrinsic to membrane%3B EXPRESSED IN: 23 plant structures%3B EXPRESSED DURING: 13 growth stages%3B CONTAINS InterPro DOMAIN/s: LanC-like protein%2C eukaryotic (InterPro:IPR020464)%2C Six-hairpin glycosidase-like (InterPro:IPR008928)%2C Lanthionine synthetase C-like (InterPro:IPR007822)%3…	****	PMID:11351099.gene:2171799.UniProt:Q9FJN7	NA	'35.1'	'not assigned.annotated'	'LanC-like protein GCL1 OS=Arabidopsis thaliana (sp|q9fjn7|gcl1_arath : 163.0)'
Vitvi00g02040	37.4816	-0.108444	0.440869	-0.245977	0.8057	0.87206	37.4816	1.24369	0.384349	3.23583	0.00121291	0.00377123	37.4816	-0.120433	0.383859	-0.313743	0.753717	0.823498	37.4816	1.42797	0.411661	3.4688	0.000522786	0.00170746	VIT_00s0762g00020	AT1G61610.1	2.2e-50	197.2	1-to-many	AT1G61610.2	AT1G61610.1	S-locus lectin protein kinase family protein	NA	NA	NA	NA	S-locus lectin protein kinase family protein%3B FUNCTIONS IN: in 6 functions%3B INVOLVED IN: protein amino acid phosphorylation%2C recognition of pollen%3B LOCATED IN: endomembrane system%3B EXPRESSED IN: 7 plant structures%3B EXPRESSED DURING: 6 growth stages%3B CONTAINS InterPro DOMAIN/s: Curculin-like (mannose-binding) lectin (InterPro:IPR001480)%2C Protein kinase%2C ATP binding site (InterPro…	***	gene:2200907.UniProt:Q9SY89	NA	'35.1'	'not assigned.annotated'	'G-type lectin S-receptor-like serine/threonine-protein kinase At1g11330 OS=Arabidopsis thaliana (sp|q9sxb8|y1133_arath : 199.0)'
Vitvi00g02041	309.576	-0.874355	0.315365	-2.77251	0.0055625	0.0176826	309.576	0.0855863	0.273022	0.313478	0.753917	0.818924	309.576	-0.689065	0.276695	-2.49034	0.012762	0.0287918	309.576	-0.593474	0.274611	-2.16115	0.030684	0.0611264	VIT_00s0762g00030	AT1G11350.1	2.1e-83	308.5	1-to-1	NA	AT1G11350.1	S-domain-1 13	NA	"SD1-13"	CBRLK1.CALMODULIN-BINDING RECEPTOR-LIKE PROTEIN KINASE.RKS2	S-domain-1 13	S-domain-1 13 (SD1-13)%3B CONTAINS InterPro DOMAIN/s: Curculin-like (mannose-binding) lectin (InterPro:IPR001480)%2C Apple-like (InterPro:IPR003609)%2C Protein kinase%2C ATP binding site (InterPro:IPR017441)%2C PAN-2 domain (InterPro:IPR013227)%2C Serine/threonine-protein kinase domain (InterPro:IPR002290)%2C Serine-threonine/tyrosine-protein kinase (InterPro:IPR001245)%2C Serine/threonine-protei…	****	gene:2200150.UniProt:Q9LPZ9	NA	'50.2.7'	'Enzyme classification.EC_2 transferases.EC_2.7 transferase transferring phosphorus-containing group'	'G-type lectin S-receptor-like serine/threonine-protein kinase At1g11300 OS=Arabidopsis thaliana (sp|q9sxb4|y1130_arath : 167.0) & Enzyme classification.EC_2 transferases.EC_2.7 transferase transferring phosphorus-containing group(50.2.7 : 45.7) (original description: none)'
Vitvi00g02044	31.2237	4.28038	0.47681	8.97712	2.77955e-19	1.3391e-17	31.2237	4.18344	0.576593	7.25544	4.00346e-13	6.89727e-12	31.2237	4.36187	0.501881	8.69104	3.59121e-18	9.08592e-17	31.2237	3.52133	0.54994	6.4031	1.5225e-10	1.73771e-09	VIT_00s0797g00010	AT1G43760.1	1e-33	144.8	1-to-1	NA	AT1G43760.1	DNAse I-like superfamily protein	NA	NA	NA	NA	DNAse I-like superfamily protein%3B CONTAINS InterPro DOMAIN/s: Endonuclease/exonuclease/phosphatase (InterPro:IPR005135)%2C RNA-directed DNA polymerase (reverse transcriptase)%2C related (InterPro:IPR015706)%3B BEST Arabidopsis thaliana protein match is: DNAse I-like superfamily protein (TAIR:AT1G40390.1)%3B Has 1816 Blast hits to 1744 proteins in 56 species: Archae - 0%3B Bacteria - 6%3B Metazo…	*	gene:3433966.UniProt:F4ICS8	NA	'35.2'	'not assigned.not annotated'	' no hits & (original description: none)'
Vitvi00g02047	384.38	0.660138	0.261366	2.52572	0.0115462	0.0324006	384.38	0.280654	0.234821	1.19519	0.232015	0.331533	384.38	0.567325	0.23469	2.41733	0.0156346	0.0344388	384.38	-0.115281	0.236383	-0.487689	0.62577	0.715331	VIT_00s0809g00010	AT1G23850.1	7.5e-27	119.4	1-to-1	NA	AT1G23850.1	transmembrane protein	NA	NA	NA	NA	unknown protein%3B BEST Arabidopsis thaliana protein match is: unknown protein (TAIR:AT1G23840.1)%3B Has 47 Blast hits to 40 proteins in 5 species: Archae - 0%3B Bacteria - 0%3B Metazoa - 0%3B Fungi - 0%3B Plants - 47%3B Viruses - 0%3B Other Eukaryotes - 0 (source: NCBI BLink).	*****	gene:2199831.UniProt:Q9LRA9	NA	'35.2'	'not assigned.not annotated'	' no hits & (original description: none)'
Vitvi00g02048	0	NA	NA	NA	NA	NA	0	NA	NA	NA	NA	NA	0	NA	NA	NA	NA	NA	0	NA	NA	NA	NA	NA	VIT_00s0809g00020	NA	NA	NA	NA	NA	NA	NA	NA	NA	NA	NA	NA	NA	NA	NA	'35.2'	'not assigned.not annotated'	' no hits & (original description: none)'
Vitvi00g02050	44.9157	3.48506	1.63466	2.13199	0.0330079	0.076514	44.9157	2.14688	1.44888	1.48175	0.138408	0.218819	44.9157	4.5141	1.47455	3.06135	0.00220341	0.00609244	44.9157	8.78291	1.85524	4.73412	2.20013e-06	1.21815e-05		AT1G17840.1	1.3e-67	255	1-to-1	NA	AT1G17840.1	white-brown complex-like protein	Encodes a plasma membrane-localized ATP-binding cassette transporter%2C that is required for cutin transport to the extracellular matrix.	"ABCG11"	ATWBC11.ARABIDOPSIS THALIANA WHITE-BROWN COMPLEX HOMOLOG PROTEIN 11.AtABCG11.COF1.CUTICULAR DEFECT AND ORGAN FUSION 1.DSO.DESPERADO.WBC11.white-brown complex homolog protein 11	ATP-binding cassette G11	white-brown complex homolog protein 11 (WBC11)%3B FUNCTIONS IN: ATPase activity%2C coupled to transmembrane movement of substances%2C fatty acid transporter activity%3B INVOLVED IN: cutin transport%2C fatty acid transport%3B LOCATED IN: plasma membrane%2C external side of plasma membrane%3B EXPRESSED IN: 26 plant structures%3B EXPRESSED DURING: 13 growth stages%3B CONTAINS InterPro DOMAIN/s: ATPa…	****	PMID:12972649.PMID:14730060.PMID:17317660.PMID:17727615.PMID:17951461.PMID:17989085.gene:2030897.UniProt:Q8RXN0	NA	'35.1'	'not assigned.annotated'	'ABC transporter G family member 11 OS=Arabidopsis thaliana (sp|q8rxn0|ab11g_arath : 268.0)'
Vitvi00g02051	0	NA	NA	NA	NA	NA	0	NA	NA	NA	NA	NA	0	NA	NA	NA	NA	NA	0	NA	NA	NA	NA	NA	VIT_00s0827g00010	AT5G63810.1	2.4e-10	63.2	1-to-1	NA	AT5G63810.1	beta-galactosidase 10	member of Glycoside Hydrolase Family 35	"BGAL10"	AtBGAL10.Arabidopsis thaliana beta-galactosidase 10	beta-galactosidase 10	beta-galactosidase 10 (BGAL10)%3B FUNCTIONS IN: cation binding%2C beta-galactosidase activity%2C hydrolase activity%2C hydrolyzing O-glycosyl compounds%2C catalytic activity%3B INVOLVED IN: response to karrikin%3B LOCATED IN: cell wall%2C plant-type cell wall%3B EXPRESSED IN: 25 plant structures%3B EXPRESSED DURING: 14 growth stages%3B CONTAINS InterPro DOMAIN/s: Glycoside hydrolase%2C family 35%…	*****	PMID:14595688.PMID:16267099.PMID:17526915.gene:3441089.UniProt:Q9FN08	NA	'21.3.2.2.1'	'Cell wall.pectin.rhamnogalacturonan I.modification and degradation.beta-galactosidase'	'Cell wall.pectin.rhamnogalacturonan I.modification and degradation.beta-galactosidase (original description: none)'
Vitvi00g02052	0.173692	-1.87668	6.52434	-0.287644	0.773619	NA	0.173692	-0.846983	5.88922	-0.143819	0.885643	NA	0.173692	-0.537148	5.88968	-0.0912017	0.927332	NA	0.173692	0	5.88968	0	1	NA	VIT_00s0827g00020	AT5G19760.1	2.5e-27	119.8	1-to-1	NA	AT5G19760.1	Mitochondrial substrate carrier family protein	Encodes a novel mitochondrial carrier capable of transporting both dicarboxylates (such as malate%2C oxaloacetate%2C oxoglutarate%2C and maleate) and tricarboxylates (such as citrate%2C isocitrate%2C cis-aconitate%2C and trans-aconitate).	NA	NA	NA	Mitochondrial substrate carrier family protein%3B FUNCTIONS IN: oxidative phosphorylation uncoupler activity%2C binding%3B INVOLVED IN: transport%2C mitochondrial transport%2C transmembrane transport%3B LOCATED IN: in 6 components%3B EXPRESSED IN: 27 plant structures%3B EXPRESSED DURING: 16 growth stages%3B CONTAINS InterPro DOMAIN/s: Mitochondrial carrier protein (InterPro:IPR002067)%2C Mitochon…	****	PMID:12938931.PMID:14671022.PMID:15028209.PMID:15276431.PMID:16287169.PMID:17151019.gene:2183253.UniProt:Q9C5M0	NA	'24.2.13'	'Solute transport.carrier-mediated transport.MC-type solute transporter'	'Solute transport.carrier-mediated transport.MC-type solute transporter (original description: none)'
Vitvi00g02053	0.100284	0	6.58482	0	1	NA	0.100284	0	5.88922	0	1	NA	0.100284	-2.00143	5.83125	-0.343225	0.731429	NA	0.100284	0	5.88968	0	1	NA	VIT_00s0827g00030	AT5G19760.1	8.1e-36	150.6	1-to-1	NA	AT5G19760.1	Mitochondrial substrate carrier family protein	Encodes a novel mitochondrial carrier capable of transporting both dicarboxylates (such as malate%2C oxaloacetate%2C oxoglutarate%2C and maleate) and tricarboxylates (such as citrate%2C isocitrate%2C cis-aconitate%2C and trans-aconitate).	NA	NA	NA	Mitochondrial substrate carrier family protein%3B FUNCTIONS IN: oxidative phosphorylation uncoupler activity%2C binding%3B INVOLVED IN: transport%2C mitochondrial transport%2C transmembrane transport%3B LOCATED IN: in 6 components%3B EXPRESSED IN: 27 plant structures%3B EXPRESSED DURING: 16 growth stages%3B CONTAINS InterPro DOMAIN/s: Mitochondrial carrier protein (InterPro:IPR002067)%2C Mitochon…	****	PMID:12938931.PMID:14671022.PMID:15028209.PMID:15276431.PMID:16287169.PMID:17151019.gene:2183253.UniProt:Q9C5M0	NA	'24.2.13'	'Solute transport.carrier-mediated transport.MC-type solute transporter'	'Solute transport.carrier-mediated transport.MC-type solute transporter (original description: none)'
Vitvi00g02054	0	NA	NA	NA	NA	NA	0	NA	NA	NA	NA	NA	0	NA	NA	NA	NA	NA	0	NA	NA	NA	NA	NA	VIT_00s0827g00040	AT3G26720.1	1.7e-43	173.7	1-to-many	AT3G26720.2.AT3G26720.3.AT3G26720.4.AT3G26720.5	AT3G26720.1	Glycosyl hydrolase family 38 protein	NA	NA	NA	NA	Glycosyl hydrolase family 38 protein%3B FUNCTIONS IN: in 6 functions%3B INVOLVED IN: mannose metabolic process%2C carbohydrate metabolic process%3B LOCATED IN: plasma membrane%2C vacuole%2C plant-type cell wall%3B EXPRESSED IN: 25 plant structures%3B EXPRESSED DURING: 13 growth stages%3B CONTAINS InterPro DOMAIN/s: Glycoside hydrolase-type carbohydrate-binding (InterPro:IPR011013)%2C Glycoside hy…	****	PMID:15215502.PMID:15539469.PMID:17151019.PMID:17526915.PMID:21166475.gene:2090816.UniProt:P94078	NA	'35.1'	'not assigned.annotated'	'Alpha-mannosidase At3g26720 OS=Arabidopsis thaliana (sp|p94078|mana1_arath : 167.0)'
Vitvi00g02055	0	NA	NA	NA	NA	NA	0	NA	NA	NA	NA	NA	0	NA	NA	NA	NA	NA	0	NA	NA	NA	NA	NA	VIT_00s0827g00050	AT1G77800.1	4.7e-13	73.2	1-to-many	AT1G77800.2.AT1G77800.3.AT1G77800.4.AT1G77800.5.AT1G77800.6.AT1G77800.7	AT1G77800.1	PHD finger family protein	NA	NA	NA	NA	PHD finger family protein%3B FUNCTIONS IN: zinc ion binding%3B EXPRESSED IN: 24 plant structures%3B EXPRESSED DURING: 15 growth stages%3B CONTAINS InterPro DOMAIN/s: Zinc finger%2C PHD-type%2C conserved site (InterPro:IPR019786)%2C Zinc finger%2C PHD-type (InterPro:IPR001965)%2C Zinc finger%2C FYVE/PHD-type (InterPro:IPR011011)%2C Zinc finger%2C PHD-finger (InterPro:IPR019787)%3B BEST Arabidopsis…	**	gene:2029430.UniProt:F4I8J3	NA	'35.2'	'not assigned.not annotated'	' no hits & (original description: none)'
Vitvi00g02056	0.324165	0	6.58482	0	1	NA	0.324165	-0.847012	5.88922	-0.143824	0.885639	NA	0.324165	2.20401	5.82022	0.378681	0.704924	NA	0.324165	-1.76822	5.87359	-0.301045	0.76338	NA		AT2G27110.1	3.4e-26	117.1	1-to-many	AT2G27110.2.AT2G27110.3	AT2G27110.1	FAR1-related sequence 3	NA	"FRS3"	NA	FAR1-related sequence 3	FAR1-related sequence 3 (FRS3)%3B FUNCTIONS IN: zinc ion binding%3B INVOLVED IN: response to red or far red light%3B LOCATED IN: cellular_component unknown%3B EXPRESSED IN: 22 plant structures%3B EXPRESSED DURING: 13 growth stages%3B CONTAINS InterPro DOMAIN/s: Zinc finger%2C PMZ-type (InterPro:IPR006564)%2C Zinc finger%2C SWIM-type (InterPro:IPR007527)%2C Transcription factor%2C FAR1-related (In…	****	gene:2059303.UniProt:Q9ZVC9	NA	'15.7.49'	'RNA biosynthesis.transcriptional activation.FAR1 transcription factor'	'RNA biosynthesis.transcriptional activation.FAR1 transcription factor (original description: none)'
Vitvi00g02057	0.105398	-1.24748	6.5491	-0.190481	0.848932	NA	0.105398	-0.846956	5.88922	-0.143815	0.885647	NA	0.105398	0	5.88968	0	1	NA	0.105398	0	5.88968	0	1	NA		AT4G38180.1	1.7e-62	238	1-to-1	NA	AT4G38180.1	FAR1-related sequence 5	NA	"FRS5"	NA	FAR1-related sequence 5	FAR1-related sequence 5 (FRS5)%3B FUNCTIONS IN: zinc ion binding%3B INVOLVED IN: response to red or far red light%3B LOCATED IN: cellular_component unknown%3B EXPRESSED IN: 22 plant structures%3B EXPRESSED DURING: 13 growth stages%3B CONTAINS InterPro DOMAIN/s: MULE transposase%2C conserved domain (InterPro:IPR018289)%2C Transcription factor%2C FAR1-related (InterPro:IPR004330)%2C Zinc finger%2C …	*****	gene:2121059.UniProt:Q9SZL8	NA	'15.7.49'	'RNA biosynthesis.transcriptional activation.FAR1 transcription factor'	'RNA biosynthesis.transcriptional activation.FAR1 transcription factor (original description: none)'
Vitvi00g02058	0.188763	-0.176308	6.58026	-0.0267934	0.978624	NA	0.188763	-2.11086	5.841	-0.361387	0.71781	NA	0.188763	-0.537148	5.88968	-0.0912017	0.927332	NA	0.188763	0	5.88968	0	1	NA	VIT_00s0835g00010	AT1G09130.1	1.8e-08	59.7	1-to-many	AT1G09130.2.AT1G09130.3	AT1G09130.1	ATP-dependent caseinolytic (Clp) protease/crotonase family protein	NA	NA	NA	NA	ATP-dependent caseinolytic (Clp) protease/crotonase family protein%3B FUNCTIONS IN: serine-type endopeptidase activity%3B INVOLVED IN: proteolysis%3B LOCATED IN: in 6 components%3B EXPRESSED IN: 24 plant structures%3B EXPRESSED DURING: 15 growth stages%3B CONTAINS InterPro DOMAIN/s: Peptidase S14%2C ClpP (InterPro:IPR001907)%3B BEST Arabidopsis thaliana protein match is: CLP protease proteolytic …	****	PMID:11299370.PMID:11278690.PMID:12938931.PMID:14593120.PMID:14671022.PMID:16648217.PMID:18431481.PMID:18633119.PMID:16207701.gene:2036043.UniProt:Q8L770	NA	'35.2'	'not assigned.not annotated'	' no hits & (original description: none)'
Vitvi00g02059	4.78603	-1.55987	1.23057	-1.26759	0.204944	0.322008	4.78603	-0.847711	1.0855	-0.780938	0.434839	0.541029	4.78603	0.198471	0.99298	0.199875	0.841579	0.889718	4.78603	-0.563582	1.10369	-0.510636	0.609606	0.701904	VIT_00s0841g00020	NA	NA	NA	NA	NA	NA	NA	NA	NA	NA	NA	NA	NA	NA	NA	'35.2'	'not assigned.not annotated'	' no hits & (original description: none)'
Vitvi00g02063	0	NA	NA	NA	NA	NA	0	NA	NA	NA	NA	NA	0	NA	NA	NA	NA	NA	0	NA	NA	NA	NA	NA	VIT_00s0854g00020	ATMG00660.1	6.5e-06	48.1	1-to-1	NA	ATMG00660.1	hypothetical protein	NA	"ORF149"	NA	NA	unknown protein.	*****	gene:1009022750	NA	'35.2'	'not assigned.not annotated'	' no hits & (original description: none)'
Vitvi00g02064	0	NA	NA	NA	NA	NA	0	NA	NA	NA	NA	NA	0	NA	NA	NA	NA	NA	0	NA	NA	NA	NA	NA	VIT_00s0854g00050	NA	NA	NA	NA	NA	NA	NA	NA	NA	NA	NA	NA	NA	NA	NA	'35.2'	'not assigned.not annotated'	' no hits & (original description: none)'
Vitvi00g02067	0	NA	NA	NA	NA	NA	0	NA	NA	NA	NA	NA	0	NA	NA	NA	NA	NA	0	NA	NA	NA	NA	NA	VIT_00s0866g00010	NA	NA	NA	NA	NA	NA	NA	NA	NA	NA	NA	NA	NA	NA	NA	'2.3.6.3'	'Cellular respiration.tricarboxylic acid cycle.succinate dehydrogenase complex.SDH3-type membrane-anchor component'	'Cellular respiration.tricarboxylic acid cycle.succinate dehydrogenase complex.SDH3-type membrane-anchor component (original description: none)'
Vitvi00g02072	0.403279	-3.17887	4.40744	-0.721253	0.470754	NA	0.403279	1.07647	4.05665	0.265359	0.790733	NA	0.403279	-1.42454	4.01472	-0.354829	0.722718	NA	0.403279	-1.08753	4.0568	-0.268075	0.788641	NA	VIT_00s0872g00010	NA	NA	NA	NA	NA	NA	NA	NA	NA	NA	NA	NA	NA	NA	NA	'35.2'	'not assigned.not annotated'	' no hits & (original description: none)'
Vitvi00g02075	10.5706	-1.48506	0.760496	-1.95275	0.0508492	0.108286	10.5706	-1.63926	0.72729	-2.25393	0.0242008	0.0509212	10.5706	-2.28109	0.742816	-3.07087	0.00213434	0.00592727	10.5706	-0.934006	0.675374	-1.38295	0.166681	0.252	VIT_00s0888g00010	AT5G23450.1	2e-06	52	1-to-many	AT5G23450.2.AT5G23450.3.AT5G23450.4.AT5G23450.5	AT5G23450.1	long-chain base (LCB) kinase 1	Encodes a sphingosine kinase that specifically phosphorylates D-erythro-dihydrosphingosine (DHS)%2C but not N-acetyl-DHS or D-threo-DHS. It also also phosphorylates D-erythro-sphingosine%2C trans-4%2C trans-8-sphingadienine and phytosphingosine.	"LCBK1"	ATLCBK1.long-chain base (LCB) kinase 1	long-chain base (LCB) kinase 1	long-chain base (LCB) kinase 1 (LCBK1)%3B FUNCTIONS IN: diacylglycerol kinase activity%2C D-erythro-sphingosine kinase activity%3B INVOLVED IN: activation of protein kinase C activity by G-protein coupled receptor protein signaling pathway%2C sphingolipid biosynthetic process%3B LOCATED IN: plasma membrane%3B EXPRESSED IN: 23 plant structures%3B EXPRESSED DURING: 15 growth stages%3B CONTAINS Inte…	*****	PMID:17317660.gene:2154447.UniProt:Q9LRB0	NA	'35.2'	'not assigned.not annotated'	' no hits & (original description: none)'
Vitvi00g02076	1.94367	-0.83728	2.29138	-0.365404	0.71481	0.803668	1.94367	5.02859	1.96251	2.56233	0.0103972	0.0246845	1.94367	0.116784	1.73317	0.0673815	0.946278	0.964749	1.94367	3.93998	1.98784	1.98204	0.047475	0.088868		AT3G17450.1	2.1e-52	205.7	1-to-many	AT3G17450.2	AT3G17450.1	hAT dimerization domain-containing protein	NA	NA	NA	NA	hAT dimerisation domain-containing protein%3B FUNCTIONS IN: protein dimerization activity%2C DNA binding%3B INVOLVED IN: biological_process unknown%3B LOCATED IN: cellular_component unknown%3B EXPRESSED IN: 22 plant structures%3B EXPRESSED DURING: 14 growth stages%3B CONTAINS InterPro DOMAIN/s: HAT dimerisation (InterPro:IPR008906)%2C Zinc finger%2C BED-type predicted (InterPro:IPR003656)%2C Prot…	****	gene:2093605.UniProt:Q0WQA4	NA	'35.2'	'not assigned.not annotated'	' no hits & (original description: none)'
Vitvi00g02077	64.1986	-0.859011	0.425315	-2.01971	0.0434139	0.095297	64.1986	-0.272529	0.361282	-0.754339	0.450646	0.556062	64.1986	-0.693932	0.38846	-1.78637	0.0740401	0.130591	64.1986	0.257678	0.367639	0.700901	0.483365	0.588253	VIT_00s0895g00010	NA	NA	NA	NA	NA	NA	NA	NA	NA	NA	NA	NA	NA	NA	NA	'35.2'	'not assigned.not annotated'	' no hits & (original description: none)'
Vitvi00g02082	150.75	-0.261848	0.238388	-1.09841	0.272026	0.398091	150.75	-0.591825	0.217708	-2.71843	0.00655919	0.0165702	150.75	-0.696059	0.212617	-3.27376	0.00106125	0.00317864	150.75	-0.475517	0.214288	-2.21906	0.0264828	0.0539007		AT2G33800.1	1.7e-21	104.4	1-to-1	NA	AT2G33800.1	Ribosomal protein S5 family protein	NA	"EMB3113"	NA	EMBRYO DEFECTIVE 3113	Ribosomal protein S5 family protein%3B FUNCTIONS IN: structural constituent of ribosome%2C RNA binding%3B INVOLVED IN: response to cadmium ion%2C response to cold%2C translation%3B LOCATED IN: in 8 components%3B EXPRESSED IN: 26 plant structures%3B EXPRESSED DURING: 14 growth stages%3B CONTAINS InterPro DOMAIN/s: Ribosomal protein S5%2C N-terminal (InterPro:IPR013810)%2C Double-stranded RNA-bindi…	****	PMID:11826309.PMID:14617066.PMID:14729914.PMID:15028209.PMID:16502469.PMID:17432890.PMID:18431481.PMID:16207701.gene:2057644.UniProt:P93014	NA	'35.2'	'not assigned.not annotated'	' no hits & (original description: none)'
Vitvi00g02084	60.8806	5.71738	0.562477	10.1647	2.8513e-24	2.16196e-22	60.8806	5.57698	0.621355	8.97551	2.82032e-19	9.3296e-18	60.8806	8.58392	1.2299	6.97936	2.96527e-12	3.94199e-11	60.8806	4.31337	0.51737	8.33712	7.61219e-17	2.00574e-15	VIT_00s0922g00010	NA	NA	NA	NA	NA	NA	NA	NA	NA	NA	NA	NA	NA	NA	NA	'35.2'	'not assigned.not annotated'	' no hits & (original description: none)'
Vitvi00g02085	17.3322	-3.07823	1.35805	-2.26666	0.0234113	0.0576427	17.3322	-2.46421	1.17313	-2.10055	0.0356807	0.0705412	17.3322	-1.33158	1.17144	-1.1367	0.255664	0.361446	17.3322	-2.39372	1.20866	-1.98048	0.0476496	0.0891399		NA	NA	NA	NA	NA	NA	NA	NA	NA	NA	NA	NA	NA	NA	NA	'35.2'	'not assigned.not annotated'	' no hits & (original description: none)'
Vitvi00g02088	72.4057	-2.36538	0.597741	-3.9572	7.58337e-05	0.000436961	72.4057	1.80687	0.468556	3.85624	0.000115142	0.000466004	72.4057	-0.31425	0.489623	-0.64182	0.52099	0.6289	72.4057	0.359081	0.460591	0.77961	0.435621	0.542224	VIT_00s0934g00010	AT3G05890.1	2.9e-07	52	1-to-1	NA	AT3G05890.1	Low temperature and salt responsive protein family	NA	"RCI2B"	NA	RARE-COLD-INDUCIBLE 2B	RARE-COLD-INDUCIBLE 2B (RCI2B)%3B CONTAINS InterPro DOMAIN/s: Uncharacterised protein family UPF0057 (InterPro:IPR000612)%3B BEST Arabidopsis thaliana protein match is: Low temperature and salt responsive protein family (TAIR:AT3G05880.1)%3B Has 1391 Blast hits to 1391 proteins in 471 species: Archae - 0%3B Bacteria - 653%3B Metazoa - 37%3B Fungi - 280%3B Plants - 382%3B Viruses - 0%3B Other Euka…	*****	gene:3697741.UniProt:Q9ZNS6	NA	'35.2'	'not assigned.not annotated'	' no hits & (original description: none)'
Vitvi00g02089	0.225891	1.84966	6.46804	0.285969	0.774902	NA	0.225891	1.07641	5.88922	0.182776	0.854973	NA	0.225891	0	5.88968	0	1	NA	0.225891	0	5.88968	0	1	NA	VIT_00s0947g00020	NA	NA	NA	NA	NA	NA	NA	NA	NA	NA	NA	NA	NA	NA	NA	'35.2'	'not assigned.not annotated'	' no hits & (original description: none)'
Vitvi00g02096	1.01701	-4.12735	3.5934	-1.14859	0.250724	NA	1.01701	-4.1422	3.1864	-1.29996	0.193614	0.286427	1.01701	-0.537155	3.3675	-0.159511	0.873266	0.911613	1.01701	0	3.3675	0	1	1	GSVIVT00011580001	AT3G51400.1	1.1e-10	64.7	1-to-1	NA	AT3G51400.1	hypothetical protein (DUF241)	NA	NA	NA	NA	Arabidopsis protein of unknown function (DUF241)%3B CONTAINS InterPro DOMAIN/s: Protein of unknown function DUF241%2C plant (InterPro:IPR004320)%3B BEST Arabidopsis thaliana protein match is: Arabidopsis protein of unknown function (DUF241) (TAIR:AT4G35720.1)%3B Has 444 Blast hits to 436 proteins in 12 species: Archae - 0%3B Bacteria - 0%3B Metazoa - 0%3B Fungi - 0%3B Plants - 444%3B Viruses - 0%…	*****	gene:2081799.UniProt:Q9SD09	NA	'35.2'	'not assigned.not annotated'	' no hits & (original description: none)'
Vitvi00g02097	40.2968	-1.96133	0.712491	-2.75278	0.00590908	0.0186093	40.2968	-1.24007	0.624593	-1.98541	0.0470992	0.0891787	40.2968	0.525065	0.629149	0.834563	0.403964	0.517222	40.2968	-0.169998	0.659857	-0.257629	0.796693	0.853881	VIT_00s0976g00010	AT4G35720.1	6.2e-42	169.5	1-to-1	NA	AT4G35720.1	DUF241 domain protein%2C putative (DUF241)	NA	NA	NA	NA	Arabidopsis protein of unknown function (DUF241)%3B EXPRESSED IN: 6 plant structures%3B EXPRESSED DURING: 4 anthesis%2C C globular stage%3B CONTAINS InterPro DOMAIN/s: Protein of unknown function DUF241%2C plant (InterPro:IPR004320)%3B BEST Arabidopsis thaliana protein match is: Arabidopsis protein of unknown function (DUF241) (TAIR:AT4G35690.1)%3B Has 1807 Blast hits to 1807 proteins in 277 spec…	*****	gene:2127972.UniProt:O81803	NA	'35.2'	'not assigned.not annotated'	' no hits & (original description: none)'
Vitvi00g02098	399.011	-0.511704	0.187703	-2.72614	0.00640808	0.0199547	399.011	-0.402318	0.167389	-2.40349	0.0162393	0.0361721	399.011	-0.487554	0.166346	-2.93097	0.00337903	0.00894663	399.011	-0.492159	0.168711	-2.91717	0.00353222	0.00924114	VIT_00s0986g00010	AT1G52825.1	2.1e-08	58.2	1-to-many	AT1G52825.2.AT4G14615.1	AT1G52825.1	sporulation-specific protein	NA	NA	NA	NA	unknown protein%3B FUNCTIONS IN: molecular_function unknown%3B INVOLVED IN: biological_process unknown%3B LOCATED IN: endomembrane system%3B CONTAINS InterPro DOMAIN/s: Protein of unknown function DUF2346 (InterPro:IPR018625)%3B BEST Arabidopsis thaliana protein match is: unknown protein (TAIR:AT4G14615.1)%3B Has 52 Blast hits to 49 proteins in 19 species: Archae - 0%3B Bacteria - 0%3B Metazoa - …	*****	gene:1005715697.UniProt:Q8GXZ7	NA	'35.2'	'not assigned.not annotated'	' no hits & (original description: none)'
Vitvi00g02099	52.3847	-0.502485	0.361968	-1.3882	0.165075	0.272184	52.3847	-0.551507	0.325662	-1.6935	0.090361	0.153948	52.3847	0.716319	0.307614	2.32863	0.0198787	0.042375	52.3847	0.938112	0.311779	3.00891	0.0026219	0.00709947	VIT_00s0988g00020	AT5G65880.1	2.8e-07	54.3	1-to-1	NA	AT5G65880.1	transmembrane protein	NA	NA	NA	NA	unknown protein%3B FUNCTIONS IN: molecular_function unknown%3B INVOLVED IN: biological_process unknown%3B LOCATED IN: endomembrane system%3B EXPRESSED IN: 21 plant structures%3B EXPRESSED DURING: 13 growth stages%3B Has 1807 Blast hits to 1807 proteins in 277 species: Archae - 0%3B Bacteria - 0%3B Metazoa - 736%3B Fungi - 347%3B Plants - 385%3B Viruses - 0%3B Other Eukaryotes - 339 (source: NCBI …	*****	gene:2152088.UniProt:Q9FHP2	NA	'35.2'	'not assigned.not annotated'	' no hits & (original description: none)'
Vitvi00g02102	562.245	0.143144	0.276652	0.517416	0.604866	0.716232	562.245	0.23761	0.247242	0.961043	0.33653	0.443627	562.245	0.823587	0.247657	3.32552	0.000882543	0.00269388	562.245	0.661881	0.248213	2.66659	0.00766253	0.0182395	VIT_00s1002g00020	AT4G35780.1	7.5e-24	109	1-to-1	NA	AT4G35780.1	ACT-like protein tyrosine kinase family protein	NA	"STY17"	NA	serine/threonine/tyrosine kinase 17	ACT-like protein tyrosine kinase family protein%3B FUNCTIONS IN: protein serine/threonine/tyrosine kinase activity%2C protein kinase activity%3B INVOLVED IN: protein amino acid phosphorylation%2C metabolic process%3B EXPRESSED IN: 23 plant structures%3B EXPRESSED DURING: 13 growth stages%3B CONTAINS InterPro DOMAIN/s: Protein kinase%2C catalytic domain (InterPro:IPR000719)%2C Amino acid-binding A…	****	gene:3439158.UniProt:Q8RWL6	NA	'50.2.7'	'Enzyme classification.EC_2 transferases.EC_2.7 transferase transferring phosphorus-containing group'	'Serine/threonine-protein kinase STY17 OS=Arabidopsis thaliana (sp|q8rwl6|sty17_arath : 108.0) & Enzyme classification.EC_2 transferases.EC_2.7 transferase transferring phosphorus-containing group(50.2.7 : 51.4) (original description: none)'
Vitvi00g02106	298.465	0.457469	0.201053	2.27537	0.022884	0.0566423	298.465	0.468796	0.181398	2.58435	0.00975635	0.0233312	298.465	0.580144	0.17877	3.2452	0.00117369	0.00347409	298.465	0.413044	0.179215	2.30474	0.0211812	0.0443762	VIT_00s1034g00010	NA	NA	NA	NA	NA	NA	NA	NA	NA	NA	NA	NA	NA	NA	NA	'35.2'	'not assigned.not annotated'	' no hits & (original description: none)'
Vitvi00g02111	398.298	0.129589	0.17765	0.729463	0.465719	0.592979	398.298	-0.25491	0.161246	-1.58087	0.113907	0.186549	398.298	0.844246	0.159415	5.2959	1.18432e-07	7.86089e-07	398.298	0.0526964	0.16072	0.327877	0.743005	0.810939	VIT_00s1194g00020	NA	NA	NA	NA	NA	NA	NA	NA	NA	NA	NA	NA	NA	NA	NA	'35.2'	'not assigned.not annotated'	' no hits & (original description: none)'
Vitvi00g02112	0.471777	-0.963214	4.58315	-0.210164	0.83354	NA	0.471777	2.54719	4.04358	0.629936	0.528737	NA	0.471777	0.424635	4.12625	0.102911	0.918034	NA	0.471777	-2.80871	4.02879	-0.697161	0.485702	NA	VIT_00s1209g00010	AT4G28390.1	4.1e-41	166.4	1-to-many	AT4G28390.2	AT4G28390.1	ADP/ATP carrier 3	Encodes a mitochondrial ADP/ATP carrier protein. Shown in heterologous systems to be located in the plasma membrane. Has comparable affinity for ADP and ATP (in E.coli).	"AAC3"	ATAAC3	ADP/ATP carrier 3	ADP/ATP carrier 3 (AAC3)%3B FUNCTIONS IN: binding%2C ATP:ADP antiporter activity%3B INVOLVED IN: transport%2C mitochondrial transport%2C purine nucleotide transport%3B LOCATED IN: mitochondrion%2C mitochondrial inner membrane%2C membrane%2C chloroplast envelope%3B EXPRESSED IN: 23 plant structures%3B EXPRESSED DURING: 14 growth stages%3B CONTAINS InterPro DOMAIN/s: Mitochondrial carrier protein (…	****	PMID:12938931.PMID:14671022.PMID:16618929.PMID:17432890.gene:2121362.UniProt:O49447	NA	'24.2.13'	'Solute transport.carrier-mediated transport.MC-type solute transporter'	'Solute transport.carrier-mediated transport.MC-type solute transporter (original description: none)'
Vitvi00g02116	217.666	-1.55519	0.392588	-3.96137	7.45195e-05	0.000430131	217.666	-1.90223	0.355161	-5.35597	8.50977e-08	6.48594e-07	217.666	-2.13279	0.355777	-5.99473	2.03828e-09	1.79704e-08	217.666	-3.25168	0.364457	-8.92198	4.58036e-19	1.52813e-17	VIT_00s1213g00010	AT1G55850.1	2.5e-58	226.1	1-to-1	NA	AT1G55850.1	cellulose synthase like E1	encodes a protein similar to cellulose synthase	"CSLE1"	ATCSLE1	cellulose synthase like E1	cellulose synthase like E1 (CSLE1)%3B FUNCTIONS IN: cellulose synthase activity%2C transferase activity%2C transferring glycosyl groups%3B INVOLVED IN: plant-type cell wall biogenesis%2C cellulose biosynthetic process%2C polysaccharide biosynthetic process%3B LOCATED IN: endoplasmic reticulum%2C plasma membrane%3B EXPRESSED IN: 24 plant structures%3B EXPRESSED DURING: 13 growth stages%3B CONTAINS…	****	PMID:15647349.PMID:16618929.PMID:17317660.gene:2012049.UniProt:Q8VZK9	NA	'35.1'	'not assigned.annotated'	'Cellulose synthase-like protein E2 OS=Oryza sativa subsp. japonica (sp|q0dxz1|csle2_orysj : 207.0)'
Vitvi00g02117	0.991182	0.0211656	2.36727	0.00894092	0.992866	NA	0.991182	2.46818	2.35042	1.0501	0.293673	0.399161	0.991182	-0.980389	2.42299	-0.404619	0.685758	0.769239	0.991182	0.70327	2.49628	0.281727	0.778153	0.839708	VIT_00s1213g00020	AT1G55850.1	2.8e-18	92.4	1-to-1	NA	AT1G55850.1	cellulose synthase like E1	encodes a protein similar to cellulose synthase	"CSLE1"	ATCSLE1	cellulose synthase like E1	cellulose synthase like E1 (CSLE1)%3B FUNCTIONS IN: cellulose synthase activity%2C transferase activity%2C transferring glycosyl groups%3B INVOLVED IN: plant-type cell wall biogenesis%2C cellulose biosynthetic process%2C polysaccharide biosynthetic process%3B LOCATED IN: endoplasmic reticulum%2C plasma membrane%3B EXPRESSED IN: 24 plant structures%3B EXPRESSED DURING: 13 growth stages%3B CONTAINS…	****	PMID:15647349.PMID:16618929.PMID:17317660.gene:2012049.UniProt:Q8VZK9	NA	'35.1'	'not assigned.annotated'	'Cellulose synthase-like protein E6 OS=Oryza sativa subsp. japonica (sp|q651x6|csle6_orysj : 97.4)'
Vitvi00g02120	7.29928	-1.75352	0.775503	-2.26113	0.0237509	0.0583176	7.29928	-3.28634	0.91028	-3.61026	0.000305895	0.0011128	7.29928	-0.91728	0.706598	-1.29816	0.194231	0.289699	7.29928	0.450708	0.726599	0.620298	0.535061	0.636068	VIT_00s1221g00010	NA	NA	NA	NA	NA	NA	NA	NA	NA	NA	NA	NA	NA	NA	NA	'35.2'	'not assigned.not annotated'	' no hits & (original description: none)'
Vitvi00g02136	0	NA	NA	NA	NA	NA	0	NA	NA	NA	NA	NA	0	NA	NA	NA	NA	NA	0	NA	NA	NA	NA	NA	VIT_00s1283g00010	AT2G20320.1	0.00069	41.6	1-to-many	AT2G20320.2	AT2G20320.1	DENN (AEX-3) domain-containing protein	NA	NA	NA	NA	DENN (AEX-3) domain-containing protein%3B CONTAINS InterPro DOMAIN/s: uDENN (InterPro:IPR005113)%2C dDENN (InterPro:IPR005112)%2C DENN (InterPro:IPR001194)%3B BEST Arabidopsis thaliana protein match is: DENN (AEX-3) domain-containing protein (TAIR:AT5G35560.1)%3B Has 1567 Blast hits to 1546 proteins in 147 species: Archae - 0%3B Bacteria - 2%3B Metazoa - 1072%3B Fungi - 78%3B Plants - 117%3B Viru…	****	gene:2038961.UniProt:F4IUH2	NA	'35.2'	'not assigned.not annotated'	' no hits & (original description: none)'
Vitvi00g02138	0.874566	-3.54311	4.88078	-0.725931	0.467881	NA	0.874566	-3.17669	4.36134	-0.728376	0.466384	0.570729	0.874566	-3.55832	4.34385	-0.819161	0.412694	0.525516	0.874566	0	4.47412	0	1	1		NA	NA	NA	NA	NA	NA	NA	NA	NA	NA	NA	NA	NA	NA	NA	'35.2'	'not assigned.not annotated'	' no hits & (original description: none)'
Vitvi00g02139	2.07947	-4.67945	2.52869	-1.85054	0.0642352	0.130207	2.07947	-4.47832	2.22007	-2.0172	0.0436745	0.0837036	2.07947	-4.79753	2.20703	-2.17375	0.0297238	0.0599906	2.07947	-1.08753	2.4814	-0.438273	0.661189	0.745433		NA	NA	NA	NA	NA	NA	NA	NA	NA	NA	NA	NA	NA	NA	NA	'35.1'	'not assigned.annotated'	'RNA-directed DNA polymerase homolog OS=Oenothera berteroana (sp|p31843|rrpo_oenbe : 94.4)'
Vitvi00g02141	473.938	0.651556	0.154643	4.2133	2.51669e-05	0.000164052	473.938	0.764908	0.139741	5.47376	4.40593e-08	3.53562e-07	473.938	0.155897	0.136214	1.14449	0.252419	0.357854	473.938	-0.0903775	0.136719	-0.661047	0.508582	0.611723		AT5G65840.1	3.3e-11	69.7	1-to-1	NA	AT5G65840.1	Thioredoxin superfamily protein	NA	NA	NA	NA	Thioredoxin superfamily protein%3B FUNCTIONS IN: oxidoreductase activity%2C antioxidant activity%3B INVOLVED IN: biological_process unknown%3B LOCATED IN: chloroplast stroma%2C chloroplast%3B EXPRESSED IN: 22 plant structures%3B EXPRESSED DURING: 13 growth stages%3B CONTAINS InterPro DOMAIN/s: Thioredoxin fold (InterPro:IPR012335)%2C Alkyl hydroperoxide reductase/ Thiol specific antioxidant/ Mal …	****	PMID:18431481.PMID:18633119.gene:3440563.UniProt:Q8L5Y8	NA	'35.2'	'not assigned.not annotated'	' no hits & (original description: none)'
Vitvi00g02142	42.3484	0.539739	0.264191	2.04298	0.041054	0.0910454	42.3484	0.702514	0.263823	2.66283	0.00774872	0.0191273	42.3484	0.559232	0.236623	2.36338	0.0181089	0.0391245	42.3484	0.68425	0.265645	2.57581	0.0100006	0.0230071	VIT_00s1308g00020	AT5G65840.1	1.4e-17	88.6	1-to-1	NA	AT5G65840.1	Thioredoxin superfamily protein	NA	NA	NA	NA	Thioredoxin superfamily protein%3B FUNCTIONS IN: oxidoreductase activity%2C antioxidant activity%3B INVOLVED IN: biological_process unknown%3B LOCATED IN: chloroplast stroma%2C chloroplast%3B EXPRESSED IN: 22 plant structures%3B EXPRESSED DURING: 13 growth stages%3B CONTAINS InterPro DOMAIN/s: Thioredoxin fold (InterPro:IPR012335)%2C Alkyl hydroperoxide reductase/ Thiol specific antioxidant/ Mal …	****	PMID:18431481.PMID:18633119.gene:3440563.UniProt:Q8L5Y8	NA	'35.2'	'not assigned.not annotated'	' no hits & (original description: none)'
Vitvi00g02146	380.064	0.692865	0.332434	2.08422	0.0371406	0.0839785	380.064	1.52557	0.295666	5.15977	2.47258e-07	1.73455e-06	380.064	0.662836	0.296914	2.23242	0.0255873	0.0526298	380.064	0.268854	0.291602	0.921989	0.356534	0.463747	VIT_00s1328g00020	AT3G49780.1	3.7e-12	70.1	1-to-1	NA	AT3G49780.1	phytosulfokine 4 precursor	Phytosulfokine 3 precursor%2C coding for a unique plant peptide growth factor. Plants overexpressing this gene (under a 35S promoter)%2C develop normal cotyledons and hypocotyls but their growth%2C in particular that of their roots%2C was faster than that of wildtype.	"PSK4"	ATPSK3 (FORMER SYMBOL).ATPSK4.phytosulfokine 4 precursor	phytosulfokine 4 precursor	phytosulfokine 4 precursor (PSK4)%3B FUNCTIONS IN: growth factor activity%3B INVOLVED IN: cell proliferation%2C cell differentiation%2C response to wounding%2C organ morphogenesis%3B LOCATED IN: extracellular matrix%3B EXPRESSED IN: 25 plant structures%3B EXPRESSED DURING: 10 growth stages%3B CONTAINS InterPro DOMAIN/s: Phytosulfokine (InterPro:IPR009438)%3B BEST Arabidopsis thaliana protein matc…	*****	PMID:18643977.gene:2097344.UniProt:Q9M2Y0	NA	'11.10.1.2.1'	'Phytohormones.signalling peptides.NCRP (non-cysteine-rich-peptide) category.phytosulfokine family.PSK precursor polypeptide'	'Phytohormones.signalling peptides.NCRP (non-cysteine-rich-peptide) category.phytosulfokine family.PSK precursor polypeptide (original description: none)'
Vitvi00g02147	0.0344111	0	6.58482	0	1	NA	0.0344111	0	5.88922	0	1	NA	0.0344111	-0.537148	5.88968	-0.0912017	0.927332	NA	0.0344111	0	5.88968	0	1	NA	VIT_00s1331g00010	NA	NA	NA	NA	NA	NA	NA	NA	NA	NA	NA	NA	NA	NA	NA	'35.2'	'not assigned.not annotated'	' no hits & (original description: none)'
Vitvi00g02150	0.679844	-3.33314	4.30618	-0.774037	0.438909	NA	0.679844	0	3.97117	0	1	NA	0.679844	1.49067	3.81058	0.391192	0.695655	0.777067	0.679844	2.21979	3.89043	0.570577	0.568286	NA	VIT_00s1348g00010	AT5G47380.1	1.8e-07	56.2	1-to-many	AT5G47380.2.AT5G47380.3.AT5G47380.4.AT5G47380.5	AT5G47380.1	electron transporter%2C putative (Protein of unknown function%2C DUF547)	NA	NA	NA	NA	Protein of unknown function%2C DUF547%3B FUNCTIONS IN: molecular_function unknown%3B INVOLVED IN: biological_process unknown%3B LOCATED IN: cellular_component unknown%3B EXPRESSED IN: 13 plant structures%3B EXPRESSED DURING: 8 growth stages%3B CONTAINS InterPro DOMAIN/s: Protein of unknown function DUF547 (InterPro:IPR006869)%3B BEST Arabidopsis thaliana protein match is: Protein of unknown funct…	**	gene:2171498.UniProt:F4JX46	NA	'35.2'	'not assigned.not annotated'	' no hits & (original description: none)'
Vitvi00g02156	102.568	-0.382051	0.265074	-1.4413	0.1495	0.252361	102.568	-0.249003	0.240357	-1.03597	0.300216	0.406234	102.568	-0.552429	0.237381	-2.32718	0.0199557	0.0425198	102.568	-0.477545	0.24164	-1.97627	0.0481243	0.0898742	VIT_00s1355g00010	AT4G17040.1	3.2e-15	82.4	1-to-1	NA	AT4G17040.1	CLP protease R subunit 4	HON5 (At4g17040) encodes the ClpR4 subunit of the chloroplast-localized Clp protease complex. hon mutations disturb plastid protein homeostasis%2C thereby activating plastid signaling and inducing stress acclimatization.	"CLPR4"	HON5.happy on norflurazon 5	CLP protease R subunit 4	CLP protease R subunit 4 (CLPR4)%3B FUNCTIONS IN: serine-type endopeptidase activity%3B INVOLVED IN: proteolysis%3B LOCATED IN: plastid stroma%2C chloroplast%2C chloroplast stroma%2C chloroplast envelope%3B EXPRESSED IN: 22 plant structures%3B EXPRESSED DURING: 13 growth stages%3B CONTAINS InterPro DOMAIN/s: Peptidase S14%2C ClpP (InterPro:IPR001907)%3B BEST Arabidopsis thaliana protein match is:…	****	PMID:11299370.PMID:11278690.PMID:12938931.PMID:14593120.PMID:18431481.PMID:18633119.PMID:16207701.gene:2130448.UniProt:Q8LB10	NA	'35.2'	'not assigned.not annotated'	' no hits & (original description: none)'
Vitvi00g02157	28.0851	0.140697	1.66094	0.0847095	0.932492	0.959231	28.0851	-2.65322	1.5432	-1.7193	0.0855589	0.147171	28.0851	-1.84819	1.44519	-1.27886	0.200948	0.298016	28.0851	-2.44805	1.44589	-1.69311	0.0904352	0.151956	VIT_00s1355g00020	AT4G17030.1	1.1e-09	62.4	1-to-1	NA	AT4G17030.1	expansin-like B1	Encodes EXLB1 (expansin-like B1)%2C a member of the expansin family.	"EXLB1"	AT-EXPR.ATEXLB1.expansin-like B1.ATEXPR1.ATHEXP BETA 3.1.EXPR	expansin-like B1	expansin-like B1 (EXLB1)%3B INVOLVED IN: sexual reproduction%2C unidimensional cell growth%2C plant-type cell wall loosening%3B LOCATED IN: endomembrane system%2C extracellular region%3B EXPRESSED IN: 19 plant structures%3B EXPRESSED DURING: 9 growth stages%3B CONTAINS InterPro DOMAIN/s: Pollen allergen%2C N-terminal (InterPro:IPR014734)%2C Rare lipoprotein A (InterPro:IPR005132)%2C Pollen allerg…	*****	PMID:18296723.gene:2130443.UniProt:O23547	NA	'35.2'	'not assigned.not annotated'	' no hits & (original description: none)'
Vitvi00g02158	8.4021	0.779426	0.922576	0.844837	0.398202	0.529442	8.4021	2.0626	0.855673	2.4105	0.0159307	0.0355892	8.4021	-0.915416	0.805186	-1.1369	0.25558	0.361364	8.4021	1.93446	0.845387	2.28825	0.022123	0.0460739		AT3G01410.1	5e-10	64.7	1-to-many	AT3G01410.2	AT3G01410.1	Polynucleotidyl transferase%2C ribonuclease H-like superfamily protein	NA	NA	NA	NA	Polynucleotidyl transferase%2C ribonuclease H-like superfamily protein%3B FUNCTIONS IN: ribonuclease H activity%2C nuclease activity%2C nucleic acid binding%3B INVOLVED IN: biological_process unknown%3B LOCATED IN: cellular_component unknown%3B EXPRESSED IN: 12 plant structures%3B EXPRESSED DURING: 7 growth stages%3B CONTAINS InterPro DOMAIN/s: Polynucleotidyl transferase%2C ribonuclease H fold (…	****	gene:2096691.UniProt:F4JEB4	NA	'35.2'	'not assigned.not annotated'	' no hits & (original description: none)'
Vitvi00g02161	36.8373	0.963742	0.408769	2.35767	0.0183899	0.0473863	36.8373	0.299662	0.406367	0.737417	0.460869	0.565663	36.8373	0.0339695	0.335054	0.101385	0.919245	0.944759	36.8373	-0.943025	0.36638	-2.5739	0.0100559	0.0231286		AT2G22790.1	1.1e-47	189.9	1-to-1	NA	AT2G22790.1	hypothetical protein	NA	NA	NA	NA	unknown protein%3B BEST Arabidopsis thaliana protein match is: unknown protein (TAIR:AT5G67020.1)%3B Has 111 Blast hits to 111 proteins in 33 species: Archae - 0%3B Bacteria - 44%3B Metazoa - 0%3B Fungi - 0%3B Plants - 67%3B Viruses - 0%3B Other Eukaryotes - 0 (source: NCBI BLink).	*****	gene:2062244.UniProt:O82400	NA	'35.2'	'not assigned.not annotated'	' no hits & (original description: none)'
Vitvi00g02165	277.06	-0.170312	0.166873	-1.02061	0.30744	0.436466	277.06	-0.419338	0.153837	-2.72586	0.00641349	0.0162577	277.06	0.0595415	0.147973	0.402382	0.687403	0.770281	277.06	0.0663688	0.15486	0.428572	0.668235	0.751181	VIT_00s1390g00010	AT4G34910.1	3.6e-39	162.2	1-to-1	NA	AT4G34910.1	P-loop containing nucleoside triphosphate hydrolases superfamily protein	NA	NA	NA	NA	P-loop containing nucleoside triphosphate hydrolases superfamily protein%3B FUNCTIONS IN: helicase activity%2C ATP binding%2C nucleic acid binding%2C ATP-dependent helicase activity%3B LOCATED IN: cellular_component unknown%3B EXPRESSED IN: 19 plant structures%3B EXPRESSED DURING: 11 growth stages%3B CONTAINS InterPro DOMAIN/s: RNA helicase%2C DEAD-box type%2C Q motif (InterPro:IPR014014)%2C DNA/…	****	gene:2116919.UniProt:Q9SW44	NA	'35.1'	'not assigned.annotated'	'DEAD-box ATP-dependent RNA helicase 16 OS=Arabidopsis thaliana (sp|q9sw44|rh16_arath : 159.0)'
Vitvi00g02170	2.93441	1.94241	1.73555	1.11919	0.263061	0.388722	2.93441	0.941449	1.53389	0.613766	0.53937	0.637811	2.93441	-1.54925	1.66494	-0.930513	0.352106	0.465165	2.93441	2.22641	2.04033	1.0912	0.275184	0.377133		NA	NA	NA	NA	NA	NA	NA	NA	NA	NA	NA	NA	NA	NA	NA	'35.2'	'not assigned.not annotated'	' no hits & (original description: none)'
Vitvi00g02171	0.0346053	0	6.58482	0	1	NA	0.0346053	0	5.88922	0	1	NA	0.0346053	1.38641	5.88968	0.235397	0.813901	NA	0.0346053	0	5.88968	0	1	NA	VIT_00s1448g00020	NA	NA	NA	NA	NA	NA	NA	NA	NA	NA	NA	NA	NA	NA	NA	'35.2'	'not assigned.not annotated'	' no hits & (original description: none)'
Vitvi00g02172	0	NA	NA	NA	NA	NA	0	NA	NA	NA	NA	NA	0	NA	NA	NA	NA	NA	0	NA	NA	NA	NA	NA	VIT_00s1448g00030	NA	NA	NA	NA	NA	NA	NA	NA	NA	NA	NA	NA	NA	NA	NA	'35.2'	'not assigned.not annotated'	' no hits & (original description: none)'
Vitvi00g02173	777.114	-0.724778	0.66637	-1.08765	0.276749	0.403255	777.114	-0.88325	0.593018	-1.48941	0.136378	0.216272	777.114	-1.56749	0.591672	-2.64926	0.00806675	0.0192761	777.114	-2.79381	0.592376	-4.71627	2.40211e-06	1.31983e-05	VIT_00s1455g00010	AT4G17030.1	1.4e-49	195.7	1-to-1	NA	AT4G17030.1	expansin-like B1	Encodes EXLB1 (expansin-like B1)%2C a member of the expansin family.	"EXLB1"	AT-EXPR.ATEXLB1.expansin-like B1.ATEXPR1.ATHEXP BETA 3.1.EXPR	expansin-like B1	expansin-like B1 (EXLB1)%3B INVOLVED IN: sexual reproduction%2C unidimensional cell growth%2C plant-type cell wall loosening%3B LOCATED IN: endomembrane system%2C extracellular region%3B EXPRESSED IN: 19 plant structures%3B EXPRESSED DURING: 9 growth stages%3B CONTAINS InterPro DOMAIN/s: Pollen allergen%2C N-terminal (InterPro:IPR014734)%2C Rare lipoprotein A (InterPro:IPR005132)%2C Pollen allerg…	*****	PMID:18296723.gene:2130443.UniProt:O23547	NA	'35.1'	'not assigned.annotated'	'Expansin-like B1 OS=Arabidopsis thaliana (sp|o23547|exlb1_arath : 189.0)'
Vitvi00g02174	16.3983	-1.78246	0.534762	-3.33318	0.000858606	0.0036398	16.3983	-2.02807	0.497833	-4.0738	4.62524e-05	0.000204168	16.3983	-0.567607	0.389261	-1.45817	0.144795	0.228058	16.3983	-1.85692	0.463443	-4.00679	6.15495e-05	0.000250116	VIT_00s1455g00020	AT4G17040.1	1.1e-20	98.2	1-to-1	NA	AT4G17040.1	CLP protease R subunit 4	HON5 (At4g17040) encodes the ClpR4 subunit of the chloroplast-localized Clp protease complex. hon mutations disturb plastid protein homeostasis%2C thereby activating plastid signaling and inducing stress acclimatization.	"CLPR4"	HON5.happy on norflurazon 5	CLP protease R subunit 4	CLP protease R subunit 4 (CLPR4)%3B FUNCTIONS IN: serine-type endopeptidase activity%3B INVOLVED IN: proteolysis%3B LOCATED IN: plastid stroma%2C chloroplast%2C chloroplast stroma%2C chloroplast envelope%3B EXPRESSED IN: 22 plant structures%3B EXPRESSED DURING: 13 growth stages%3B CONTAINS InterPro DOMAIN/s: Peptidase S14%2C ClpP (InterPro:IPR001907)%3B BEST Arabidopsis thaliana protein match is:…	****	PMID:11299370.PMID:11278690.PMID:12938931.PMID:14593120.PMID:18431481.PMID:18633119.PMID:16207701.gene:2130448.UniProt:Q8LB10	NA	'35.1'	'not assigned.annotated'	'ATP-dependent Clp protease proteolytic subunit-related protein 4. chloroplastic OS=Arabidopsis thaliana (sp|q8lb10|clpr4_arath : 95.1)'
Vitvi00g02175	59.4731	0.482637	0.463336	1.04166	0.29757	0.426058	59.4731	0.499252	0.42395	1.17762	0.238949	0.339523	59.4731	0.149978	0.408817	0.366858	0.713725	0.79181	59.4731	0.00438243	0.415728	0.0105416	0.991589	0.99807	VIT_00s1463g00010	AT4G18370.1	1.2e-08	60.5	1-to-many	AT4G18370.2.AT4G18370.3	AT4G18370.1	DEGP protease 5	Encodes DEG5. Forms a hexamer with DEG8 in the thylakoid lumen. Involved in the cleavage of photodamaged D2 protein of photosystem II (PSII).	"DEG5"	DEGP5.DEGP PROTEASE 5.HHOA.PROTEASE HHOA PRECUSOR	degradation of periplasmic proteins 5	DEGP protease 5 (DEG5)%3B FUNCTIONS IN: serine-type peptidase activity%2C catalytic activity%2C serine-type endopeptidase activity%3B INVOLVED IN: photosystem II repair%2C proteolysis%3B LOCATED IN: thylakoid%2C thylakoid lumen%2C chloroplast thylakoid lumen%2C chloroplast%3B EXPRESSED IN: 22 plant structures%3B EXPRESSED DURING: 13 growth stages%3B CONTAINS InterPro DOMAIN/s: Serine/cysteine pep…	****	PMID:11719511.PMID:11826309.PMID:15028209.PMID:16648217.PMID:18431481.gene:2124508.UniProt:Q9SEL7	NA	'35.2'	'not assigned.not annotated'	' no hits & (original description: none)'
Vitvi00g02177	0	NA	NA	NA	NA	NA	0	NA	NA	NA	NA	NA	0	NA	NA	NA	NA	NA	0	NA	NA	NA	NA	NA	VIT_00s1491g00010	AT5G07440.1	6.1e-42	169.5	1-to-many	AT5G07440.2.AT5G07440.3	AT5G07440.1	glutamate dehydrogenase 2	Encodes the beta-subunit of the glutamate dehydrogenase. The enzyme is almost exclusively found in the mitochondria of stem and leaf companion cells.	"GDH2"	NA	glutamate dehydrogenase 2	glutamate dehydrogenase 2 (GDH2)%3B FUNCTIONS IN: in 7 functions%3B INVOLVED IN: response to cadmium ion%2C response to salt stress%3B LOCATED IN: mitochondrion%2C plasma membrane%3B EXPRESSED IN: 27 plant structures%3B EXPRESSED DURING: 16 growth stages%3B CONTAINS InterPro DOMAIN/s: Glutamate/phenylalanine/leucine/valine dehydrogenase (InterPro:IPR006095)%2C Glutamate/phenylalanine/leucine/vali…	****	PMID:11743115.PMID:14671022.PMID:16242667.PMID:16418233.PMID:16502469.PMID:17137349.PMID:17151019.PMID:17916636.PMID:18385124.PMID:18467460.gene:2183378.UniProt:Q38946	NA	'25.1.6.1'	'Nutrient uptake.nitrogen assimilation.glutamate deamination.glutamate dehydrogenase'	'Nutrient uptake.nitrogen assimilation.glutamate deamination.glutamate dehydrogenase (original description: none)'
Vitvi00g02178	418.656	-1.40935	0.161728	-8.71432	2.92517e-18	1.28198e-16	418.656	-1.33561	0.143671	-9.29632	1.45395e-20	5.33258e-19	418.656	-1.45526	0.140574	-10.3523	4.08667e-25	1.80491e-23	418.656	-1.71187	0.144456	-11.8505	2.14035e-32	2.25803e-30	VIT_00s1491g00020	AT4G17600.1	1.8e-52	206.1	1-to-1	NA	AT4G17600.1	Chlorophyll A-B binding family protein	Encodes Lil3:1 (light-harvesting-like) protein. Belongs to the Lhc super-gene family encodes the light-harvesting chlorophyll a/b-binding (LHC) proteins that constitute the antenna system of the photosynthetic apparatus. A generic LHC motif is present in Lil3:1.	"LIL3:1"	NA	NA	LIL3:1%3B FUNCTIONS IN: sequence-specific DNA binding transcription factor activity%3B INVOLVED IN: regulation of transcription%3B LOCATED IN: chloroplast thylakoid membrane%2C chloroplast%3B EXPRESSED IN: 24 plant structures%3B EXPRESSED DURING: 13 growth stages%3B BEST Arabidopsis thaliana protein match is: Chlorophyll A-B binding family protein (TAIR:AT5G47110.1)%3B Has 30201 Blast hits to 173…	****	PMID:11118137.PMID:15322131.PMID:18431481.gene:2129295.UniProt:Q9SYX1	NA	'1.1.1.6.2.3'	'Photosynthesis.photophosphorylation.photosystem II.LHC-related protein groups.two-helix LHC-related protein group.SEP3 protein'	'Photosynthesis.photophosphorylation.photosystem II.LHC-related protein groups.two-helix LHC-related protein group.SEP3 protein (original description: none)'
Vitvi00g02180	0.478567	0	6.58482	0	1	NA	0.478567	4.21687	5.78969	0.728341	0.466405	NA	0.478567	0	5.88968	0	1	NA	0.478567	0	5.88968	0	1	NA		NA	NA	NA	NA	NA	NA	NA	NA	NA	NA	NA	NA	NA	NA	NA	'35.2'	'not assigned.not annotated'	' no hits & (original description: none)'
Vitvi00g02184	220.04	0.0249574	0.202038	0.123528	0.901689	0.939164	220.04	-0.454391	0.185667	-2.44735	0.0143911	0.0326191	220.04	-0.049055	0.179533	-0.273237	0.784671	0.84771	220.04	-0.899569	0.182288	-4.93487	8.02047e-07	4.85493e-06	VIT_00s1522g00010	AT5G65495.1	5.2e-17	85.5	1-to-1	NA	AT5G65495.1	hypothetical protein	NA	NA	NA	NA	unknown protein%3B Has 9 Blast hits to 9 proteins in 5 species: Archae - 0%3B Bacteria - 0%3B Metazoa - 0%3B Fungi - 0%3B Plants - 9%3B Viruses - 0%3B Other Eukaryotes - 0 (source: NCBI BLink).	*****	gene:1005715875.UniProt:Q8GWU7	NA	'35.2'	'not assigned.not annotated'	' no hits & (original description: none)'
Vitvi00g02189	1.66618	3.53083	3.71518	0.950381	0.341919	0.47196	1.66618	3.35054	3.31722	1.01004	0.312474	0.419386	1.66618	4.97017	3.26804	1.52084	0.1283	0.206486	1.66618	2.10688	3.37747	0.623804	0.532756	0.634265	GSVIVT00013685001	NA	NA	NA	NA	NA	NA	NA	NA	NA	NA	NA	NA	NA	NA	NA	'35.2'	'not assigned.not annotated'	' no hits & (original description: none)'
Vitvi00g02191	0.444682	0	6.58482	0	1	NA	0.444682	-1.52377	5.87051	-0.259564	0.7952	NA	0.444682	-1.39674	5.86253	-0.238249	0.811688	NA	0.444682	-3.51423	5.80213	-0.60568	0.544728	NA	VIT_00s1562g00010	AT5G49190.1	7.9e-109	391.3	1-to-many	AT5G49190.2.AT5G49190.3	AT5G49190.1	sucrose synthase 2	Encodes a sucrose synthase (SUS2). The activity of the enzyme could not be assayed as proved to be insoluble (PMID 17257168). However%2C analyses of an sus2 mutant revealed a deficiency in sucrose synthase activity 12 and 15 days after flowering. There are some reports that SUS2 transcript levels are increased in leaves specifically by O(2) deficiency whereas other reports indicate that SUS2 is e…	"SUS2"	ATSUS2.SSA.SUCROSE SYNTHASE FROM ARABIDOPSIS	sucrose synthase 2	sucrose synthase 2 (SUS2)%3B FUNCTIONS IN: UDP-glycosyltransferase activity%2C sucrose synthase activity%2C transferase activity%2C transferring glycosyl groups%3B INVOLVED IN: sucrose biosynthetic process%2C seed maturation%2C response to hypoxia%2C sucrose metabolic process%2C starch metabolic process%3B LOCATED IN: cytosol%2C plastid%2C membrane%2C plant-type cell wall%3B EXPRESSED IN: 6 plant…	****	PMID:16287169.PMID:17432890.gene:2155893.UniProt:Q00917	NA	'3.1.4.2'	'Carbohydrate metabolism.sucrose metabolism.degradation.sucrose synthase'	'Carbohydrate metabolism.sucrose metabolism.degradation.sucrose synthase (original description: none)'
Vitvi00g02194	0	NA	NA	NA	NA	NA	0	NA	NA	NA	NA	NA	0	NA	NA	NA	NA	NA	0	NA	NA	NA	NA	NA		AT3G21000.1	4.1e-09	60.1	1-to-1	NA	AT3G21000.1	Gag-Pol-related retrotransposon family protein	NA	NA	NA	NA	Gag-Pol-related retrotransposon family protein%3B BEST Arabidopsis thaliana protein match is: Gag-Pol-related retrotransposon family protein (TAIR:AT3G20980.1)%3B Has 830 Blast hits to 808 proteins in 47 species: Archae - 0%3B Bacteria - 0%3B Metazoa - 29%3B Fungi - 57%3B Plants - 743%3B Viruses - 0%3B Other Eukaryotes - 1 (source: NCBI BLink).	*****	gene:2092989.UniProt:Q1PEN6	NA	'35.2'	'not assigned.not annotated'	' no hits & (original description: none)'
Vitvi00g02199	3.76757	0.124993	1.36564	0.0915268	0.927074	0.955315	3.76757	2.27644	1.18445	1.92195	0.0546125	0.10123	3.76757	0.681415	1.0178	0.669498	0.503178	0.612103	3.76757	1.92641	1.13731	1.69382	0.0902992	0.151777	VIT_00s1616g00010	AT4G16807.1	6.1e-14	77.8	1-to-1	NA	AT4G16807.1	ATP-dependent caseinolytic protease/crotonase family protein	NA	NA	NA	NA	unknown protein%3B FUNCTIONS IN: molecular_function unknown%3B INVOLVED IN: biological_process unknown%3B LOCATED IN: cellular_component unknown%3B BEST Arabidopsis thaliana protein match is: unknown protein (TAIR:AT3G33528.1)%3B Has 30201 Blast hits to 17322 proteins in 780 species: Archae - 12%3B Bacteria - 1396%3B Metazoa - 17338%3B Fungi - 3422%3B Plants - 5037%3B Viruses - 0%3B Other Eukaryo…	****	gene:4515101868.UniProt:F4JML6	NA	'35.2'	'not assigned.not annotated'	' no hits & (original description: none)'
Vitvi00g02204	1.06319	-3.85852	3.92886	-0.982096	0.326052	NA	1.06319	0.0280349	3.50582	0.00799667	0.99362	0.997123	1.06319	-0.384374	3.61347	-0.106373	0.915287	0.941868	1.06319	-1.29874	3.48755	-0.372394	0.7096	0.784339		AT5G48050.1	7.3e-12	70.1	1-to-1	NA	AT5G48050.1	Copia-like polyprotein/retrotransposon	NA	NA	NA	NA	CONTAINS InterPro DOMAIN/s: Retrotransposon gag protein (InterPro:IPR005162)%3B BEST Arabidopsis thaliana protein match is: unknown protein (TAIR:AT1G34070.1)%3B Has 1807 Blast hits to 1807 proteins in 277 species: Archae - 0%3B Bacteria - 0%3B Metazoa - 736%3B Fungi - 347%3B Plants - 385%3B Viruses - 0%3B Other Eukaryotes - 339 (source: NCBI BLink).	*	gene:2162706.UniProt:Q9FI33	NA	'35.1'	'not assigned.annotated'	'Retrovirus-related Pol polyprotein from transposon RE1 OS=Arabidopsis thaliana (sp|q94hw2|polr1_arath : 120.0)'
Vitvi00g02205	0.0658732	0	6.58482	0	1	NA	0.0658732	0	5.88922	0	1	NA	0.0658732	-1.39674	5.86253	-0.238249	0.811688	NA	0.0658732	0	5.88968	0	1	NA	VIT_00s1652g00010	AT1G07920.1	3.6e-08	54.3	1-to-many	AT1G07930.1.AT1G07940.1.AT1G07940.2.AT1G07940.3.AT1G07940.4.AT5G60390.1.AT5G60390.2.AT5G60390.3	AT1G07920.1	GTP binding Elongation factor Tu family protein	NA	NA	NA	NA	GTP binding Elongation factor Tu family protein%3B FUNCTIONS IN: calmodulin binding%2C translation elongation factor activity%3B INVOLVED IN: response to cadmium ion%3B LOCATED IN: mitochondrion%2C nucleolus%2C plasma membrane%2C chloroplast%2C membrane%3B EXPRESSED IN: 6 plant structures%3B EXPRESSED DURING: seedling growth%3B CONTAINS InterPro DOMAIN/s: Translation elongation factor EFTu/EF1A%2…	****	PMID:11782485.PMID:14671022.PMID:15028209.PMID:15496452.PMID:15971193.PMID:16247729.PMID:16242667.PMID:16502469.PMID:17151019.PMID:17317660.PMID:17432890.PMID:17644812.PMID:18431481.PMID:23289948.gene:2205094.UniProt:Q0WL56	NA	'35.2'	'not assigned.not annotated'	' no hits & (original description: none)'
Vitvi00g02208	655.89	-0.063458	0.13655	-0.464723	0.64213	0.746903	655.89	-0.0474961	0.124465	-0.3816	0.702758	0.778713	655.89	0.428326	0.12265	3.49226	0.000478958	0.00155791	655.89	0.627662	0.125526	5.00024	5.72601e-07	3.56152e-06	VIT_00s1667g00010	AT1G79450.1	4.4e-37	155.2	1-to-many	AT1G79450.2	AT1G79450.1	ALA-interacting subunit 5	NA	"ALIS5"	NA	ALA-interacting subunit 5	ALA-interacting subunit 5 (ALIS5)%3B INVOLVED IN: biological_process unknown%3B LOCATED IN: chloroplast thylakoid lumen%2C plasma membrane%2C membrane%3B EXPRESSED IN: 12 plant structures%3B EXPRESSED DURING: L mature pollen stage%2C M germinated pollen stage%2C 4 anthesis%2C petal differentiation and expansion stage%3B CONTAINS InterPro DOMAIN/s: Protein of unknown function DUF284%2C transmembra…	****	PMID:11719511.PMID:17317660.gene:2206399.UniProt:Q8L8W0	NA	'24.1.2.4.1.2'	'Solute transport.primary active transport.P-type ATPase superfamily.P4 family.phospholipid flippase complex.ALIS regulatory component'	'Solute transport.primary active transport.P-type ATPase superfamily.P4 family.phospholipid flippase complex.ALIS regulatory component (original description: none)'
Vitvi00g02209	0.904811	-4.11645	5.03508	-0.817556	0.413611	NA	0.904811	-0.847081	4.61398	-0.18359	0.854335	0.896461	0.904811	-3.24697	4.49441	-0.722447	0.47002	0.580635	0.904811	-2.33577	4.55257	-0.513067	0.607904	0.700526		NA	NA	NA	NA	NA	NA	NA	NA	NA	NA	NA	NA	NA	NA	NA	'35.2'	'not assigned.not annotated'	' no hits & (original description: none)'
Vitvi00g02210	0.791795	-2.78602	4.83078	-0.576723	0.564127	NA	0.791795	-2.0988	4.35477	-0.481954	0.629838	NA	0.791795	-4.24558	4.27631	-0.992815	0.3208	0.432097	0.791795	0	4.41883	0	1	NA		NA	NA	NA	NA	NA	NA	NA	NA	NA	NA	NA	NA	NA	NA	NA	'35.2'	'not assigned.not annotated'	' no hits & (original description: none)'
Vitvi00g02211	66.1326	-0.0562595	0.363667	-0.154701	0.877057	0.922109	66.1326	0.0816718	0.327951	0.249037	0.803332	0.857532	66.1326	-0.257472	0.323751	-0.795278	0.426452	0.539008	66.1326	-0.646633	0.342429	-1.88837	0.0589765	0.106518	VIT_00s1675g00010	AT4G16845.1	5.1e-09	62	1-to-many	AT4G16845.2	AT4G16845.1	VEFS-Box of polycomb protein	The VERNALIZATION2 (VRN2) gene mediates vernalization and encodes a nuclear-localized zinc finger protein with similarity to Polycomb group (PcG) proteins of plants and animals. In wild-type Arabidopsis%2C vernalization results in the stable reduction of the levels of the floral repressor FLC. In vrn2 mutants%2C FLC expression is downregulated normally in response to vernalization%2C but instead …	"VRN2"	NA	REDUCED VERNALIZATION RESPONSE 2	REDUCED VERNALIZATION RESPONSE 2 (VRN2)%3B CONTAINS InterPro DOMAIN/s: Polycomb protein%2C VEFS-Box (InterPro:IPR019135)%3B BEST Arabidopsis thaliana protein match is: VEFS-Box of polycomb protein (TAIR:AT5G51230.1)%3B Has 30201 Blast hits to 17322 proteins in 780 species: Archae - 12%3B Bacteria - 1396%3B Metazoa - 17338%3B Fungi - 3422%3B Plants - 5037%3B Viruses - 0%3B Other Eukaryotes - 2996 …	****	PMID:11118137.gene:3705127.UniProt:Q8W5B1	NA	'12.3.3.1.1.3'	'Chromatin organisation.histone modifications.histone lysine methylation/demethylation.PRC2 histone methylation complex.VRN/FIS/EMF core complexes.SUZ12-like component (EMF2.VRN2.FIS2)'	'Chromatin organisation.histone modifications.histone lysine methylation/demethylation.PRC2 histone methylation complex.VRN/FIS/EMF core complexes.SUZ12-like component (EMF2.VRN2.FIS2) (original description: none)'
Vitvi00g02213	15.8527	0.824331	0.468829	1.75828	0.0787007	0.152943	15.8527	1.02944	0.455047	2.26228	0.0236804	0.0500149	15.8527	0.193388	0.408696	0.473184	0.636082	0.728302	15.8527	1.0755	0.552389	1.947	0.0515351	0.0952866	VIT_00s1684g00010	NA	NA	NA	NA	NA	NA	NA	NA	NA	NA	NA	NA	NA	NA	NA	'35.2'	'not assigned.not annotated'	' no hits & (original description: none)'
Vitvi00g02214	0	NA	NA	NA	NA	NA	0	NA	NA	NA	NA	NA	0	NA	NA	NA	NA	NA	0	NA	NA	NA	NA	NA	VIT_00s1688g00010	AT1G80680.1	1.9e-12	72	1-to-1	NA	AT1G80680.1	SUPPRESSOR OF AUXIN RESISTANCE 3	Mutant has early-flowering phenotype%2C encodes a putative nucleoporin. Required for the activation of downstream defense pathways by the snc1 mutation. Involved in basal resistance against bacterial pathogens.	"SAR3"	MOS3.MODIFIER OF SNC1.3.NUP96.PRE.PRECOCIOUS	SUPPRESSOR OF AUXIN RESISTANCE 3	SUPPRESSOR OF AUXIN RESISTANCE 3 (SAR3)%3B FUNCTIONS IN: porin activity%3B INVOLVED IN: mRNA export from nucleus%2C defense response signaling pathway%2C resistance gene-dependent%2C response to auxin stimulus%2C negative regulation of flower development%2C developmental process%3B LOCATED IN: nuclear membrane%2C nucleus%3B EXPRESSED IN: 23 plant structures%3B EXPRESSED DURING: 13 growth stages%3…	****	PMID:11605952.PMID:16809813.gene:2025736.UniProt:Q8LLD0	NA	'35.2'	'not assigned.not annotated'	' no hits & (original description: none)'
Vitvi00g02215	0.897313	0.984346	1.89139	0.520436	0.60276	NA	0.897313	-0.847059	2.23196	-0.379514	0.704306	0.780044	0.897313	0.0606534	1.73303	0.0349986	0.972081	0.983397	0.897313	0.836056	2.23198	0.37458	0.707973	0.783152		NA	NA	NA	NA	NA	NA	NA	NA	NA	NA	NA	NA	NA	NA	NA	'35.2'	'not assigned.not annotated'	' no hits & (original description: none)'
Vitvi00g02217	55.303	3.08387	0.361753	8.52479	1.53082e-17	6.19992e-16	55.303	1.98021	0.370763	5.34092	9.24768e-08	7.00731e-07	55.303	2.63509	0.337505	7.80755	5.83092e-15	1.08532e-13	55.303	2.09675	0.381968	5.48933	4.03456e-08	3.06649e-07	VIT_00s1711g00020	NA	NA	NA	NA	NA	NA	NA	NA	NA	NA	NA	NA	NA	NA	NA	'35.2'	'not assigned.not annotated'	' no hits & (original description: none)'
Vitvi00g02219	404.28	-0.357115	0.154668	-2.30891	0.0209485	0.0526771	404.28	-0.194272	0.138622	-1.40145	0.161079	0.246808	404.28	-0.186159	0.137761	-1.35132	0.176594	0.268318	404.28	0.163085	0.138407	1.1783	0.238676	0.336893	VIT_00s1737g00010	AT4G22750.1	1.2e-18	93.6	1-to-1	NA	AT4G22750.1	DHHC-type zinc finger protein	NA	NA	NA	NA	DHHC-type zinc finger family protein%3B FUNCTIONS IN: zinc ion binding%3B LOCATED IN: endomembrane system%3B EXPRESSED IN: 24 plant structures%3B EXPRESSED DURING: 15 growth stages%3B CONTAINS InterPro DOMAIN/s: Zinc finger%2C DHHC-type (InterPro:IPR001594)%3B BEST Arabidopsis thaliana protein match is: sterol 4-alpha methyl oxidase 1-3 (TAIR:AT4G22753.2)%3B Has 30201 Blast hits to 17322 proteins…	****	gene:2132653.UniProt:Q94C49	NA	'35.1'	'not assigned.annotated'	'Probable protein S-acyltransferase 14 OS=Arabidopsis thaliana (sp|q8vyp5|zdh14_arath : 101.0)'
Vitvi00g02220	1.90451	-2.59648	2.96905	-0.874514	0.381838	0.512923	1.90451	-4.65474	2.63868	-1.76404	0.0777252	0.136017	1.90451	0	2.86522	0	1	1	1.90451	-2.38282	2.54766	-0.935301	0.349633	0.457012	VIT_00s1754g00010	AT5G63810.1	4.7e-11	67.8	1-to-1	NA	AT5G63810.1	beta-galactosidase 10	member of Glycoside Hydrolase Family 35	"BGAL10"	AtBGAL10.Arabidopsis thaliana beta-galactosidase 10	beta-galactosidase 10	beta-galactosidase 10 (BGAL10)%3B FUNCTIONS IN: cation binding%2C beta-galactosidase activity%2C hydrolase activity%2C hydrolyzing O-glycosyl compounds%2C catalytic activity%3B INVOLVED IN: response to karrikin%3B LOCATED IN: cell wall%2C plant-type cell wall%3B EXPRESSED IN: 25 plant structures%3B EXPRESSED DURING: 14 growth stages%3B CONTAINS InterPro DOMAIN/s: Glycoside hydrolase%2C family 35%…	*****	PMID:14595688.PMID:16267099.PMID:17526915.gene:3441089.UniProt:Q9FN08	NA	'21.3.2.2.1'	'Cell wall.pectin.rhamnogalacturonan I.modification and degradation.beta-galactosidase'	'Cell wall.pectin.rhamnogalacturonan I.modification and degradation.beta-galactosidase (original description: none)'
Vitvi00g02224	4.21904	-4.05641	1.57282	-2.57906	0.00990698	0.0285702	4.21904	-4.64455	1.4131	-3.28679	0.00101338	0.00321634	4.21904	-5.9315	1.37949	-4.29979	1.70962e-05	7.63147e-05	4.21904	-2.61571	1.28229	-2.03986	0.041364	0.0789817	VIT_00s1803g00010	AT5G63810.1	4.7e-11	67.8	1-to-1	NA	AT5G63810.1	beta-galactosidase 10	member of Glycoside Hydrolase Family 35	"BGAL10"	AtBGAL10.Arabidopsis thaliana beta-galactosidase 10	beta-galactosidase 10	beta-galactosidase 10 (BGAL10)%3B FUNCTIONS IN: cation binding%2C beta-galactosidase activity%2C hydrolase activity%2C hydrolyzing O-glycosyl compounds%2C catalytic activity%3B INVOLVED IN: response to karrikin%3B LOCATED IN: cell wall%2C plant-type cell wall%3B EXPRESSED IN: 25 plant structures%3B EXPRESSED DURING: 14 growth stages%3B CONTAINS InterPro DOMAIN/s: Glycoside hydrolase%2C family 35%…	*****	PMID:14595688.PMID:16267099.PMID:17526915.gene:3441089.UniProt:Q9FN08	NA	'21.3.2.2.1'	'Cell wall.pectin.rhamnogalacturonan I.modification and degradation.beta-galactosidase'	'Cell wall.pectin.rhamnogalacturonan I.modification and degradation.beta-galactosidase (original description: none)'
Vitvi00g02225	0	NA	NA	NA	NA	NA	0	NA	NA	NA	NA	NA	0	NA	NA	NA	NA	NA	0	NA	NA	NA	NA	NA	VIT_00s1814g00010	AT5G48520.1	0.0002	44.7	1-to-many	AT5G48520.2	AT5G48520.1	HAUS augmin-like complex subunit	Encodes AUGMIN subunit3 (AUG3)%2C a homolog of animal dim gamma-tubulin 3/human augmin-like complex%2C subunit 3. Plays a critical role in microtubule organization during plant cell division.	"AUG3"	AtAUG3	augmin 3	unknown protein%3B Has 609 Blast hits to 593 proteins in 129 species: Archae - 0%3B Bacteria - 41%3B Metazoa - 390%3B Fungi - 40%3B Plants - 64%3B Viruses - 0%3B Other Eukaryotes - 74 (source: NCBI BLink).	****	PMID:14505352.gene:2166070.UniProt:Q0WQE7	NA	'35.2'	'not assigned.not annotated'	' no hits & (original description: none)'
Vitvi00g02226	3.81457	1.53825	1.35153	1.13816	0.255056	0.380304	3.81457	-1.7676	1.4718	-1.20098	0.22976	0.328895	3.81457	-0.0835046	1.19352	-0.0699652	0.944221	0.96323	3.81457	3.82248	1.68895	2.26323	0.0236214	0.0487634	VIT_00s1830g00010	AT5G38280.1	3.2e-96	350.9	1-to-many	AT5G38280.2	AT5G38280.1	PR5-like receptor kinase	putative receptor serine/threonine kinase PR5K (PR5K) mRNA%2C PR5-like receptor kinase	"PR5K"	NA	PR5-like receptor kinase	PR5-like receptor kinase (PR5K)%3B FUNCTIONS IN: transmembrane receptor protein serine/threonine kinase activity%2C kinase activity%3B INVOLVED IN: response to fungus%3B LOCATED IN: endomembrane system%3B EXPRESSED IN: 6 plant structures%3B EXPRESSED DURING: petal differentiation and expansion stage%3B CONTAINS InterPro DOMAIN/s: Protein kinase%2C ATP binding site (InterPro:IPR017441)%2C Protein …	*****	PMID:8637920.gene:2176736.UniProt:Q9FF29	NA	'50.2.7'	'Enzyme classification.EC_2 transferases.EC_2.7 transferase transferring phosphorus-containing group'	'Rust resistance kinase Lr10 OS=Triticum aestivum (sp|p93604|lrk10_wheat : 365.0) & Enzyme classification.EC_2 transferases.EC_2.7 transferase transferring phosphorus-containing group(50.2.7 : 122.0) (original description: none)'
Vitvi00g02232	0	NA	NA	NA	NA	NA	0	NA	NA	NA	NA	NA	0	NA	NA	NA	NA	NA	0	NA	NA	NA	NA	NA	VIT_00s1873g00010	AT4G30910.1	5.8e-08	54.7	1-to-many	AT4G30910.2.AT4G30920.1	AT4G30910.1	Cytosol aminopeptidase family protein	NA	NA	NA	NA	Cytosol aminopeptidase family protein%3B FUNCTIONS IN: manganese ion binding%2C metalloexopeptidase activity%2C aminopeptidase activity%3B INVOLVED IN: proteolysis%2C protein metabolic process%3B LOCATED IN: chloroplast%3B EXPRESSED IN: guard cell%3B CONTAINS InterPro DOMAIN/s: Peptidase M17%2C leucyl aminopeptidase%2C C-terminal (InterPro:IPR000819)%2C Peptidase M17%2C leucyl aminopeptidase%2C N…	****	PMID:15028209.gene:2126668.UniProt:Q8RX72	NA	'35.2'	'not assigned.not annotated'	' no hits & (original description: none)'
Vitvi00g02234	0.336216	1.25641	4.01604	0.312847	0.754397	NA	0.336216	0.114746	3.61709	0.0317233	0.974693	NA	0.336216	0.152258	3.54805	0.0429132	0.965771	NA	0.336216	0.836053	3.6172	0.231133	0.817212	NA	VIT_00s1914g00010	AT4G17510.1	4.3e-12	69.3	1-to-1	NA	AT4G17510.1	ubiquitin C-terminal hydrolase 3	NA	"UCH3"	NA	ubiquitin C-terminal hydrolase 3	ubiquitin C-terminal hydrolase 3 (UCH3)%3B FUNCTIONS IN: ubiquitin thiolesterase activity%3B INVOLVED IN: ubiquitin-dependent protein catabolic process%3B LOCATED IN: intracellular%3B EXPRESSED IN: 24 plant structures%3B EXPRESSED DURING: 15 growth stages%3B CONTAINS InterPro DOMAIN/s: Peptidase C12%2C ubiquitin carboxyl-terminal hydrolase 1 (InterPro:IPR001578)%3B BEST Arabidopsis thaliana prote…	*****	gene:2129150.UniProt:Q8GWE1	NA	'50.3.4'	'Enzyme classification.EC_3 hydrolases.EC_3.4 hydrolase acting on peptide bond (peptidase)'	'Enzyme classification.EC_3 hydrolases.EC_3.4 hydrolase acting on peptide bond (peptidase)(50.3.4 : 33.8) (original description: none)'
Vitvi00g02235	1.86155	0	4.31974	0	1	1	1.86155	-3.32578	3.72743	-0.892244	0.372262	0.479344	1.86155	-1.45425	3.8167	-0.381022	0.703187	0.783477	1.86155	-5.83467	3.68965	-1.58136	0.113795	0.183876		AT1G64260.1	7.6e-76	283.1	1-to-many	AT1G64260.2	AT1G64260.1	MuDR family transposase	NA	NA	NA	NA	MuDR family transposase%3B FUNCTIONS IN: zinc ion binding%3B INVOLVED IN: biological_process unknown%3B LOCATED IN: cellular_component unknown%3B EXPRESSED IN: shoot apex%2C embryo%2C leaf whorl%2C flower%2C seed%3B EXPRESSED DURING: F mature embryo stage%2C petal differentiation and expansion stage%2C E expanded cotyledon stage%2C D bilateral stage%3B CONTAINS InterPro DOMAIN/s: MULE transposase…	*	gene:2014229.UniProt:Q9C7V1	NA	'35.2'	'not assigned.not annotated'	' no hits & (original description: none)'
Vitvi00g02236	217.679	0.181603	0.23881	0.760451	0.446985	0.575024	217.679	-0.123189	0.221235	-0.556825	0.577647	0.671779	217.679	-0.320844	0.213842	-1.50037	0.133518	0.213312	217.679	-0.312162	0.220928	-1.41296	0.157668	0.241054	VIT_00s1927g00010	AT4G21700.1	1.9e-08	57.8	1-to-1	NA	AT4G21700.1	DUF2921 family protein%2C putative (DUF2921)	NA	NA	NA	NA	Protein of unknown function (DUF2921)%3B INVOLVED IN: biological_process unknown%3B LOCATED IN: chloroplast%3B EXPRESSED IN: 12 plant structures%3B EXPRESSED DURING: LP.04 four leaves visible%2C 4 anthesis%2C LP.10 ten leaves visible%2C petal differentiation and expansion stage%2C E expanded cotyledon stage%3B CONTAINS InterPro DOMAIN/s: Protein of unknown function DUF2921 (InterPro:IPR021319)%3B…	***	PMID:15028209.gene:2119077.UniProt:Q9SVS7	NA	'35.2'	'not assigned.not annotated'	' no hits & (original description: none)'
Vitvi00g02237	718.592	-0.127253	0.240665	-0.528757	0.596974	0.709778	718.592	-0.156414	0.217156	-0.720283	0.471351	0.575066	718.592	-0.217194	0.215556	-1.0076	0.313647	0.424648	718.592	-1.72635	0.218472	-7.90194	2.74592e-15	6.04511e-14	VIT_00s1927g00020	AT2G33770.1	4.2e-60	230.7	1-to-1	NA	AT2G33770.1	phosphate 2	Encodes a ubiquitin-conjugating E2 enzyme. UBC24 mRNA accumulation is suppressed by miR399f%2C miR399b and miR399c. Involved in phosphate starvation response and mediates degradation of PHO1 and PHT1s at endomembrane. Its expression is responsive to phosphate (Pi) and not phosphite (Phi) in roots and shoots.	"PHO2"	ATUBC24.UBIQUITIN-CONJUGATING ENZYME 24.UBC24.UBIQUITIN-CONJUGATING ENZYME 24	phosphate 2	phosphate 2 (PHO2)%3B CONTAINS InterPro DOMAIN/s: Ubiquitin-conjugating enzyme/RWD-like (InterPro:IPR016135)%2C Ubiquitin-conjugating enzyme%2C E2 (InterPro:IPR000608)%3B BEST Arabidopsis thaliana protein match is: ubiquitin-conjugating enzyme 23 (TAIR:AT2G16920.1)%3B Has 6405 Blast hits to 6302 proteins in 368 species: Archae - 0%3B Bacteria - 0%3B Metazoa - 2716%3B Fungi - 1263%3B Plants - 1493…	****	PMID:9872450.PMID:9637070.PMID:11069711.PMID:11525517.PMID:12228355.PMID:15032863.PMID:15592750.PMID:15832687.PMID:16303564.PMID:16387831.PMID:16679424.PMID:16679417.PMID:16889977.PMID:17643101.PMID:17927693.PMID:17988220.PMID:18390805.gene:2057588.UniProt:Q8VY10	NA	'35.1'	'not assigned.annotated'	'Probable ubiquitin-conjugating enzyme E2 24 OS=Arabidopsis thaliana (sp|q8vy10|ubc24_arath : 163.0)'
Vitvi00g02238	3.503	-5.22401	1.59729	-3.27055	0.00107339	0.00441632	3.503	-4.86497	1.35555	-3.58894	0.000332024	0.00119592	3.503	-3.27506	1.19946	-2.73044	0.0063249	0.0155821	3.503	-2.69651	1.25198	-2.1538	0.0312562	0.0621259	VIT_00s1945g00010	AT4G30020.1	5.5e-38	156.4	1-to-many	AT4G30020.2.AT4G30020.3.AT4G30020.4	AT4G30020.1	PA-domain containing subtilase family protein	NA	NA	NA	NA	PA-domain containing subtilase family protein%3B FUNCTIONS IN: identical protein binding%2C serine-type endopeptidase activity%3B INVOLVED IN: proteolysis%2C negative regulation of catalytic activity%3B LOCATED IN: endomembrane system%2C cell wall%2C membrane%3B EXPRESSED IN: 20 plant structures%3B EXPRESSED DURING: 13 growth stages%3B CONTAINS InterPro DOMAIN/s: Protease-associated PA (InterPro:…	****	gene:2126484.UniProt:Q9SZV5	NA	'35.1'	'not assigned.annotated'	'Subtilisin-like protease SBT2.6 OS=Arabidopsis thaliana (sp|q9szv5|sbt26_arath : 152.0)'
Vitvi00g02240	0.234525	-1.9549	6.52194	-0.299741	0.764374	NA	0.234525	-0.846998	5.88922	-0.143822	0.885641	NA	0.234525	-1.33505	5.86651	-0.227571	0.81998	NA	0.234525	0	5.88968	0	1	NA	VIT_00s1967g00010	AT1G22060.1	1.9e-22	104	1-to-many	AT1G22060.2	AT1G22060.1	sporulation-specific protein	NA	NA	NA	NA	LOCATED IN: vacuole%3B EXPRESSED IN: 23 plant structures%3B EXPRESSED DURING: 13 growth stages%3B BEST Arabidopsis thaliana protein match is: FBD%2C F-box and Leucine Rich Repeat domains containing protein (TAIR:AT1G22000.1)%3B Has 84739 Blast hits to 38714 proteins in 2257 species: Archae - 1436%3B Bacteria - 11314%3B Metazoa - 40747%3B Fungi - 7706%3B Plants - 4675%3B Viruses - 308%3B Other Euk…	***	PMID:15539469.gene:2030540.UniProt:F4HZS8	NA	'35.2'	'not assigned.not annotated'	' no hits & (original description: none)'
Vitvi00g02242	0.0676338	-1.24749	6.5491	-0.190483	0.848931	NA	0.0676338	0	5.88922	0	1	NA	0.0676338	0	5.88968	0	1	NA	0.0676338	0	5.88968	0	1	NA		AT5G54440.1	7.7e-20	96.7	1-to-many	AT5G54440.2	AT5G54440.1	CLUB	Encodes a putative TRAPPII tethering factor required for cell plate assembly during cytokinesis.	"CLUB"	AtTRS130	CLUB	CLUB (CLUB)%3B CONTAINS InterPro DOMAIN/s: Protein of unknown function DUF3758 (InterPro:IPR022233)%3B Has 362 Blast hits to 266 proteins in 127 species: Archae - 0%3B Bacteria - 0%3B Metazoa - 146%3B Fungi - 118%3B Plants - 63%3B Viruses - 0%3B Other Eukaryotes - 35 (source: NCBI BLink).	****	gene:2147323.UniProt:F4K0C4	NA	'35.1'	'not assigned.annotated'	'Trafficking protein particle complex II-specific subunit 130 homolog OS=Arabidopsis thaliana (sp|f4k0c4|tr130_arath : 97.4)'
Vitvi00g02243	3229.31	0.977995	0.304845	3.20817	0.00133583	0.00533573	3229.31	0.410494	0.272647	1.50559	0.132173	0.210902	3229.31	1.54642	0.273316	5.65798	1.53167e-08	1.17932e-07	3229.31	2.06204	0.273246	7.54646	4.47259e-14	8.37048e-13	VIT_00s2032g00010	NA	NA	NA	NA	NA	NA	NA	NA	NA	NA	NA	NA	NA	NA	NA	'35.2'	'not assigned.not annotated'	' no hits & (original description: none)'
Vitvi00g02244	7.11176	1.88835	0.838883	2.25103	0.0243834	0.059602	7.11176	1.09017	1.00992	1.07946	0.280383	0.384962	7.11176	1.9204	0.79902	2.40344	0.0162414	0.035582	7.11176	2.36995	1.03214	2.29615	0.0216672	0.0452384	VIT_00s2034g00010	NA	NA	NA	NA	NA	NA	NA	NA	NA	NA	NA	NA	NA	NA	NA	'35.2'	'not assigned.not annotated'	' no hits & (original description: none)'
Vitvi00g02246	192.112	-0.243887	0.158015	-1.54345	0.122722	0.216552	192.112	-0.426279	0.1475	-2.89002	0.00385215	0.0104276	192.112	0.440881	0.137964	3.19563	0.00139528	0.00405623	192.112	0.542888	0.150152	3.61559	0.000299664	0.00103896	VIT_00s2044g00010	AT3G49640.1	1.2e-16	86.7	1-to-many	AT3G49640.2.AT3G49640.3.AT3G49640.4.AT3G49640.5	AT3G49640.1	Aldolase-type TIM barrel family protein	NA	NA	NA	NA	Aldolase-type TIM barrel family protein%3B FUNCTIONS IN: tRNA dihydrouridine synthase activity%2C FAD binding%2C catalytic activity%3B INVOLVED IN: regulation of nitrogen utilization%2C oxidation reduction%2C tRNA processing%2C metabolic process%3B LOCATED IN: endomembrane system%3B EXPRESSED IN: 22 plant structures%3B EXPRESSED DURING: 13 growth stages%3B CONTAINS InterPro DOMAIN/s: Aldolase-typ…	****	gene:2114712.UniProt:F4IY04	NA	'35.2'	'not assigned.not annotated'	' no hits & (original description: none)'
Vitvi00g02249	0.214471	-1.91627	6.52311	-0.293766	0.768936	NA	0.214471	-1.52375	5.87051	-0.259561	0.795203	NA	0.214471	-0.537148	5.88968	-0.0912017	0.927332	NA	0.214471	0	5.88968	0	1	NA		NA	NA	NA	NA	NA	NA	NA	NA	NA	NA	NA	NA	NA	NA	NA	'35.2'	'not assigned.not annotated'	' no hits & (original description: none)'
Vitvi00g02250	0	NA	NA	NA	NA	NA	0	NA	NA	NA	NA	NA	0	NA	NA	NA	NA	NA	0	NA	NA	NA	NA	NA		NA	NA	NA	NA	NA	NA	NA	NA	NA	NA	NA	NA	NA	NA	NA	'35.2'	'not assigned.not annotated'	' no hits & (original description: none)'
Vitvi00g02252	0	NA	NA	NA	NA	NA	0	NA	NA	NA	NA	NA	0	NA	NA	NA	NA	NA	0	NA	NA	NA	NA	NA	VIT_00s2146g00010	NA	NA	NA	NA	NA	NA	NA	NA	NA	NA	NA	NA	NA	NA	NA	'35.2'	'not assigned.not annotated'	' no hits & (original description: none)'
Vitvi00g02255	22.8952	0.321457	0.494012	0.650707	0.515236	0.638809	22.8952	0.0217981	0.469975	0.0463814	0.963006	0.975393	22.8952	-1.13874	0.450441	-2.52805	0.0114699	0.0262086	22.8952	-0.78512	0.446717	-1.75753	0.0788268	0.135695		NA	NA	NA	NA	NA	NA	NA	NA	NA	NA	NA	NA	NA	NA	NA	'35.2'	'not assigned.not annotated'	' no hits & (original description: none)'
Vitvi00g02256	5.37649	0.232118	1.10753	0.209582	0.833994	0.890942	5.37649	3.25215	1.35408	2.40175	0.016317	0.0363165	5.37649	1.04053	0.905889	1.14862	0.250711	0.355995	5.37649	4.93843	1.44105	3.42697	0.000610355	0.00195812		AT1G18390.2	8.2e-10	63.9	1-to-1	NA	AT1G18390.2	Serine/Threonine kinase family catalytic domain protein	NA	NA	LRK10L1.1.Leaf rust 10 disease-resistance locus receptor- like protein kinase-like 1.1.LRK10L1.2.Leaf rust 10 disease-resistance locus receptor- like protein kinase-like 1.2	NA	Protein kinase superfamily protein%3B FUNCTIONS IN: protein serine/threonine kinase activity%2C protein kinase activity%2C kinase activity%2C ATP binding%3B INVOLVED IN: protein amino acid phosphorylation%3B EXPRESSED IN: 22 plant structures%3B EXPRESSED DURING: 13 growth stages%3B CONTAINS InterPro DOMAIN/s: Protein kinase%2C ATP binding site (InterPro:IPR017441)%2C Protein kinase%2C catalytic d…	**	PMID:25533478.PMID:25510357.gene:5019473908	NA	'35.2'	'not assigned.not annotated'	' no hits & (original description: none)'
Vitvi00g02258	0.10352	2.62926	6.55297	0.401232	0.688249	NA	0.10352	1.07646	5.88922	0.182785	0.854967	NA	0.10352	0	5.88968	0	1	NA	0.10352	0	5.88968	0	1	NA	VIT_00s2182g00020	NA	NA	NA	NA	NA	NA	NA	NA	NA	NA	NA	NA	NA	NA	NA	'35.2'	'not assigned.not annotated'	' no hits & (original description: none)'
Vitvi00g02259	258.579	4.29521	0.252878	16.9853	1.05526e-64	1.04314e-61	258.579	3.50995	0.254582	13.7871	3.04659e-43	6.12095e-41	258.579	4.30236	0.241354	17.8259	4.44868e-71	2.76381e-68	258.579	3.72844	0.269611	13.8289	1.70508e-43	3.88246e-41		NA	NA	NA	NA	NA	NA	NA	NA	NA	NA	NA	NA	NA	NA	NA	'35.2'	'not assigned.not annotated'	' no hits & (original description: none)'
Vitvi00g02261	2.52709	-3.25198	2.32929	-1.39612	0.162677	0.269145	2.52709	1.58337	1.7974	0.880923	0.378359	0.485706	2.52709	-1.03412	1.83119	-0.564727	0.572259	0.674821	2.52709	-1.17374	1.71923	-0.682712	0.494789	0.599008	VIT_00s2213g00010	NA	NA	NA	NA	NA	NA	NA	NA	NA	NA	NA	NA	NA	NA	NA	'35.2'	'not assigned.not annotated'	' no hits & (original description: none)'
Vitvi00g02262	0.0688223	0	6.58482	0	1	NA	0.0688223	0	5.88922	0	1	NA	0.0688223	-1.45621	5.85885	-0.248548	0.80371	NA	0.0688223	0	5.88968	0	1	NA		AT3G21000.1	3.5e-09	60.1	1-to-1	NA	AT3G21000.1	Gag-Pol-related retrotransposon family protein	NA	NA	NA	NA	Gag-Pol-related retrotransposon family protein%3B BEST Arabidopsis thaliana protein match is: Gag-Pol-related retrotransposon family protein (TAIR:AT3G20980.1)%3B Has 830 Blast hits to 808 proteins in 47 species: Archae - 0%3B Bacteria - 0%3B Metazoa - 29%3B Fungi - 57%3B Plants - 743%3B Viruses - 0%3B Other Eukaryotes - 1 (source: NCBI BLink).	*****	gene:2092989.UniProt:Q1PEN6	NA	'35.2'	'not assigned.not annotated'	' no hits & (original description: none)'
Vitvi00g02263	0.140516	-0.084276	6.5823	-0.0128034	0.989785	NA	0.140516	-0.846969	5.88922	-0.143817	0.885645	NA	0.140516	-0.537148	5.88968	-0.0912017	0.927332	NA	0.140516	-1.08752	5.88968	-0.184648	0.853505	NA	VIT_00s2221g00010	NA	NA	NA	NA	NA	NA	NA	NA	NA	NA	NA	NA	NA	NA	NA	'35.2'	'not assigned.not annotated'	' no hits & (original description: none)'
Vitvi00g02264	0.0567931	0	6.58482	0	1	NA	0.0567931	1.07649	5.88922	0.18279	0.854963	NA	0.0567931	0	5.88968	0	1	NA	0.0567931	0	5.88968	0	1	NA	VIT_00s2246g00010	NA	NA	NA	NA	NA	NA	NA	NA	NA	NA	NA	NA	NA	NA	NA	'35.2'	'not assigned.not annotated'	' no hits & (original description: none)'
Vitvi00g02265	0.716501	-2.97461	5.37212	-0.553712	0.579776	NA	0.716501	-1.81558	4.8066	-0.377726	0.705634	NA	0.716501	-2.45653	4.80631	-0.511105	0.609277	0.705967	0.716501	-2.33346	4.8386	-0.48226	0.629622	NA	VIT_00s2248g00010	NA	NA	NA	NA	NA	NA	NA	NA	NA	NA	NA	NA	NA	NA	NA	'35.2'	'not assigned.not annotated'	' no hits & (original description: none)'
Vitvi00g02268	14.0932	-2.1695	2.1148	-1.02587	0.304955	0.433836	14.0932	-3.19272	1.93005	-1.65422	0.0980837	0.164733	14.0932	-4.24997	1.88358	-2.25632	0.0240506	0.049941	14.0932	-5.23156	2.18854	-2.39043	0.0168285	0.0364245	VIT_00s2254g00010	AT5G38280.1	2.6e-95	348.2	1-to-many	AT5G38280.2	AT5G38280.1	PR5-like receptor kinase	putative receptor serine/threonine kinase PR5K (PR5K) mRNA%2C PR5-like receptor kinase	"PR5K"	NA	PR5-like receptor kinase	PR5-like receptor kinase (PR5K)%3B FUNCTIONS IN: transmembrane receptor protein serine/threonine kinase activity%2C kinase activity%3B INVOLVED IN: response to fungus%3B LOCATED IN: endomembrane system%3B EXPRESSED IN: 6 plant structures%3B EXPRESSED DURING: petal differentiation and expansion stage%3B CONTAINS InterPro DOMAIN/s: Protein kinase%2C ATP binding site (InterPro:IPR017441)%2C Protein …	*****	PMID:8637920.gene:2176736.UniProt:Q9FF29	NA	'50.2.7'	'Enzyme classification.EC_2 transferases.EC_2.7 transferase transferring phosphorus-containing group'	'Rust resistance kinase Lr10 OS=Triticum aestivum (sp|p93604|lrk10_wheat : 370.0) & Enzyme classification.EC_2 transferases.EC_2.7 transferase transferring phosphorus-containing group(50.2.7 : 123.9) (original description: none)'
Vitvi00g02269	0.15324	2.62926	6.55297	0.401232	0.688249	NA	0.15324	0	5.88922	0	1	NA	0.15324	-0.537148	5.88968	-0.0912017	0.927332	NA	0.15324	-1.08752	5.88968	-0.184648	0.853505	NA	VIT_00s2258g00010	NA	NA	NA	NA	NA	NA	NA	NA	NA	NA	NA	NA	NA	NA	NA	'35.2'	'not assigned.not annotated'	' no hits & (original description: none)'
Vitvi00g02270	675.551	-0.914132	0.114283	-7.99886	1.25574e-15	4.25325e-14	675.551	-1.31528	0.104528	-12.583	2.61791e-36	3.23674e-34	675.551	-0.560068	0.100906	-5.55038	2.85052e-08	2.09495e-07	675.551	-0.954542	0.105403	-9.0561	1.352e-19	4.74223e-18	VIT_00s2262g00010	AT3G53110.1	8.4e-59	226.9	1-to-1	NA	AT3G53110.1	P-loop containing nucleoside triphosphate hydrolases superfamily protein	Encodes a putative DEAD-Box RNA Helicase and has RNA-dependent ATPase activity. Mutant is Sensitive to chilling stress and heat stress. Germination of the mutant is inhibited by ABA. LOS4 may be involved in temperature sensing. Is enriched in the nuclear envelope and also located in the cytoplasm. LOS4 is involved in export of poly A RNA.	"LOS4"	NA	LOW EXPRESSION OF OSMOTICALLY RESPONSIVE GENES 4	LOW EXPRESSION OF OSMOTICALLY RESPONSIVE GENES 4 (LOS4)%3B FUNCTIONS IN: RNA helicase activity%2C RNA-dependent ATPase activity%2C ATP-dependent helicase activity%3B INVOLVED IN: poly(A)+ mRNA export from nucleus%2C response to cold%2C response to heat%2C response to abscisic acid stimulus%3B LOCATED IN: nuclear envelope%2C plasma membrane%2C cytoplasm%3B EXPRESSED IN: 23 plant structures%3B EXPR…	****	PMID:9401119.PMID:17317660.PMID:21166475.gene:2101992.UniProt:Q93ZG7	NA	'35.1'	'not assigned.annotated'	'DEAD-box ATP-dependent RNA helicase 38 OS=Oryza sativa subsp. japonica (sp|q10ri7|rh38_orysj : 231.0)'
Vitvi00g02271	0.81492	0.0369231	2.91855	0.0126512	0.989906	NA	0.81492	0	2.94033	0	1	NA	0.81492	2.12526	2.68701	0.79094	0.428979	0.541468	0.81492	2.19545	2.832	0.77523	0.438204	NA	VIT_00s2263g00010	NA	NA	NA	NA	NA	NA	NA	NA	NA	NA	NA	NA	NA	NA	NA	'35.2'	'not assigned.not annotated'	' no hits & (original description: none)'
Vitvi00g02272	4.60312	-0.0509315	0.992701	-0.0513059	0.959082	0.977056	4.60312	-3.82543	1.30229	-2.93746	0.00330913	0.0091399	4.60312	-1.44949	0.958274	-1.51261	0.130379	0.209122	4.60312	-2.18849	1.06753	-2.05004	0.0403602	0.0774277	VIT_00s2265g00010	NA	NA	NA	NA	NA	NA	NA	NA	NA	NA	NA	NA	NA	NA	NA	'35.2'	'not assigned.not annotated'	' no hits & (original description: none)'
Vitvi00g02274	97.0387	-2.03619	0.40873	-4.98175	6.30131e-07	5.86106e-06	97.0387	-1.30026	0.353977	-3.6733	0.000239439	0.00089659	97.0387	-0.977819	0.344297	-2.84004	0.00451072	0.0115683	97.0387	-0.965062	0.355212	-2.71686	0.00659048	0.0159895	VIT_00s2279g00010	AT1G79450.1	3.8e-36	151.8	1-to-many	AT1G79450.2	AT1G79450.1	ALA-interacting subunit 5	NA	"ALIS5"	NA	ALA-interacting subunit 5	ALA-interacting subunit 5 (ALIS5)%3B INVOLVED IN: biological_process unknown%3B LOCATED IN: chloroplast thylakoid lumen%2C plasma membrane%2C membrane%3B EXPRESSED IN: 12 plant structures%3B EXPRESSED DURING: L mature pollen stage%2C M germinated pollen stage%2C 4 anthesis%2C petal differentiation and expansion stage%3B CONTAINS InterPro DOMAIN/s: Protein of unknown function DUF284%2C transmembra…	****	PMID:11719511.PMID:17317660.gene:2206399.UniProt:Q8L8W0	NA	'5.8.5.1.2'	'Lipid metabolism.lipid transport.phospholipid transverse translocation.ALA-ALIS flippase complex.ALIS regulatory component'	'Lipid metabolism.lipid transport.phospholipid transverse translocation.ALA-ALIS flippase complex.ALIS regulatory component (original description: none)'
Vitvi00g02277	36.447	4.86187	0.879137	5.53028	3.19726e-08	3.76754e-07	36.447	3.1267	0.850414	3.67668	0.000236289	0.000886255	36.447	6.20042	1.04027	5.96037	2.51664e-09	2.19251e-08	36.447	4.03883	0.966087	4.18061	2.90734e-05	0.000126913		NA	NA	NA	NA	NA	NA	NA	NA	NA	NA	NA	NA	NA	NA	NA	'35.2'	'not assigned.not annotated'	' no hits & (original description: none)'
Vitvi00g02280	0.345591	-1.39352	5.83173	-0.238955	0.81114	NA	0.345591	-2.41096	5.18946	-0.464588	0.642226	NA	0.345591	-0.53715	5.2587	-0.102145	0.918642	NA	0.345591	1.64167	5.23255	0.313742	0.753717	NA	GSVIVT01006109001	NA	NA	NA	NA	NA	NA	NA	NA	NA	NA	NA	NA	NA	NA	NA	'35.2'	'not assigned.not annotated'	' no hits & (original description: none)'
Vitvi00g02284	179.58	0.590196	0.208757	2.82719	0.00469583	0.0153386	179.58	0.312221	0.197043	1.58453	0.113073	0.185461	179.58	1.40493	0.1824	7.70246	1.33468e-14	2.37969e-13	179.58	1.14235	0.194382	5.87684	4.18176e-09	3.78349e-08	VIT_00s2395g00010	NA	NA	NA	NA	NA	NA	NA	NA	NA	NA	NA	NA	NA	NA	NA	'35.2'	'not assigned.not annotated'	' no hits & (original description: none)'
Vitvi00g02285	0.0391719	2.18182	6.5708	0.332048	0.739853	NA	0.0391719	0	5.88922	0	1	NA	0.0391719	0	5.88968	0	1	NA	0.0391719	0	5.88968	0	1	NA		AT3G01410.1	1.4e-08	59.7	1-to-many	AT3G01410.2	AT3G01410.1	Polynucleotidyl transferase%2C ribonuclease H-like superfamily protein	NA	NA	NA	NA	Polynucleotidyl transferase%2C ribonuclease H-like superfamily protein%3B FUNCTIONS IN: ribonuclease H activity%2C nuclease activity%2C nucleic acid binding%3B INVOLVED IN: biological_process unknown%3B LOCATED IN: cellular_component unknown%3B EXPRESSED IN: 12 plant structures%3B EXPRESSED DURING: 7 growth stages%3B CONTAINS InterPro DOMAIN/s: Polynucleotidyl transferase%2C ribonuclease H fold (…	****	gene:2096691.UniProt:F4JEB4	NA	'35.2'	'not assigned.not annotated'	' no hits & (original description: none)'
Vitvi00g02286	0.827464	-3.63336	6.16546	-0.589309	0.555654	NA	0.827464	-3.73473	5.50047	-0.678985	0.497148	NA	0.827464	-2.09471	5.53631	-0.378358	0.705164	0.785148	0.827464	0	5.60175	0	1	NA	GSVIVT00033736001	NA	NA	NA	NA	NA	NA	NA	NA	NA	NA	NA	NA	NA	NA	NA	'35.2'	'not assigned.not annotated'	' no hits & (original description: none)'
Vitvi00g02287	22.1486	-8.07645	1.51463	-5.33228	9.69894e-08	1.05187e-06	22.1486	-4.98835	0.851129	-5.86086	4.60478e-09	4.37943e-08	22.1486	-6.16946	1.1123	-5.54656	2.91344e-08	2.13601e-07	22.1486	-6.20535	1.26776	-4.89473	9.84413e-07	5.86015e-06	VIT_00s2416g00010	AT3G13580.1	7e-09	58.2	1-to-many	AT3G13580.2.AT3G13580.3.AT3G13580.4.AT3G13580.5.AT3G13580.6.AT3G13580.7.AT3G13580.8.AT3G13580.9	AT3G13580.1	Ribosomal protein L30/L7 family protein	NA	NA	NA	NA	Ribosomal protein L30/L7 family protein%3B FUNCTIONS IN: structural constituent of ribosome%2C transcription regulator activity%3B INVOLVED IN: translation%3B LOCATED IN: cytosolic ribosome%2C cytosolic large ribosomal subunit%2C chloroplast%2C large ribosomal subunit%2C membrane%3B EXPRESSED IN: 22 plant structures%3B EXPRESSED DURING: 13 growth stages%3B CONTAINS InterPro DOMAIN/s: Ribosomal pr…	****	PMID:15028209.PMID:15734919.PMID:15821981.PMID:17432890.PMID:17934214.gene:2086808.UniProt:Q9LHP1	NA	'35.2'	'not assigned.not annotated'	' no hits & (original description: none)'
Vitvi00g02289	7.66678	1.19598	0.990277	1.20772	0.227155	0.348331	7.66678	2.10306	0.887863	2.36868	0.0178518	0.0392014	7.66678	2.36475	0.875897	2.69981	0.00693793	0.0169002	7.66678	2.34653	0.957121	2.45165	0.0142202	0.0313804	VIT_00s2419g00010	AT1G51090.1	2.7e-10	65.1	1-to-1	NA	AT1G51090.1	Heavy metal transport/detoxification superfamily protein	NA	NA	NA	NA	Heavy metal transport/detoxification superfamily protein %3B FUNCTIONS IN: metal ion binding%3B INVOLVED IN: defense response to fungus%3B LOCATED IN: cellular_component unknown%3B EXPRESSED IN: 15 plant structures%3B EXPRESSED DURING: 9 growth stages%3B CONTAINS InterPro DOMAIN/s: Heavy metal transport/detoxification protein (InterPro:IPR006121)%3B BEST Arabidopsis thaliana protein match is: Hea…	*****	gene:2026041.UniProt:Q9C684	NA	'35.2'	'not assigned.not annotated'	' no hits & (original description: none)'
Vitvi00g02292	0.0365312	0	6.58482	0	1	NA	0.0365312	1.07649	5.88922	0.18279	0.854963	NA	0.0365312	0	5.88968	0	1	NA	0.0365312	0	5.88968	0	1	NA	VIT_00s2436g00010	AT1G13320.4	2.1e-13	73.6	1-to-1	NA	AT1G13320.4	protein phosphatase 2A subunit A3	NA	"PP2AA3"	NA	protein phosphatase 2A subunit A3	NA	NA	NA	NA	'35.1'	'not assigned.annotated'	'Serine/threonine-protein phosphatase 2A 65 kDa regulatory subunit A beta isoform OS=Arabidopsis thaliana (sp|q38950|2aab_arath : 135.0)'
Vitvi00g02293	56.7387	0.780192	0.318098	2.45267	0.0141798	0.0382747	56.7387	1.22099	0.299203	4.08081	4.48783e-05	0.000198809	56.7387	1.06208	0.28396	3.74024	0.000183844	0.000657253	56.7387	0.966017	0.295661	3.26731	0.00108575	0.00327198	VIT_00s2439g00010	AT3G60800.1	2.8e-12	70.5	1-to-1	NA	AT3G60800.1	DHHC-type zinc finger family protein	NA	NA	NA	NA	DHHC-type zinc finger family protein%3B FUNCTIONS IN: zinc ion binding%3B INVOLVED IN: biological_process unknown%3B EXPRESSED IN: 23 plant structures%3B EXPRESSED DURING: 13 growth stages%3B CONTAINS InterPro DOMAIN/s: Zinc finger%2C DHHC-type (InterPro:IPR001594)%3B BEST Arabidopsis thaliana protein match is: DHHC-type zinc finger family protein (TAIR:AT4G22750.1)%3B Has 5091 Blast hits to 5089…	****	PMID:17932292.gene:2101805.UniProt:Q8VYP5	NA	'35.2'	'not assigned.not annotated'	' no hits & (original description: none)'
Vitvi00g02294	42.837	-0.190739	0.322278	-0.591844	0.553955	0.673033	42.837	-0.97176	0.308284	-3.15216	0.0016207	0.00487977	42.837	-0.0558881	0.277235	-0.201591	0.840237	0.888546	42.837	0.044166	0.287072	0.15385	0.877728	0.917051	VIT_00s2440g00010	NA	NA	NA	NA	NA	NA	NA	NA	NA	NA	NA	NA	NA	NA	NA	'35.2'	'not assigned.not annotated'	' no hits & (original description: none)'
Vitvi00g02295	16.5145	2.79655	0.509401	5.48989	4.02182e-08	4.65492e-07	16.5145	3.61602	0.648554	5.5755	2.46814e-08	2.08147e-07	16.5145	3.56296	0.52326	6.80917	9.81646e-12	1.22136e-10	16.5145	3.58443	0.741689	4.8328	1.34629e-06	7.81353e-06		NA	NA	NA	NA	NA	NA	NA	NA	NA	NA	NA	NA	NA	NA	NA	'35.2'	'not assigned.not annotated'	' no hits & (original description: none)'
Vitvi00g02296	6.2502	-4.36423	1.63972	-2.66158	0.00777757	0.0233294	6.2502	-4.62269	1.47478	-3.1345	0.00172147	0.00514745	6.2502	-7.08874	1.43288	-4.94719	7.52929e-07	4.3536e-06	6.2502	-4.5108	1.4878	-3.03186	0.00243048	0.00663906		AT4G15020.1	2.3e-26	118.2	1-to-many	AT4G15020.2	AT4G15020.1	hAT transposon superfamily	NA	NA	NA	NA	hAT transposon superfamily%3B FUNCTIONS IN: protein dimerization activity%2C DNA binding%3B INVOLVED IN: biological_process unknown%3B LOCATED IN: cellular_component unknown%3B EXPRESSED IN: 19 plant structures%3B EXPRESSED DURING: 8 growth stages%3B CONTAINS InterPro DOMAIN/s: HAT dimerisation (InterPro:IPR008906)%2C Zinc finger%2C BED-type predicted (InterPro:IPR003656)%2C Protein of unknown fu…	****	gene:2129599.UniProt:F4JJC1	NA	'35.2'	'not assigned.not annotated'	' no hits & (original description: none)'
Vitvi00g02300	104.127	1.09847	0.462214	2.37653	0.0174763	0.0455076	104.127	0.892563	0.4095	2.17964	0.0292839	0.0598022	104.127	0.762261	0.411081	1.85428	0.0636985	0.115047	104.127	1.19748	0.410985	2.9137	0.00357177	0.00933298	VIT_00s2485g00010	AT4G23160.1	1.7e-47	189.1	1-to-1	NA	AT4G23160.1	cysteine-rich RECEPTOR-like kinase	Encodes a cysteine-rich receptor-like protein kinase.	"CRK8"	NA	cysteine-rich RLK (RECEPTOR-like protein kinase) 8	cysteine-rich RLK (RECEPTOR-like protein kinase) 8 (CRK8)%3B FUNCTIONS IN: kinase activity%3B INVOLVED IN: protein amino acid phosphorylation%3B CONTAINS InterPro DOMAIN/s: Protein kinase%2C ATP binding site (InterPro:IPR017441)%2C Reverse transcriptase%2C RNA-dependent DNA polymerase (InterPro:IPR013103)%2C Serine/threonine-protein kinase domain (InterPro:IPR002290)%2C Protein of unknown functio…	**	gene:2121650	NA	'50.2.7'	'Enzyme classification.EC_2 transferases.EC_2.7 transferase transferring phosphorus-containing group'	'Cysteine-rich receptor-like protein kinase 26 OS=Arabidopsis thaliana (sp|q9t0j1|crk26_arath : 128.0) & Enzyme classification.EC_2 transferases.EC_2.7 transferase transferring phosphorus-containing group(50.2.7 : 49.5) (original description: none)'
Vitvi00g02301	0.0338169	-0.176311	6.58027	-0.0267939	0.978624	NA	0.0338169	0	5.88922	0	1	NA	0.0338169	0	5.88968	0	1	NA	0.0338169	0	5.88968	0	1	NA	VIT_00s2496g00010	AT1G13320.4	7.3e-14	75.1	1-to-1	NA	AT1G13320.4	protein phosphatase 2A subunit A3	NA	"PP2AA3"	NA	protein phosphatase 2A subunit A3	NA	NA	NA	NA	'35.1'	'not assigned.annotated'	'Serine/threonine-protein phosphatase 2A 65 kDa regulatory subunit A beta isoform OS=Arabidopsis thaliana (sp|q38950|2aab_arath : 135.0)'
Vitvi00g02303	0	NA	NA	NA	NA	NA	0	NA	NA	NA	NA	NA	0	NA	NA	NA	NA	NA	0	NA	NA	NA	NA	NA		NA	NA	NA	NA	NA	NA	NA	NA	NA	NA	NA	NA	NA	NA	NA	'35.2'	'not assigned.not annotated'	' no hits & (original description: none)'
Vitvi00g02304	0.130957	0	6.58482	0	1	NA	0.130957	-2.2407	5.83496	-0.384013	0.700969	NA	0.130957	0	5.88968	0	1	NA	0.130957	0	5.88968	0	1	NA		NA	NA	NA	NA	NA	NA	NA	NA	NA	NA	NA	NA	NA	NA	NA	'35.2'	'not assigned.not annotated'	' no hits & (original description: none)'
Vitvi00g02305	638.813	1.34214	0.201041	6.67595	2.45633e-11	4.68951e-10	638.813	1.87802	0.18145	10.3501	4.18203e-25	2.31785e-23	638.813	1.82467	0.181453	10.0559	8.65439e-24	3.4368e-22	638.813	1.13292	0.180285	6.28403	3.29903e-10	3.56061e-09	VIT_00s2536g00010	AT2G17760.1	6.1e-21	98.6	1-to-1	NA	AT2G17760.1	Eukaryotic aspartyl protease family protein	NA	NA	NA	NA	Eukaryotic aspartyl protease family protein%3B FUNCTIONS IN: aspartic-type endopeptidase activity%3B INVOLVED IN: proteolysis%3B LOCATED IN: anchored to membrane%3B EXPRESSED IN: 22 plant structures%3B EXPRESSED DURING: 13 growth stages%3B CONTAINS InterPro DOMAIN/s: Peptidase aspartic (InterPro:IPR021109)%2C Peptidase aspartic%2C catalytic (InterPro:IPR009007)%2C Peptidase A1 (InterPro:IPR001461…	****	PMID:12805588.gene:2827920.UniProt:Q8VYV9	NA	'35.1'	'not assigned.annotated'	'Aspartyl protease family protein 1 OS=Arabidopsis thaliana (sp|q8vyv9|apf1_arath : 95.1)'
Vitvi00g02308	1.26644	-3.99046	3.43675	-1.16111	0.245595	0.36948	1.26644	-2.7981	3.09354	-0.904499	0.365731	0.473142	1.26644	-3.16599	3.03686	-1.04252	0.297171	0.406896	1.26644	-2.55928	3.1249	-0.818995	0.412789	0.520323		NA	NA	NA	NA	NA	NA	NA	NA	NA	NA	NA	NA	NA	NA	NA	'35.1'	'not assigned.annotated'	'RNA-directed DNA polymerase homolog OS=Oenothera berteroana (sp|p31843|rrpo_oenbe : 92.8)'
Vitvi00g02312	20.6497	0.804553	0.379967	2.11743	0.0342236	0.0786759	20.6497	0.743162	0.376669	1.97298	0.0484973	0.0915279	20.6497	0.88043	0.346207	2.54307	0.0109882	0.0252444	20.6497	1.68985	0.471764	3.58197	0.000341012	0.00116779		AT1G43760.1	7.9e-27	119.8	1-to-1	NA	AT1G43760.1	DNAse I-like superfamily protein	NA	NA	NA	NA	DNAse I-like superfamily protein%3B CONTAINS InterPro DOMAIN/s: Endonuclease/exonuclease/phosphatase (InterPro:IPR005135)%2C RNA-directed DNA polymerase (reverse transcriptase)%2C related (InterPro:IPR015706)%3B BEST Arabidopsis thaliana protein match is: DNAse I-like superfamily protein (TAIR:AT1G40390.1)%3B Has 1816 Blast hits to 1744 proteins in 56 species: Archae - 0%3B Bacteria - 6%3B Metazo…	*	gene:3433966.UniProt:F4ICS8	NA	'35.2'	'not assigned.not annotated'	' no hits & (original description: none)'
Vitvi00g02313	27.3327	-7.33849	2.02965	-3.61565	0.000299594	0.00146018	27.3327	-7.40508	1.74017	-4.25537	2.08701e-05	9.98518e-05	27.3327	-3.78706	1.31305	-2.88417	0.0039245	0.0102358	27.3327	-2.59751	1.35869	-1.91178	0.055904	0.101903	VIT_00s2588g00010	AT5G38280.1	2.6e-95	347.1	1-to-many	AT5G38280.2	AT5G38280.1	PR5-like receptor kinase	putative receptor serine/threonine kinase PR5K (PR5K) mRNA%2C PR5-like receptor kinase	"PR5K"	NA	PR5-like receptor kinase	PR5-like receptor kinase (PR5K)%3B FUNCTIONS IN: transmembrane receptor protein serine/threonine kinase activity%2C kinase activity%3B INVOLVED IN: response to fungus%3B LOCATED IN: endomembrane system%3B EXPRESSED IN: 6 plant structures%3B EXPRESSED DURING: petal differentiation and expansion stage%3B CONTAINS InterPro DOMAIN/s: Protein kinase%2C ATP binding site (InterPro:IPR017441)%2C Protein …	*****	PMID:8637920.gene:2176736.UniProt:Q9FF29	NA	'50.2.7'	'Enzyme classification.EC_2 transferases.EC_2.7 transferase transferring phosphorus-containing group'	'Rust resistance kinase Lr10 OS=Triticum aestivum (sp|p93604|lrk10_wheat : 367.0) & Enzyme classification.EC_2 transferases.EC_2.7 transferase transferring phosphorus-containing group(50.2.7 : 126.4) (original description: none)'
Vitvi00g02314	0.144754	0	6.58482	0	1	NA	0.144754	-2.04165	5.84444	-0.349332	0.72684	NA	0.144754	-0.537148	5.88968	-0.0912017	0.927332	NA	0.144754	0	5.88968	0	1	NA		NA	NA	NA	NA	NA	NA	NA	NA	NA	NA	NA	NA	NA	NA	NA	'35.2'	'not assigned.not annotated'	' no hits & (original description: none)'
Vitvi00g02316	3.34866	-2.75518	1.77975	-1.54807	0.121606	0.215004	3.34866	-3.18499	1.61346	-1.97401	0.0483808	0.0913395	3.34866	1.97135	1.14057	1.72839	0.0839185	0.145209	3.34866	4.38578	1.60362	2.73493	0.00623932	0.0152467		NA	NA	NA	NA	NA	NA	NA	NA	NA	NA	NA	NA	NA	NA	NA	'35.2'	'not assigned.not annotated'	' no hits & (original description: none)'
Vitvi00g02317	0	NA	NA	NA	NA	NA	0	NA	NA	NA	NA	NA	0	NA	NA	NA	NA	NA	0	NA	NA	NA	NA	NA	VIT_00s2608g00020	ATCG00680.1	8.9e-13	69.7	1-to-1	NA	ATCG00680.1	photosystem II reaction center protein B	encodes for CP47%2C subunit of the photosystem II reaction center.	"PSBB"	NA	photosystem II reaction center protein B	photosystem II reaction center protein B (PSBB)%3B FUNCTIONS IN: chlorophyll binding%3B INVOLVED IN: photosynthesis%2C light reaction%2C photosystem II assembly%3B LOCATED IN: in 6 components%3B EXPRESSED IN: 24 plant structures%3B EXPRESSED DURING: 13 growth stages%3B CONTAINS InterPro DOMAIN/s: Photosystem antenna protein-like (InterPro:IPR000932)%2C Photosystem II%2C PsbB (InterPro:IPR017486)%…	*****	PMID:9112766.PMID:8768377.PMID:11549768.PMID:12782738.PMID:14519118.PMID:14729914.PMID:15322131.PMID:15918885.PMID:16461379.PMID:17175536.PMID:17432890.PMID:18431481.PMID:18633119.gene:1009022880	NA	'35.2'	'not assigned.not annotated'	' no hits & (original description: none)'
Vitvi00g02320	2.40678	-3.87505	1.95584	-1.98127	0.0475608	0.102603	2.40678	-4.71457	1.67317	-2.81775	0.00483616	0.0126951	2.40678	-3.35612	1.67514	-2.00349	0.0451248	0.08575	2.40678	-4.75426	1.67886	-2.83184	0.00462803	0.01171	VIT_00s2628g00010	AT5G05170.1	1.1e-30	130.6	1-to-1	NA	AT5G05170.1	Cellulose synthase family protein	Encodes a cellulose synthase isomer. CESA3 mutants have cellulose defect in the primary cell wall. Multiple lines of evidence suggest that CESA3%2C along with CESA1 and CESA6 are present in the same plasma membrane complex for cellulose biosynthesis. As inferred from the null role of secondary wall-type CesAs%2C included in a set of five primary wall-type CesAs that may support trichome cell wall…	"CEV1"	ATCESA3.ATH-B.CESA3.CELLULOSE SYNTHASE 3.ELI1.ECTOPIC LIGNIFICATION 1.IXR1.ISOXABEN RESISTANT 1.MRE1.multiple response expansion 1	CONSTITUTIVE EXPRESSION OF VSP 1	CONSTITUTIVE EXPRESSION OF VSP 1 (CEV1)%3B FUNCTIONS IN: cellulose synthase activity%2C transferase activity%2C transferring glycosyl groups%3B INVOLVED IN: primary cell wall biogenesis%2C cellulose biosynthetic process%2C defense response%3B LOCATED IN: Golgi apparatus%2C plasma membrane%3B EXPRESSED IN: 27 plant structures%3B EXPRESSED DURING: 14 growth stages%3B CONTAINS InterPro DOMAIN/s: Cel…	****	PMID:10330464.PMID:9445479.PMID:9165747.PMID:11842152.PMID:12437300.PMID:12481071.PMID:12713541.PMID:14506206.PMID:15020435.PMID:15940463.PMID:16020787.PMID:16255250.PMID:16453133.PMID:16618929.PMID:16891551.PMID:17189328.PMID:17317660.PMID:17351116.PMID:17878303.PMID:18393624.PMID:18495638.gene:2156788.UniProt:Q941L0	NA	'35.1'	'not assigned.annotated'	'Cellulose synthase A catalytic subunit 3 [UDP-forming] OS=Arabidopsis thaliana (sp|q941l0|cesa3_arath : 131.0)'
Vitvi00g02323	0.0783438	2.92299	6.53174	0.447505	0.65451	NA	0.0783438	0	5.88922	0	1	NA	0.0783438	0	5.88968	0	1	NA	0.0783438	0	5.88968	0	1	NA	VIT_00s2643g00010	AT1G73450.1	3.7e-16	83.2	1-to-1	NA	AT1G73450.1	Protein kinase superfamily protein	NA	NA	NA	NA	Protein kinase superfamily protein%3B FUNCTIONS IN: protein serine/threonine kinase activity%2C protein kinase activity%2C kinase activity%2C ATP binding%3B INVOLVED IN: protein amino acid phosphorylation%3B LOCATED IN: cytosol%2C plasma membrane%3B EXPRESSED IN: cultured cell%3B CONTAINS InterPro DOMAIN/s: Protein kinase%2C catalytic domain (InterPro:IPR000719)%2C Serine/threonine-protein kinase…	****	PMID:17317660.PMID:18433157.PMID:21075962.gene:2206854.UniProt:F4HQ87	NA	'35.2'	'not assigned.not annotated'	' no hits & (original description: none)'
Vitvi00g02324	0.172033	0	6.58482	0	1	NA	0.172033	-1.67274	5.86453	-0.285231	0.775467	NA	0.172033	0.424632	5.88968	0.0720976	0.942524	NA	0.172033	0	5.88968	0	1	NA	VIT_00s2643g00020	AT4G15180.1	8.9e-23	104	1-to-1	NA	AT4G15180.1	SET domain protein 2	NA	"SDG2"	ATXR3	SET domain protein 2	SET domain protein 2 (SDG2)%3B EXPRESSED IN: male gametophyte%2C cultured cell%3B EXPRESSED DURING: M germinated pollen stage%3B CONTAINS InterPro DOMAIN/s: SET domain (InterPro:IPR001214)%3B BEST Arabidopsis thaliana protein match is: histone methyltransferases(H3-K4 specific)%3Bhistone methyltransferases(H3-K36 specific) (TAIR:AT1G77300.1)%3B Has 30201 Blast hits to 17322 proteins in 780 specie…	**	gene:2129754.UniProt:O23372	NA	'35.1'	'not assigned.annotated'	'Histone-lysine N-methyltransferase ATXR3 OS=Arabidopsis thaliana (sp|o23372|atxr3_arath : 100.0)'
Vitvi00g02326	0.0371019	-0.621161	6.57192	-0.0945174	0.924698	NA	0.0371019	0	5.88922	0	1	NA	0.0371019	0	5.88968	0	1	NA	0.0371019	0	5.88968	0	1	NA		AT1G24090.1	0.00085	42.4	1-to-many	AT3G01410.1.AT3G01410.2	AT1G24090.1	RNase H family protein	NA	NA	NA	NA	RNase H family protein%3B FUNCTIONS IN: ribonuclease H activity%2C nucleic acid binding%3B INVOLVED IN: biological_process unknown%3B EXPRESSED IN: 11 plant structures%3B EXPRESSED DURING: 6 growth stages%3B CONTAINS InterPro DOMAIN/s: Ribosomal protein L9/RNase H1%2C N-terminal (InterPro:IPR009027)%2C Polynucleotidyl transferase%2C ribonuclease H fold (InterPro:IPR012337)%2C Ribonuclease H (Inte…	***	gene:3434063.UniProt:F4I7R5	NA	'35.2'	'not assigned.not annotated'	' no hits & (original description: none)'
Vitvi00g02327	0.255859	3.79474	6.48358	0.585284	0.558357	NA	0.255859	0	5.88922	0	1	NA	0.255859	2.55094	5.84633	0.436331	0.662596	NA	0.255859	0	5.88968	0	1	NA	VIT_00s2651g00020	AT5G40820.1	2.8e-29	125.6	1-to-many	AT5G40820.2.AT5G40820.3.AT5G40820.4	AT5G40820.1	Ataxia telangiectasia-mutated and RAD3-like protein	Encodes a Arabidopsis ortholog of the ATR protein kinase that is involved in a wide range of responses to DNA damage and plays a central role in cell-cycle regulation. Dominant loss of function alleles identified as suppressors of ALS also exhibit increased tolerance to aluminum. This may be due to the inhibition of terminal differentiation of the root apex upon exposure to Al.	"ATR"	ATATR.ARABIDOPSIS THALIANA ATAXIA TELANGIECTASIA-MUTATED AND RAD3-RELATED.ATRAD3	Ataxia telangiectasia-mutated and RAD3-related	Ataxia telangiectasia-mutated and RAD3-related (ATR)%3B FUNCTIONS IN: protein serine/threonine kinase activity%2C inositol or phosphatidylinositol kinase activity%2C binding%2C phosphotransferase activity%2C alcohol group as acceptor%3B INVOLVED IN: in 9 processes%3B EXPRESSED IN: 10 plant structures%3B EXPRESSED DURING: 6 growth stages%3B CONTAINS InterPro DOMAIN/s: Phosphatidylinositol 3-/4-kin…	*****	PMID:10611295.PMID:15276459.PMID:17227549.PMID:17209125.PMID:17487278.PMID:18435824.PMID:18528439.gene:2164480.UniProt:Q9FKS4	NA	'35.1'	'not assigned.annotated'	'Serine/threonine-protein kinase ATR OS=Arabidopsis thaliana (sp|q9fks4|atr_arath : 125.0)'
Vitvi00g02328	2.60358	-4.1117	2.02007	-2.03543	0.041808	0.0923951	2.60358	-2.90247	1.83159	-1.58467	0.113041	0.185431	2.60358	-4.00078	1.59803	-2.50357	0.0122948	0.0278749	2.60358	-3.6936	1.7906	-2.06277	0.0391342	0.0753615	VIT_00s2652g00010	AT3G09270.1	5.2e-15	78.6	1-to-1	NA	AT3G09270.1	glutathione S-transferase TAU 8	Encodes glutathione transferase belonging to the tau class of GSTs. Naming convention according to Wagner et al. (2002).	"GSTU8"	ATGSTU8.glutathione S-transferase TAU 8	glutathione S-transferase TAU 8	glutathione S-transferase TAU 8 (GSTU8)%3B FUNCTIONS IN: glutathione transferase activity%3B INVOLVED IN: response to cadmium ion%2C toxin catabolic process%3B LOCATED IN: cytoplasm%3B EXPRESSED IN: 7 plant structures%3B EXPRESSED DURING: LP.06 six leaves visible%2C LP.04 four leaves visible%2C 4 anthesis%2C petal differentiation and expansion stage%3B CONTAINS InterPro DOMAIN/s: Thioredoxin fold…	****	PMID:12090627.PMID:16502469.gene:2083543.UniProt:Q9SR36	NA	'35.1'	'not assigned.annotated'	'Glutathione transferase GST 23 OS=Zea mays (sp|q9fqa3|gst23_maize : 84.3)'
Vitvi00g02329	0	NA	NA	NA	NA	NA	0	NA	NA	NA	NA	NA	0	NA	NA	NA	NA	NA	0	NA	NA	NA	NA	NA	VIT_00s2652g00020	AT1G74590.1	1e-05	45.8	1-to-1	NA	AT1G74590.1	glutathione S-transferase TAU 10	Encodes glutathione transferase belonging to the tau class of GSTs. Naming convention according to Wagner et al. (2002).	"GSTU10"	ATGSTU10.GLUTATHIONE S-TRANSFERASE TAU 10	glutathione S-transferase TAU 10	glutathione S-transferase TAU 10 (GSTU10)%3B CONTAINS InterPro DOMAIN/s: Thioredoxin fold (InterPro:IPR012335)%2C Glutathione S-transferase%2C C-terminal-like (InterPro:IPR010987)%2C Glutathione S-transferase/chloride channel%2C C-terminal (InterPro:IPR017933)%2C Glutathione S-transferase%2C N-terminal (InterPro:IPR004045)%2C Thioredoxin-like fold (InterPro:IPR012336)%3B BEST Arabidopsis thaliana…	****	PMID:12090627.PMID:18334669.gene:2019094.UniProt:Q9CA57	NA	'35.2'	'not assigned.not annotated'	' no hits & (original description: none)'
Vitvi00g02332	0	NA	NA	NA	NA	NA	0	NA	NA	NA	NA	NA	0	NA	NA	NA	NA	NA	0	NA	NA	NA	NA	NA		AT1G48120.1	8.3e-52	202.6	1-to-1	NA	AT1G48120.1	serine/threonine-protein phosphatase 7 long form-like protein	NA	NA	MAIL3.MAIN-LIKE 3	NA	hydrolases%3Bprotein serine/threonine phosphatases%3B FUNCTIONS IN: hydrolase activity%2C protein serine/threonine phosphatase activity%3B INVOLVED IN: biological_process unknown%3B LOCATED IN: cellular_component unknown%3B EXPRESSED IN: 21 plant structures%3B EXPRESSED DURING: 12 growth stages%3B CONTAINS InterPro DOMAIN/s: Metallophosphoesterase (InterPro:IPR004843)%2C Aminotransferase-like%2C …	**	gene:2023791.UniProt:Q9LNG5	NA	'35.1'	'not assigned.annotated'	'Serine/threonine-protein phosphatase 7 long form homolog OS=Arabidopsis thaliana (sp|q9lng5|ppp7l_arath : 192.0)'
Vitvi00g02334	0	NA	NA	NA	NA	NA	0	NA	NA	NA	NA	NA	0	NA	NA	NA	NA	NA	0	NA	NA	NA	NA	NA		NA	NA	NA	NA	NA	NA	NA	NA	NA	NA	NA	NA	NA	NA	NA	'35.2'	'not assigned.not annotated'	' no hits & (original description: none)'
Vitvi00g02335	32.8009	-0.368131	0.394527	-0.933094	0.350771	0.481396	32.8009	-0.448907	0.3683	-1.21886	0.222896	0.321157	32.8009	-0.863022	0.348517	-2.47627	0.0132763	0.0298286	32.8009	0.207907	0.37459	0.555026	0.578877	0.675575		AT1G40390.1	4e-12	70.1	1-to-1	NA	AT1G40390.1	DNAse I-like superfamily protein	NA	NA	NA	NA	DNAse I-like superfamily protein%3B CONTAINS InterPro DOMAIN/s: Endonuclease/exonuclease/phosphatase (InterPro:IPR005135)%2C RNA-directed DNA polymerase (reverse transcriptase)%2C related (InterPro:IPR015706)%3B BEST Arabidopsis thaliana protein match is: DNAse I-like superfamily protein (TAIR:AT1G43760.1)%3B Has 796 Blast hits to 793 proteins in 14 species: Archae - 0%3B Bacteria - 0%3B Metazoa …	*	gene:2826512.UniProt:F4I7W9	NA	'35.2'	'not assigned.not annotated'	' no hits & (original description: none)'
Vitvi00g02336	49.9046	-3.82047	1.05523	-3.62051	0.000294022	0.00143516	49.9046	-4.4028	0.975701	-4.51244	6.4085e-06	3.42606e-05	49.9046	-2.40228	0.881579	-2.72497	0.00643073	0.0158052	49.9046	-3.89813	0.924265	-4.21755	2.46975e-05	0.000109427	VIT_00s2698g00010	NA	NA	NA	NA	NA	NA	NA	NA	NA	NA	NA	NA	NA	NA	NA	'35.2'	'not assigned.not annotated'	' no hits & (original description: none)'
Vitvi00g02337	94.374	0.838944	0.255569	3.28265	0.00102836	0.0042527	94.374	-0.330535	0.246476	-1.34105	0.179905	0.269814	94.374	-0.161465	0.236546	-0.682596	0.494862	0.604143	94.374	-1.35121	0.243496	-5.5492	2.86978e-08	2.24296e-07	VIT_00s2704g00010	NA	NA	NA	NA	NA	NA	NA	NA	NA	NA	NA	NA	NA	NA	NA	'35.2'	'not assigned.not annotated'	' no hits & (original description: none)'
Vitvi00g02343	0.285686	-1.60618	6.01815	-0.26689	0.789554	NA	0.285686	-1.52576	5.4117	-0.281937	0.777992	NA	0.285686	2.17024	5.40992	0.401159	0.688303	NA	0.285686	0.836046	5.43247	0.153898	0.87769	NA		NA	NA	NA	NA	NA	NA	NA	NA	NA	NA	NA	NA	NA	NA	NA	'35.2'	'not assigned.not annotated'	' no hits & (original description: none)'
Vitvi00g02345	245.306	-0.969451	0.354102	-2.73778	0.0061856	0.0193541	245.306	-0.605717	0.314558	-1.92562	0.0541523	0.100518	245.306	-0.37279	0.314122	-1.18677	0.235319	0.338538	245.306	-0.0991094	0.316022	-0.313615	0.753813	0.820008	VIT_00s2769g00010	AT4G35905.1	1.9e-10	63.5	1-to-1	NA	AT4G35905.1	Trm112p-like protein	NA	NA	NA	NA	unknown protein%3B CONTAINS InterPro DOMAIN/s: Protein of unknown function DUF343 (InterPro:IPR005651)%3B Has 30201 Blast hits to 17322 proteins in 780 species: Archae - 12%3B Bacteria - 1396%3B Metazoa - 17338%3B Fungi - 3422%3B Plants - 5037%3B Viruses - 0%3B Other Eukaryotes - 2996 (source: NCBI BLink).	*****	gene:3706175.UniProt:Q8LG27	NA	'35.2'	'not assigned.not annotated'	' no hits & (original description: none)'
[truncated: 40,856 more rows]
