# Supplementary material for: Scion genotypes exert long distance control over rootstock transcriptome responses to low phosphate in grafted grapevine
Source: BMC Plant Biol. 2020 Aug 3;20:367. doi: 10.1186/s12870-020-02578-y (PMC7398338; doi:10.1186/s12870-020-02578-y)
Supplement: Supplementary file 7 — Additional file 7. MapMan BINs enriched in the 24 genes down-regulated in the roots between the scion/rootstock combinations 1103P/PN versus PN/PN grown under both high and low phosphate supply. PN: Vitis vinifera cv. Pinot noir; 1103P: V. rupestris x V. berlandieri cv. 1103 Paulsen. [file 12870_2020_2578_MOESM7_ESM.docx]

Additional File 7. MapMan BINs enriched in the 24 genes down-regulated in the roots between the scion/rootstock combinations 1103P/PN and PN/PN grown under both high and low phosphate supply. PN: *Vitis vinifera* cv. Pinot noir; 1103P: *V. rupestris* x *V. berlandieri* cv. 1103 Paulsen.

| | **BIN** | **Name** | **Enrichment** | **Adjusted p-value** | | --- | --- | --- | --- | | 13.3.6.6.1 | Cell cycle.mitosis and meiosis.meiotic recombination.meiotic exit.MS5/TDM1 meiotic exit regulator | 268.6 | 0.05 | | 18.1.5.4 | Protein modification.N-linked glycosylation.oligosaccharyl transferase (OST) complex.OST4 component | 940.3 | 0.01 | | 18.12.1.4 | Protein modification.S-glutathionylation and deglutathionylation.glutathione S-transferase activities.class tau | 51.1 | 0.01 | | 25.4.2.1 | Nutrient uptake.iron uptake.reduction-based strategy uptake.Fe(III)-chelate reductase | 470.1 | 0.03 | | 25.5.2.1 | Nutrient uptake.copper uptake.reduction-based uptake.FRO metal ion-chelate reductase | 470.1 | 0.03 | | 50.1.13 | Enzyme classification.EC_1 oxidoreductases.EC_1.14 oxidoreductase acting on paired donor with incorporation or reduction of molecular oxygen | 25.2 | 0.00 | |  |  |  |
| --- | --- | --- | --- | --- | --- | --- | --- | --- | --- | --- | --- | --- | --- | --- | --- | --- | --- | --- | --- | --- | --- | --- | --- | --- | --- | --- | --- | --- | --- | --- | --- |
|  |  | | | |  |  |
|  |  | | | |  |  |
|  |  | | | |  |  |
|  |  | | | |  |  |
|  |  | | | |  |  |
|  |  | | | |  |  |
